# Supplementary material for: Identification of key genes by integrating DNA methylation and next-generation transcriptome sequencing for esophageal squamous cell carcinoma
Source: Aging (Albany NY). 2020 Jan 21;12(2):1332–65. doi: 10.18632/aging.102686 (PMC7053602; doi:10.18632/aging.102686)
Supplement: Supplementary Table 1 [file aging-12-102686-s003..xlsx]

## Sheet: 2017-9-7-diffmethy-probe
Supplementary Table S1.Basic information of 80557 DMPs
ILMNID	ProbeID_A	ProbeID_B	ADDRESSA_ID	ALLELEA_PROBESEQ	minfi-pval	ADDRESSB_ID	ALLELEB_PROBESEQ	INFINIUM_DESIGN_TYPE	NEXT_BASE	COLOR_CHANNEL	FORWARD_SEQUENCE	GENOME_BUILD	CHR	MAPINFO	SOURCESEQ	CHROMOSOME_36	COORDINATE_36	STRAND	PROBE_SNPS	PROBE_SNPS_10	RANDOM_LOCI	METHYL27_LOCI	UCSC_REFGENE_NAME	UCSC_REFGENE_ACCESSION	UCSC_REFGENE_GROUP	UCSC_CPG_ISLANDS_NAME	RELATION_TO_UCSC_CPG_ISLAND	PHANTOM	DMR	ENHANCER	HMM_ISLAND	REGULATORY_FEATURE_NAME	REGULATORY_FEATURE_GROUP	DHS
cg00000321	62789509	62789509	62789509	ATAAATACCCAATAAACCTAACTAAACTCCCTAAAAAACRAAACRAAAAC	6.97e-07	NA		II			GAGGTCTGCTTGTAAATACCCAGTGGGCCTGGCTGGGCTCCCTGGAAGGCGAGGCGAAGG[CG]CAGTTGGAGCTGTTTGCTGTGAGCAGCACCTCTCCAGGTGGGGCCGCCCATGGTGGCCCT	37	8	41167802	CGCCTTCGCCTCGCCTTCCAGGGAGCCCAGCCAGGCCCACTGGGTATTTA	8	41286959	R			NA	NA	SFRP1	NM_003012	TSS1500	chr8:41165852-41167140	S_Shore			NA				NA
cg00000884	59727471	59727471	59727471	TAAAACACAAATTACTCATACTATTATTATAACTTAAAAACACRTTAAAC	0.0162933	NA		II			GAACACGTCCTTAAGGCACAGATTGCTCATGCTATTGTTGTGGCTTAGGAACACGTTAAG[CG]GTTTTCTGCCCTGGGTGGGCCAGGTGTTCCTTGCCCTCATTCCAGTAAACCCACAACCTT	37	4	154609857	CGCTTAACGTGTTCCTAAGCCACAACAATAGCATGAGCAATCTGTGCCTT	4	154829307	R			NA	NA	TLR2	NM_003264	5'UTR	chr4:154605086-154606052	S_Shelf			NA				NA
cg00001364	63784353	63784353	63784353	ACCAATTTAATATAAATCRCTTATATAATAAACACCTAAAAACAAAACRC	0.00767257	NA		II			GCCTACTATGAGCCAGTTTGATATGGATCGCTTATGTGATGAGCACCTGAGAGCAAAGCG[CG]CCCGGGTTGAGAATATAATTCGGGGTATGAGCCATTCCCCCAGTGTGGCATTAAGGGGCA	37	1	214170376	CCAGTTTGATATGGATCGCTTATGTGATGAGCACCTGAGAGCAAAGCGCG	1	212236999	R			NA	NA	PROX1	NM_002763	Body			low-CpG:212236729-212237006	CDMR	NA	1:212236997-212238160			NA
cg00001583	55630379	24638471	55630379	ACAAAAAATAAAACCTAAACAAAAACCTAATACACCCACAAATTTCACCA	0.000942079	24638471	ACAAAAAATAAAACCTAAACGAAAACCTAATACGCCCACGAATTTCGCCG	I	A	Red	CGCCGTTGGGTAGCAGGAGGTAGAGCCTAGGCGAGAGCCTGGTGCGCCCACGGGTTTCGC[CG]AAGAGTGCCCGGGGGAGTGCGGGCAGGGTCCCGGCTGCGCAGACCTGCGGGTGCCCGCCC	37	1	200011786	CGGCGAAACCCGTGGGCGCACCAGGCTCTCGCCTAGGCTCTACCTCCTGC	1	198278409	R			NA	NA	NR5A2	NM_205860;NM_003822	Body;Body	chr1:200011400-200012055	Island			NA	1:198278176-198278678			NA
cg00001791	66672366	66672366	66672366	TTATACCACACACATACTTAATATACTATAAAAACTCTTTTTTCCATCAC	0.0131705	NA		II			AAATGGGAGAACTCTTTAGAAGCAAGAACCTTAGGTCTTCTTGCTTCTAAAATGGAAAAT[CG]TGATGGAAAAAAGAGCTCCCACAGTATATTAAGCATGTGTGTGGTACAAACATTGAGCAA	37	2	103414042	CGTGATGGAAAAAAGAGCTCCCACAGTATATTAAGCATGTGTGTGGTACA	2	102780474	F			NA	NA	TMEM182	NM_144632	Body					NA				NA
cg00002033	59608375	25668441	59608375	TAACTATAACTCTAAAATAATACCCCATAATCCCCATCAAACAAATAACA	0.00021353	25668441	TAACTATAACTCTAAAATAATACCCCGTAATCCCCGTCGAACGAATAACG	I	C	Grn	GCGCGGCGCGGGTAACTGTGGCTCTGGAATAGTGCCCCGTAGTCCCCGTCGAACGAATAG[CG]CTGCTGCGGCCTCGGCCGGGCCGCGGCTCCCCCAGGAACTAGAGCTAGAGTAGGGGGCGC	37	19	39798481	TAACTGTGGCTCTGGAATAGTGCCCCGTAGTCCCCGTCGAACGAATAGCG	19	44490321	R			NA	NA	LRFN1	NM_020862	Body	chr19:39797786-39799250	Island			TRUE	19:44489564-44491070			TRUE
cg00002145	13630360	13630360	13630360	TCAATCAAAAAAAATTCCACCTTCACAAATAACATACTAACATTATCCAC	0.00194701	NA		II			TGGAGCCATAGTCAGTCAGGGAGAATTCCACCTTCACAGGTGGCATGCTGGCATTGTCCA[CG]GACTCAGAGGGCGCGTGCTGCACAACTGCCACTCTGGCGAAGTGCTGGGAGGCCTTGGGA	37	2	238249536	CAGTCAGGGAGAATTCCACCTTCACAGGTGGCATGCTGGCATTGTCCACG	2	237914275	R			NA	NA	COL6A3	NM_004369;NM_057166;NM_057167	Body;Body;Body					TRUE				NA
cg00002591	67798458	67798458	67798458	ACCCAATAAAAAACCAAACATACTCTTACCATATCCATCTCCACTTCTTC	0.000700567	NA		II			TACTCTACCTCCCCAACACGATGTCCTCCTCAGAGACGGACTTGCTTTAATTCTCACTAG[CG]AAGAAGTGGAGATGGACATGGCAAGAGCATGTTTGGCTTTTCACTGGGCAGTTGCTGGCT	37	3	52870543	CCCAGTGAAAAGCCAAACATGCTCTTGCCATGTCCATCTCCACTTCTTCG	3	52845583	F			NA	NA	MUSTN1	NM_205853	TSS1500					NA				NA
cg00002719	52741444	27736432	52741444	CAATAATCTAAAAATATTACATACACCTACACAAATTTTTATCACTCTCA	2.44e-06	27736432	CGATAATCTAAAAATATTACATACGCCTACGCAAATTTTTATCGCTCTCG	I	T	Red	GGACCACACTGCCATGGCAACAGCGTGCCTCTGCGTCCTCCATCCGGGCCTCTCTAACTA[CG]AGAGCGACAAAAATCTGCGCAGGCGCATGCAATATCCTCAGACCACCGACCCCTCCCGGC	37	1	169396706	CGAGAGCGACAAAAATCTGCGCAGGCGCATGCAATATCCTCAGACCACCG	1	167663330	F			NA	NA	C1orf114	NM_021179	TSS200	chr1:169396621-169396869	Island			TRUE	1:167663071-167663470			NA
cg00002749	39694480	30668499	39694480	AATTATTTACTATAAAAATAAAAATCTAATATCCATTACTTCATCCACCA	2.54e-06	30668499	AATTATTTACTATAAAAATAAAAATCTAATATCCGTTACTTCATCCGCCG	I	T	Red	GTCCAGTTTTCTAATTGTTTGCTATAGAAATGAAAGTCTAGTATCCGTTACTTCATCCGC[CG]TGAGACAGAAAACCTTCAGCCATAGACCAGGATCCCTAACCCATGCTCCCACAAGAGTTG	37	17	57839538	CGGCGGATGAAGTAACGGATACTAGACTTTCATTTCTATAGCAAACAATT	17	55194320	R			NA	NA	TMEM49	NM_030938	Body					TRUE				NA
cg00002810	51699408	51699408	51699408	CCTAATTTTAAAATTTACTTTATACACTCACCCAATAACCCCTTTCAAAC	0.00293963	NA		II			GCAGCAGCCACCCTGGTTTTGAAATTTACTTTGTACACTCACCCAGTGGCCCCTTTCAGA[CG]CCGCGACACGACCTCCCCCCATCTCGGACTCCCTGCCTCTGGGTTCTCTCGGCGGTTGAC	37	1	57888707	CTGGTTTTGAAATTTACTTTGTACACTCACCCAGTGGCCCCTTTCAGACG	1	57661295	R			NA	NA	DAB1	NM_021080	5'UTR	chr1:57887963-57890637	Island			NA	1:57661169-57661350			NA
cg00003287	74613411	30689311	74613411	AACTCTAAAAAAAAATAACACTAAATCAACAACATCAAATAAAATTCCCA	0.0207003	30689311	AACTCTAAAAAAAAATAACACTAAATCAACGACATCAAATAAAATTCCCG	I	C	Grn	GGAGCTCAGCTCAGCTCTGGGAGGGAATGGCACTGAGTCAGCGGCATCAAATGGAATTCC[CG]CGTTGGCCTGGAGAGGCGCTGCAGAGGACCCTGCACATCTGGTCGTTCTCAGTACTTCCA	37	1	201346149	AGCTCTGGGAGGGAATGGCACTGAGTCAGCGGCATCAAATGGAATTCCCG	1	199612772	R			NA	NA	TNNT2	NM_001001431;NM_001001430;NM_001001432;NM_000364	5'UTR;5'UTR;5'UTR;5'UTR					TRUE		1:201345724-201346713	Unclassified	TRUE
cg00003298	18807453	11695500	18807453	AATACAAAATCATATCAATAAACCTAAAATTATCCACAACATACAAACCA	0.00103918	11695500	AATACGAAATCATATCGATAAACCTAAAATTATCCGCGACGTACGAACCG	I	A	Red	TCGGTGTGTCCGGGTGCGAGATCATGTCGGTGAACCTGGGGTTGTCCGCGGCGTGCGGGC[CG]GCGAGCGGCGGTTCCAGCGCTCCCAGCGGCGTCGAGCCGGGGCCAGAGGCCGCCAGGAAG	37	12	113901210	CGGCCCGCACGCCGCGGACAACCCCAGGTTCACCGACATGATCTCGCACC	12	112385593	R			NA	NA	LHX5	NM_022363	Body	chr12:113900750-113906442	Island		DMR	TRUE	12:112384990-112386862	12:113900820-113901612	Unclassified_Cell_type_specific	NA
cg00003345	63753419	63753419	63753419	AACTAACCCATATAACTAAAAATACRTTACCAACAAAAACAAATACTCAC	0.0030994	NA		II			CTGGAAGGCTGGGCTGGCCCATATGGCTGGGAATACGTTGCCAGCAAGGGCAAGTGCTCA[CG]CGAGCCCGGCAGCCGGCTGTGACAGCTTCACGCTCGCCAACCAGGCCTCTGGCTTGCTCC	37	1	10816499	GCTGGCCCATATGGCTGGGAATACGTTGCCAGCAAGGGCAAGTGCTCACG	1	10739086	R			NA	NA	CASZ1	NM_001079843;NM_017766	5'UTR;5'UTR					TRUE		1:10815770-10816608	Unclassified	TRUE
cg00003529	55608464	55608464	55608464	TTATCATCAACTTAACAACCTCCACAATTTCATCTACTAAAACATCAAAC	0.0133015	NA		II			AGTACATACCTTTATCATCAGCTTGACAACCTCCACAGTTTCATCTGCTGAAACATCAAA[CG]GTTCAAAAGATCCTTCAAAGGCGATGAAAATCCTCATTGTACAATTACCTTTTCAAACAA	37	3	149510115	TATCATCAGCTTGACAACCTCCACAGTTTCATCTGCTGAAACATCAAACG	3	150992805	R			NA	NA	C3orf16	NM_001144960	1stExon					NA				NA
cg00003994	22624445	22624445	22624445	TAATAATAATAATACCCCCTATAATACTAACTAACAAACATACCCTCTTC	0.000952672	NA		II			GGTGGTGGTGGTGGTGGTGGTGGTGCCCCCTGTGATGCTGGCTGGCAAACATGCCCTCTT[CG]TTGGGGTATCCCGCGATTATGCAAGATGAGGAAGAAGTAGAGAGCTCGGGGTAAGACATA	37	7	15725862	GGTGGTGGTGGTGCCCCCTGTGATGCTGGCTGGCAAACATGCCCTCTTCG	7	15692387	R			NA	TRUE	MEOX2	NM_005924	1stExon				CDMR	NA	7:15692387-15692746			NA
cg00004067	66650471	63753418	66650471	ACACCTAACCCACCATTATTCTTAATAAAAAACTACTCCTTAACCAAACA	0.0242743	63753418	GCGCCTAACCCACCATTATTCTTAATAAAAAACTACTCCTTAACCGAACG	I	C	Grn	GCATGACCCACCGCGCCTGGCCCACCATTATTCTTAGTAAGAAGCTGCTCCTTGGCCGGG[CG]CAGTGGCTCAAGCCTGTAATCCCAGCACTTTGGGAGGCCGAGGCGGGTGGATCACGAGGT	37	3	36981714	CGCCCGGCCAAGGAGCAGCTTCTTACTAAGAATAATGGTGGGCCAGGCGC	3	36956718	R			NA	NA	TRANK1	NM_014831	Body	chr3:36985540-36987041	N_Shelf			NA				NA
cg00004257	18669490	18669490	18669490	CTCTAAAAACTTAACCTAAACCACCCCAATTCCCCTTCTTAAAAAAATAC	0.00772119	NA		II			GACGCTGAAGGCCAGAGTGGGCCAGAGAGCTCGCCACTCACTGACCTGCCAGAGGAGAGG[CG]CACTTTCCCAAGAAGGGGAACTGGGGTGGTCCAGGCCAAGCCTTCAGAGGTTCAATCGGT	37	1	34629175	TCTGAAGGCTTGGCCTGGACCACCCCAGTTCCCCTTCTTGGGAAAGTGCG	1	34401762	F			NA	NA	CSMD2	NM_052896	Body	chr1:34628783-34630976	Island		DMR	NA	1:34401230-34401763	1:34628492-34629526	Unclassified_Cell_type_specific	TRUE
cg00004883	51689483	74715390	51689483	ACCATACAAAACAACATACTCAACCTAAAAATAATACTACCCAACAAACA	0.000150924	74715390	ACCATACGAAACAACGTACTCAACCTAAAAATAATACTACCCGACGAACG	I	A	Red	GGGCCCCCCGCAGAGGGCGCTCACCGGAAATGCCGGCCTCGGCCCGCCGTGTGCAGCAGC[CG]CCCGTCGGGCAGCACCACCTCCAGGTTGAGCACGTTGTCCCGCATGGTGCCGTAGCGGAC	37	16	75148460	CGCCCGTCGGGCAGCACCACCTCCAGGTTGAGCACGTTGTCCCGCATGGT	16	73705961	F			NA	NA	LDHD	NM_194436;NM_153486	Body;Body	chr16:75148398-75148864	Island			NA	16:73705909-73707003			NA
cg00004979	18676462	29748440	18676462	AAATAAAAATACTACACACAACACTAACCCCACTCTATCAACAACAAACA	0.00170028	29748440	AAATAAAAATACTACACACGACACTAACCCCGCTCTATCAACGACAAACG	I	C	Grn	GGAGTTCAGGGTCCTAGAGGGACAGCCCGAGCCCACCATCCTCTCCTCCCACAGCACCTG[CG]CCTGTCGCTGACAGAGCGGGGCCAGTGCCGTGTGCAGCACCTCCACTTTCCCTCGGTCGT	37	12	111885466	CGCCTGTCGCTGACAGAGCGGGGCCAGTGCCGTGTGCAGCACCTCCACTT	12	110369849	F			NA	NA	SH2B3	NM_005475	Body					NA	12:110369849-110369963			NA
cg00005166	39716336	39716336	39716336	ATAAAATCCTTTACAATATCACTTCCTTTATTAAAATATAAAACTCTTCC	0.00126953	NA		II			AAGCATCACTAATGTCTTAAGATGACCAGGCAGAGGAAAGCAAGGGCTACACAGAAAACA[CG]GAAGAGCCCCATATCTCAACAAAGGAAGTGATACTGCAAAGGATTTCATGACAGAATTTC	37	16	3264442	CGGAAGAGCCCCATATCTCAACAAAGGAAGTGATACTGCAAAGGATTTCA	16	3204443	F			NA	NA	OR1F2P	NR_002169	TSS1500					NA				NA
cg00005215	59625470	59625470	59625470	TTTCTTCCAATCACCATTTTCTCTTTCTCCTTTTTTTTTAATTTTAAATC	0.0202167	NA		II			TGTTCACTTATTTTCTTCCAATCACCATTTTCTCTTTCTCCTTTTTTTTTGGTTTTAGAT[CG]TTATAAGTTTTACAATGGACTCTCTTGTTACAGCAAACACCAAATTTTGCTTTGATCTTT	37	18	61223377	CGATCTAAAACCAAAAAAAAAGGAGAAAGAGAAAATGGTGATTGGAAGAA	18	59374357	R			NA	NA	SERPINB12	NM_080474	TSS200					NA				NA
cg00006081	64762385	64762385	64762385	ATAAAAACACAAAAACCCCATACTCCAAATAACTAAATCCCTCTCTTATC	2.93e-05	NA		II			CATTCATAAAGGTGGGAGCACAGAGACCCCATACTCCAAGTAGCTGGGTCCCTCTCTTGT[CG]CTTTTAAAGGACGGGGTGCTGGGTTTGGGGGGCCAGTGAGAGGGATAAGAGGAGGGGATT	37	10	124908907	TGGGAGCACAGAGACCCCATACTCCAAGTAGCTGGGTCCCTCTCTTGTCG	10	124898897	R			NA	NA	HMX2	NM_005519	Body	chr10:124907283-124911035	Island			TRUE				NA
cg00006090	32649405	32649405	32649405	TCTCAATACATAAAAAACCTATAATTACACTATACTATAATCTACTAAAC	0.0300113	NA		II			ATTTCTTGGTTTCTCAGTGCATAGAAAACCTATGATTACACTATACTGTGGTCTACTAAG[CG]TGCAATAGTATTATGTCTAAGAAAACAAGGTGCATAACTTAATTAAAAATACTTTGTTGC	37	16	72206655	CGCTTAGTAGACCACAGTATAGTGTAATCATAGGTTTTCTATGCACTGAG	16	70764156	R			NA	NA	PMFBP1	NM_031293;NM_001160213	TSS1500;TSS1500					NA				NA
cg00006626	13733486	13733486	13733486	AACCAAAATCCCACRCAAAACCAAAAACAACAACAAAAAACRATATAAAC	0.00356047	NA		II			TTAAGTTTGTTGGCCAGGGTCCCACGCAAAACCAGAAACAACAACAGGAGGCGGTGTAGA[CG]CAAGAAGAAAAAGAGCCCGAAGCCTCGGCGTCTTGATGACGCCGGACAGCCAGTCATGGC	37	1	154127462	GCCAGGGTCCCACGCAAAACCAGAAACAACAACAGGAGGCGGTGTAGACG	1	152394086	R			NA	NA	NUP210L	NM_001159484;NM_207308	1stExon;1stExon					TRUE	1:152394024-152394220			NA
cg00007076	23602408	23602408	23602408	ATAAAAAAAACATTAATTTATACAATCCAACACTTACATACTTTCTTAAC	0.0160239	NA		II			GGGACTCAGAAGGACCTGGCCGCTGCCTTCATTGAGTTTAAAGGGACAGGATTGCCCTTC[CG]TCAAGAAAGTATGTAAGTGTTGGACTGCACAAATTAATGTTTTTCCCACAACCGAGACTT	37	8	67342600	TGGGAAAAACATTAATTTGTGCAGTCCAACACTTACATACTTTCTTGACG	8	67505154	F			NA	NA	RRS1	NM_015169;NM_015169	1stExon;3'UTR	chr8:67344497-67344989	N_Shore		RDMR	NA				NA
cg00007420	36634384	36634384	36634384	ACAAACACACTACACTTAAATCCTCCTAAAACCATTTCTTAATAAATAAC	0.00347214	NA		II			ATTCTATTGTTGCAAACACACTGCACTTAGATCCTCCTAAGGCCATTTCTTAATAGATAA[CG]ACAAGTGACCCAGAGCATTTTGGGAGACAAATGTTTTTCCCTCCCAGCACCGGTTTAATT	37	6	99796732	CAAACACACTGCACTTAGATCCTCCTAAGGCCATTTCTTAATAGATAACG	6	99903453	R			NA	NA	C6orf168	NM_032511	Body	chr6:99797208-99797946	N_Shore			NA				NA
cg00007644	13802477	13802477	13802477	AAATAAACAAATTACATTACRACCCRCACAATATCCTACTCTCCAACTAC	1.97e-05	NA		II			CGTTGCCACCCAGGTAAGCAGGTTGCATTACGGCCCGCACAGTGTCCTGCTCTCCAGCTG[CG]CGAGAGAGGCCAGCCGGGCCGTGGCGGGTGCACGTATGCTGATGGGGAAACCGGTTGGCA	37	11	20623259	GGTAAGCAGGTTGCATTACGGCCCGCACAGTGTCCTGCTCTCCAGCTGCG	11	20579835	R			NA	NA	SLC6A5	NM_004211	Body	chr11:20622720-20623399	Island			NA	11:20579297-20579975			NA
cg00008033	34743489	34743489	34743489	CCTTATTTATTCCTTCCAAAATTTTAAACACTTAATTCTCCRAAAACCCC	0.00718621	NA		II			TCCCAGAGTCGCCTTATTTATTCCTTCCAGAATTTTAGGCACTTGGTTCTCCGAAAGCCC[CG]ACGTTAAGATTGACTCCACCTACAGCAGAGGGAAGGCCCTTCTTCTCTCTTAAGGAAAAT	37	19	52429980	CGGGGCTTTCGGAGAACCAAGTGCCTAAAATTCTGGAAGGAATAAATAAG	19	57121792	R			TRUE	NA	ZNF613	NM_024840;NM_001031721	TSS1500;TSS1500					NA	19:57121792-57122733	19:52429898-52431083	Promoter_Associated	NA
cg00008036	30697326	30697326	30697326	AAAAAAACCCTTCRAAAAACTCTCRAAACAATCTCTTTCCAATAAATAAC	0.00365322	NA		II			AATAGGAACACAGAGGAGCCCTTCGGGAGGCTCTCGAGGCAGTCTCTTTCCAGTGGATAG[CG]ACACACCCTGGTCCCTAAGATTCTCATGCTCTCCGAATTTTCCGTCCTGGACCCGATCTG	37	1	179712091	CGCTATCCACTGGAAAGAGACTGCCTCGAGAGCCTCCCGAAGGGCTCCTC	1	177978714	R			NA	NA	FAM163A	NM_173509	TSS1500	chr1:179711947-179713951	Island		DMR	NA	1:177978482-177980627	1:179711768-179712249	Unclassified_Cell_type_specific	TRUE
cg00008544	65687470	65687470	65687470	AAAAAAAACTTAAAATCCCCAAAAAACACCCAAAACTCAAAAATAACTAC	0.0152677	NA		II			AAGGCACCTAAGCCAGCACGCACTCTTTGATTCTGGCTCCGAGTGGGCACCCCCATGGAC[CG]CAGCCACTCCTGAGCCCTGGGTGTCCTTTGGGGACCTCAAGCTCCTTCTCACATACAACC	37	5	179778527	CGCAGCCACTCCTGAGCCCTGGGTGTCCTTTGGGGACCTCAAGCTCCTTC	5	179711133	F			NA	NA	GFPT2	NM_005110	Body	chr5:179779114-179781279	N_Shore			NA		5:179778396-179778652	Unclassified_Cell_type_specific	NA
cg00009088	21681465	21681465	21681465	TCTAATTAAATCATAACTTATACCATATATCTACTTCTTAATTCTATTCC	0.0210185	NA		II			CCATGGCTCAATCTGATTAGATCATGGCTTATACCATGTATCTACTTCTTAATTCTGTTC[CG]GTTCTTTGGTCTGAGCATTTAGGTTGCGCCTGTGGTTGCATGCTTGGTTCTTCTGGGCAC	37	11	60930188	CGGAACAGAATTAAGAAGTAGATACATGGTATAAGCCATGATCTAATCAG	11	60686764	R			NA	NA	VPS37C	NM_017966	TSS1500	chr11:60928560-60929262	S_Shore			NA				NA
cg00010445	54634357	54634357	54634357	RTACCRAACACTAACACCTAAAAAATTCTCTAAATCCTAACCCTCTAATC	3.25e-07	NA		II			CCGTGGCGGCCGTGCCGAACACTAGCACCTGGGGGATTCTCTGGATCCTGACCCTCTGGT[CG]GGGCTGGCTCGGGCCGGGAGCCGGGACAGTGGCTCGAAGACCACTTTCTGCTGCGGCAGG	37	19	14089630	TGCCGAACACTAGCACCTGGGGGATTCTCTGGATCCTGACCCTCTGGTCG	19	13950630	R			NA	NA	RFX1	NM_002918	Body	chr19:14089570-14089796	Island			NA	19:13950446-13951021	19:14089239-14089882	Unclassified_Cell_type_specific	TRUE
cg00010654	16600461	16600461	16600461	AAACTTAAAAACACTTCAACCACAACCTAAAATAAATAAAATACTAAAAC	0.00097554	NA		II			TCCCAGTCTCCCTCCGAGCCCCCTTCACGTCCCGCCCCTTTCTGCTCTTAACCCTGCCTC[CG]CTCCAGTATCCCACCCACCCCAGGCTGTGGCTGAAGTGTTCCCAAGCCCTCCTGGCCCGG	37	1	45476118	GGCTTGGGAACACTTCAGCCACAGCCTGGGGTGGGTGGGATACTGGAGCG	1	45248705	F			NA	NA	HECTD3	NM_024602	Body	chr1:45476225-45477022	N_Shore			NA				NA
cg00010742	51660423	51660423	51660423	TCCTAAAACRCAAATTCCRAATTTTCTCAAAAATTTTTTTAACTCCCCCC	5.34e-05	NA		II			GACACAACTTTTTTTCTTTTATGCAAAAAGTAGGGGTGGAAAGAAAAAAGATGCGGGGGG[CG]GGGGGAGTTAAAAAAATTTCTGAGAAAACTCGGAACTTGCGCTCCAGGAACGACTGCGCA	37	1	91182989	CCTGGAGCGCAAGTTCCGAGTTTTCTCAGAAATTTTTTTAACTCCCCCCG	1	90955577	F			NA	NA	BARHL2	NM_020063	TSS200	chr1:91183240-91184540	N_Shore			NA				NA
cg00010853	58791383	58791383	58791383	ACTAAATCCTAAAAAAACTCCAAAACRAAATCTAAAACTAACAAAATCTC	0.000195124	NA		II			TAGGCAGATTCCCCTGGGCTCAGTCTACTTTCCACCTCTTTTCTCCTGGGGCTTTGCTCT[CG]AGACTCTGCTAGTCTCAGACTCCGCTCTGGAGTTTCTCCAGGACTCAGCCTCCATTTCCA	37	6	30653167	CTGAGTCCTGGAGAAACTCCAGAGCGGAGTCTGAGACTAGCAGAGTCTCG	6	30761146	F			NA	NA	KIAA1949	NM_001134870;NM_133471	Body;1stExon	chr6:30654392-30654934	N_Shore		RDMR	NA		6:30652289-30655443	Promoter_Associated	NA
cg00010946	36695348	36695348	36695348	TCATCACAACATCAACAACAAAACCTTCCTTTTTAAACCTCTCCTACTTC	0.00132979	NA		II			AATAATTATCATCATGTTTTTAAGGGGTTGCTGAGCCTCTGGAGATCTCAGTGCACAGAG[CG]AAGCAGGAGAGGCTTAAAAAGGAAGGCTCTGCTGCTGATGCTGTGATGACCAAGGCAGCC	37	3	157819282	CATCACAGCATCAGCAGCAGAGCCTTCCTTTTTAAGCCTCTCCTGCTTCG	3	159301976	F			NA	NA	SHOX2	NM_001163678;NM_006884;NM_003030	Body;Body;Body	chr3:157821232-157821604	N_Shore			NA		3:157819161-157819921	Unclassified_Cell_type_specific	NA
cg00011482	72689476	72689476	72689476	AACTCTTCCTACRCTCTTAAAAATACCAAAAACACCCAATACCTACAACC	5.99e-07	NA		II			CACCTAAAATTGACTCTTCCTGCGCTCTTGAGAATGCCAAGAGCACCCAGTACCTGCAAC[CG]CCGGCATGAGTGGGGCCTGCGGGGAGCCGCCAGAGCTGCGGACAGGCCCCCTGCCCACTG	37	14	37128790	ACTCTTCCTGCGCTCTTGAGAATGCCAAGAGCACCCAGTACCTGCAACCG	14	36198541	R			NA	NA	PAX9	NM_006194	5'UTR	chr14:37126786-37128274	S_Shore		RDMR	NA	14:36198176-36198571			NA
cg00011754	63690419	63690419	63690419	TTCATATACATCACCTAAAAACCCTCTTAACATACAACTTTTAATTTAAC	8.56e-09	NA		II			GCAGCATCTGCATCACCCGGAGCTTGTCAGACACGCAGATGCTCGGGCCCCGCCCAGGCC[CG]CCAAATCAAAAGCTGCATGTTAAGAGGGTCCTCAGGTGATGCATATGAAGTTTGAGGAGC	37	3	14584788	TCATATGCATCACCTGAGGACCCTCTTAACATGCAGCTTTTGATTTGGCG	3	14559792	F			NA	NA	GRIP2	NM_001080423	TSS1500					NA				NA
cg00012148	69806389	69806389	69806389	AAAATACATTAACTATTACATACCTCTCAAAAAATCTAAATTCTTAAATC	0.0156945	NA		II			GCACCTTGCCAGTGGTTATTACAGCCATAATCTGGGCCATGTATATTCTAAGGAGGCTTT[CG]ATTTAAGAACCTAGATTTTTTGAGAGGCATGCAATAGTCAATGTATCTCTATGCATAAGA	37	6	54172997	AGATACATTGACTATTGCATGCCTCTCAAAAAATCTAGGTTCTTAAATCG	6	54280956	F			NA	NA	TINAG	NM_014464	TSS1500					NA				NA
cg00012529	49790414	63777415	49790414	AAAAATACTACATACAAAACCAAAACCTCACTTCCCAAATTCCAATTCCA	0.000195929	63777415	AAAAATACTACGTACAAAACCGAAACCTCACTTCCCGAATTCCGATTCCG	I	C	Grn	AGAACGCCCGGGGAGGGTGCTGCGTGCAGAGCCGGGACCTCACTTCCCGGGTTCCGATTC[CG]CCTCGAGGACGCGGGTGCGGCAGACACGGCCCAGAGCCCTCGAGGGCCACGAGGCACAGA	37	12	132896897	GAGGGTGCTGCGTGCAGAGCCGGGACCTCACTTCCCGGGTTCCGATTCCG	12	131406970	R			NA	NA	GALNT9	NM_001122636	Body	chr12:132896299-132896569	S_Shore			NA	12:131406914-131407044			TRUE
cg00012576	36605459	36605459	36605459	AATAAACCACCAAAAAACTAAACAAATCCCTCTAAAAACTACCTACTCCC	4.18e-06	NA		II			TCTGTGGACCTCTCCAGGAAGTGTTTTCCCTGGGAGTCCTTCCCTAGAAGCCCAGCATCA[CG]GGAGTAGGCAGCCTTCAGAGGGACCTGCTCAGTTTCTTGGTGGCTCACTTTGACACAGTA	37	13	94568320	CGGGAGTAGGCAGCCTTCAGAGGGACCTGCTCAGTTTCTTGGTGGCTCAC	13	93366321	F			NA	NA	GPC6	NM_005708	Body					TRUE				NA
cg00012638	63625403	63625403	63625403	TCCTAATACTAAAACTACCTACCATTACCCTTACAAAAATAATAAACTTC	0.00910288	NA		II			CATTTACTGTTATTATAATCACCATCATAGCCATCTCCCTGGGCCCAGGCTGCTTGTAGT[CG]AAGTTCACCACCTTTGCAAGGGTAATGGCAGGCAGCCTCAGCACCAGGACCCAGCAGTCG	37	6	39280541	CCTGGTGCTGAGGCTGCCTGCCATTACCCTTGCAAAGGTGGTGAACTTCG	6	39388519	F			NA	NA	KCNK17	NM_031460;NM_001135111	Body;Body	chr6:39281135-39282215	N_Shore			NA				NA
cg00012698	27724427	27724427	27724427	CATACTTATAAACTAACTAATCCTAAAAAACAACCTTATACCCACCTACC	0.00384181	NA		II			CTAGCTTGAGACATGCTTGTAAACTGGCTGGTCCTGAAGGACAGCCTTATGCCCACCTGC[CG]TTAGAAGGCAACCAAGATTTGCTTCAGGCACTTTTTTTCCCCTTTTTAGGAAATCATGCT	37	15	34158767	CGGCAGGTGGGCATAAGGCTGTCCTTCAGGACCAGCCAGTTTACAAGCAT	15	31946059	R			NA	NA	AVEN	NM_020371	3'UTR					TRUE				NA
cg00012762	69649432	40807346	69649432	CAAACCAATAAAAAACTACAAACCTAAACACTCCAACCAAATAAACAACA	8.91e-06	40807346	CGAACCAATAAAAAACTACAAACCTAAACGCTCCGACCGAATAAACGACG	I	C	Grn	CGCCCGCCGCGGGGCGCCGCGCCGAGCGCAGGCCCCGCCCCGCGCGTTCCCAATGGCCGG[CG]CCGTTCACCCGGCCGGAGCGCCCAGGCCTGCAGCCCCCTATTGGCCCGCGGAGGTCCCCA	37	17	72744649	CGGGCCAATAGGGGGCTGCAGGCCTGGGCGCTCCGGCCGGGTGAACGGCG	17	70256244	F			NA	NA	SLC9A3R1	NM_004252	TSS200	chr17:72744428-72745952	Island			NA	17:70256031-70257537	17:72744331-72746086	Promoter_Associated	NA
cg00012920	30771417	30771417	30771417	AATAAATTCATACAACTTCTCAAAAAATAACCAAACRTAATCCTCAAAAC	4.61e-05	NA		II			CTCGGCAGTCACCCGCCAGCGTTCCTGTAGGGCCCAGGGCAGGACTGAGAGCGTGGTTCC[CG]CCCTGAGGATCACGCCTGGCCACTCCCTGAGAAGCTGCATGAACCCACCAGTGTCTCCCA	37	17	73911257	CGCCCTGAGGATCACGCCTGGCCACTCCCTGAGAAGCTGCATGAACCCAC	17	71422852	F			NA	NA	FBF1	NM_001080542	Body	chr17:73910088-73910350	S_Shore			NA				NA
cg00013006	42677319	42677319	42677319	ACTCACCTTTTCTTATACTACTTTCTTTCTCTCTTCATTATTAACTTTAC	7.06e-05	NA		II			AAATTATTATTTCTGTGTGGGAAAGCTGAATAAGGTGATACTTAAAATTGAGTAGTTTAT[CG]TAAAGTTAATAATGAAGAGAGAAAGAAAGTAGCATAAGAAAAGGTGAGTGTACAGATCAA	37	11	4389856	CGTAAAGTTAATAATGAAGAGAGAAAGAAAGTAGCATAAGAAAAGGTGAG	11	4346432	F			NA	NA	OR52B4	NM_001005161	TSS1500					NA				NA
cg00013349	14769377	14769377	14769377	CRCTATATAATACCAAAAACTCATCTTTACAAAAACTATATACTTAAAAC	9.05e-06	NA		II			AGAGTGCCTGCCGCTGTATAATGCCAGGAACTCATCTTTACAGGAACTATGTGCTTAGGA[CG]CTGTGTGATGCAGATATACTAGCTACTCTTTCTTTTTCAGAAATGAGTGTCCCACACCAC	37	1	77049380	GCTGTATAATGCCAGGAACTCATCTTTACAGGAACTATGTGCTTAGGACG	1	76821968	R			NA	NA	ST6GALNAC3	NM_152996	Body					TRUE				NA
cg00013374	66779377	66779377	66779377	CRACCATTTAAATCAACCCCTAACCCTAAAAATCCRTAAAACTTAAAAAC	8.66e-08	NA		II			AGGTTCCTTCCCGGCCATTTGGGTCAGCCCCTAGCCCTGGGGATCCGTGGGGCTTGAGGA[CG]GGCGGTAGAAGCTAGAGGGTGAGCTGGTGAAGGTGCCTTCTCAACTCTGATCCTGACGCC	37	7	100730520	GGCCATTTGGGTCAGCCCCTAGCCCTGGGGATCCGTGGGGCTTGAGGACG	7	100517240	R			NA	NA	TRIM56	NM_030961	5'UTR	chr7:100732088-100732424	N_Shore			NA				NA
cg00013451	14785440	14785440	14785440	CAAACAAACCAAATCTTACCTTAAATCAACTTCTAAAAAATATAAAAAAC	0.00438804	NA		II			AGGGACAGCATCAAACAAGCCAGGTCTTACCTTAGATCAGCTTCTGGAAAGTATAGAGAG[CG]CTTTGAAGCATGCCAACATTCAAGCCTTTCCTCCCCTCTCACCCCTCCCCCTCCAAGAGG	37	8	23711589	CGCTCTCTATACTTTCCAGAAGCTGATCTAAGGTAAGACCTGGCTTGTTT	8	23767534	R			NA	NA	STC1	NM_003155	Body					NA		8:23710894-23712143	Unclassified_Cell_type_specific	TRUE
cg00013543	22690482	15696352	22690482	ACCACATCCAACTAATTTTATATTTTCAATAAAAATAAAATTTCTCCACA	0.000679032	15696352	ACCACGTCCGACTAATTTTATATTTTCAATAAAAATAAAATTTCTCCACG	I	T	Red	CAGGCATGTGCCACCACGTCCGGCTAATTTTGTATTTTCAGTAGAGATGGGGTTTCTCCA[CG]TTAGTCAGGTTGGTCTTGAACTCCCGACCTCAGGTGATCCGCCCGCCTCGGCCTCCCCAA	37	6	32042658	CGTGGAGAAACCCCATCTCTACTGAAAATACAAAATTAGCCGGACGTGGT	6	32150636	R			NA	NA	TNXB	NM_019105	Body					NA				NA
cg00013569	31631371	22722311	31631371	AAAAAAACCAAAATCTAAAATACATCCACCAACTACCAAAAATAACACCA	0.0284388	22722311	AAAAAAACCGAAATCTAAAATACATCCACCAACTACCGAAAATAACGCCG	I	A	Red	CAGCATTCGCCGAGAGGAACCGGGATCTGAGATGCATCCACCAGCTGCCGGGGGTAACGC[CG]AGCTTCTCCTGGAGAGATTCCGCCGTGTTTCTTTCAGTGCCTTCCTTAAGAAATTTTGCA	37	17	80615692	CGGCGTTACCCCCGGCAGCTGGTGGATGCATCTCAGATCCCGGTTCCTCT	17	78208981	R			NA	NA	RAB40B	NM_006822	3'UTR					NA	17:78208862-78210850			NA
cg00013809	23774497	23774497	23774497	CCAACAACATTAATTAACAACAACTAATCTTTAATAATATTCTAATATCC	0.0070969	NA		II			CCAGTATCACACCAGCAACATTAGTTAACAGCAACTGGTCTTTAATAATGTTCTAGTATC[CG]GTCAGTGCTAAATTCCATTAATTAAAAAAAAAGTCATCTTGTAGTTAATTTGTTTGAATT	37	7	158249711	CAGCAACATTAGTTAACAGCAACTGGTCTTTAATAATGTTCTAGTATCCG	7	157942472	R			NA	NA	PTPRN2	NM_002847;NM_130842;NM_130843	Body;Body;Body	chr7:158250128-158250497	N_Shore			NA				NA
cg00013899	11799446	11799446	11799446	CTATAAATCAAAAACCTATACTTTTCCTTCTAAACRTCTAACRCCCTACC	0.000437931	NA		II			TATTTTTTTCCCTGTAAGTCAGAAACCTGTACTTTTCCTTCTAGGCGTCTGGCGCCCTGC[CG]TATGAGAGTCTCAGCTCTTGCTGGGGTCATTTCTTCCATCTTCCTTTCCTTCTTTCCTCT	37	1	64992433	CGGCAGGGCGCCAGACGCCTAGAAGGAAAAGTACAGGTTTCTGACTTACA	1	64765021	R			NA	NA	CACHD1	NM_020925	Body					TRUE				NA
cg00014104	60648332	60648332	60648332	AATTTAAAAAAATCTATTTCCACAAATCCTCACCAACACAAAATACTATC	0.010578	NA		II			CACAAGATTCAGATTTAAGGAAATCTATTTCCACAAGTCCTCACCAGCACAAAATGCTAT[CG]CTAGTTTGCTCTAATAAAAACTACCATCAGCCGGGCGCGGTGGCTCACGCCTGTAATCCC	37	22	22220367	ATTTAAGGAAATCTATTTCCACAAGTCCTCACCAGCACAAAATGCTATCG	22	20550367	R			NA	NA	MAPK1	NM_138957;NM_002745	Body;Body	chr22:22221055-22222367	N_Shore			NA				NA
cg00014260	21760308	21760308	21760308	AACAACAACACTAAAAACAAAAACATAACCCTAAACTATACTATAAACCC	7.08e-05	NA		II			CTCTGGATCTGAGCTGGAGGCTCTCAGCCTCACTGCCTCAGCCCTGGCCTCTGTCACCCC[CG]GGCCCACAGCACAGCCCAGGGCCATGCTCCTGTTCTCAGTGTTGCTGCTCCTGTCCCTGG	37	8	10383071	CGGGCCCACAGCACAGCCCAGGGCCATGCTCCTGTTCTCAGTGTTGCTGC	8	10420481	F			NA	NA	T-SP1	NM_198464	TSS200					NA				NA
cg00014445	48753494	48753494	48753494	AACTAATAAAAACTAAACCACTAAAACAAACAAATATTAAAACTAAAATC	0.00549504	NA		II			TGGTGGTTTGGTCCTAGTGGGAAGGGCCTCTCACCAGCCTAGAGTGGAAAAGGGAGTTCC[CG]ACTCTAGTCTCAATACCTGTCTGCCCCAGTGGCTCAGCCCTTACTAGTTACACCAGCTAA	37	1	44034053	ACTAGTAAGGGCTGAGCCACTGGGGCAGACAGGTATTGAGACTAGAGTCG	1	43806640	F			NA	NA	PTPRF	NM_002840;NM_130440	Body;Body	chr1:44031286-44031853	S_Shelf			NA				NA
cg00014638	60645365	60645365	60645365	TAACCTAATCCAACCAATATTAAAATAATTTACTATATTAAAAACAAAAC	0.00342896	NA		II			AATTAAACTTAGTGACTTAATTAGTCACTGCCTTGCTAACTTTGCTGTAATTTTTTTAAA[CG]TCTTGTTTTTAATATAGCAAACTATCTCAATACTGGCTGGATTAGGTTAAATAAAGAATT	37	10	94113651	CGTCTTGTTTTTAATATAGCAAACTATCTCAATACTGGCTGGATTAGGTT	10	94103631	F			NA	NA	2019-03-05	NM_017824	3'UTR					TRUE				NA
cg00014900	60684368	60684368	60684368	CTCTATCCTATCCTAACACTAACACAAACTCAACACATACCCAATAATAC	1.37e-10	NA		II			ATAGGATCCGTCTCTGTCCTGTCCTGGCACTGGCACAAGCTCAGCACATGCCCAGTAATG[CG]TGTTGTTTGGCTGATGGAATAAAGGGCTTAGGGACTTCCCTGAGGCCTCTGGACCCATCT	37	1	44438411	CGCATTACTGGGCATGTGCTGAGCTTGTGCCAGTGCCAGGACAGGACAGA	1	44210998	R			NA	NA	DPH2	NM_001039589;NM_001384	3'UTR;3'UTR	chr1:44440142-44441256	N_Shore			NA				NA
cg00015319	58621401	58621401	58621401	TTAAAACCCTTTACRATCRTCAACAACATAAAAAATACTACAAATAAAAC	0.0118585	NA		II			CCGCCTCCCACTCAGCGTTAATTAAAACTTGCGAGATGGAGAGGCTGGCGCGGACGGCTC[CG]TTTTATTTGCAGCATCTTTCATGCTGCTGACGATCGTAAAGGGCTTTAATATTGAAATAT	37	12	54500832	TAAAGCCCTTTACGATCGTCAGCAGCATGAAAGATGCTGCAAATAAAACG	12	52787099	F			NA	NA	FLJ12825	NR_026655	Body	chr12:54500127-54501158	Island			NA	12:52786400-52787425			NA
cg00015343	71691503	71691503	71691503	ACTTCACTCTTATCCTCACCCCTAAACATTTACTCATAAATAAAAACAAC	0.00975874	NA		II			GGAGAAGGGTGGCTTCACTCTTGTCCTCACCCCTAGACATTTACTCATGGGTGAGGGCAA[CG]GGGCCACCTTGGTGCAGGAAGTGAGTGTTGATGGATGGCAGGGAGTGAGCCCTTCAAGGA	37	11	44786266	CTTCACTCTTGTCCTCACCCCTAGACATTTACTCATGGGTGAGGGCAACG	11	44742842	R			NA	NA	TSPAN18	NM_130783	5'UTR					NA				NA
cg00015572	18653486	58624417	18653486	ACAATACAACCACAAACTAAAAAACCTCTTAAACACAACCAAAATAAACA	0.0122259	58624417	ACAATACAACCGCGAACTAAAAAACCTCTTAAACGCGACCAAAATAAACG	I	C	Grn	TGACAACATGCTAGCAGCCCTCACAGCCTTTGCTCGCTCTCCGCGCCTCCTCGGCCTTGG[CG]CCCACTCTGGTCGCGCTTAAGAGGCCCTTCAGCCCGCGGCTGCACTGTGGGAGCCCCCTT	37	6	28479502	CGCCCACTCTGGTCGCGCTTAAGAGGCCCTTCAGCCCGCGGCTGCACTGT	6	28587481	F			NA	NA	GPX6	NM_182701	Body					NA	6:28587409-28587969			NA
cg00016481	60758450	35703302	60758450	TTAACTCCAACCACAATTCAACAACTAATAACACAACAAAAACTTAATCA	0.0249265	35703302	TTAACTCCGACCACGATTCGACAACTAATAACACAACAAAAACTTAATCG	I	T	Red	GAGAAAGATTACTTGGCTCCGACCACGGTTCGGCAGCTGATGGCACAGCAAGAACTTGAT[CG]TATAAAGAAAGCTTCAGACGTGCTGGGCTTGACGGTACAGCAGCCAGGCATGATGGACAG	37	8	77768353	CGATCAAGTTCTTGCTGTGCCATCAGCTGCCGAACCGTGGTCGGAGCCAA	8	77930908	R			NA	NA	ZFHX4	NM_024721	Body					NA	8:77930748-77930943			NA
cg00016783	43800501	43800501	43800501	CTCCTCCTAATATAATAATCAATAACAATACCCCACAACTACTATAAACC	0.000440728	NA		II			GAAGGCAGAGCCTCCTCCTGATGTGGTAGTCAATGGCAGTGCCCCACAGCTGCTGTGAGC[CG]TAGAAGGAAAGTCGGAAGCAGCTGCGTTAATAGCACACTGAGCCCACCCACTCCTCAGCA	37	2	8936684	CGGCTCACAGCAGCTGTGGGGCACTGCCATTGACTACCACATCAGGAGGA	2	8854135	R			NA	NA	KIDINS220	NM_020738	Body					TRUE				NA
cg00016814	11616352	11616352	11616352	AACCTCCAATTTTAAAACTAAAAAAACCATATTATAAAAATTTCATAATC	0.00363593	NA		II			TAAATTTTAGAAGCCTCCAATTTTAGAACTAAAAGAACCATATTGTAGAGATTTCATGAT[CG]CCAAGTTTAATCCTTCCTCTTACCTATGAGAATGCCTGTAGGTTGCTTGTATTTTATTTT	37	7	145875026	GCCTCCAATTTTAGAACTAAAAGAACCATATTGTAGAGATTTCATGATCG	7	145505959	R			NA	NA	CNTNAP2	NM_014141	Body					TRUE				NA
cg00016968	30804370	30804370	30804370	TTCTAAATCCCAACTATAAATTCTATTCCCACTCCTAAATCTAACTTAAC	0.00170691	NA		II			CCTAGAAATGCTTCTGGATCCCAGCTGTGAATTCTGTTCCCACTCCTAGGTCTGACTTGG[CG]CATAGGATATTTACCTACACGCGTATCTCCTTTCCCTGTAAGGGAGCTGAGGAGGTGGGA	37	1	113250448	CGCCAAGTCAGACCTAGGAGTGGGAACAGAATTCACAGCTGGGATCCAGA	1	113051971	R			NA	TRUE	RHOC	NM_001042679;NM_175744;NM_001042678	TSS1500;TSS1500;TSS1500	chr1:113249342-113250198	S_Shore			NA				NA
cg00017489	16683355	16683355	16683355	TTTTTCAAATAACTTAAATAAATCTACATATAAATTTAACCAACCTCTAC	8.44e-06	NA		II			TCTGAATCTGGTTTTTCAAGTGGCTTGGGTGGGTCTGCATATGAATTTGACCAACCTCTG[CG]CGCGCTCCTGGGAGCGCGCATCTGTGTGTGGTCCAGGGAGCCAACCGCGTTTGTGAATGG	37	7	153583318	TTTTCAAGTGGCTTGGGTGGGTCTGCATATGAATTTGACCAACCTCTGCG	7	153214251	R			NA	NA	DPP6	NM_001039350	TSS1500	chr7:153583317-153585666	Island		RDMR	NA	7:153214251-153215390			NA
cg00017546	72607441	72607441	72607441	CATCTTTAACTCACACCCTCTTTCTTTCTCTCATACCCTCCATTAAATCC	0.0016676	NA		II			CTAGGTTGAAGTGACCAGATGAGTGAGAAGTGATTGCATTCTGCATTTATTTCAAAAATA[CG]GATTCAATGGAGGGTATGAGAGAAAGAAAGAGGGTGTGAGTCAAAGATGATTTTCTGGTT	37	1	28659475	CGGATTCAATGGAGGGTATGAGAGAAAGAAAGAGGGTGTGAGTCAAAGAT	1	28532062	F			NA	NA	MED18	NM_017638;NM_001127350	Body;Body	chr1:28655365-28655667	S_Shelf			NA				NA
cg00017970	26713483	26713483	26713483	AACATCTTAACAAAACTAATCAAAACAATACCCCATAAATAACCAACCAC	0.000187011	NA		II			CCCCTGACCTTCCTCTCTCCCTGCAGGTCAGTGAGAGCCCAAGCCAATTGCTCTAGGCCC[CG]TGGCTGGCTACTTATGGGGCACTGTCCTGACCAGCTCTGCTAAGATGCTCCTGGCCCCTC	37	1	26487737	GCATCTTAGCAGAGCTGGTCAGGACAGTGCCCCATAAGTAGCCAGCCACG	1	26360324	F			NA	NA	GRRP1	NM_024869	5'UTR	chr1:26487807-26488606	N_Shore			NA				TRUE
cg00018044	64638355	64638355	64638355	AACAAAACAAATACCRAATCATCCATACTTTACTTCCAAATATTCTATAC	0.00296557	NA		II			TTCTGAGGAATAACAAAGCAGATACCGAGTCATCCATACTTTGCTTCCAAGTATTCTATA[CG]TTTTTATAAACCTCTTTGAGATTTGTTAACAGCCTAGGTGTGCCAAGTTGCCATTTATTT	37	18	19109496	CGTATAGAATACTTGGAAGCAAAGTATGGATGACTCGGTATCTGCTTTGT	18	17363494	R			NA	NA	ESCO1	NM_052911	3'UTR					NA				NA
cg00018184	20643446	20643446	20643446	CCAAACTAATACCAATTTTTTATTAAAAATTAAATAAACCCTTTCCCATC	0.0138432	NA		II			ACCAAACAAAACCAAGCTGATGCCAGTTTTTTATTAGGAGTTAAATAGGCCCTTTCCCAT[CG]TGGTCTCATTGGTGCACGCTCTGCTGAGCCTCGAGGGCCTCAGAGCAGATCCCGCCTCCT	37	1	153519850	CAAGCTGATGCCAGTTTTTTATTAGGAGTTAAATAGGCCCTTTCCCATCG	1	151786474	R			NA	NA	S100A3	NM_002960	3'UTR					NA				NA
cg00018606	36798411	36798411	36798411	ATTACCRTTTTACAAACATTCTCAATAACATCAACCAATAATAACAATCC	0.0106525	NA		II			TTTGCTGTGCTAGACCACGGGGCTTGTTGTGGGTTTTGGTCGCATTCTCTCTGGAGTATT[CG]GATTGCTATCACTGGCTGATGCTATTGAGAATGTTTGTAAAACGGCAATTTGGGACATTG	37	2	208989425	CGGATTGCTATCACTGGCTGATGCTATTGAGAATGTTTGTAAAACGGCAA	2	208697670	F			NA	NA	CRYGD	NM_006891	TSS200	chr2:208988834-208989269	S_Shore			NA				NA
cg00018896	48734460	48734460	48734460	ACTCRCTAATTAAACACAACTCRTACACTTACCATTCTCTACATATACTC	7.35e-05	NA		II			AAAGCCATTGTATGTAGCTTTAGCTCAGCGCAAAGAAGAGCGCCAGGCTTACCTCACTAA[CG]AGTATATGCAGAGAATGGCAAGTGTACGAGCTGTGCCCAACCAGCGAGCACCTCCTTCAG	37	13	25671476	CGAGTATATGCAGAGAATGGCAAGTGTACGAGCTGTGCCCAACCAGCGAG	13	24569476	F			NA	NA	PABPC3	NM_030979	1stExon	chr13:25670041-25670531	S_Shore			NA	13:24569444-24569892			NA
cg00019076	68704328	68704328	68704328	AATTCTAAAACATTTAAATCACCCCTAAAAAAACCTCRATTACATTTACC	0.00657724	NA		II			TGTGACCATCTAATTCTAGAACATTTGGGTCACCCCTAAGAGAACCTCGGTTGCATTTGC[CG]TCAGCTCCCACGCCCTCCCCCAGCCCCCGGCGGCCGCTGTCTGCTTTCTGCCTCTGTAGA	37	16	85670772	CGGCAAATGCAACCGAGGTTCTCTTAGGGGTGACCCAAATGTTCTAGAAT	16	84228273	R			NA	NA	KIAA0182	NM_001134473;NM_014615	5'UTR;Body	chr16:85670134-85670349	S_Shore			NA	16:84228273-84228833			NA
cg00019082	72774444	72774444	72774444	AAAACAATCCCCTCTAACTTATAAAATTACATCAAAACTCAACTATAATC	0.0074456	NA		II			AACAACATCCATGAGTGGAGTTCTCTCTCTTAACCAGGTTGGCGAAAAGCACTCTTGCAG[CG]ATTACAGCTGAGTTTTGATGCAACTCTACAAGCCAGAGGGGATTGCCCCCATTTTATACA	37	3	11057500	GGGCAATCCCCTCTGGCTTGTAGAGTTGCATCAAAACTCAGCTGTAATCG	3	11032500	F			NA	NA	SLC6A1	NM_003042	5'UTR	chr3:11058818-11059051	N_Shore			NA				NA
cg00019196	58698457	58698457	58698457	TAATTAACTTAATTTAACATAAAAACCTTTCTTAATACCCTAACAAAAAC	0.000118612	NA		II			TCTCCATTTATTAATTGACTTAATTTAACATGAGAGCCTTTCTTAATGCCCTGGCAAGAA[CG]TAAAGCGTTTAAGCCGCCAAATAGTACAACACCCCGCTCCAAAGTAGGCAGATGGATAAC	37	13	46426202	CGTTCTTGCCAGGGCATTAAGAAAGGCTCTCATGTTAAATTAAGTCAATT	13	45324203	R			NA	NA	SIAH3	NM_198849	TSS1500				CDMR	NA				NA
cg00019275	57670324	57670324	57670324	ACATTCACTAATTCAATATACACAAAAAATTCACAAAACCTAACTACCAC	2.22e-07	NA		II			ACAATCATTCAGCATTCACTAATTCAGTGTGCACAGAAAATTCACAGAACCTAACTACCA[CG]AGTAACAATTCACTGCATATAAATGTACATGTGTACATGTGCACATGTGTTAAGTATTTC	37	19	35249217	CGTGGTAGTTAGGTTCTGTGAATTTTCTGTGCACACTGAATTAGTGAATG	19	39941057	R			NA	NA	ZNF599	NM_001007248	3'UTR					NA				NA
cg00019463	66754461	66754461	66754461	ATAATCACCAAAAAAAATTAAATAATAAACTTTATAACACCTTTCAATTC	0.00989245	NA		II			ATGTTGAACGCATAATCACCAAAGAAAATTAAATAATGAGCTTTGTGACACCTTTCAGTT[CG]CCAACAGACTGATAAAACCAGTACAAAGGGGGAGGGCCGGGACCGAGGGGGCGGGACGGT	37	15	59279703	TAATCACCAAAGAAAATTAAATAATGAGCTTTGTGACACCTTTCAGTTCG	15	57066995	R			NA	NA	RNF111	NM_017610	TSS200	chr15:59279741-59280720	N_Shore			NA		15:59279251-59281230	Promoter_Associated	NA
cg00019838	59808405	59808405	59808405	TTTACAATATTTAAATCCTTTAATCAAACAATTCCACRCACAAAAATAAC	0.000862158	NA		II			ATCAAAACCTTTTTACAATGTTTAGATCCTTTAATCAAGCAATTCCACGCACAGGAATAG[CG]GCTGACGACAATCAGGCAGGTGGGAAGCAGGCTTACTAGAGGCTCAAAATGGTGTTTTTC	37	16	6571083	TTACAATGTTTAGATCCTTTAATCAAGCAATTCCACGCACAGGAATAGCG	16	6511084	R			NA	NA	A2BP1	NM_001142333;NM_018723	5'UTR;5'UTR					TRUE				NA
cg00019841	38644401	16644325	38644401	TCTACACAAAATCACCAAAATACTCAAAAATACACACACCATTAAAATCA	0.0117566	16644325	TCTACACGAAATCGCCAAAATACTCGAAAATACACGCACCATTAAAATCG	I	C	Grn	CATCTCCCGCGCCCTGAAGCTCTGCACCAAGCCCGAGGACCTGCCGGACAATAAACTGGG[CG]ACCTCAATGGTGCGTGCATCCCCGAGCACCCTGGCGACCTCGTGCAGACCGAGGCCTTCT	37	18	48256146	TCTGCACGAGGTCGCCAGGGTGCTCGGGGATGCACGCACCATTGAGGTCG	18	46510144	F			NA	NA	MAPK4	NM_002747	Body	chr18:48255544-48256359	Island			NA	18:46509543-46510305			NA
cg00019877	12741332	12741332	12741332	TAACAAACCAAAAACAAAACTAACTTTATCCTCCCATAATAAATAACACC	6.45e-06	NA		II			CTGGTCCAATCTGACAAACCAGAAACAGGGCTAACTTTATCCTCCCATGATGGGTGGCAC[CG]AGTGCACCAGCTCCCTCTTTGTTTGTTAACAATACTTGTAAAGCATATACAATTTTTCGA	37	9	115773738	CGGTGCCACCCATCATGGGAGGATAAAGTTAGCCCTGTTTCTGGTTTGTC	9	114813559	R			NA	NA	LOC169834	NM_001101338	5'UTR	chr9:115774295-115774615	N_Shore			TRUE				NA
cg00020052	41697507	41697507	41697507	CTAAAAAAAACCTAAATATCCRCTTCCCCAACTAAAAAAAATTATAATAC	0.0244945	NA		II			TGGCCCGCAGGCCGCCGCGCAGATCCGCGCAGCTGGGGGCGAGGGAGTTAATCCTGTTTA[CG]CACCACAATCCCCTTCAGCTGGGGAAGCGGACATTTAGGCTCCTCCTAGAACAGCCCCGG	37	2	68546899	CGCACCACAATCCCCTTCAGCTGGGGAAGCGGACATTTAGGCTCCTCCTA	2	68400403	F			NA	NA	CNRIP1	NM_001111101;NM_015463;NM_015463;NM_001111101	1stExon;1stExon;5'UTR;5'UTR	chr2:68546339-68547111	Island		DMR	NA	2:68399643-68400748	2:68546717-68546927	Unclassified	TRUE
cg00020348	48768334	48768334	48768334	ATAAACTACAAACCCTTCTATATAACCCCTTCCTCATACTTTATCTTCTC	7.23e-05	NA		II			CTCCTCCTTTGGTGAGCTGCAGGCCCTTCTGTATGGCCCCTTCCTCATGCTTTATCTTCT[CG]CCTTCATGGGAAACACCATCATCATAGTTATGGTCATAGCTGACACCCACCTACATACAC	37	7	142749542	TGAGCTGCAGGCCCTTCTGTATGGCCCCTTCCTCATGCTTTATCTTCTCG	7	142459664	R			NA	NA	OR6V1	NM_001001667	1stExon					NA				NA
cg00020390	71755309	71755309	71755309	AATTCTTTTATCTTTTTTAATAAAATACAAACTTCTCTACCAACACTCTC	0.0110543	NA		II			TCTCCTGCAATGATTCTTTTGTCTTTTTTGATAAAATGCAGGCTTCTCTGCCAACACTCT[CG]TATCCTCTCCACACACATCATCCTAAATGGGGATGTACCCTTGCTGCTCCCAGTACCTGG	37	7	100727888	CGAGAGTGTTGGCAGAGAAGCCTGCATTTTATCAAAAAAGACAAAAGAAT	7	100514608	R			NA	NA	TRIM56	NM_030961	TSS1500					NA				NA
cg00020419	25764337	25764337	25764337	ATATAAACTACTACATCTATAACCCAATAAAAATAAAATTCAAATAAAAC	0.0303733	NA		II			TTCCATTGGACCATGAGGGGCATGATGGGAGGCCTGAGTTAGGGTGACCTTTTTTGTGAG[CG]TCTCATTTGAATTTTATCTTCACTGGGTCATAGATGTAGCAGCCCACATCGCCAATGTTC	37	6	43273548	TGTGGGCTGCTACATCTATGACCCAGTGAAGATAAAATTCAAATGAGACG	6	43381526	F			NA	NA	CRIP3	NM_206922	3'UTR	chr6:43276419-43276659	N_Shelf			NA				NA
cg00021237	71794422	10702499	71794422	AATTCACTCACCCTAAAAATTTTAAAACAACTAAACTTCTCCACCACCCA	0.00601582	10702499	GATTCGCTCACCCTAAAAATTTTAAAACAACTAAACTTCTCCACCGCCCG	I	C	Grn	GCGAGTTCCTGCGCTCGCCGAGGAGTGGGTCCGGAAGCGGCGCCGGAGCGGGTCCGGAAG[CG]GGCGGTGGAGAAGTCCAGTTGCCCCAAAATTCTTAGGGTGAGCGAACCGAGTTTCTGGCG	37	8	67525849	CGGGCGGTGGAGAAGTCCAGTTGCCCCAAAATTCTTAGGGTGAGCGAACC	8	67688403	F			NA	NA	MYBL1	NM_001080416;NM_001144755	TSS1500;TSS1500	chr8:67524607-67526059	Island			NA	8:67687200-67688548	8:67525019-67526496	Promoter_Associated	NA
cg00021256	61778449	61778449	61778449	CRCCAACCTCRTTTTTATAATTTCTATCTCTTAATAAAATCTAAAATAAC	0.00834123	NA		II			GATAAAACAGTCGCCAACCTCGTTTTTGTGGTTTCTGTCTCTTGGTGAGATCTAGGGTAA[CG]ACTGAGATGGGGACTGTGGGGAGACGCTGCTTGAAGAGCCAGCCGTCAAAAGGGTAATTT	37	2	219848373	GCCAACCTCGTTTTTGTGGTTTCTGTCTCTTGGTGAGATCTAGGGTAACG	2	219556617	R			NA	NA	FEV	NM_017521	Body	chr2:219848919-219850541	N_Shore		CDMR	TRUE	2:219556516-219556776	2:219848156-219848892	Unclassified_Cell_type_specific	TRUE
cg00021978	47614478	47614478	47614478	ACATTTTAAATATAAATATACACACACAAACACATACACAATATAATATC	3.07e-05	NA		II			TGCAAGTTCTGACATTTTAAATATAGGTGTACACACACAGACACATGCACAATATGATAT[CG]ATTATGTAAAATAGAGCATGCTAAAAAGCATAAAGGCAATACACCAAAACATTGGCTGTC	37	8	105476917	CGATATCATATTGTGCATGTGTCTGTGTGTGTACACCTATATTTAAAATG	8	105546093	R			NA	NA	DPYS	NM_001385	Body	chr8:105478672-105479340	N_Shore			TRUE				NA
cg00022558	29769508	29769508	29769508	AAACCRAACRAAACCAAAAATAAAAACCRAAATCCCTCCAAATAACACTC	0.0145919	NA		II			GGTCGCAGGCCGCCTGCCAATCAGGGCCGGGGGAAGGGAGGAGGCTGGGGACTAGCGCCG[CG]AGTGCCACCTGGAGGGACCCCGGCCCCCACCCTTGGCTCCGCCCGGCCCACGGACCTGTT	37	11	69590287	GGCCGGGCGGAGCCAAGGGTGGGGGCCGGGGTCCCTCCAGGTGGCACTCG	11	69299468	F			NA	NA	FGF4	NM_002007	TSS200	chr11:69588826-69590546	Island		DMR	NA	11:69298008-69299692			NA
cg00022633	33715376	33715376	33715376	RTACACCTCTTTAATCAAATTTATAACTAAAATCAAACTCTAATTAAATC	0.0170171	NA		II			CTCCTTCCCACGTGCACCTCTTTGATCAAGTTTGTGGCTGAAATCAGACTCTAGTTAGAT[CG]CTGTAAAAATAAAAATAAATTTTCCCCAAATGATTGAAACGAATTTCACCCTAGACTACG	37	13	26827877	TGCACCTCTTTGATCAAGTTTGTGGCTGAAATCAGACTCTAGTTAGATCG	13	25725877	R			NA	NA	CDK8	NM_001260	TSS1500	chr13:26827936-26829103	N_Shore			NA		13:26827792-26827910	Promoter_Associated	NA
cg00022688	73648337	73648337	73648337	CAAAAAATAAAATCCCCRAACACRTTAAAAAACCTAACATAACCTAACTC	0.0141364	NA		II			AAAATTAAAACCAGGAAGTGAAGTCCCCGAGCACGTTAGAAAGCCTGACATGGCCTGACT[CG]GGACAGCTCAGAGCAGGGCAGAACTGGGGACACTCTGGGCCGGCCTTCTGCCTGCATGGA	37	10	114136011	AGGAAGTGAAGTCCCCGAGCACGTTAGAAAGCCTGACATGGCCTGACTCG	10	114126001	R			NA	NA	ACSL5	NM_016234;NM_203379;NM_016234;NM_203380	5'UTR;5'UTR;1stExon;5'UTR			low-CpG:114125830-114126134		TRUE		10:114134365-114136516	Promoter_Associated	NA
cg00022871	58660493	58660493	58660493	TAATAAAACAACATACTCATAACTCATAACACCTACCTAATATATCCTTC	0.000884415	NA		II			GTTTTCCTGGGTGATGGAGCAACATGCTCATGGCTCATGGCACCTGCCTAATGTGTCCTT[CG]CCTCCTGTGCCTGCAGGCCCTTCTCCTTCTGGGGCTGAACCCCGTCTCTGCCTCCCTCCA	37	17	43884358	GATGGAGCAACATGCTCATGGCTCATGGCACCTGCCTAATGTGTCCTTCG	17	41240138	R			NA	NA	CRHR1	NM_001145148;NM_004382;NM_001145147;NM_001145146	Body;Body;Body;Body					NA				NA
cg00023185	13784470	16701464	13784470	TAAATCAAAAAATTTCACCATAACCTAATTTCCCACCCTTTCTACCCACA	0.0189086	16701464	TAAATCAAAAAATTTCGCCGTAACCTAATTTCCCACCCTTTCTACCCGCG	I	C	Grn	AGCGGTCATCTGTGAGTCAGAAGATTTCGCCGTGGCCTGATTTCCCACCCTTTCTGCCCG[CG]CAAGCCGAAAGCGCTCATGTTGGCTTTTCCTTTGCCACTTTTCCAACTTGCCAGTTCCAT	37	8	65489939	CGCGGGCAGAAAGGGTGGGAAATCAGGCCACGGCGAAATCTTCTGACTCA	8	65652493	R			NA	NA	LOC401463	NR_015374	TSS200	chr8:65491083-65491319	N_Shore		RDMR	NA	8:65652201-65652766	8:65489740-65490289	Unclassified_Cell_type_specific	NA
cg00025044	69779509	69779509	69779509	ATTCAATTTCCTCCTCCTCCCTCCCTCCTAAAATATACAAACATCTTATC	0.0169874	NA		II			GCATCGACAAGATTCAGTTTCCTCCTCCTCCCTCCCTCCTAAAATATACAGGCATCTTGT[CG]CCACAGAACTCAGCACCTAGGAAACCACATAAGCCACTACAGAAACGATTGCATTCTAGT	37	10	50716478	TTCAGTTTCCTCCTCCTCCCTCCCTCCTAAAATATACAGGCATCTTGTCG	10	50386484	R			NA	NA	ERCC6	NM_000124	Body					TRUE		10:50716315-50716520	Unclassified_Cell_type_specific	NA
cg00025715	35756479	35756479	35756479	CCACTAACTTAACCACAAAATACACRATACAAAAAAAACCTACTCAAAAC	0.00146576	NA		II			TCTCCACCTGGCCACTAGCTTGGCCACAAGATGCACGATGCAAGGAGAGCCTGCTCAGAG[CG]CACCCTCCTGGAGGGAGGGGCCCGGCTGCCAGCGAAGAGAGTGGGGTCAATAGCTAAGGC	37	19	58597097	CACTAGCTTGGCCACAAGATGCACGATGCAAGGAGAGCCTGCTCAGAGCG	19	63288909	R			NA	NA	ZSCAN18	NM_001145542;NM_001145543;NM_023926;NM_001145544	Body;Body;Body;Body	chr19:58595816-58596927	S_Shore			NA				NA
cg00025795	70652340	70652340	70652340	AAAAACTATAAAAATCRAATACAAACCCCCTATACTAACTCTAAAACTCC	6.38e-06	NA		II			GGGGCATAGGAAGGGGCTGTGGAAGTCGGATGCAGGCCCCCTGTGCTGGCTCTGGGGCTC[CG]GGCTTATGCGACCACACGGGCACTCACCCCAAGGCCATGAGGGCCCTCGTGGCACCATGC	37	17	77983156	GGGGCTGTGGAAGTCGGATGCAGGCCCCCTGTGCTGGCTCTGGGGCTCCG	17	75597751	R			NA	NA	TBC1D16	NM_019020	Body	chr17:77983980-77984482	N_Shore			NA		17:77981403-77983388	Unclassified	NA
cg00025991	59707408	59707408	59707408	CAACTACTTCCAATAACTCTTAATCACTAAAAATTCTACTTCTCAAAACC	0.0190658	NA		II			CTAAATGAAGCCAGCTGCTTCCAGTGACTCTTAGTCACTGGAAGTTCTGCTTCTCAGAAC[CG]CCCCCGTTGTCTTCATCATCACCTTCCTCTGTCTCCACACATCCTCCCCAGTCTGTTGCA	37	10	736625	AGCTGCTTCCAGTGACTCTTAGTCACTGGAAGTTCTGCTTCTCAGAACCG	10	726625	R			NA	TRUE	DIP2C	NM_014974	TSS1500	chr10:734707-735606	S_Shore			NA	10:726443-727439			NA
cg00026457	25792469	25792469	25792469	ATACTTAAAACRATCTCCTCTACACRAACRCTAAAACAAAACACATTTTC	0.0181025	NA		II			TCTCCATTGGTGTGCTTAAAGCGATCTCCTCTACACGAACGCTAGGGCAGAGCACATTTT[CG]CACAGGCAGCGCCGCAGCTTGCCCTGGATCTTGTCGATTGAGTTGAAGTCGGACACGTGG	37	1	200116736	TGCTTAAAGCGATCTCCTCTACACGAACGCTAGGGCAGAGCACATTTTCG	1	198383359	R			NA	NA	NR5A2	NM_205860;NM_003822	Body;Body	chr1:200116696-200117204	Island			NA	1:198383334-198383887			NA
cg00027083	59610494	44696489	59610494	AAAAAAAACCCAAAACCTAAAACAAAACACACAAAACAATAAAACTAACA	2.89e-05	44696489	AAAAAAAACCCGAAACCTAAAACGAAACGCGCGAAACAATAAAACTAACG	I	C	Grn	CCCCGGCCGCGCCGGGCGCGGGGCTCGGGATTCGGGAGACCGCGCGGCGCCGAAGCCACG[CG]TCAGCCCCACTGTCCCGCGCGCCTCGCCCCAGGCCTCGGGCTCTTCCTCCGCACCTCGTA	37	18	5543801	AGGAAGAGCCCGAGGCCTGGGGCGAGGCGCGCGGGACAGTGGGGCTGACG	18	5533801	F			NA	TRUE	EPB41L3	NM_012307	5'UTR	chr18:5543437-5544241	Island			NA	18:5532823-5534217	18:5543793-5544104	Unclassified_Cell_type_specific	NA
cg00027400	30772504	30772504	30772504	CATTAATACRCAAACCAAACAAATACAACTCCTAAAAACCTCCTCRATCC	0.00564382	NA		II			GCATCCCTGCGCATTGATACGCAGACCAGGCAAATGCAGCTCCTGGAAGCCTCCTCGGTC[CG]CTCTTTTTTCCCTAAGCCATAGTCTGTCTGCCCCCACCCCCTTCCCGTGGAATCTTTGCC	37	18	49866412	CGGACCGAGGAGGCTTCCAGGAGCTGCATTTGCCTGGTCTGCGTATCAAT	18	48120410	R			NA	NA	DCC	NM_005215	TSS200	chr18:49868377-49868759	N_Shore		DMR	NA	18:48120199-48121532	18:49866199-49866473	Unclassified_Cell_type_specific	NA
cg00027466	17652351	17652351	17652351	ATTATATACTCCCAACCTTTCTAATTCCATTATAACTCTTACCRAAATCC	0.00683676	NA		II			GAAGCCTTGACAACTTGGGCCTGCCCATACCAGTTCTTAAAGAGACTACTTCCGTTCACC[CG]GATTTCGGCAAGAGTTACAATGGAATCAGAAAGGCTGGGAGTATATAACCCCCTACCTGG	37	1	156269048	TTATATACTCCCAGCCTTTCTGATTCCATTGTAACTCTTGCCGAAATCCG	1	154535672	F			NA	NA	VHLL	NM_001004319;NM_001004319	5'UTR;1stExon					NA				NA
cg00027990	12790318	12790318	12790318	AAATATAACAAATACRAAAACTAAAACCCACTAACATCACCACRCTAAAC	0.00787218	NA		II			TGTGCGTCCACAGGTATGACAGGTGCGAGGGCTGGAGCCCACTAGCATCACCACGCTGGG[CG]GGCTCCCGATCCTGGAGCTCAGGGAGTGGCAGACGCTGCAAGCGTGTGCCTGGCAGGACT	37	19	18368368	GGTATGACAGGTGCGAGGGCTGGAGCCCACTAGCATCACCACGCTGGGCG	19	18229368	R			NA	NA	KIAA1683	NM_001145305;NM_025249;NM_001145304	Body;Body;Body	chr19:18368482-18368911	N_Shore			NA	19:18229297-18229996			NA
cg00028034	48739319	48739319	48739319	TAACCAAACAATACAAATCACTTACAATCCAACCAAAAACCTATAAAACC	3.36e-08	NA		II			AAGGTCAAAAATGAAGGGTCAGCCCACTTCCTTTGTACATAAAACACCTGCACTTGTTAA[CG]GCCCCATAGGCTCTTGGCTGGACTGCAAGTGACTTGCACTGCTTGGCCATAGACACTGGC	37	20	30779307	CGGCCCCATAGGCTCTTGGCTGGACTGCAAGTGACTTGCACTGCTTGGCC	20	30242968	F			NA	NA	TSPYL3	NR_002781	TSS1500	chr20:30777756-30778329	S_Shore			NA		20:30779234-30779570	Unclassified	NA
cg00028336	62672385	62672385	62672385	TTTCTTAAAAAACCCTATATATCRACTAAAACRCTATCTACAAAACCTCC	0.00765204	NA		II			GGACAGGGACAGAGGCTAGGGAGCAGCGTGCGCGGACACCTTGCCTGCGGGGAAGGCCTA[CG]GAGGCCTTGCAGACAGCGTCTCAGCCGACACACAGGGCCCTTTAAGAAAAGAGGCACCGT	37	4	186741788	CGGAGGCCTTGCAGACAGCGTCTCAGCCGACACACAGGGCCCTTTAAGAA	4	186978782	F			NA	NA	SORBS2	NM_021069	5'UTR					TRUE	4:186978748-186978894			NA
cg00028487	32645457	32645457	32645457	CAAACAATTCCAAAACTTTAAAATCATACCTCAAACTTTCTAACRCTCTC	0.0098021	NA		II			CATCCCGGTTCCAGACAATTCCAGGGCTTTGGAATCATGCCTCAGACTTTCTGGCGCTCT[CG]CCTCCACAACCTAAAAACAGAGACGCTAGGAGAGAGGCTGAAAGACGCGCAAGTCCCGCC	37	19	53030711	AGACAATTCCAGGGCTTTGGAATCATGCCTCAGACTTTCTGGCGCTCTCG	19	57722523	R			NA	NA	ZNF808	NM_001039886	TSS200	chr19:53030824-53031359	N_Shore		DMR	NA	19:57722417-57722973	19:53030233-53031431	Unclassified	NA
cg00028598	51611503	65715428	51611503	CATCATCCTCCAACCACAACAACTTATTAAACATAATCATATTATAAACA	0.0211421	65715428	CGTCGTCCTCCAACCGCAACAACTTATTAAACGTAATCATATTATAAACG	I	A	Red	CCTCCTTGCCAGCAAGATCTGGACCCCAGACACGTTCTTCCACAACGGGAAGAAGTCCAT[CG]CTCACAACATGACCACGCCCAACAAGCTGCTGCGGCTGGAGGACGACGGCACCCTGCTCT	37	15	27128633	CGCTCACAACATGACCACGCCCAACAAGCTGCTGCGGCTGGAGGACGACG	15	24679726	F			NA	NA	GABRA5	NM_001165037;NM_000810	Body;Body	chr15:27128249-27128935	Island			NA	15:24679233-24680003			NA
cg00028929	50726462	50726462	50726462	CTACTTCAAATCAACCTTCAAATTTCCCACAACATAACCCCTACTAACAC	1.78e-09	NA		II			TTTGGGATTGGGGTGGGGATTCTGTTTTGATGATTTAGATTTGGGAAAACTTTGGGTTCT[CG]TGTCAGCAGGGGCCATGCTGTGGGAAACCTGAAGGCTGATTTGAAGCAGAATATAGAACT	37	12	52908478	CGTGTCAGCAGGGGCCATGCTGTGGGAAACCTGAAGGCTGATTTGAAGCA	12	51194745	F			NA	NA	KRT5	NM_000424	3'UTR					NA				NA
cg00028935	32777432	55661315	32777432	CTACAATCAACCATAAAACTCAAAACCAAACAACACCAACAATAAACCCA	9.69e-08	55661315	CTACAATCAACCGTAAAACTCAAAACCAAACAACGCCAACAATAAACCCG	I	A	Red	GCACTACGGCCTCTGCAGTCAGCCGTGGAACTCAGAGCCAGACAGCGCCAGCAGTGAACC[CG]GTGGACAGAGCAAGGCCAAACACCTCCGCCGCCATTGGGCCGAATTGCTGTTGGGCCAAG	37	3	147114406	CGGGTTCACTGCTGGCGCTGTCTGGCTCTGAGTTCCACGGCTGACTGCAG	3	148597096	R			NA	NA	ZIC4	NM_001168378;NM_032153;NM_001168379	Body;Body;Body	chr3:147113608-147114479	Island			NA	3:148596274-148597489			NA
cg00028993	65638499	65638499	65638499	AAACCTCAAAAAACAAAACAATAACAATAACTAACACTCAAATACCAAAC	0.000405338	NA		II			ATTCTAAGATGAAGCCTCAGAGGGCAAGGCAGTAACAATAGCTAACACTCAGATGCCAGA[CG]CAGCCTTAAGCGCTTTACATATGTTTAATCTTCTGCATGACTTATGACGCAGATGTACTG	37	19	48247714	AGCCTCAGAGGGCAAGGCAGTAACAATAGCTAACACTCAGATGCCAGACG	19	52939526	R			NA	NA	GLTSCR2	NM_015710	TSS1500	chr19:48248729-48249110	N_Shore			NA		19:48247566-48247753	Promoter_Associated	NA
cg00029246	36628502	36628502	36628502	CACCTTCACCAAAATAAAATCTCCCCTATTTTTTAAAACAAAAAACTATC	1.37e-05	NA		II			TTGCTGAATTTAGCTATGACACTCGCTGAGTCACTGCAGTGGGCAAGAAGAAATGCAGTC[CG]ATAGTTCTCTGCTTCAAAAAACAGGGGAGATCTTATCCTGGTGAAGGTGGGTCAGCACAC	37	7	137223417	ACCTTCACCAGGATAAGATCTCCCCTGTTTTTTGAAGCAGAGAACTATCG	7	136873957	F			NA	NA	DGKI	NM_004717	Body					TRUE				NA
cg00029282	41801406	12777398	41801406	AATAATCAACAACAAAAAAACCATAAAAACCACACACTCACAAACCAACA	0.00085133	12777398	AATAATCAACAACAAAAAAACCATAAAAACCGCGCGCTCACAAACCAACG	I	C	Grn	GCTTCTGCTGCTGCCGCTGCCACCGGCGCTGCGGGGGACGAGTGAAGACAGAGCACAAGG[CG]CTGGCCTGTGAGCGCGCGGCCCTCATGGTCTTCCTGCTGCTGACCACCCTCTTGCTGCTG	37	2	95941820	GGTGGTCAGCAGCAGGAAGACCATGAGGGCCGCGCGCTCACAGGCCAGCG	2	95305547	F			NA	NA	PROM2	NM_001165977;NM_001165978;NM_144707	Body;Body;Body					NA	2:95305428-95305548			NA
cg00029521	18764337	18764337	18764337	CTAAACACTATACAAAACACCCTATACATTCATTCCCTCAATTCACCCTC	0.000322865	NA		II			CCTTTTCTGTGCTGGGCACTGTGCAGGGCACCCTGTACATTCATTCCCTCAGTTCACCCT[CG]AAACCACCCTTCCAAATCAGAATTATGTGCCATATTTTACAGGCTGGAGAAGCTCTAGGA	37	6	39272634	CGAGGGTGAACTGAGGGAATGAATGTACAGGGTGCCCTGCACAGTGCCCA	6	39380612	R			NA	NA	KCNK17	NM_031460;NM_001135111	Body;Body	chr6:39271516-39271758	S_Shore			NA				NA
cg00029928	72802334	72802334	72802334	AACATAATAAAACCCCCCATCTCTACCAAAAACACAAAAAATAACTAATC	0.00451362	NA		II			CCAGCCTGGCCAACATAGTGGAACCCCCCATCTCTACCAAAAACACAAAAAGTAGCTGGT[CG]TGGTGGTGGGCGCCTGTAATCCCAGCTACTCGGGAGGCTGAGGCAGGAGAATCGCTGGAA	37	6	133080438	ACATAGTGGAACCCCCCATCTCTACCAAAAACACAAAAAGTAGCTGGTCG	6	133122131	R			NA	NA	VNN2	NM_004665;NM_078488	TSS1500;5'UTR					NA				NA
cg00029973	17633508	17633508	17633508	AACRTACRACCTAAACAATTATCTAATTATCRATTATCTAATTACCCAAC	0.00284634	NA		II			ACCCCGGGCAGTGGGAGGGCAGAGACTGTCATACCCATTTTACAGGTGAGAAATGTGTGA[CG]CTGGGCAATTAGACAACCGATAATTAGATAATTGCCCAGGCCGCACGTTGGTCTAGGCAT	37	17	3501741	CGCTGGGCAATTAGACAACCGATAATTAGATAATTGCCCAGGCCGCACGT	17	3448490	F			NA	NA	TRPV1	NM_018727;NM_080704	TSS1500;5'UTR					NA				NA
cg00030291	34687472	74697369	34687472	AAAAATAAATAACATTAACCTCACCTTACTTAAAAAAAATCAAAAACTCA	0.0204109	74697369	AAAAATAAATAACGTTAACCTCACCTTACTTAAAAAAAATCGAAAACTCG	I	A	Red	GGGTGACCGGGGGAAGGTGGGTGGCGTTGACCTCACCTTGCTTGGGGAGGGTCGGGGACT[CG]GGGAGTGAGTTTCTCTCTCTCTACTCCCCGGGGTCTCTCCTCGACCCCCATCTCCTGGGG	37	7	8302094	GAAGGTGGGTGGCGTTGACCTCACCTTGCTTGGGGAGGGTCGGGGACTCG	7	8268619	R			NA	NA	ICA1	NM_004968;NM_004968;NM_001136020;NM_022307	5'UTR;1stExon;TSS1500;TSS1500	chr7:8301031-8302252	Island	high-CpG:8268271-8268730		TRUE	7:8267384-8268777			TRUE
cg00030296	56668369	56668369	56668369	TCCTATCCCTACTAAATAACCTTAAACAAACCACTTAACAACTCTAAACC	9.89e-06	NA		II			AGTGACTTCCTTCCTGTCCCTGCTGGGTGGCCTTGAGCAAGCCACTTGGCAGCTCTGGGC[CG]CAGTTCCGTCATCTGCAAGGTGAGGGGTGGGAGCGGCACGGCCCCTAGGCAGCGCCCCCA	37	17	75318732	CGGCCCAGAGCTGCCAAGTGGCTTGCTCAAGGCCACCCAGCAGGGACAGG	17	72830327	R			NA	NA	SEPT9	NM_001113492;NM_001113491;NM_006640	5'UTR;Body;Body					TRUE	17:72830176-72830483			NA
cg00030432	19751376	19751376	19751376	AATACTCAAAATCAAATAACCCACATTACAACCCAAATCTAAAACRTCCC	0.0286467	NA		II			CGCAATCCTTCCTGTGAGGATGGGCGCCTTCGGGTGTTGAAGCCTGAGTGGTTTCGGGGC[CG]GGACGTCCTAGATCTGGGCTGCAATGTGGGCCATCTGACCCTGAGCATTGCCTGCAAGTG	37	7	100028974	ATGCTCAGGGTCAGATGGCCCACATTGCAGCCCAGATCTAGGACGTCCCG	7	99866910	F			NA	NA	MEPCE	NM_019606	1stExon	chr7:100025804-100028002	S_Shore			NA	7:99866658-99867095			NA
cg00030807	48781367	48781367	48781367	AAAAATACCACRTTCCTCATAATAAATCAAAATAATAAAAACTCRAAATC	0.000985702	NA		II			TTGAGAAACTGAGGGATACCACGTTCCTCATGGTGAGTCAAGGTGGTGAGGACTCGGGGT[CG]TGGGGACACTGCTCCTCACTCTCACAGGTGCTCTAGGTTTCCTCACAGGTGCTCACAGTT	37	8	1786072	CGACCCCGAGTCCTCACCACCTTGACTCACCATGAGGAACGTGGTATCCC	8	1773479	R			NA	NA	ARHGEF10	NM_014629	5'UTR					NA	8:1773177-1773480	8:1785796-1786117	Unclassified_Cell_type_specific	NA
cg00031105	73768443	37713385	73768443	CCTCTAAACCACATACCTAAACTTCTATCCCCACAAATTACACATAACCA	2.51e-09	37713385	CCTCTAAACCACATACCTAAACTTCTATCCCCGCAAATTACACATAACCG	I	T	Red	CTCTCTGTTCATCCTCTGAGCCACATACCTGAGCTTCTGTCCCCGCAGATTGCACATAGC[CG]TTTGCCAGCCCCAGGGCCACCTGGAGGGGGTGGACAGTGCAGGCCCCGGACCCCTAAGAC	37	6	33166117	CGGCTATGTGCAATCTGCGGGGACAGAAGCTCAGGTATGTGGCTCAGAGG	6	33274095	R			NA	NA	RXRB	NM_021976	Body	chr6:33167885-33168715	N_Shore			NA		6:33165168-33166317	Gene_Associated	NA
cg00031346	61693443	61693443	61693443	AAACTAATAAAAAATATCCTATAATTTCCTAAAATCCCCAACAATACCTC	0.000739861	NA		II			GGGGGCCAAAGCCCCAGCATCTTCCCCACAACAGGTCCTCTTATGACCCCTCCCCCAGCC[CG]AGGCACTGCTGGGGACCCCAGGAAACTACAGGACATCCCCCATTAGCTCAACTCCAGCTT	37	6	168478519	AGCTAATGGGGGATGTCCTGTAGTTTCCTGGGGTCCCCAGCAGTGCCTCG	6	168221368	F			NA	NA	FRMD1	NM_024919	Body	chr6:168479566-168479809	N_Shore			NA				NA
cg00031556	10702301	10702301	10702301	TCTCTATCTCTACAATATCTCTAATACTATATATATTTATCRCCATCATC	5.64e-05	NA		II			TTCCATCCAATTCTCTGTCTCTGCAGTATCTCTGATACTGTGTGTGTTTATCGCCATCAT[CG]ATGCTGATGCACTGTACAGCAAGGCCACCATCATCCCTGTGTACTTACTGAGATCAGTTT	37	12	11508049	CTCTGTCTCTGCAGTATCTCTGATACTGTGTGTGTTTATCGCCATCATCG	12	11399316	R			NA	NA	PRB1	NM_005039;NM_199354;NM_199353	Body;Body;Body					NA				NA
cg00031779	24778447	24778447	24778447	TACTAAAATATATTCTCCAACTTCAACAATAACCTAATTCACTAAAAAAC	5.58e-09	NA		II			TCTTCCTAAGAGGGGAAATTCCATGCCCGGGGAAGTTCTGGAAGAAGAGCATTTTTTCCC[CG]CCCTTCAGTGAACTAGGTCATTGCTGAAGCTGGAGAATATATTTTAGCATCCCTGTGATG	37	18	56296243	CGCCCTTCAGTGAACTAGGTCATTGCTGAAGCTGGAGAATATATTTTAGC	18	54447223	F			NA	NA	ALPK2	NM_052947	TSS200					TRUE				NA
cg00031896	69674316	41699451	69674316	CATATATACCACTACCAAAACTCACACTAAAACCTAACTTAACCATCACA	0.000701236	41699451	CGTATATACCGCTACCAAAACTCACACTAAAACCTAACTTAACCATCACG	I	T	Red	GATCACATAGCGCGTATGTGCCGCTGCCAGGGCTCACACTGGAGCCTGGCTTGGCCATCA[CG]TGCTTTTTTTTTTTTTTTTTTTTTTTTTAGTAACTTACCAGCCTCACTACTGCCCCATAA	37	12	122020205	CGTATGTGCCGCTGCCAGGGCTCACACTGGAGCCTGGCTTGGCCATCACG	12	120504588	R			NA	NA	KDM2B	NM_032590	TSS1500	chr12:122018170-122018457	S_Shore	low-CpG:120504543-120504591		NA		12:122019013-122020752	Promoter_Associated	NA
cg00032205	48621505	48621505	48621505	AATAATAATAACTCTTAACRTTACCTTATTCAACRAAACCCTAAAAACAC	4.78e-06	NA		II			AGTTTCTCTGATATGCGCTCGCGGGGGTGCTGCCATTTCATCTCTTCCGCGCGGGCTCAT[CG]TGCTCTCAGGGTCTCGTTGAACAAGGCAACGCTAAGAGCCATCACCACCTGTCCCCCATC	37	8	98290372	CGTGCTCTCAGGGTCTCGTTGAACAAGGCAACGCTAAGAGCCATCACCAC	8	98359548	F			NA	NA	TSPYL5	NM_033512	TSS200	chr8:98289604-98290404	Island			NA	8:98358575-98359687	8:98289986-98290577	Promoter_Associated	TRUE
cg00032366	65680325	65680325	65680325	TATTCCACRAAATACACCTCCAAACCCTCRATAATAAAAACTACCAAATC	0.00110301	NA		II			TCTCCCGGTAGTGTTCCACGAAGTGCACCTCCAGGCCCTCGGTGATGAAGGCTGCCAGGT[CG]TAGAAGTCCTTCTTGTTCTCGGCTGGCAGGACGATGCACGTCACCCCTGCGCGCTTGGCC	37	19	5692159	CGACCTGGCAGCCTTCATCACCGAGGGCCTGGAGGTGCACTTCGTGGAAC	19	5643159	R			NA	NA	LONP1	NM_004793	Body	chr19:5690127-5692213	Island			TRUE	19:5642899-5643200			NA
cg00032664	25619471	25619471	25619471	TCCTAAAATCCCTACTTAACTAATCTCTAAACTTAAAAATCTTTCAAACC	1.95e-07	NA		II			AAACTTTCAAATCCTGAAGTCCCTGCTTAGCTGGTCTCTAAACTTAAAAGTCTTTCAGGC[CG]GGCACCATGGCTCACACCTATAATCCCAGCACTATTGTGAGGCCCAGGTGGGCATGAGCC	37	3	125237438	CCTGAAGTCCCTGCTTAGCTGGTCTCTAAACTTAAAAGTCTTTCAGGCCG	3	126720128	R			NA	NA	SNX4	NM_003794	Body	chr3:125238496-125239201	N_Shore			NA				NA
cg00032756	28714436	28714436	28714436	TCCCRAAACTACATAATAAAACRAAAACCTTTCTCTTTCAAAATATACCC	0.0273683	NA		II			GGCAAGAGCAACTCCTGCCGGGGTTATCGGAACTGAAATCACAGTGGGGATGCAGCACGC[CG]GGCATACCTTGAAAGAGAAAGGCTTTCGTCCCATTATGCAGCCCCGGGACCTGACGCACT	37	12	45268999	CCCGGGGCTGCATAATGGGACGAAAGCCTTTCTCTTTCAAGGTATGCCCG	12	43555266	F			NA	NA	NELL2	NM_001145110;NM_001145107;NM_006159;NM_001145108;NM_001145109	Body;Body;Body;Body;Body	chr12:45269830-45270835	N_Shore			NA	12:43555263-43555910			NA
cg00032805	12788407	12788407	12788407	CAAAACAACCTTTATCTTAAATTTAACRCTAATACRCTCAACCCTAAATC	0.00680625	NA		II			CTCTCGCCCAGGAGGGCGGTTGCAGGGAACCGAAATCGGACACAACAGTTGCAGTGAACC[CG]ACTCAGGGTTGAGCGCATCAGCGCTAAACCCAAGACAAAGGCTGCCCTGTGTCTTCCGTA	37	4	165304473	AGGGCAGCCTTTGTCTTGGGTTTAGCGCTGATGCGCTCAACCCTGAGTCG	4	165523923	F			NA	NA	2019-03-01	NM_001166373	TSS200	chr4:165304328-165305177	Island			NA	4:165523779-165524912			NA
cg00033155	14680312	14680312	14680312	TTTCTCTAACACCAAATATATATTATTACATCAATTCTTCTACACCAACC	5.38e-05	NA		II			CTGTGGGGGTCTGTGCTAGCTCCAGGCATTAGCATCAGAATCGAATTGAATTGCTGACAC[CG]GTTGGTGTAGAAGAACTGATGTAATAACACATATTTGGTGTCAGAGAAAAACCACATACT	37	2	110925418	TTCTCTGACACCAAATATGTGTTATTACATCAGTTCTTCTACACCAACCG	2	110282707	F			NA	NA	NPHP1	NM_001128179;NM_207181;NM_000272;NM_001128178	Body;Body;Body;Body					TRUE				NA
cg00033304	12605334	12605334	12605334	TACTTATAATTCAATTAAAACCAAAATTTTACACTTACTTAAACTTCAAC	0.0282254	NA		II			ACACCCGGCCTGGAATGCTGTCTATTGAGGAAAGGAAGAGGCTGTACTGGGGAGTGCCAG[CG]TTGAAGTTCAAGCAAGTGTAAAACTCTGGCCTTAACTGAATCACAAGTAGGAAACAAGTT	37	3	185302692	ACTTGTGATTCAGTTAAGGCCAGAGTTTTACACTTGCTTGAACTTCAACG	3	186785386	F			NA	NA	SENP2	NM_021627	TSS1500	chr3:185303822-185304497	N_Shore			NA				NA
cg00033371	26629305	70708310	26629305	TCTCTACTCACCTTACACACATTATACTAACACACAATCATAATAAACCA	0.0238915	70708310	TCTCTACTCACCTTACACACGTTATACTAACACACGATCGTAATAAACCG	I	A	Red	TTGTTCCTGAGTAAAGTGGAGGAGACGTTCCAGTGTATCTGCTGTCAGGAGCTGGTGTTC[CG]GCCCATCACGACCGTGTGCCAGCACAACGTGTGCAAGGTGAGTAGAGATGGCCGCGGGAG	37	19	4956786	CGGCCCATCACGACCGTGTGCCAGCACAACGTGTGCAAGGTGAGTAGAGA	19	4907786	F			NA	NA	UHRF1	NM_013282;NM_001048201	Body;Body	chr19:4954453-4954870	S_Shore			NA				NA
cg00033490	67770302	67770302	67770302	ACTATATCATATCATAAAAAACACAAAAAATCAACTAAACTAACTTTTCC	0.00148956	NA		II			TTATGCTTCACAGGTTTGTTGTGGCCTGTTCAGCCTGGAAATCCTGTCCCGAGACTGATG[CG]GAAAAGCTAGTTCAGCTGACTTTTTGTGCTTTTCATGATATGATACAGCTGATGAACTCT	37	7	87027887	CTGTATCATATCATGAAAAGCACAAAAAGTCAGCTGAACTAGCTTTTCCG	7	86865823	F			NA	NA	CROT	NM_021151;NM_001143935	Body;Body					TRUE				NA
cg00033551	71615387	26607460	71615387	ATACCATATCACACTCTAACTCAAAACTACAAATCTACTATAAATATCCA	0.000150651	26607460	ATACCGTATCGCGCTCTAACTCGAAACTACAAATCTACTATAAATATCCG	I	A	Red	GCATCCACCGCGGTGCCGTGTCGCGCTCTGACTCGGGGCTGCAGATCTGCTGTGGGTGTC[CG]GGGATCTGGGATCGTCTGTCCCAAGAGGGACACAGCGTATTTGGCACAGTTAGGGAGTCC	37	16	4738568	GTGCCGTGTCGCGCTCTGACTCGGGGCTGCAGATCTGCTGTGGGTGTCCG	16	4678569	R			NA	NA	MGRN1	NM_001142291;NM_015246;NM_001142290;NM_001142289	3'UTR;Body;3'UTR;Body					NA	16:4677950-4679038			NA
cg00033584	61672473	61672473	61672473	ATACACTTAATCACCCAAAAACTCTAATAAAAATCTACAAAAAAATTAAC	0.0233573	NA		II			ATTACTCCTTGATCCATGGGCTGCAGAATGGATGTTGTGTTAGCAGGCATGAAAACCCCA[CG]TTAATCTCCTTGTAGATCTCCATCAGAGTTCTTGGGTGACCAAGTGTATTGTCCATGAGC	37	3	44800749	TACACTTGGTCACCCAAGAACTCTGATGGAGATCTACAAGGAGATTAACG	3	44775753	F			NA	NA	KIAA1143	NM_020696	Body	chr3:44802852-44803618	N_Shelf			NA				NA
cg00033834	51601371	51601371	51601371	ACTAAAACCAAACRAACAAATCCTAATCACAAAAACTAAAAACRAAAACC	0.0204062	NA		II			GAGTCCCGTCCAGGGAGGCGCTCAGCCCCAGCTGCTGTCTGTGCATGAAGCAGTGCCCGG[CG]GCCCTCGCCCCCAGCTCCTGTGATCAGGACCTGCCCGTCTGGCCTCAGTCCTGCTTCCCT	37	10	135018844	CTGAGGCCAGACGGGCAGGTCCTGATCACAGGAGCTGGGGGCGAGGGCCG	10	134868834	F			NA	NA	KNDC1	NM_152643	Body	chr10:135018677-135019084	Island			NA	10:134868709-134869074			NA
cg00033909	53718454	53718454	53718454	CCTTAACCATAAAAACTACATTTCAAAATACCTAATTAATACCTAAAATC	1.14e-05	NA		II			CTGTGCAGTTGTGAAGAAAAAAAATTAATGCATAGCATACACAGGGTTTGGTACTATCCT[CG]ATTTCAGGCATCAACCAGGCATCTTGAAATGTAGTCCCCATGGTTAAGGGCAGGCTACTT	37	7	9674902	CTTAACCATGGGGACTACATTTCAAGATGCCTGGTTGATGCCTGAAATCG	7	9641427	F			NA	NA	PER4	NR_002790	Body					NA				NA
cg00034076	68727422	21688396	68727422	CAATTACACATTTTACTAAACTTAAAAAACACTCCCAACAAACACAATCA	4e-05	21688396	CAATTACACATTTTACTAAACTTAAAAAACGCTCCCAACGAACACGATCG	I	C	Grn	CCAAGTTTTTCTAGCATGCGATCGTTCTGTAGACAAGGCGCTGTGTCTCGGAGTCCGCGG[CG]ACCGTGCCCGCTGGGAGCGTCTCCCAAGTCCAGCAAAATGTGCAACTGGTTTTATGGAAA	37	8	85096037	CAGTTGCACATTTTGCTGGACTTGGGAGACGCTCCCAGCGGGCACGGTCG	8	85258592	F			NA	NA	RALYL	NM_173848;NM_001100391;NM_001100392;NM_001100393;NM_173848	5'UTR;TSS1500;5'UTR;5'UTR;1stExon	chr8:85096759-85097247	N_Shore		CDMR	NA	8:85258570-85258612			NA
cg00034154	58688413	58688413	58688413	AAACTAATAACATTTAACAATATTTATTAAATACTTACTATAAACTAAAC	0.0154123	NA		II			GAGAAGAAAGCCCACTTCATGGGGGTGATGGGAAAATCCTTTTAAATGACGCATGAGGCA[CG]TTTAGCTCATAGTAAGCACTCAACAAATACTGCCAAATGTTATTAGCTCCCCTCTTTCCT	37	19	10337163	AGCTAATAACATTTGGCAGTATTTGTTGAGTGCTTACTATGAGCTAAACG	19	10198163	F			NA	NA	S1PR2	NM_004230	5'UTR	chr19:10334618-10335511	S_Shore			TRUE				TRUE
cg00034468	28640310	28640310	28640310	AAAAAATAACCACRCTCAATAAAAATCTTCATCAAATAATCRATAAAATC	4.73e-06	NA		II			CTGTGGTCACGAAGGAGTAGCCACGCTCAGTGAGGATCTTCATCAGGTAGTCGGTGAGAT[CG]CGGCCCGCCAGGTCCAGGCGCATGATGGCGTGCGGCAGCGCGTAGCCCTCATAAATGGGC	37	1	229568077	AGGAGTAGCCACGCTCAGTGAGGATCTTCATCAGGTAGTCGGTGAGATCG	1	227634700	R			NA	NA	ACTA1	NM_001100	Body	chr1:229567206-229570684	Island			NA	1:227633789-227635682	1:229567937-229568207	Unclassified_Cell_type_specific	NA
cg00034574	36600491	36600491	36600491	ATAACAACTTTACCTTTTACTCTCCAAAATAAACAACAAATAAACCCAAC	0.00253657	NA		II			GGTACGGAGAGAATCTCTACAACCAGGCCTCCTTATCAACCCCCAAGACAACTCTCTCCC[CG]CTGGGCCCACCTGCTGCCCACCCTGGAGAGCAAAAGGCAAAGCTGTCATGCGGCCTCTGA	37	20	62397348	TGACAGCTTTGCCTTTTGCTCTCCAGGGTGGGCAGCAGGTGGGCCCAGCG	20	61867792	F			NA	NA	ZBTB46	NM_025224	Body	chr20:62398409-62398990	N_Shore			NA				NA
cg00034604	52675508	52675508	52675508	CAATCTTCACCAACTCAACAAATAAAAAATTTAACTATTTTTATTCAAAC	0.019665	NA		II			TAGTTGGATTTGGCCAGAGAATTTTAAAAAGAGAGTCTGGGATACTCCAATGATGTTTTT[CG]CCTGAACAAAAATAGTTAAACTTCCCATTTGCTGAGCTGGTGAAGACTGCAAGAGGAGAA	37	8	54787585	CGCCTGAACAAAAATAGTTAAACTTCCCATTTGCTGAGCTGGTGAAGACT	8	54950138	F			NA	NA	RGS20	NM_170587	Body	chr8:54789581-54790665	N_Shore			NA				NA
cg00035000	45702504	45702504	45702504	AAACATTTTCTCCTTAAAATTTTTACCATATAAATCCCCAATCCCTACAC	0.00719791	NA		II			TGCCTTTTGAAAAAGAATCAGACTTTAAACAGAGTCACAACTATTTAAACGTGGCCGCCG[CG]TGCAGGGACTGGGGATCCATATGGTAAAAATTTCAAGGAGAAAATGTTTGGGATCTGATT	37	1	25255003	AACATTTTCTCCTTGAAATTTTTACCATATGGATCCCCAGTCCCTGCACG	1	25127590	F			NA	NA	RUNX3	NM_001031680;NM_004350	Body;Body	chr1:25255527-25259005	N_Shore			NA				NA
cg00035074	41677344	41677344	41677344	AAAACTAAAACATCRACTAACAACAACRTTCAAATATAACCCRAATTAAC	0.0250052	NA		II			TGCCCTCCTGTCCCCTCCCCGCAGGGGCACAGTGGAGACGCAGGGGCTCTGGGCCCGTAC[CG]CCAACTCGGGTCACACCTGAACGCTGCTGCCAGCCGATGCCCCAGCCCTGCACGCCACCC	37	7	2701567	CGCCAACTCGGGTCACACCTGAACGCTGCTGCCAGCCGATGCCCCAGCCC	7	2668093	F			NA	NA	TTYH3	NM_025250	3'UTR	chr7:2701330-2701744	Island			NA	7:2667873-2668358	7:2701527-2701656	Unclassified_Cell_type_specific	NA
cg00035220	13614391	13614391	13614391	AAAAAATTTTCCTATAACTAAAATAACCTCTATAACCATACCTAACCTTC	0.00854538	NA		II			AGAATTCCTGGGTGTCACATCCCCTAGGATTTTGGGGTCCTAGCAATGCCAACACCTAGA[CG]AAGGTCAGGCATGGCCACAGAGGCCACCCTAGCTATAGGAAAACTCTCTGAAAGCTTCGA	37	7	158197980	GAGAGTTTTCCTATAGCTAGGGTGGCCTCTGTGGCCATGCCTGACCTTCG	7	157890741	F			NA	NA	PTPRN2	NM_002847;NM_130842;NM_130843	Body;Body;Body	chr7:158198545-158198907	N_Shore			NA		7:158197949-158198332	Unclassified_Cell_type_specific	NA
cg00035316	13712369	59602461	13712369	AATTTCCAAAAACCCCAAACAACCTCAAAAATACTACAAACTAACAAACA	3.67e-07	59602461	AATTTCCGAAAACCCCAAACGACCTCAAAAATACTACAAACTAACGAACG	I	A	Red	CAAGTCAGGATCGCGCTCGCAGGCTGGGCCAACCCACAAGGAGCTAGGGGTAGCTGAAAT[CG]CTCGCCAGCCTGCAGCATCTCTGAGGCCGTCTGGGGTTTTCGGAAATTTGCATTTGGTGT	37	2	176993017	CGCTCGCCAGCCTGCAGCATCTCTGAGGCCGTCTGGGGTTTTCGGAAATT	2	176701263	F			NA	NA	HOXD8	NM_019558	TSS1500	chr2:176992950-176993186	Island			NA	2:176701214-176702101			NA
cg00035623	49736375	49736375	49736375	CCTTAACAATACAAAACRTAAATCCAAAAACATTTCCAACACAAAATAAC	0.00350824	NA		II			CCCTCCTTTGAGCCGTGGTGGAGGTGGGCGCTGGAACTCCGACTACATTTTTCTATGAGG[CG]CCATTTTGTGCTGGAAATGCTCTTGGACCCACGTCCTGTATTGCTAAGGCTCAAAGATCA	37	19	55919836	CTTAGCAATACAGGACGTGGGTCCAAGAGCATTTCCAGCACAAAATGGCG	19	60611648	F			NA	TRUE	UBE2S	NM_014501	TSS1500	chr19:55918699-55919816	S_Shore			NA	19:60610512-60611649	19:55918477-55920251	Unclassified	NA
cg00036110	46607505	46607505	46607505	CAAAAATTACCTTTAACRTACAATAACAATTAATTTCCTCTTAAACTACC	0.0084412	NA		II			AGCAATCATTTCCTGCTCCCACCCTGGGCTGACAGCACCTGTGTACTAGACTGTTTTCAC[CG]GCAGTTCAAGAGGAAATCAACTGTCACTGCACGTCAAAGGTAATTTCTGATCACAAGTAC	37	1	40146660	CGGCAGTTCAAGAGGAAATCAACTGTCACTGCACGTCAAAGGTAATTTCT	1	39919247	F			NA	NA	HPCAL4	NM_016257	3'UTR	chr1:40149431-40150013	N_Shelf			NA		1:40146493-40147300	Unclassified_Cell_type_specific	NA
cg00036119	49677464	49677464	49677464	ACAAAAAACTCCTACCTCATCACRACAACTACATATATAAATAAACCCAC	0.000962056	NA		II			CTGTGGCAGACACAGGAAACTCCTACCTCATCACGGCAGCTGCATGTGTGGGTAAGCCCA[CG]GTGATGATGACTTCTGTACTGGCTGTTTTTACTCCTTGCTTTAATGATATTAGCTCACGT	37	16	7277833	CAGGAAACTCCTACCTCATCACGGCAGCTGCATGTGTGGGTAAGCCCACG	16	7217834	R			NA	NA	A2BP1	NM_001142334;NM_001142333;NM_018723	Body;Body;Body					TRUE				NA
cg00036732	70618400	70618400	70618400	TTTATATTTATAACCAAACAACCTCTCCCTTCACCCAAATTTATAACCTC	3.38e-05	NA		II			TGTCTTGTTTATTTGTGTTTGTGACCAAGCAGCCTCTCCCTTCACCCAGGTTTATGGCCT[CG]TTTTCACTTGTATATTTTTCACACTGTAAATTTCTTGTACAAACCCAAAGAAAAAATTAA	37	10	102767507	CGAGGCCATAAACCTGGGTGAAGGGAGAGGCTGCTTGGTCACAAACACAA	10	102757497	R			NA	NA	LZTS2	NM_032429	3'UTR	chr10:102766321-102766693	S_Shore			TRUE				NA
cg00037056	51685365	51685365	51685365	CRATAACACTATAAACTAAATACTTAACRCCCTAAAAAAAACACRATACC	2.45e-06	NA		II			CGGCTGAGCCCACCTGTGCCCAGGGGCAGGATGGCCACAGAAGGCTCCGGGCAGGCCAGT[CG]GTACCGTGTCTCCTCCAGGGCGCCAAGCACCCAGCCCACAGTGCCATCGCCACCACACAC	37	4	956607	CGGTACCGTGTCTCCTCCAGGGCGCCAAGCACCCAGCCCACAGTGCCATC	4	946607	F			NA	NA	DGKQ	NM_001347	Body	chr4:960505-960836	N_Shelf			NA	4:946034-946847			TRUE
cg00037223	36641317	11741309	36641317	CAATTATATTAAAATCCCCTAAACAATAAACAAAAATAACAAAAAACACA	5.02e-05	11741309	CGATTATATTAAAATCCCCTAAACAATAAACAAAAATAACAAAAAACACG	I	A	Red	AACCTGTCCCCTCGGTTGTGTTGAAGTCCCCTGGACAGTGGGCAGGGGTGGCAGAGGACA[CG]AGCAGCCACTGCCCGTACCCCCTCTCCTCTCTGTAAGCCCATGCCCTGTCTTCCCAGGGA	37	16	29821824	CGGTTGTGTTGAAGTCCCCTGGACAGTGGGCAGGGGTGGCAGAGGACACG	16	29729325	R			NA	NA	MAZ	NM_001042539;NM_002383	3'UTR;3'UTR	chr16:29823163-29823906	N_Shore			TRUE				NA
cg00038233	51782340	51782340	51782340	ACTTTCAAAAAACTTATCCTTAATCTCTCAAAACAAATAAAAATCTCAAC	0.0177983	NA		II			CATGAACCTTGATGCTCTCTGGATCATTTGGGAGGTCGTGGGAATCCCATTATGGAGTTG[CG]CTGAGATTCTTACCTGCTCTGAGAGACCAAGGACAAGCCCTTTGAAAGCAGGCAGTAGTG	37	11	123899065	CGCTGAGATTCTTACCTGCTCTGAGAGACCAAGGACAAGCCCTTTGAAAG	11	123404275	F			NA	NA	OR10G8	NM_001004464	TSS1500					NA				NA
cg00038298	52672410	52672410	52672410	ATATATACACCTCTAAAACACTACCATCAAAAAAATAAATATAACCAAAC	0.0240246	NA		II			CATTTCGATATATGTATACACCTCTGAAACACTGCCATCAAGAGAGTAAATATGGCCAGG[CG]TGGTGGCTCACACCTGTAATCCCAGCACTTTGGGAGGCTGAGGTGGGTGGATCACCTGAG	37	3	49235033	CGCCTGGCCATATTTACTCTCTTGATGGCAGTGTTTCAGAGGTGTATACA	3	49210037	R			NA	NA	CCDC36	NM_178173	TSS1500	chr3:49236567-49237328	N_Shore			NA				NA
cg00038446	70699457	70699457	70699457	AATAAAATAAATCCCCAAAACATCTCTCTTACTTATCTATTAATTTCACC	0.0121101	NA		II			TGAAAGAGGCCAATGCCCCACTGGCAGCATCTTCACTTCTAAATGCATATCCTGAGCCAT[CG]GTGAAACTAACAGATAAGCAAGAGAGATGTTTTGGGGACTCATTTCATTCCTAACACAGC	37	1	172635668	CGGTGAAACTAACAGATAAGCAAGAGAGATGTTTTGGGGACTCATTTCAT	1	170902291	F			NA	NA	FASLG	NM_000639	3'UTR					NA				NA
cg00038584	35602376	70791393	35602376	AAAAAATCCTATATCAAAAATAAATAAATACCCTAATATAATCACTCTCA	0.022798	70791393	AAAAAATCCTATATCAAAAATAAATAAATACCCTAATATAATCGCTCTCG	I	C	Grn	CAAACTCCTGGACTCAAGTCATCTTCCCGCCTCAGCCTCCCAAAGTCCTGGGATCACAGG[CG]AGAGCGACCACACCAGGGTATTTATTCATTTTTGACATAGGATCTCTCTGGGTTGGCCTG	37	19	17933300	GAGAGATCCTATGTCAAAAATGAATAAATACCCTGGTGTGGTCGCTCTCG	19	17794300	F			NA	NA	INSL3	NM_005543	TSS1500	chr19:17931951-17932370	S_Shore			NA				NA
cg00038857	18692487	18692487	18692487	AATAAATAAAATCAATCTTTTACAAACCTAATTCCTTCTTACCACRCCCC	6.97e-06	NA		II			CCTGCAGGGGGAGTAGATGAGGTCAGTCTTTTGCAAACCTGGTTCCTTCTTGCCACGCCC[CG]CCCACAGCCCCACTGTGTGTGAACCAAGAGAGTTGGAAGGCCTTCTGCAGACGGACCCAT	37	17	32645753	CGGGGCGTGGCAAGAAGGAACCAGGTTTGCAAAAGACTGACCTCATCTAC	17	29669866	R			NA	NA	CCL8	NM_005623	TSS1500					NA				NA
cg00039480	43787332	43787332	43787332	ACAAACCACCAATTCTTCTAAAAAACRAAAATCACTATAAACACCATCAC	8.5e-09	NA		II			GAGGCCAGGACAGGGCAGCCTGGCTGGGGCAGCTGAGCCACTGGGCGTCCTGTACCCGGG[CG]TGATGGTGCCCACAGTGACTCCCGTTTTTCAGAAGAATTGGTGGCCTGCCCGAAGTCACA	37	17	19620267	CAGGCCACCAATTCTTCTGAAAAACGGGAGTCACTGTGGGCACCATCACG	17	19560859	F			NA	NA	SLC47A2	NM_001099646;NM_152908	TSS1500;TSS1500	chr17:19617083-19617424	S_Shelf			NA				TRUE
cg00039864	53763347	53763347	53763347	AAATAATACTTTCCTATCATTTCCTTTCATTTATTACTTTATCAATAACC	3.49e-05	NA		II			TGGAAGCTCGAGGATGGTGCTTTCCTGTCATTTCCTTTCATTTATTGCTTTATCAGTGGC[CG]TAAGTGTTTCCATCACCAACCGAACAGCATATGTAAACCTGCACACTCTGAAAAAAATTC	37	5	177950666	CGGCCACTGATAAAGCAATAAATGAAAGGAAATGACAGGAAAGCACCATC	5	177883272	R			NA	NA	COL23A1	NM_173465	Body	chr5:177952110-177952738	N_Shore			NA				NA
cg00039936	26661414	26661414	26661414	TACTAATCTTCTCTATATCRTTCCAATATTAATACATATACTATCRAAAC	0.000117474	NA		II			CGCAGGGCCCATGCTAATCTTCTCTGTATCGTTCCAATGTTAATACATGTGCTGTCGAAG[CG]AGCACTGCCCTGCTATTTAGGGACAGACTTTTCCTGTTCTCTTCACACTTCTCAAAAAGA	37	19	50267881	CGCTTCGACAGCACATGTATTAACATTGGAACGATACAGAGAAGATTAGC	19	54959693	R			NA	NA	TSKS	NM_021733	TSS1500	chr19:50269632-50270505	N_Shore			NA				NA
cg00040016	27637380	27637380	27637380	CTACAAACATATACCACCACACTAAACTAATATTTTTTCTTAATAAAAAC	1.22e-05	NA		II			AGTAGCTGGGACTACAGGCATATGCCACCACACTGGGCTAATATTTTTTCTTAGTAGAGA[CG]GAATCTCACTGTGTTGTCCGAGCTAGTCTCGAACTCCTGGGCTCAAGTGATCCTGCTGCC	37	17	57833286	TACAGGCATATGCCACCACACTGGGCTAATATTTTTTCTTAGTAGAGACG	17	55188068	R			NA	NA	TMEM49	NM_030938	Body					TRUE				NA
cg00040426	16784399	16784399	16784399	AAAATTAATCAATCTCCTATACCAAATCCCTAAAAAACCCTAAACCCAAC	0.00554621	NA		II			ACATCCAGGAAGGGATTGGTCAGTCTCCTGTGCCAGGTCCCTGGGGGACCCTGAGCCCAG[CG]GTATAAAGGGCGGCTGTGGGAGGACTGGTACAGCCTCTCCCAGCCCCAGCAAGCGACCTG	37	9	138413253	CGCTGGGCTCAGGGTCCCCCAGGGACCTGGCACAGGAGACTGACCAATCC	9	137553074	R			NA	NA	LCN1	NM_002297	TSS200					NA				NA
cg00040466	14686454	14686454	14686454	ATCCCRATACCCAACCCAACTCCAAACTCTCAAAACTACAAACTAAAAAC	0.00231296	NA		II			GCTCTGCAGGTGTCCCGATGCCCAGCCCAGCTCCAGACTCTCAGGGCTACAAGCTGAGGG[CG]CCGGAGCGCGAGCCTGGGCCGGGGGGCTCTGTCCTCGCGTCTCTAGAACGAGGAGCCGGT	37	6	168918597	TCCCGATGCCCAGCCCAGCTCCAGACTCTCAGGGCTACAAGCTGAGGGCG	6	168661446	R			NA	NA	SMOC2	NM_022138;NM_001166412	Body;Body	chr6:168918596-168918902	Island			NA	6:168660620-168661776			NA
cg00040873	26656430	26656430	26656430	TAAAAAACACAAACCRTTAAAACRCACACRACAAAATAAACAAATAACAC	0.0237863	NA		II			AGTCTGTAGGGACTAGGCAATCCAGGAAAGCTTCCTGGAGGAGTAGGGTGTTTGGAATCG[CG]TGCTATTTGTTCACTTTGTCGTGTGCGCTCTAACGGCCTGTGTTCTCCATCACAGTTTAT	37	16	2009157	GGAGAACACAGGCCGTTAGAGCGCACACGACAAAGTGAACAAATAGCACG	16	1949158	F			NA	TRUE	NDUFB10	NM_004548	TSS1500	chr16:2009496-2009919	N_Shore			NA		16:2008856-2009925	Promoter_Associated	NA
cg00041401	53745448	53745448	53745448	AAAAACTATAATTTACTAACTTCATCACAAACCCTAAAAAAAATTAATAC	1.21e-05	NA		II			CAGAGCATGCTGAAGGCTGTGGTTTACTGACTTCATCACAAGCCCTAGAGGAAATTAGTA[CG]TAACCACCTTCTGTGGTCACATAACACAGCCATCATCTCACTCCAGGGCCCTAGTGCCTT	37	1	114414408	CGTACTAATTTCCTCTAGGGCTTGTGATGAAGTCAGTAAACCACAGCCTT	1	114215931	R			NA	NA	PTPN22	NM_012411;NM_015967	TSS200;TSS200					TRUE		1:114414133-114414623	Promoter_Associated	NA
cg00041641	37609383	37609383	37609383	AACCAAAAATATCTCTATACATTACCAAATTTCTCCTAAAAAACAAAATC	0.0268956	NA		II			AGCAGAAATCACTTCAGAGAAAAATATCTTGACTTTAGAGTTGTGGTTCTCAAATGGAGG[CG]ATTTTGCCCCCTAGGAGAAATCTGGCAATGTATAGAGACATTTTTGGTTGTCATAACTAG	37	1	151024614	ACCAAAAATGTCTCTATACATTGCCAGATTTCTCCTAGGGGGCAAAATCG	1	149291238	F			NA	NA	CDC42SE1	NM_020239;NM_001038707	3'UTR;3'UTR	chr1:151020162-151020627	S_Shelf			NA				NA
cg00041898	46603341	46603341	46603341	AACAAAACCACTAAACCCAAAACTAATAACTAATAAAATATTAAAATATC	0.00949483	NA		II			CGGCCGCGTGTTGCTCGTGGGGTGAGGACAGGTTTGGTGCGTGGGACCTGTGGTACTGAG[CG]ACACTCCAATACCTCATCAGCCATCAGCCCTGGGCCCAGTGGCTTTGTCAGGTCTTGGAG	37	8	143358426	ACAAAGCCACTGGGCCCAGGGCTGATGGCTGATGAGGTATTGGAGTGTCG	8	143356333	F			NA	NA	TSNARE1	NM_145003	Body	chr8:143359844-143360110	N_Shore			NA				NA
cg00042081	27682490	27682490	27682490	AATACCRCTATACCTAAACCATACTCAATAACAAATATCAATATTTAAAC	0.000106802	NA		II			CACATATAATAGATGCCGCTATGCCTGAACCATACTCAGTAACAGATATCAATATTTAAG[CG]TACAACAGCACATGTCGTAAGCAAAGGCAGTAAATAGTAGGCCAAAGACCTGGATTCATT	37	6	127475733	CGCTTAAATATTGATATCTGTTACTGAGTATGGTTCAGGCATAGCGGCAT	6	127517426	R			NA	NA	RSPO3	NM_032784	Body					TRUE				NA
cg00042186	69795494	69795494	69795494	ACTATTCRACTACRCTAAAACCATCCTATTCTTCAACCTCTTCCTAAAAC	0.0206016	NA		II			CTGCGGCGCAGCTGGCGCTCCCGGCAGGCGCGCATGATGAAGGCCAGCAGCGAGATGATG[CG]CTCCAGGAAGAGGTTGAAGAACAGGATGGTCCCAGCGCAGCCGAACAGCCCGTAGGCGAT	37	2	47748839	CGCTCCAGGAAGAGGTTGAAGAACAGGATGGTCCCAGCGCAGCCGAACAG	2	47602343	F			NA	NA	KCNK12	NM_022055	Body	chr2:47747991-47749061	Island			NA	2:47601496-47602490			TRUE
cg00042837	15687305	15687305	15687305	AAATAAACAAAATACCCTCCCCAATTCTCTTACCCTAACTAAAAAAAAAC	1.22e-06	NA		II			GAGGGGAGCAGGGATGGGCAGGGTGCCCTCCCCAGTTCTCTTACCCTAGCTGGAAGAGGA[CG]TTCAAGTGGGGGTTGCCCAGGGAAGTGGGAGTTGGTGATTCCTTCCTCTTTTTAGAACTC	37	17	37028650	CGTCCTCTTCCAGCTAGGGTAAGAGAACTGGGGAGGGCACCCTGCCCATC	17	34282176	R			NA	NA	LASP1	NM_006148	Body	chr17:37025737-37027104	S_Shore		RDMR	NA				NA
cg00043379	46609509	46609509	46609509	AAATAACAAAACCTAAAACRACCTCCTCAAAACCTCRATCTATAATTTTC	0.00710197	NA		II			GCTCTGAAAGGTCCCCTACCCGCCCCTCCCCCGCCCCCTCCCCCAGACCAATTATGCCTC[CG]AAAATTATAGACCGAGGCCTTGAGGAGGCCGCCCCAGGCCCTGTCACCCCCTCCCGCTCC	37	11	69634240	GGTGACAGGGCCTGGGGCGGCCTCCTCAAGGCCTCGGTCTATAATTTTCG	11	69343177	F			NA	NA	FGF3	NM_005247	TSS200	chr11:69632033-69634710	Island			NA	11:69340820-69343647			NA
cg00043510	56616400	56616400	56616400	CTTCTCTATTCCCAAAATTTCRTATTATTTTACCAAATCRAAAAATAAAC	7.77e-05	NA		II			TTTTAAAACACTTTAGTGATTACAGCCCTCTTCCTTTCAGGGAAAAAACAGTTTAAGCGC[CG]TCCATTTTCCGACTTGGTAAAATAATACGAAACCTTGGGAATAGAGAAGCAACGAAAACA	37	1	235814134	TTCTCTATTCCCAAGGTTTCGTATTATTTTACCAAGTCGGAAAATGGACG	1	233880757	F			NA	NA	GNG4	NM_001098722;NM_001098721;NM_004485	TSS1500;TSS200;TSS200	chr1:235814280-235814488	N_Shore			NA		1:235814105-235814861	Unclassified_Cell_type_specific	TRUE
cg00043599	61690357	61690357	61690357	CAAAACCTCCTTAAAATCCTAAAACCCACAAAACCAACTAAAAAAAACCC	1.93e-06	NA		II			CGCAGCACTCCGAAGCCTTGTCAACAACCCGCGATACAGGTGAGGGGTGGGCCCTGCCTG[CG]GGTTTTTCTTAGCTGGCTCTGTGGGCCCCAGGACTCTAAGGAGGCCCTGGTGAGAAGAGG	37	1	45274600	CGGGTTTTTCTTAGCTGGCTCTGTGGGCCCCAGGACTCTAAGGAGGCCCT	1	45047187	F			NA	NA	BTBD19	NM_001136537	Body	chr1:45271679-45272318	S_Shelf			NA				NA
cg00043788	42670307	42670307	42670307	TAAAACTTCCTCTAAACTAAACCCTCCRCAAACRAAATCCAAAAAAACTC	1.58e-05	NA		II			GCTAGTGCGCCCGTCGGAAAGCGAGTCCCGGCCGGTCATGGTTCCTTAGCAAGCAAGGCG[CG]AGCCTCTCTGGATCCCGTTTGCGGAGGGCCCAGCTTAGAGGAAGCTTTATAGGATTGGGC	37	20	25062754	AAAGCTTCCTCTAAGCTGGGCCCTCCGCAAACGGGATCCAGAGAGGCTCG	20	25010754	F			NA	NA	VSX1	NM_199425;NM_014588;NM_014588;NM_199425	5'UTR;1stExon;5'UTR;1stExon	chr20:25061761-25062928	Island		DMR	NA	20:25009762-25010928	20:25062679-25063451	Unclassified_Cell_type_specific	NA
cg00044107	47777378	47777378	47777378	CAAATCATACCATAATTATAATATTAAATCRAACAAAACCTTACRTACCC	1.13e-05	NA		II			TCCGCTCGGGCTCCACCGGCACGATGAAGGGCTCGCGCTCAGGCAGGTAGGCCCCGCCCT[CG]GGCACGTAAGGCTCTGTCCGATTCAACATTACAATTATGGCATGATTTGGAAGGCACACA	37	6	75795067	CGGGCACGTAAGGCTCTGTCCGATTCAACATTACAATTATGGCATGATTT	6	75851787	F			NA	NA	COL12A1	NM_080645;NM_004370	3'UTR;3'UTR	chr6:75794880-75795088	Island			TRUE	6:75851449-75851808			NA
cg00044245	23659481	23659481	23659481	TTATTCTAACTTATTTATTTAAATATCTACCTACACAAACCAACTCRTCC	0.000833813	NA		II			GGGGGCGGGGAGCCGGCGGGGGAGGGTCGCCCGGCGCCGGAGGCGCGGCCGGCAGCGCCG[CG]GACGAGCTGGCTTGTGCAGGTAGACATCTAAATAAATAAGTCAGAACAAACTTTGCTTTC	37	6	94128889	TGTTCTGACTTATTTATTTAGATGTCTACCTGCACAAGCCAGCTCGTCCG	6	94185610	F			NA	TRUE	EPHA7	NM_004440	Body	chr6:94126272-94129677	Island			NA	6:94184852-94185615			TRUE
cg00044299	69758487	69758487	69758487	AATTCAAATATATCTTAAATAACTACTTCCTTTACATTTACAATATTCTC	0.01831	NA		II			AAGGGTTACTTGATTCAAATATGTCTTAAGTAACTGCTTCCTTTACATTTACAGTGTTCT[CG]CAGTCTTTGCCTTATAAAACTCATGCATTCAATGAAGAGCGGCTGCAAGAGTGAGCTAAT	37	18	24126361	ATTCAAATATGTCTTAAGTAACTGCTTCCTTTACATTTACAGTGTTCTCG	18	22380359	R			NA	NA	KCTD1	NM_001136205;NM_001142730;NM_198991	5'UTR;Body;5'UTR	chr18:24126780-24131138	N_Shore			TRUE		18:24126357-24126473	Unclassified_Cell_type_specific	NA
cg00044665	72716469	72716469	72716469	TTATTATTCCTTTATAAAAACTAAACTAACTACAAATAAACAAACCCTAC	3.96e-05	NA		II			GCAGGGTCCAGTGCCAGCCCTCTGTGGAGACAGCCATCCGGGGCCGAGGCAGCCGCCCAC[CG]CAGGGCCTGCCTATCTGCAGCCAGCCCAGCCCTCACAAAGGAACAATAACAGGAAACCAT	37	16	66400411	TATTGTTCCTTTGTGAGGGCTGGGCTGGCTGCAGATAGGCAGGCCCTGCG	16	64957912	F			NA	NA	CDH5	NM_001795	TSS200					NA				NA
cg00044729	73663432	73663432	73663432	ACTAACTCAACTTTCATACCTTTACACATAATATATCCTTTACCTCTTAC	0.000396574	NA		II			ATCTGAATTGAATCTTAAAGGATGACAGGGAGTTCACTGGATAGACAAAGTAGAGGAGGA[CG]TAAGAGGCAAAGGACACATCATGTGTAAAGGCATGAAAGCTGAGCCAGCCTATTATCTTG	37	22	40290976	CTGGCTCAGCTTTCATGCCTTTACACATGATGTGTCCTTTGCCTCTTACG	22	38620922	F			NA	TRUE	ENTHD1	NM_152512	TSS1500					NA				NA
cg00045118	47608423	47608423	47608423	CCTCTAATCAACCTACAAACTCAATAAACATAATAAACAAAAACATTCCC	0.000117489	NA		II			CCACTCAGGGTCCTCTGATCAGCCTGCAAGCTCAATGAACATGATAGACAGGAGCATTCC[CG]TTAACTCTTGCTATTCCTTCAGTCCTCAACATGTCCTTTACTTACTCTACACTTTCCATA	37	8	93076177	CGGGAATGCTCCTGTCTATCATGTTCATTGAGCTTGCAGGCTGATCAGAG	8	93145353	R			NA	NA	RUNX1T1	NM_175634;NM_175635;NM_004349	Body;5'UTR;TSS1500					NA				NA
cg00045762	71778430	71778430	71778430	AATCCTACCCATATAATATCTCTAACATTTCTACATCTTTCTAAATTAAC	0.0273516	NA		II			GCACATGAACAAACCTTTTTAAGAGATATTTCAAAAAAAAAAAAAGTCTGTGTCAAACAA[CG]TTAACCCAGAAAGATGCAGAAATGTCAGAGACATTACATGGGCAGGACTTGCGGTTGGCA	37	5	167181762	GTCCTGCCCATGTAATGTCTCTGACATTTCTGCATCTTTCTGGGTTAACG	5	167114340	F			NA	NA	ODZ2	NM_001122679	Body					NA				NA
cg00045900	24744509	24744509	24744509	CAAAAACATAAAACTACAAAACCAACTAAATAAAAAATACCAAAATAAAC	7.94e-06	NA		II			ACACCCACCACTGGTTCTCCCCATACTCCAGCCCCACAGACCCGCCCTGCACGACCCACA[CG]TCCACCCTGGCACCCTTCACCCAGCTGGCCCTGCAGCTCCATGTCCCTGAAACCTGTCAC	37	8	144892464	CGTCCACCCTGGCACCCTTCACCCAGCTGGCCCTGCAGCTCCATGTCCCT	8	144964452	F			NA	NA	SCRIB	NM_015356;NM_182706	Body;Body	chr8:144892920-144893468	N_Shore			NA				NA
cg00045902	24642342	24642342	24642342	AAAATTTATAAATATCTACTACCTAAAACACTTATCAAAAAACAATCACC	0.00047359	NA		II			AGAAGCTTCCTGAGGTTTGTGGGTGTCTGCTGCCTGAGGCACTTGTCAAGGAGCAGTCAC[CG]CAGGCACCACGAGATCGGCTCCGTTGCAGGGACACTGAGCCCAGCATCTACCCATGAGAG	37	10	134222218	AGGTTTGTGGGTGTCTGCTGCCTGAGGCACTTGTCAAGGAGCAGTCACCG	10	134072208	R			NA	NA	PWWP2B	NM_138499;NM_001098637	3'UTR;Body	chr10:134218268-134219615	S_Shelf			TRUE	10:134071822-134072232	10:134220916-134222370	Gene_Associated_Cell_type_specific	NA
cg00046026	71643385	71643385	71643385	ATTAAAAATCACCTCCAACTTAACACCCTCAAAACTACTCCTATCCTATC	0.00120683	NA		II			CTGTGGGCCACATTGAGGGTCACCTCCAGCTTGGCACCCTCAGGGCTGCTCCTGTCCTGT[CG]TGGGGGCCGCCCTGCTCAAGGTATAGGCCCGGCTGGTTGCAGCCCGTTCTCACCTGCTCC	37	20	61950761	TTGAGGGTCACCTCCAGCTTGGCACCCTCAGGGCTGCTCCTGTCCTGTCG	20	61421206	R			NA	NA	COL20A1	NM_020882	Body	chr20:61951346-61951549	N_Shore			NA				NA
cg00046499	59743503	59743503	59743503	ACCTTTACTACTAAATACTTCTCCTTTCAAAAATCAAAAACATAAAAATC	0.000717894	NA		II			TGTGAGACAATATCCTTGGCCACCACCGATATGGAAAACTAAGTCGCTCGCGACGGAAAG[CG]ATCCCCATGCCCCTGACTTTTGAAAGGAGAAGCATTTAGTAGTAAAGGTTTCGCAGCCAA	37	3	154146183	CCTTTACTACTAAATGCTTCTCCTTTCAAAAGTCAGGGGCATGGGGATCG	3	155628877	F			NA	NA	GPR149	NM_001038705	Body	chr3:154146347-154146965	N_Shore			TRUE	3:155628861-155629659			NA
cg00046623	60604412	60604412	60604412	TTTATTTTTATTATCACTACTTTTCTCTCCCTAAAAAAACCTATATAATC	0.0112754	NA		II			ACAAAAAATAATTTGTTTTTATTATCACTACTTTTCTCTCCCTAAGAAGGCCTATGTGAT[CG]GCCAGTTTATTTTATGAATTTATATCGAATGTATGGCCTCATATCAACAAAAGGGCCTTG	37	8	52320263	TTGTTTTTATTATCACTACTTTTCTCTCCCTAAGAAGGCCTATGTGATCG	8	52482816	R			NA	NA	PXDNL	NM_144651	Body	chr8:52321162-52322221	N_Shore			TRUE				NA
cg00046991	26724476	26724476	26724476	ACCACRTCCAACCCAATATATTTTCAAATAATTCCTTTATATATTTATTC	0.0169956	NA		II			AGGCATGGGCAACCACGTCCAGCCCAATGTATTTTCAAATAGTTCCTTTATGTATTTGTT[CG]TGCTGTTTTCTTCTATACACAATTCATGGCCCTGTCTCACCTGAACATCCCTCCCTATAC	37	17	30906423	CCACGTCCAGCCCAATGTATTTTCAAATAGTTCCTTTATGTATTTGTTCG	17	27930536	R			TRUE	NA	MYO1D	NM_015194	Body					NA				NA
cg00047185	36715401	36715401	36715401	TTATATATTATATACACACAAAATACTCTTCTAAACACAAAAAATACTCC	0.0286061	NA		II			ATTTTATATTCTTATATATTATGTACACACAAAATACTCTTCTAAACACAGAGAATACTC[CG]ATATCACCTAGGGTGTGTGTGCGTGTGCGTGTGTGTGCGTGTGTGTGTGGTTCTTTTCTG	37	19	54196849	CGGAGTATTCTCTGTGTTTAGAAGAGTATTTTGTGTGTACATAATATATA	19	58888661	R			NA	NA	MIR526B	NR_030190	TSS1500					NA				NA
cg00047532	34728496	34728496	34728496	ACAATAACATAATCTCACCTCAATACAACATCTACCTCCCAATCCCAAAC	3.17e-05	NA		II			GCTGGGTGTGGTGGCATGTGCCTGTGGTCCCAGCTGCTTGGGAAGGTGAGGCAGGAGGAT[CG]CTTGGGACTGGGAGGCAGATGTTGCATTGAGGTGAGATCATGCCACTGCACTCCAGCCTG	37	6	42882406	CGCTTGGGACTGGGAGGCAGATGTTGCATTGAGGTGAGATCATGCCACTG	6	42990384	F			NA	NA	PTCRA	NM_138296	TSS1500	chr6:42879279-42879623	S_Shelf			NA				NA
cg00047553	61635403	61635403	61635403	TCACTAATCCTCCTCAACACAAACCCTTTATAAAAATCAACCTTAAAAAC	0.00643599	NA		II			GCCTTCCTCTTTCACTAATCCTCCTCAGCACAGACCCTTTATGGGAATCAGCCTTGGGGA[CG]GTCAGGTCAGGTCCCTTCCCACAAGGCCATGTCTCAGGCTGTCTCTCTCAGTGGGGGGAA	37	6	33090304	CACTAATCCTCCTCAGCACAGACCCTTTATGGGAATCAGCCTTGGGGACG	6	33198282	R			NA	NA	HLA-DPB2	NR_001435	Body					NA				NA
cg00049033	14799369	57700401	14799369	CATAACCCTAAAAAATAAACCCAAACTAATAATAAAACAACAAAAAAACA	0.000179415	57700401	CGTAACCCTAAAAAATAAACCCAAACTAATAATAAAACGACGAAAAAACG	I	A	Red	GGGTGCGGTAGACGTAGCCCTGAAGGATGAACCCAGGCTGGTAGTAGGGCGGCGGGAGGG[CG]GGGGGACCTGTCAGTCAAGTCCAAAGCAGAAACGCGGCGCCGGATCCCAGTCAGAGGCCG	37	16	49317080	CGTAGCCCTGAAGGATGAACCCAGGCTGGTAGTAGGGCGGCGGGAGGGCG	16	47874581	R			NA	NA	CBLN1	NM_004352	TSS1500	chr16:49316997-49317263	Island			NA	16:47874384-47874860			NA
cg00049440	11793440	11793440	11793440	CCATATATCATTTTTAAACCACAAACCCAAAACCTCATCTTAAAAATATC	0.000173536	NA		II			ATCATTTTTTTCCATGTATCATTTTTAAACCACAGGCCCAAGACCTCATCTTAAAAGTAT[CG]AGGTATTACACCAAAAAATGACAACACTTTTCCAACTAACTCCAACAATACCCTCTCAAA	37	9	73026643	CATGTATCATTTTTAAACCACAGGCCCAAGACCTCATCTTAAAAGTATCG	9	72216463	R			NA	NA	KLF9	NM_001206	Body	chr9:73027330-73029184	N_Shore		CDMR	NA				NA
cg00049616	46802312	46802312	46802312	ATAAAAAATCRTCTTAACCRCACCTACRAACCAAACTAAATAAAAAATAC	0.00534271	NA		II			TATTTCCCCCCAGAAAGGTTAACATACTGAGGACAGAGAGGGCATGTGTAGGCGGCAGGG[CG]CACTTTTCATTTAGTCTGGTTCGCAGGTGCGGTCAAGACGATTCCTTATTGTCTTGGAGC	37	13	100308186	TAAGGAATCGTCTTGACCGCACCTGCGAACCAGACTAAATGAAAAGTGCG	13	99106187	F			NA	NA	CLYBL	NM_206808	Body	chr13:100310204-100310446	N_Shelf			NA		13:100308080-100309710	Unclassified	NA
cg00049664	56712442	47789427	56712442	ATAAAAAAATCCAACCACTACCAAACAAATAAAAACTACACAAAAAAACA	9.74e-08	47789427	ATAAAAAAATCCGACCGCTACCGAACGAATAAAAACTACGCGAAAAAACG	I	A	Red	GGCGCGTGGAGGGTGGGAGGATCCGGCCGCTGCCGGGCGGATGGGAGCTGCGCGAGGAGA[CG]GGCGCGCGTGGAGAGGGCGCGGGAGTTGGCATTCGGTGGTCCTGGCAGTTAGCTGAGCAC	37	16	66613334	GTGGGAGGATCCGGCCGCTGCCGGGCGGATGGGAGCTGCGCGAGGAGACG	16	65170835	R			NA	NA	CMTM2	NM_144673	TSS200	chr16:66612749-66613412	Island			NA	16:65170251-65171217	16:66612785-66613385	Unclassified_Cell_type_specific	NA
cg00049709	59720422	59720422	59720422	CCTAATATTTAAACTTATAAACCAATTTAAAAATATTTTCTCCTTCTACC	0.00775205	NA		II			CGCTTCTCATCCCTGATATTTAGACTTATGGGCCAATTTGGGGGTATTTTCTCCTTCTGC[CG]TGATGAATGCTTCTATGAAACAATGTCATCACAAGTCACCTACCTGCCCTGTCAGCTCAG	37	1	3057810	CGGCAGAAGGAGAAAATACCCCCAAATTGGCCCATAAGTCTAAATATCAG	1	3047670	R			NA	NA	PRDM16	NM_022114;NM_199454	Body;Body	chr1:3059050-3059268	N_Shore			NA	1:3047602-3047851			NA
cg00050618	67795457	67795457	67795457	TCAAAACAATAACTAATATACCCATTTCRCAAATAAAACAATAAAACTAC	6.43e-05	NA		II			CACCCAGTCATTCAAAACAATGGCTGGTGTGCCCATTTCGCAGATGAGGCAATGAGGCTG[CG]AGAGGTAGAGTGATTTTCCCTCGGTGACTCAACTGGGACGTAGCAGGTCGGGCAGTCAAG	37	16	27414418	CGCAGCCTCATTGCCTCATCTGCGAAATGGGCACACCAGCCATTGTTTTG	16	27321919	R			NA	NA	IL21R	NM_181079;NM_181078	TSS200;5'UTR					NA				NA
cg00050692	48657433	48657433	48657433	AAACACACAAATAAAAACCTACTATAACCAACTATAAACATAAAACCAAC	1.68e-05	NA		II			AGGTGACAGTGGGACACACAAATGGAAACCTACTGTGACCAGCTGTAGACATAAGACCAG[CG]GGAAGAGCATCCCTGGCCCCTCCATCCATCCTCCAGCTGAGGCATGTCTGCAGGGCAGAC	37	2	25524877	GACACACAAATGGAAACCTACTGTGACCAGCTGTAGACATAAGACCAGCG	2	25378381	R			NA	NA	DNMT3A	NM_022552;NM_175630;NM_175629	Body;Body;Body					TRUE		2:25524822-25525103	Unclassified	TRUE
cg00050938	65806423	65806423	65806423	ATTAAACAAAACTAAAAATCCAAACTAAAAAAACAAAAACCCCTCCAAAC	0.00863696	NA		II			TAACCATTGTCTTGTTCTGTGATGAGGGGAGGGGGGCACATGCTGAGTCTCCCAAGGCTG[CG]TCTGGAGGGGCCCCTGCTTCTCCAGCCTGGACCCCCAGCTTTGCCCAACACCAGCCCCTG	37	3	50296100	TTGGGCAAAGCTGGGGGTCCAGGCTGGAGAAGCAGGGGCCCCTCCAGACG	3	50271104	F			NA	NA	GNAI2	NM_002070;NM_001166425	3'UTR;3'UTR	chr3:50297440-50298097	N_Shore			NA				NA
cg00051590	32687405	32687405	32687405	CAAAAAACCTATCACATTAAAAAATAAAATACACATCATAAAAACACCTC	8.85e-07	NA		II			TGGCCCAGGTGCAGGGAGCCTGTCACATTGGGGGGTGGGATGCACATCATGAAGACACCT[CG]GGGATTTGCTGCTGACACATTAGGACGCTGATGGTGGAGAAGGATGGCACATGTTTAAGG	37	6	31759486	AGGGAGCCTGTCACATTGGGGGGTGGGATGCACATCATGAAGACACCTCG	6	31867465	R			NA	NA	VARS	NM_006295	Body	chr6:31763240-31763905	N_Shelf			NA		6:31758726-31760405	Gene_Associated	TRUE
cg00051623	74727303	74727303	74727303	AACCATAATATATTTTAACTAAACCTCTAACACCTAAAACAATATCRTCC	0.00894773	NA		II			GTTTATCTTTTGTTAGAATCCTCAAGCAGTGCATCTAGTCATTCATTTAGCAAACATATA[CG]GACGACATTGCTCTAGGTGCCAGAGGTTCAGTCAAAACATATCATGGTCCTTTCCCCTTT	37	11	104907029	CGGACGACATTGCTCTAGGTGCCAGAGGTTCAGTCAAAACATATCATGGT	11	104412239	F			NA	TRUE	CASP1	NM_001223;NM_033292;NM_033294;NM_033293;NM_033295	Body;Body;Body;Body;Body					NA				NA
cg00051662	56705406	56705406	56705406	ATTAAAAATCTAAATACAACCAAAAAAATACACATTACTAAATCACTAAC	0.000427436	NA		II			AGGAAATTTAGAACAAATACGATGATATCTTTAAAGAAAATGGCTTTGTGTAAGTATTGT[CG]TTAGTGATCTAGTAATGTGTATCTTTCTGGTTGTATTTAGACCTTCAACTCAAATGTCAG	37	10	96521086	TTGAAGGTCTAAATACAACCAGAAAGATACACATTACTAGATCACTAACG	10	96511076	F			NA	NA	CYP2C19	NM_000769	TSS1500					NA				NA
cg00052772	19705437	19705437	19705437	CRCTATACAAAACCTAACCTCCTTCCTACTCAACCTCTCTCTAAAATTCC	0.0246072	NA		II			CTGAACTGGTATCAGAGCTGGTCTTGCGAGGGGGCCGTTGGGGGCAATGGGAGAGAAGCA[CG]GAACCCCAGAGAGAGGCTGAGCAGGAAGGAGGCCAGGTTTTGCACAGCGAGGAAGTGCCT	37	6	33245804	CGGAACCCCAGAGAGAGGCTGAGCAGGAAGGAGGCCAGGTTTTGCACAGC	6	33353782	F			NA	NA	B3GALT4	NM_003782	1stExon	chr6:33244677-33245554	S_Shore			TRUE	6:33352687-33353910	6:33244505-33246488	Promoter_Associated	NA
cg00052903	49721310	49721310	49721310	TACCAAAAAAATTAAAACTCTAATAACRTCTAAAATTCAATTATAACACC	0.000139857	NA		II			AAAAGGTACAACTATGACTTGAACAAAGGTTTTAAAGGAACTGTGTCCAAGCAATCAGCA[CG]GTGTCATAATTGAACTTCAGACGTCATTAGAGTTTCAATCTTTTTGGTAAGACTATTGTC	37	12	11422897	CGGTGTCATAATTGAACTTCAGACGTCATTAGAGTTTCAATCTTTTTGGT	12	11314164	F			NA	NA	PRB3	NM_006249	TSS1500					NA				NA
cg00053393	18602421	18602421	18602421	ACTACAACAAAACAATTATCTACCCCCCAAATTCAAACACCTAAACCTCC	0.00224276	NA		II			AAGTGGGGAGTGGAGCCTTCGGAGGACTCCCGGGTCCGCCCCTGGCCAGGTGATGCGGGG[CG]GAGGCCTAGGTGCTTGAACCTGGGGGGCAGACAATTGTTCTGCTGCAGTGCCCACCAGGG	37	4	183064388	CTGCAGCAGAACAATTGTCTGCCCCCCAGGTTCAAGCACCTAGGCCTCCG	4	183301382	F			NA	NA	MGC45800	NR_027107	Body	chr4:183063396-183066370	Island			NA	4:183300631-183301663	4:183064216-183064765	Unclassified_Cell_type_specific	NA
cg00053728	20602500	20602500	20602500	AACCAAACAAAACTACCATATAATCTAAAAAAACRAAATCAATAAAAACC	0.0258388	NA		II			GGTACGTGGGTGGCCAAGCAGGGCTGCCATGTGATCTGGAAGAGCGGGGTCAGTGGGAGC[CG]CGAGGGAGCCGCTGGTATAATAGATGCTGGCAGGGACCGGCCGTGCAGAGAAGCCAGCTA	37	2	3464167	GCCAAGCAGGGCTGCCATGTGATCTGGAAGAGCGGGGTCAGTGGGAGCCG	2	3443174	R			NA	NA	TTC15	NM_016030	Body	chr2:3461654-3461863	S_Shelf			NA	2:3443049-3443218			NA
cg00054173	46770487	46770487	46770487	CCCCAATTACTAAATCCAATCAACCCTCCTACTACAATATCCCCTATAAC	0.00201465	NA		II			GCCTACTCCCTCCCCAGTTGCTGAGTCCAGTCAACCCTCCTGCTACAGTATCCCCTATAG[CG]CCATTCACCTGCCCTCCTCTGCTCCCTTGGCCAACATCTAGGTTCAGAACCTCATTGTCT	37	21	34542436	CCCAGTTGCTGAGTCCAGTCAACCCTCCTGCTACAGTATCCCCTATAGCG	21	33464306	R			NA	NA	C21orf54	NR_024102	Body					NA				NA
cg00054352	49665503	11683385	49665503	CCACAAATACCAATACCTCTAAAAAATACAAAATTAAACAACAAATACCA	0.025532	11683385	CCGCAAATACCGATACCTCTAAAAAATACGAAATTAAACAACAAATACCG	I	A	Red	ACCTCGCACCCTCCAGAGGTACCGGCACCTGCTGTCCAACCTCGCACCCTCCAGAGGTAC[CG]GCACCTGCTGTCCAACCTCGCACCCTCCAGAGGTACCGGCACCTGCGGGGCATGACACCA	37	13	114891672	CGGCACCTGCTGTCCAACCTCGCACCCTCCAGAGGTACCGGCACCTGCGG	13	113909774	F			NA	NA	RASA3	NM_007368	Body					NA	13:113908894-113909775			NA
cg00054774	31689451	31689451	31689451	TACTAAACTTACACATAATACATAAATAACTATAACCCCAATATACTTCC	0.000549923	NA		II			ATGCCAAGAAATGCAAGTCTTTGGAGATAAATTCTTGGTGAAATTCAGCTCTATGAGAGG[CG]GAAGCACATTGGGGTCACAGCTATTCATGTATCATGTGCAAGCTCAGTAAGTGTCCGATC	37	21	43373079	ACTGAGCTTGCACATGATACATGAATAGCTGTGACCCCAATGTGCTTCCG	21	42246148	F			NA	NA	C2CD2	NM_015500	Body	chr21:43373135-43374062	N_Shore			NA		21:43372665-43373338	Unclassified_Cell_type_specific	NA
cg00055359	67668381	67668381	67668381	AAAAAAAATCCCTAACCTTATCTACCCAACTACAAACCACTTACCCAAAC	0.0039454	NA		II			AGTAGCAACAGGGCACACGCTCCTGGTGAGCTGGGCGGGAGGTGGCAACAAGGGAGGGGC[CG]CCTGGGCAAGTGGCCTGCAGCTGGGCAGACAAGGTCAGGGATCTCCCCTACACGCGCAAG	37	2	134023210	GGGGAGATCCCTGACCTTGTCTGCCCAGCTGCAGGCCACTTGCCCAGGCG	2	133739680	F			NA	NA	NCKAP5	NM_207363;NM_207481	Body;Body	chr2:134023947-134024467	N_Shore			NA				TRUE
cg00055557	68810408	68810408	68810408	RTACCCTTACTTCACTATATCATTAAAATTAAAAACCATCCCAAACAACC	0.000128757	NA		II			TGCCCTCCACCCTCCCCAGAGCCACTTCGGGTGCGCGCTCTTGGGTAAAGGGGGGGTCAC[CG]GCTGTCTGGGATGGCTTCCAATTTTAATGACATAGTGAAGCAAGGGTACGTGAGGATCCG	37	20	53092474	CGGCTGTCTGGGATGGCTTCCAATTTTAATGACATAGTGAAGCAAGGGTA	20	52525881	F			NA	NA	DOK5	NM_018431;NM_018431	1stExon;5'UTR	chr20:53091733-53092993	Island		DMR	NA	20:52525175-52526604			NA
cg00055726	51792505	51792505	51792505	AAAATACTTTTTTCCCCTCAACTTATCTTCTCAATTCTCTAAAATAACAC	0.00097089	NA		II			CAGCCTGCAACACACGCCGCCAGCTTTAGAGCATCACGCTTCCTCACCACAAAAGTCACT[CG]TGCTATTCTAGAGAACTGAGAAGACAAGCTGAGGGGAAAAAAGCACCCCAGGATGTGCCT	37	9	136445425	CGTGCTATTCTAGAGAACTGAGAAGACAAGCTGAGGGGAAAAAAGCACCC	9	135435246	F			NA	NA	FAM163B	NM_001080515	TSS200	chr9:136444127-136444604	S_Shore			NA				NA
cg00055881	37699429	37699429	37699429	AACCACAAAATAACAATACTAACTTCCCRTCCACTTCTATTTTAAAAATC	0.00147345	NA		II			GCCTTTAGGAGGCCCCAGGTTCTGCTCAGGGTGGACCTCAGTAAAGGGGCACTCAGGGAG[CG]ACCCCCAAAACAGAAGTGGACGGGAAGCCAGCACTGCCACTTTGTGGCCTCGTTGCCATT	37	1	6153073	GCCACAAAGTGGCAGTGCTGGCTTCCCGTCCACTTCTGTTTTGGGGGTCG	1	6075660	F			NA	NA	KCNAB2	NM_003636;NM_172130	Body;Body					NA		1:6152884-6153094	Gene_Associated_Cell_type_specific	NA
cg00056002	55640474	55640474	55640474	TTTTAAATAAAAACCACTTCCATAAAACCAAAATTATTCTACTATAAAAC	0.0030828	NA		II			TCTGGGTCATCTTTTAGGTGGGAGCCACTTCCATGAGGCCAGAATTATTCTGCTGTGGGG[CG]GGGGCTCCGTGGGGAGTGACGGCGTGAGTTATTGTGGGGCGGGGTCTCCGTGGGGAGTGA	37	16	88933996	TTTAGGTGGGAGCCACTTCCATGAGGCCAGAATTATTCTGCTGTGGGGCG	16	87461497	R			NA	NA	PABPN1L	NM_001080487	TSS1500	chr16:88937055-88937387	N_Shelf			NA				NA
cg00056676	13769381	13769381	13769381	TAAAAAAAAATCTTACRACTAAAAAAACTTCCATCCTCAATATCTCCAAC	0.00204551	NA		II			TTACCTTGCGTGACGGCCAAGAGGCAGTAGTGAAGCAGAAAGCCTCCAGGTGTGTTGCAG[CG]CTGGAGACATTGAGGATGGAAGTTCCTCCAGCCGTAAGACCCCTCCTCAAACTCGGACAG	37	5	101631668	CGCTGGAGACATTGAGGATGGAAGTTCCTCCAGCCGTAAGACCCCTCCTC	5	101659567	F			NA	NA	SLCO4C1	NM_180991	1stExon	chr5:101632049-101632373	N_Shore		DMR	NA	5:101659402-101660241	5:101631594-101632481	Promoter_Associated_Cell_type_specific	TRUE
cg00056754	30703474	30703474	30703474	ATAACTAAACCAAATCTAACTAAATATTCCTTACTAATCTTTTACCCACC	2.59e-05	NA		II			TCCCGGTAACAGTGGCTGGGCCAGGTCTGACTGGATATTCCTTGCTGGTCTTTTGCCCAC[CG]GGACCTTCCTAGTCCTAGTTCCACTGAGGTGACATCACCAACACAACTTCTCCCCCAACA	37	1	167063958	TGGCTGGGCCAGGTCTGACTGGATATTCCTTGCTGGTCTTTTGCCCACCG	1	165330582	R			NA	NA	DUSP27	NM_001080426	TSS200					TRUE				NA
cg00057231	39789363	39789363	39789363	TTACTACRACCAATAAATAAAAAACCATCCAATAAAAACACAATATCAAC	0.00608839	NA		II			CCTCGCGGAAATTGCTGCGGCCAATGGATGAGGAGCCATCCAGTAAGAACACAATGTCAG[CG]GCGTAAAGGCGCGTGCAGGTCACTGGGGCGGGCAGGAGAGATCAGGGCCTCTTCTGGGAG	37	3	48631958	TGCTGCGGCCAATGGATGAGGAGCCATCCAGTAAGAACACAATGTCAGCG	3	48606962	R			NA	NA	COL7A1	NM_000094	Body	chr3:48631882-48632901	Island			NA	3:48606898-48607840			NA
cg00057272	74695407	74695407	74695407	AATTAATATAATCCATATTCTAAAATCATTTTCTATTCATAACAAATAAC	5.87e-05	NA		II			CATGAGTAATGAGTTGATGTGGTCCATGTTCTAAGGTCATTTTCTGTTCATGACAAATAA[CG]TTTTTCACTTACAGTAGTCATATAAAGTTTTTAAATTGTTCGTTTACATTTTCAAAAATC	37	8	135726252	GTTGATGTGGTCCATGTTCTAAGGTCATTTTCTGTTCATGACAAATAACG	8	135795434	R			NA	NA	ZFAT	NM_020863	TSS1500	chr8:135724770-135725552	S_Shore		CDMR	NA				NA
cg00058296	13785309	13785309	13785309	ATTCRACTAAACTCACTAATTTCAAAATAAACCCTCTCRATACRTTTAAC	0.020665	NA		II			AGCAGAGAGCGTCCTGAATTATTTCCAGCCCTTTCTGGGCCGCATCGAAATCATGGGAAG[CG]CCAAACGCATCGAGAGGGTCTATTTTGAAATCAGTGAGTCCAGCCGAACCCAGTGGGAGA	37	1	237947435	CGCCAAACGCATCGAGAGGGTCTATTTTGAAATCAGTGAGTCCAGCCGAA	1	236014058	F			NA	NA	RYR2	NM_001035	Body	chr1:237947187-237947448	Island			NA	1:236013787-236014376			NA
cg00058515	23687391	23687391	23687391	ACTAAACCAATATAACCCATATCCCTAAATCTTTCTCTTCCCTCTCTAAC	8.82e-05	NA		II			GACTTCTCTCTCTCAAAAAAAAGGAAAAATAAAAACAGAAAGATGCAACTCTTTAGTGTC[CG]TTAGAGAGGGAAGAGAAAGACTTAGGGACATGGGCTACATTGGTTCAGCATCTGTCATCC	37	2	80527798	CTGAACCAATGTAGCCCATGTCCCTAAGTCTTTCTCTTCCCTCTCTAACG	2	80381309	F			NA	NA	CTNNA2	NM_004389;NM_001164883	Body;Body	chr2:80529677-80530846	N_Shore			NA				NA
cg00058923	25657344	25657344	25657344	ACCTAAATAAAATCCAAAAATTTAAAACAAAACCRCACAATAACCTAAAC	0.00116941	NA		II			CTCAGCCCTGAATTTCTGCATGTCCACAGCTACAAGCAAGAAGGCTGCCACACAGCCTCA[CG]CTCAGGTCACTGTGCGGCCCTGCTCCAAACTCCTGGACCCCATCCAGGTCATCAGCTATT	37	1	161069167	CGCTCAGGTCACTGTGCGGCCCTGCTCCAAACTCCTGGACCCCATCCAGG	1	159335791	F			NA	NA	KLHDC9	NM_152366;NM_001007255;NM_001007256	Body;Body;5'UTR	chr1:161068062-161068801	S_Shore			NA				NA
cg00059161	38648350	40772411	38648350	TTACTAAAAACTCTACCAACAAACACCTTTACTAACACATCCCTAACCCA	7.25e-08	40772411	TTACTAAAAACTCTACCAACAAACGCCTTTACTAACACATCCCTAACCCG	I	A	Red	AAGTGTTCCAGGACACCAGCCACGGGAAGATAGAGGAAGTAGTTCTTCCTCAGGTTGAGC[CG]GGCCAGGGATGTGCCAGCAAAGGCGTCTGTTGGCAGAGTCCTCAGTAAGTTATTATTGAG	37	3	164907027	CGGGCCAGGGATGTGCCAGCAAAGGCGTCTGTTGGCAGAGTCCTCAGTAA	3	166389721	F			NA	NA	SLITRK3	NM_014926	Body					NA				NA
cg00059246	13727417	13727417	13727417	AAAAATCCACACTACAATCCCACCAAAACAAAACAAATTCTATTCCAACC	5.91e-05	NA		II			ATGGTTGGTGCAAGGGATGTAGACAGTTTCCTTCAGCTGTGAAGGAATGGAGAGGGAAGG[CG]GTTGGAACAGAATTTGTTCTGTTTTGGTGGGACTGCAGTGTGGACCCCCTACTTCCAGAG	37	12	54337929	GGGGTCCACACTGCAGTCCCACCAAAACAGAACAAATTCTGTTCCAACCG	12	52624196	F			NA	NA	HOXC13	NM_017410	Body	chr12:54338761-54339168	N_Shore		RDMR	NA				NA
cg00059643	56667363	56667363	56667363	CCTAAAAAAATAAATTATACCCAAAACTCTCCTCCTAAAAACCCAAACCC	1.32e-05	NA		II			TCCCAGCCCCTTTCCATGCCTTTCACTCCATTTGGCAAGCTCTGAGGGGGAGCCTGGGGA[CG]GGTTTGGGTCCCCAGGAGGAGAGCCTTGGGTATAATCTATTTTTCTAGGAGCCTCTTGCC	37	5	180662641	CGGGTTTGGGTCCCCAGGAGGAGAGCCTTGGGTATAATCTATTTTTCTAG	5	180595247	F			NA	NA	TRIM41	NM_201627;NM_033549	3'UTR;3'UTR	chr5:180661182-180661555	S_Shore			TRUE				NA
cg00059662	65634335	65634335	65634335	CRAAAAAAATCCRATTCAAATCTATAAAAAATTCAAAAAAAATCACCCAC	0.00564285	NA		II			CTTCACGTTGTCGGGGAAGGTCCGGTTCAGGTCTGTGGGAAATTCAGAAGGAATCACCCA[CG]GGTTTCTGTTCCACAAGCCTCCCACCCCTCCAGCTGCCCCGAGGGTGGCCACCTGGGTTC	37	13	114005317	GGGGAAGGTCCGGTTCAGGTCTGTGGGAAATTCAGAAGGAATCACCCACG	13	113053318	R			NA	NA	GRTP1	NM_024719	Body					NA	13:113052908-113053656			NA
cg00059699	64632459	64632459	64632459	CAAAAATAACTTCACTCATAACATAAAAACCTTTATATCAAAAACACTCC	0.000650785	NA		II			TCATAATTTTGCAGAGGTGGCTTCACTCATAGCATGAGAACCTTTGTGTCAGAAGCACTC[CG]TCCTGCTTCTCTGACCTCTTTTATCTGCCTACTCTCATTCACCATTTCACCTTTATGCTT	37	12	10455788	CGGAGTGCTTCTGACACAAAGGTTCTCATGCTATGAGTGAAGCCACCTCT	12	10347055	R			NA	NA	KLRD1	NM_001114396	TSS1500					NA				NA
cg00059911	17629375	17629375	17629375	AAACRAACAACACTTTACTCTCCTCCTATCCTTAATCCAAAAAAAATCCC	0.0149793	NA		II			GAGCCGGCCTCGAGCCAACGTGAGGCAGCGAAGCAGCGTCCTTCTTCCTCCGCCTGGGCT[CG]GGACCTTTCCTGGACCAAGGACAGGAGGAGAGCAAAGTGCTGCCCGCTCCCCATCTAAGC	37	12	113908960	CGGGACCTTTCCTGGACCAAGGACAGGAGGAGAGCAAAGTGCTGCCCGCT	12	112393343	F			NA	NA	LHX5	NM_022363	Body	chr12:113908887-113910681	Island			NA	12:112393271-112394144			NA
cg00059930	65716409	65716409	65716409	AACAATACRAACTACTCCTTATACACRATAAACTTAACAACTAACTTAAC	0.00213674	NA		II			GACCACAGGCAGGCAATGCGGGCTGCTCCTTGTGCACGGTGGGCTTGGCAGCTGGCTTGG[CG]TCTGCCCTGTGGCCCCTCTGTGCAGCGCGCTCATCGGTGGTGCCCCGAGCAACCCCGCTG	37	13	48894382	CGCCAAGCCAGCTGCCAAGCCCACCGTGCACAAGGAGCAGCCCGCATTGC	13	47792383	R			NA	TRUE	RB1	NM_000321	Body	chr13:48892635-48893857	S_Shore			NA	13:47791943-47792597	13:48894232-48894678	Unclassified_Cell_type_specific	NA
cg00060374	62705369	47603327	62705369	ACAAACCCAACACTAACAAAAAATCTATTACTACCACCAACATAAAACCA	0.000151142	47603327	ACAAACCCGACGCTAACGAAAAATCTATTACTACCACCAACATAAAACCG	I	A	Red	GGGGTCTCAGGCACAGGCCCGGCGCTGGCGGAGAGTCTGTTGCTGCCACCAGCATGAAGC[CG]AGCCCCGGGCCTCGGATCCCGCCCTGGTCTCCACGGGACGGGGCTACACCGGAGGGGCAC	37	1	1355235	CGGCTTCATGCTGGTGGCAGCAACAGACTCTCCGCCAGCGCCGGGCCTGT	1	1345098	R			NA	NA	LOC441869	NR_026871;NM_001145210	Body;Body	chr1:1355159-1356000	Island			NA	1:1344600-1345863	1:1355211-1356546	Unclassified_Cell_type_specific	NA
cg00060627	50796452	50796452	50796452	TAAAACCAAAAAAACCATAATATAAATACCRACTCCTCRTTTAAAAAATC	0.0283676	NA		II			ACGAGAAGGACTGGGACCAGAAAAGCCATGATGTGAGTACCGACTCCTCGTTTGAAGAGT[CG]TCTCTGTTTGAGAAAGAGCTGGAGAAGTTTGACACACTGCGATTTGGTCAGCTCCGGAAG	37	2	18112721	GGGACCAGAAAAGCCATGATGTGAGTACCGACTCCTCGTTTGAAGAGTCG	2	17976202	R			NA	NA	KCNS3	NM_002252	Body					NA	2:17976083-17976486			NA
cg00060641	34795384	34795384	34795384	AATCTCTAATAAACCTAATAAATAATAAATTAACACTCCCTCCCTCACTC	0.0262231	NA		II			ATCCTGGGCTTGGTCTCTGGTAAACCTGGTGAATGGTGGGTTAACACTCCCTCCCTCACT[CG]GTGTTGCTGGGAGGATAAGACAGAACATGTGGCGAGCAGGTGTCCAATAGCTGCCTCTTG	37	10	47135256	GTCTCTGGTAAACCTGGTGAATGGTGGGTTAACACTCCCTCCCTCACTCG	10	46555262	R			NA	NA	LOC728643	NR_003277	TSS1500					NA				NA
cg00060836	58707509	58707509	58707509	ATAAAATACTCATTTTCATCATTTACTTCTATTCATATTTTCTTAAACAC	2e-06	NA		II			ATCAACATCAAGTAAAATGCTCATTTTCATCATTTGCTTCTGTTCATGTTTTCTTGAACA[CG]TCTTCAATTTTCCTTCCAAAATGCTGCATGCCACACCTCCAAAACAAAGTCAGAAACCAC	37	8	67834312	CGTGTTCAAGAAAACATGAACAGAAGCAAATGATGAAAATGAGCATTTTA	8	67996866	R			NA	NA	SNHG6	NR_002599	Body	chr8:67837480-67837954	N_Shelf			NA				NA
cg00061413	64762384	64762384	64762384	AAACACRATCTAAAAAATTAAATTACTTACTAAACATTCTTTTTACCACC	7.36e-06	NA		II			TTTTGAAGATGGGGCACGGTCTGAGGAGTTAAATTGCTTGCTGAGCATTCTTTTTGCCAC[CG]ATCCATATTCCCCTGGGGCCCTCCAGCCCAGCTCTCTCCTTCTAAAGGGAAAACTGACTC	37	5	168007339	CGGTGGCAAAAAGAATGCTCAGCAAGCAATTTAACTCCTCAGACCGTGCC	5	167939917	R			NA	NA	PANK3	NM_024594	TSS1500	chr5:168006098-168006918	S_Shore			NA		5:168005860-168007466	Promoter_Associated	NA
cg00061520	20752464	20752464	20752464	ATTTTACTTTTATCCCACCCATTTTCTTTTAATAATTCTTATAACTTCAC	4.97e-05	NA		II			CTTATTGGTGAAAGGAATGAATTGGAAACAGAAAGTTCTTTTTTACCTTTATTAAATAAA[CG]TGAAGTCATAAGAACTACTAAAAGAAAATGGGTGGGATAAAAGTAAAACTAAATATGAAA	37	16	4070371	CGTGAAGTCATAAGAACTACTAAAAGAAAATGGGTGGGATAAAAGTAAAA	16	4010372	F			NA	NA	ADCY9	NM_001116	Body					TRUE				NA
cg00061629	11743340	11743340	11743340	TACRAATTAAAATCAAATAAAAAAACCRCTCTTTATTAAAATAACAAAAC	1.02e-05	NA		II			GCGCTGGCTGGTGCGGGTTGGGGTCAGGTGGAGAAGCCGCTCTTTGTTAAGGTGACAGAA[CG]TGCTGGGGGTGGGGGCCGGGGCCAGGGCCGGTGCAACTAGGGGGCCGCTGCCCTTTCCTG	37	11	44325258	GCGGGTTGGGGTCAGGTGGAGAAGCCGCTCTTTGTTAAGGTGACAGAACG	11	44281834	R			NA	TRUE	ALX4	NM_021926	Body	chr11:44325657-44326517	N_Shore			NA	11:44281482-44283093			NA
cg00062282	43801490	43801490	43801490	TATTCCTATCCAAAATCTTCCCTTAAACCTTAAACCACAATCCACATCAC	0.0108641	NA		II			CAGCCAGGCCTTGTTCCTGTCCAAAATCTTCCCTTGGGCCTTGAACCACAATCCACATCA[CG]GCAACCCTACCCTTCACTGCAGAGGACCCCAAAATTACCAGGTTCTGACAAGGTTGCCAA	37	22	50747369	GTTCCTGTCCAAAATCTTCCCTTGGGCCTTGAACCACAATCCACATCACG	22	49089941	R			NA	NA	PLXNB2	NM_012401	TSS1500	chr22:50745415-50746125	S_Shore			NA				NA
cg00063174	74759407	13800490	74759407	AAAACACAAAACTAAAAAATCTAACTCCACAAACAATTAATAACAACCCA	0.000312843	13800490	AAAACGCAAAACTAAAAAATCTAACTCCGCGAACGATTAATAACGACCCG	I	A	Red	GCCCTCACCTCTTTCACTCTAGACACCTCCAGAACACTCGCCCCCCGCGCGCCGGAGCCC[CG]GGTCGCCACCAACCGCCCGCGGAGCCAGACCTCCCAGCTCTGCGCCCCAGGACCGCGCGG	37	2	228736253	GGGGCGCAGAGCTGGGAGGTCTGGCTCCGCGGGCGGTTGGTGGCGACCCG	2	228444497	F			NA	NA	WDR69	NM_178821	TSS200	chr2:228736230-228736544	Island			TRUE	2:228444333-228444721	2:228736232-228736509	Unclassified_Cell_type_specific	TRUE
cg00063471	54694436	64606401	54694436	TAAAAAACAAAACAAACCAATAAAAATAAACAAAAACCAACAACAAATCA	0.0018728	64606401	TAAAAAACGAAACGAACCGATAAAAATAAACAAAAACCGACGACAAATCG	I	A	Red	TAGACCCGTGGGTGGGGGGCGGAGCGGACCGGTGGAGGTGGGCAGAGACCGGCGGCAAGT[CG]ACCCACGGCTGTGGGTGGCTTCCTCCTGTTGCTCAGTATCAGGGAGAGGCGGGGGAGGAC	37	15	51385970	TGGGGGGCGGAGCGGACCGGTGGAGGTGGGCAGAGACCGGCGGCAAGTCG	15	49173262	R			NA	NA	TNFAIP8L3	NM_207381	Body	chr15:51385861-51387203	Island			NA	15:49173154-49173314			TRUE
cg00063748	66770317	66770317	66770317	CTTCTCTTAACRCTCTTTCCTTCCACCTTTCCCAAAAATCCTAATTACAC	0.00783645	NA		II			AACCGTCCTGTCTTCTCTTGGCGCTCTTTCCTTCCACCTTTCCCAAGAGTCCTGGTTGCA[CG]TTTTAAGTCATATATTTTCGTCCCCCTGAAAATGATGGCAAGCCCAGTTTCTCCTGAGCA	37	1	3352986	CGTGCAACCAGGACTCTTGGGAAAGGTGGAAGGAAAGAGCGCCAAGAGAA	1	3342846	R			NA	NA	PRDM16	NM_199454;NM_022114	3'UTR;3'UTR	chr1:3351365-3351632	S_Shore			NA	1:3342670-3342867			NA
cg00065215	30794422	39720419	30794422	ATAAACTAACAACCTACAATCCAAAAAAAACTCCCTTAAACAACAAAACA	0.00201776	39720419	ATAAACTAACAACCTACGATCCGAAAAAAACTCCCTTAAACAACGAAACG	I	A	Red	GGGAGGGGGTGGGTGGGCTGGCAGCCTGCGATCCGGGAGGAGCTCCCTTGGGCAGCGAGA[CG]GCGCCGGGTCCCTGAATTAGACAGAGGCGAAGAGAGCGGCTCCGTGATCAAGTGCGCGCC	37	1	18959268	GTGGGCTGGCAGCCTGCGATCCGGGAGGAGCTCCCTTGGGCAGCGAGACG	1	18831855	R			NA	NA	PAX7	NM_013945;NM_002584;NM_001135254	Body;Body;Body	chr1:18956895-18959829	Island		DMR	NA	1:18831770-18832416	1:18958095-18959618	Unclassified_Cell_type_specific	NA
cg00065226	49642423	49642423	49642423	AACATTCTTTTACCTAAAATAAAACAACTATACRACCACTACCCAAACCC	0.000130602	NA		II			ATTTCTTCCCTGACATTCTTTTACCTAAAATAAGGCAACTGTGCGGCCACTGCCCAAACC[CG]GTTACACTCATATTATATGTGCCTATCACCCTGAGGAGTAATTTGATTCAGGTGTTCTAG	37	8	7189580	CGGGTTTGGGCAGTGGCCGCACAGTTGCCTTATTTTAGGTAAAAGAATGT	8	7176990	R			NA	NA	FAM66B	NR_027423	Body					NA				NA
cg00065957	43610453	43610453	43610453	RCACAACTTCTTCCCCTACRAACACAACTACATATAATAACTCAAATACC	1.46e-05	NA		II			TGCGACGACCCGCACAGCTTCTTCCCCTACGAGCACAGCTACATGTGGTGGCTCAGGTAC[CG]TCCCTGGCCCTCACCCTACCTTGAACCCCACTCCAGTCTCAGCGCCTTCACCCCAGCCTC	37	1	53099352	CGGTACCTGAGCCACCACATGTAGCTGTGCTCGTAGGGGAAGAAGCTGTG	1	52871940	R			NA	NA	FAM159A	NM_001042693	Body	chr1:53098629-53099303	S_Shore		CDMR	NA				NA
cg00066184	29653425	29653425	29653425	TTAAATCCCAATTCCATCTCTAAATCTCAATTTCCTCATCTATAAAATAC	0.00607818	NA		II			TTAGGCGGTTTATATAAAGCTTAGTAACAAACAAGACTTGGAGGTGATATGATTATTAAT[CG]TATTTTACAGATGAGGAAACTGAGACCCAGAGATGGAACTGGGATTCAAAACAATGTCTA	37	3	118663697	CGTATTTTACAGATGAGGAAACTGAGACCCAGAGATGGAACTGGGATTCA	3	120146387	F			NA	NA	IGSF11	NM_001015887;NM_152538	Body;Body					NA				NA
cg00066554	22768310	22768310	22768310	AAACTACRAAAATAACCCRACTTATAAAAATAACCCRAATACTAAAACTC	0.000411641	NA		II			GAGGCCCCAGCCTGCGGCCCTGGAGCGCTACAAGGCGCGGCGTTCAGACGCCATGGACAC[CG]AGTCCCAGTACTCGGGCTATTCCTACAAGTCGGGCCACTCCCGCAGCTCCCGCAAGCACA	37	1	160385636	AGCTGCGGGAGTGGCCCGACTTGTAGGAATAGCCCGAGTACTGGGACTCG	1	158652260	F			NA	NA	VANGL2	NM_020335	Body	chr1:160389103-160389386	N_Shelf			NA	1:158652225-158652520			NA
cg00066627	10742506	10742506	10742506	ATTAAAACTCAAATCTATCACAAACCAAAACACTATCTCCCATTTTACAC	0.0213854	NA		II			TCTTTCTCTTTTCCCTCACTATGAAAAGAACTGATTGGAATTTTTTTTTGTAGATGAGGC[CG]TGTAAAATGGGAGACAGTGCTTTGGCCTGTGACAGATCTGAGCTTTAATTCCAGATCAGC	37	6	25693139	TTAAAGCTCAGATCTGTCACAGGCCAAAGCACTGTCTCCCATTTTACACG	6	25801118	F			NA	NA	SCGN	NM_006998	Body					TRUE				NA
cg00066668	43610317	42698444	43610317	TAAAATAACAACCAAAAAAAAACACTCCTCATTTCCTAAACAAAATAACA	4.21e-05	42698444	TAAAATAACGACCGAAAAAAAACGCTCCTCATTTCCTAAACGAAATAACG	I	A	Red	TCGCTTCCTAGATGGGATGGCGGCCGGGAAGAGGCGCTCCTCATTTCCTAGACGGGATGG[CG]GCCGGGCAGAGACGCTCCTCACTTTCCAGACTGGGCAGCCAGGCAGAGGGGCTCCTCACA	37	12	131482233	TGGGATGGCGGCCGGGAAGAGGCGCTCCTCATTTCCTAGACGGGATGGCG	12	130048186	R			NA	NA	GPR133	NM_198827	Body					NA	12:130046848-130048486			NA
cg00067018	70810451	70810451	70810451	AAAACCCATCAATTACTCAAATAACAACCAACACCRAAAAACCAAAATTC	0.00161453	NA		II			CGGGGTGGGGGTGGGGGGGACGCGCTGTCGTCTGGGGTGTCTCCGCGTACTCCTGTTGGG[CG]AACCCTGGCTCTCCGGTGTTGGTTGTCACTTGAGCAACTGATGGGCTTCCAGGGGAAGTA	37	12	45445370	AAGCCCATCAGTTGCTCAAGTGACAACCAACACCGGAGAGCCAGGGTTCG	12	43731637	F			NA	NA	DBX2	NM_001004329	TSS1500	chr12:45444202-45445386	Island			TRUE	12:43731328-43731775			NA
cg00067274	53787471	53787471	53787471	AATATTTTACACTAAACCTAATTTACTTTATATACACCAAAAACTTCCAC	0.00149187	NA		II			GTTTTGTAAACAATGTTTTACACTGAGCCTGATTTACTTTATATACACCAAAAGCTTCCA[CG]TGGTATGATTGTTAAGGGCCAGCCTCTTCCCACTCCACCCACAAAGATACATTGAAATGC	37	4	155313256	CGTGGAAGCTTTTGGTGTATATAAAGTAAATCAGGCTCAGTGTAAAACAT	4	155532706	R			NA	NA	DCHS2	NM_017639;NM_001142552	TSS1500;Body					NA				NA
cg00067414	38806335	38806335	38806335	AAAATAACAAAAAAACCCCTTCCRCCTCCCTCRAAACTAAAATTAAAAAC	0.026682	NA		II			GGGACAACTTGGGGGTGGCAAGAAAGCCCCTTCCGCCTCCCTCGGAACTGGGATTAGGAA[CG]AGTTCCAGGATGCGGTTTCCCCGGCCAGCGGACCACCTCCTCCATTCACATCCTCTTCCC	37	6	151188081	GGGTGGCAAGAAAGCCCCTTCCGCCTCCCTCGGAACTGGGATTAGGAACG	6	151229774	R			NA	NA	MTHFD1L	NM_015440	Body	chr6:151186747-151188112	Island			NA	6:151228451-151229775	6:151186324-151188293	Promoter_Associated	NA
cg00067471	26702353	26702353	26702353	AAAACTTAATATTTTCTTAATATCTATCCAAAACCCTACATCCAATAAAC	0.02344	NA		II			GCCCAGAGCCGGAAACTTGATGTTTTCTTGATGTCTATCCAGGGCCCTGCATCCAATGAG[CG]CCCCAAAAATCTTTTTTTTTTTTTTTGTACAGACGGGTCGGGGGTGGGGGCGATCTACAC	37	19	1241377	AAACTTGATGTTTTCTTGATGTCTATCCAGGGCCCTGCATCCAATGAGCG	19	1192377	R			NA	TRUE	ATP5D	NM_001001975;NM_001687	TSS1500;TSS1500	chr19:1241619-1242569	N_Shore			NA		19:1241358-1242294	Promoter_Associated	NA
cg00067538	74615403	74615403	74615403	AAACRTAACCRAAACCCTTTTTATCTACATAAATCTACTCTAAACCTTCC	0.0134804	NA		II			GCTGGGATTACAGGCGTGACCGAAGCCCTTTTTATCTGCATAGGTCTGCTCTAAACCTTC[CG]CTGGGGCAGGAGCTCCTGCGCTTGCCAGTCCCACACTCACCCACCTGTGACACACTGGCG	37	2	231859946	GGCGTGACCGAAGCCCTTTTTATCTGCATAGGTCTGCTCTAAACCTTCCG	2	231568190	R			NA	NA	SPATA3	NM_139073	TSS1500	chr2:231854997-231855957	S_Shelf			NA				NA
cg00067720	57707413	57707413	57707413	CCTTATAAACTCTTCCATTCCATTAAATTCAACCTTACCTAATTATAACC	0.0064046	NA		II			TTTTGATTTGTCCTTGTGAGCTCTTCCATTCCATTGAATTCAGCCTTGCCTAATTGTGGC[CG]ATTGCCAAATCCCTAGCATGTTTCCTCTTCTGAATCACAGACCAGGGTTTCATCAGCCAC	37	5	67521141	CGGCCACAATTAGGCAAGGCTGAATTCAATGGAATGGAAGAGCTCACAAG	5	67556897	R			NA	NA	PIK3R1	NM_181523	TSS1500					TRUE				NA
cg00067884	21704309	21704309	21704309	CTAACCTCTCAAAACTACAACTAAAAACTCTTTACATAAAAATATAACCC	0.000809305	NA		II			TGTGAACACACCGACCTCCAACTCTAAGACCAGCATCAACTCCTCCTATCACAGCCAGCA[CG]GGCCACACCTCTATGCAAAGAGTCCTCAGCTGCAGCTCTGAGAGGTCAGCGAGGCCATGC	37	15	63970198	CGGGCCACACCTCTATGCAAAGAGTCCTCAGCTGCAGCTCTGAGAGGTCA	15	61757251	F			NA	NA	HERC1	NM_003922	Body					TRUE				NA
cg00068153	74612495	74612495	74612495	TTATTTTAACTCAAAAAACTAAAAACTACTTTAACAATCCCCTAAATTCC	0.0159688	NA		II			CCCTGCTCACTTTGTTTTAGCTCAGAAAACTAGAAGCTGCTTTAGCAATCCCCTGAGTTC[CG]CCAAATTTTATGAACACCCTCCCCCTACCCCACCACCACAAAAGAGATAACACAGAAGGG	37	1	201028602	TGTTTTAGCTCAGAAAACTAGAAGCTGCTTTAGCAATCCCCTGAGTTCCG	1	199295225	R			NA	NA	CACNA1S	NM_000069	Body					TRUE				NA
cg00068160	36794476	36794476	36794476	CRTATTACATACACRCTATTCAAATATAAAATCTAAAATAACTAACACAC	0.0267873	NA		II			GAGGCGAGGCTGCTCAGAGCCATCCCACTCCCAGAAACGAATGACACAAGCAGCTTTTCC[CG]TGTGCCAGCCATTTCAGACCTCACATTTGAACAGCGTGCATGCAACACGGACCGGGAGGG	37	13	95362971	GTGTTGCATGCACGCTGTTCAAATGTGAGGTCTGAAATGGCTGGCACACG	13	94160972	F			NA	NA	SOX21	NM_007084;NM_007084	1stExon;3'UTR	chr13:95363152-95366051	N_Shore		CDMR	NA	13:94160830-94161060			NA
cg00068377	28709417	35766424	28709417	AAAAAATAATCTATATCATATTCCAATCAAAAATATTTCTAAACTCTTCA	0.025491	35766424	AAAAAATAATCTATATCGTATTCCAATCGAAAATATTTCTAAACTCTTCG	I	A	Red	TTCTCCACTGGGGCCGGAAGAGGAGCTCTCGGACCCCTCCCTCCTGCCCTCAGCCCTCTC[CG]AAGAGCTCAGAAACATCTCCGATTGGAACACGACACAGACCATCCTTCCCAGAGCAGCAG	37	1	3275180	GAAGGATGGTCTGTGTCGTGTTCCAATCGGAGATGTTTCTGAGCTCTTCG	1	3265040	F			NA	NA	PRDM16	NM_022114;NM_199454	Body;Body	chr1:3275029-3275284	Island			NA	1:3264890-3265144			NA
cg00068433	28690314	28690314	28690314	CCCTTAATACCCAAAATCTATAAAAAATTAATTCTAAAACCCTCCCATAC	1.2e-05	NA		II			AGTACAGTTGTCCCTTGGTACCCAGAATCTGTGGGGAATTGGTTCTAGAACCCTCCCATA[CG]AAAATCCATGGCTGCTCCAGTCCCTTATACAAAATGTCATAGTGTTTGCTATAACCTTTG	37	1	16540130	CGTATGGGAGGGTTCTAGAACCAATTCCCCACAGATTCTGGGTACCAAGG	1	16412717	R			NA	NA	ARHGEF19	NM_153213	TSS1500	chr1:16543683-16544307	N_Shelf			NA				NA
cg00069417	56638370	56638370	56638370	CACAAAAACCTAAAAATCACCCCAATAAAACRAACAAACAAAAAATATAC	2.4e-12	NA		II			GGAGGGAGCTCAGCCTCCTGCGTGTTCCGGGGGGTCCCTGCTACCCCTTCCAGGCCCTCC[CG]CACATTCCCTGCCTGTTCGCCCTACTGGGGTGATTCTCAGGTCCCTGTGAGGCCCGCCTG	37	16	87874279	ACAGGGACCTGAGAATCACCCCAGTAGGGCGAACAGGCAGGGAATGTGCG	16	86431780	F			NA	NA	SLC7A5	NM_003486	Body					NA	16:86431680-86431927			NA
cg00069967	20750357	68621469	20750357	TCCACTTCTTAAACTAAAACATCTTATCACCTCCCAACTTAAAACCTACA	0.0186838	68621469	TCCACTTCTTAAACTAAAACATCTTATCGCCTCCCGACTTAAAACCTACG	I	C	Grn	TGGCCACCACGTTCCACTTCTTGAGCTAGAACATCTTGTCGCCTCCCGACTTGGAGCCTG[CG]CTCCTGGAGTGAGAGGTCAGGGCGTAGGGTTCCTCGCCGTCTTCCACGTCGGCCATGGTA	37	3	57505680	CGCAGGCTCCAAGTCGGGAGGCGACAAGATGTTCTAGCTCAAGAAGTGGA	3	57480720	R			NA	NA	DNAH12	NM_178504;NM_198564	Body;Body					NA	3:57480699-57480835			NA
cg00070235	32765320	69774387	32765320	AACCCCAAACCAAACAACTAATAAAAAAATACCAAAAAACAAATCCAACA	0.0231938	69774387	AACCCCAAACCAAACGACTAATAAAAAAATACCAAAAAACAAATCCGACG	I	A	Red	GGCTCGGGGGTGCCCACAGGCAGGGCCGGCTTCTGCTCAGAGCGCAGCTTCCAGCAAGCC[CG]CCGGACCTGCTTTCTGGCATTTTCTCACCAGCCGCTTGGCCTGGGGCTCCTCGCCTTGCA	37	16	1682446	CGCCGGACCTGCTTTCTGGCATTTTCTCACCAGCCGCTTGGCCTGGGGCT	16	1622447	F			NA	NA	CRAMP1L	NM_020825	Body					NA	16:1622380-1622540			NA
cg00070318	71713504	71713504	71713504	AAACCTTAAAAAATTCAAATAAAATAACTTCTCCCCACCCCTCTACCCCC	0.00111486	NA		II			GTCCCGGGTCCCGGCACAGACCCGGGAGGAGGGCGCGGACCAAGACTTGGGGGGAGGGGA[CG]GGGGCAGAGGGGTGGGGAGAAGTTATTCCACTTGAACTCCCCAAGGCTCTACTAGTGTAG	37	6	166581272	CGGGGGCAGAGGGGTGGGGAGAAGTTATTCCACTTGAACTCCCCAAGGCT	6	166501262	F			NA	NA	T	NM_003181	5'UTR	chr6:166579973-166583423	Island			NA	6:166499825-166503443			NA
cg00070460	42698334	42698334	42698334	AATTCCTAACTAACAATAACACACAAAACAAATATTCAATTTCCTCCCAC	2.14e-05	NA		II			CCAGGAGGCAGAATTCCTGACTAACAGTGGCACACAAAGCAGGTGTTCAGTTTCCTCCCA[CG]CCAAAGCCTGGAGACAGGGAGCCTGCGGCCCCGCTGCCCTCTCCACAGCCACGAGGGTCC	37	4	1227676	ATTCCTGACTAACAGTGGCACACAAAGCAGGTGTTCAGTTTCCTCCCACG	4	1217676	R			NA	NA	CTBP1	NM_001328;NM_001012614	Body;Body	chr4:1229249-1229501	N_Shore			TRUE	4:1217035-1217838	4:1227194-1228669	Gene_Associated	TRUE
cg00070529	65762301	65762301	65762301	ATTATCAAACAATAAAACTAATCCTAACTAAATTTATTAAATATTACCTC	0.00435345	NA		II			ATAAGAAAATAGTTGTCAAGCAGTAGAACTGGTCCTGACTGAATTTATTAAGTGTTACCT[CG]TAATCTATTCCTTCCTTTACAAACTTTTACATTATTACACTAAGAAAATACAGGTGTCTA	37	13	43986655	CGAGGTAACACTTAATAAATTCAGTCAGGACCAGTTCTACTGCTTGACAA	13	42884655	R			NA	NA	ENOX1	NM_017993;NM_001127615	Body;Body					TRUE				NA
cg00070680	24782416	24782416	24782416	AAAAAAATACTAACCCAACRTCRACAACTAAACTCAAAACCAAAATAAAC	6.93e-06	NA		II			ACTCGAGTGGCCGCGCCCTGGGTCCTGCACCGTGAGGCTGGGGGGACCAGGACCGGCGGG[CG]CCCACCTTGGTCCTGAGCCCAGCTGCCGACGCTGGGCCAGCACCCTCTCCACCGCCGCCC	37	7	137531956	AGAGGGTGCTGGCCCAGCGTCGGCAGCTGGGCTCAGGACCAAGGTGGGCG	7	137182496	F			NA	NA	DGKI	NM_004717	TSS1500	chr7:137531125-137532382	Island			TRUE	7:137181705-137182968	7:137531168-137531966	Unclassified_Cell_type_specific	TRUE
cg00070870	17779341	17779341	17779341	AAAACAACAACTACTTTATAAAATAAATCCCCAACAATATCAAAACAACC	9.25e-08	NA		II			CGTGCAGAACAAGAACAGCAGCTACTTTGTGGAATGGATCCCCAACAATGTCAAGACAGC[CG]TCTGTGACATCCCACCTCGTGGCCTCAAGATGGCAGTCACCTTCATTGGCAATAGCACAG	37	6	30691895	CGGCTGTCTTGACATTGTTGGGGATCCATTCCACAAAGTAGCTGCTGTTC	6	30799874	R			NA	NA	TUBB	NM_178014	Body	chr6:30687941-30688213	S_Shelf			NA	6:30799539-30800046			NA
cg00070899	54673344	58701351	54673344	AACATACAACTAAAAAAATAACAATCAAAACCTAACAAAAAACCAAAACA	0.00611211	58701351	AACGTACGACTAAAAAAATAACGATCGAAACCTAACAAAAAACCAAAACG	I	T	Red	CGGTTGTTGTCCAGCGTGCGGCTGGAGAAGTAGCGGTCGAAGCCTGGCAGGGAACCAGGA[CG]TCAGGGCCTCACTGGCCTTCTTCCCCACCAGCCCCAGCCCTCCCCGCCTCCCCCAGGATA	37	6	34024479	CGTCCTGGTTCCCTGCCAGGCTTCGACCGCTACTTCTCCAGCCGCACGCT	6	34132457	R			NA	NA	GRM4	NM_000841	Body	chr6:34024201-34024457	S_Shore			NA	6:34132180-34132458			TRUE
cg00071210	74662381	74662381	74662381	CCACATCCATAACTCTATCATTAAAATTTAACTCTTTAAAAAAACTACCC	0.000831628	NA		II			TAAGAGGAAGCCCACATCCATGGCTCTGTCATTGGAGTTTAACTCTTTGGGGAAACTACC[CG]CAAACCTCTTAGCCAAAGGCAGTCCATTAAACCTACCCACTCATTCAGAGGATTCCCTTT	37	6	148736942	CGGGTAGTTTCCCCAAAGAGTTAAACTCCAATGACAGAGCCATGGATGTG	6	148778635	R			NA	NA	SASH1	NM_015278	Body					TRUE				NA
cg00071618	12709479	12709479	12709479	CTAACTATACATAAACTTCATCTAAATTACTTTAAAAAATACAAATACCC	5.61e-05	NA		II			TCACTTTAACCCTAGCTGTGCATGAGCTTCATCTAGGTTGCTTTAGAAAATGCAGATGCC[CG]GGCCCCACCCACAGGTGCTGATTGAGGTCCTCTGGGTACAGCCTGGGCATTGGGATTCTT	37	16	87645667	TAGCTGTGCATGAGCTTCATCTAGGTTGCTTTAGAAAATGCAGATGCCCG	16	86203168	R			NA	NA	JPH3	NM_020655	Body	chr16:87648086-87648688	N_Shelf		CDMR	NA				NA
cg00071869	39634359	16801455	39634359	TAACCAACATAACAAAATCCATCTTTACTTAAAATACAAAAATTAACCCA	0.000702392	16801455	TAACCAACATAACGAAATCCGTCTTTACTTAAAATACAAAAATTAACCCG	I	A	Red	TCGAGACCAGCCTGGCCAACATGGCGAAATCCGTCTTTACTTAAAGTACAAAAATTAGCC[CG]GCATGGTGGCGGGTGCCTGTAATCCCAACTACTCTGGAGGCTGAGGCAGGAGAATTGCTT	37	3	141599902	CGGGCTAATTTTTGTACTTTAAGTAAAGACGGATTTCGCCATGTTGGCCA	3	143082592	R			NA	NA	ATP1B3	NM_001679	Body	chr3:141594486-141596288	S_Shelf			NA				NA
cg00071887	10710305	10710305	10710305	TAAATAAAACTCTAACAAACAAAACRAAACTAAAATATCAACACCACCCC	5.9e-05	NA		II			GAGAAGCCAGTGAGCAAGGTGGAGACCAGGGATGCTGTGACCAAAGCAGAGAGGAATGGG[CG]GGGTGGTGCTGACACCCCAGCCCCGTTCTGCCTGCCAGAGCCCCACTTACCAGGCCCGAG	37	15	74218529	CGGGGTGGTGCTGACACCCCAGCCCCGTTCTGCCTGCCAGAGCCCCACTT	15	72005582	F			NA	NA	LOXL1	NM_005576	TSS1500	chr15:74218696-74220373	N_Shore			NA		15:74218389-74218530	Unclassified_Cell_type_specific	NA
cg00072957	28739418	28739418	28739418	CTAATTCCATCAACCAAAAAACCATTCAAAACTTCTTAAAATAACAATCC	0.000136179	NA		II			TGGGGTGTGTCTGTGGCAGAAGCATTGATCTTAAACATTAAATAAGTGGAATTCACTTGA[CG]GACTGTTATTCCAAGAAGTTTTGAATGGCTCTCTGGCTGATGGAATCAGTGCAGTTGTGA	37	8	48573717	CGGACTGTTATTCCAAGAAGTTTTGAATGGCTCTCTGGCTGATGGAATCA	8	48736270	F			NA	NA	KIAA0146	NM_001080394	Body					TRUE				NA
cg00073003	50615430	50615430	50615430	AACAAAACATTTTACRTTCACATCRATTAACAACTTACATCCCAATTCAC	7.8e-05	NA		II			GGCAAAATAATTGTGCTGGATTCTCACACACACAGAAATATCGACCATCACCCTCCCCCG[CG]TGAACTGGGATGCAAGTTGCTAACCGATGTGAACGCAAAATGCCTTGTTCATTATTCCTG	37	13	112724583	ACAAGGCATTTTGCGTTCACATCGGTTAGCAACTTGCATCCCAGTTCACG	13	111772584	F			NA	NA	SOX1	NM_005986;NM_005986	1stExon;3'UTR	chr13:112726281-112728419	N_Shore			NA	13:111772455-111772585	13:112724492-112724761	Unclassified_Cell_type_specific	NA
cg00073010	26779448	26779448	26779448	CTAATTACCTCCTAACCCCCRACRACCTATAAATAATAACTACTAAAAAC	2.11e-07	NA		II			CGGGGCCGTCTCTAATTACCTCCTGACCCCCGGCGGCCTGTGAATAATGGCTACTGAGGG[CG]CTCGCAGGGGCTGCTAAGAAGGAAACGCGGGGCGCGAGAGGCGCGGCGCGCGCGGGAGCG	37	17	17627194	CGCCCTCAGTAGCCATTATTCACAGGCCGCCGGGGGTCAGGAGGTAATTA	17	17567919	R			NA	NA	RAI1	NM_030665	5'UTR	chr17:17625605-17628500	Island			NA	17:17566331-17568400			NA
cg00073384	49678454	49678454	49678454	ATCACTATCTAACTCTAAATATTTTCTTTTAACTATTATAACTTATAACC	5.69e-07	NA		II			TTCTTCTATATATCACTGTCTGGCTCTGAATGTTTTCTTTTGGCTGTTATGGCTTATGAC[CG]CTATATTGCTATTTGCCACCCTCTAAGATATACCAATCTCATGAATCCTAAAATTTGTGG	37	1	248343651	CGGTCATAAGCCATAACAGCCAAAAGAAAACATTCAGAGCCAGACAGTGA	1	246410274	R			NA	NA	OR2M2	NM_001004688	1stExon					NA				NA
cg00074145	37686404	56675377	37686404	CACTAACACACTAAAATAATCAAAAAAATCAAACCTATCCTCATCAATCA	0.000134491	56675377	CACTAACACACTAAAATAATCGAAAAAATCAAACCTATCCTCGTCGATCG	I	A	Red	GTGCACGTGCACTCAGATACTCACACAAAGCCGCGTGGAGGGACGAAAAGATCAACCACC[CG]ATCGACGAGGATAGGTTTGATCTTTTCGATTACCTCAGTGTGCCAGTGTATATTCCCGGC	37	15	53075505	CACTGGCACACTGAGGTAATCGAAAAGATCAAACCTATCCTCGTCGATCG	15	50862797	F			NA	NA	ONECUT1	NM_004498	Body	chr15:53076187-53077926	N_Shore		CDMR	NA	15:50862711-50862856			TRUE
cg00074348	65790306	65790306	65790306	AATAACTAAAACTCAACTCCTACTTTTATTCCATCTCACTATTACCCAAC	0.00101629	NA		II			ATTTTTTTTAAAAAATACGCACCCTTTCCACAACCTTGAAGAGTTGGGGAAGCCACCTGA[CG]TTGGGTAATAGTGAGATGGAACAAAAGCAGGAGCTGAGCCTTAGCCACTTCCAAGGCAAA	37	11	57006273	GTGGCTAAGGCTCAGCTCCTGCTTTTGTTCCATCTCACTATTACCCAACG	11	56762849	F			NA	NA	APLNR	NM_005161;NR_027991	TSS1500;TSS1500					NA				NA
cg00074746	26747342	26747342	26747342	AAATAACAAAATCATTAAATCACTTAATACTATCCACTAAATTAATCCTC	0.000557893	NA		II			CAATTCTCTTAAGGTAGCAGAGTCATTGAGTCACTTAATACTATCCACTGAATTGATCCT[CG]TTTAAAATTCAAAATTCAGTATTCATCAAGATTCTTAGGTTATGTACAATGTAATTATTT	37	6	116781794	CGAGGATCAATTCAGTGGATAGTATTAAGTGACTCAATGACTCTGCTACC	6	116888487	R			NA	NA	FAM26F	NM_001010919	TSS1500	chr6:116783067-116783678	N_Shore			NA				NA
cg00074771	30667312	30667312	30667312	TTAAAAATATAATCCTTCTACAAATTTTCTTTATTTTAATCTTCTTACAC	0.00149545	NA		II			AGCTAGACCAGCTTATGTGCCCCAAATCCCTATCAGAAAAGAATTCTAACAATGAAGTGG[CG]TGTAAGAAGACTAAAATAAAGAAAACTTGCAGAAGGATTATACCTCCAAAGATGAAAAAC	37	15	44120341	TGGAGGTATAATCCTTCTGCAAGTTTTCTTTATTTTAGTCTTCTTACACG	15	41907633	F			NA	NA	WDR76	NM_024908;NM_001167941	Body;Body	chr15:44119074-44119277	S_Shore		RDMR	NA		15:44120191-44120422	Promoter_Associated_Cell_type_specific	NA
cg00075507	56733315	56733315	56733315	CAAACTACRACAATTCCACTATCCCCTTCCACTTTCACTAAACAAAAACC	1.03e-07	NA		II			GCCAAGCTCCCCAAGCTGCGGCAATTCCACTGTCCCCTTCCACTTTCACTGGGCAGAGAC[CG]CGTGGCGCGCATTGGGCTGGGCGTGATCCTGAACCTGGCGAAGGAACGCGAACCCGTAGA	37	17	26708226	AAGCTGCGGCAATTCCACTGTCCCCTTCCACTTTCACTGGGCAGAGACCG	17	23732353	R			NA	NA	SARM1	NM_015077	Body	chr17:26708225-26708805	Island			NA	17:23732353-23732911			NA
cg00075844	73635389	15647464	73635389	AAACAAAATAACCAAACAAAAAAACCCCCCACCTCCCAAATAAAATAACA	7.92e-06	15647464	AAACGAAATAACCGAACAAAAAAACCCCCCACCTCCCAAATAAAATAACG	I	A	Red	TCCTTACTTCCCAGACGGGGTGGCCGGGCAGAGGGGCCCCCCACCTCCCAGATGGGGTGG[CG]GCCGGGCAGAGGGGCTCCTCACCTCCCAGACGGGGCGGCTGGGCAGAGGCGCCCCCCACC	37	3	51641812	AGACGGGGTGGCCGGGCAGAGGGGCCCCCCACCTCCCAGATGGGGTGGCG	3	51616852	R			NA	NA	RAD54L2	NM_015106	Body					NA	3:51616690-51617755			NA
cg00075920	65631479	65631479	65631479	AACTCCACCAAAATACCCTTTTCCTAAATAACAACTATCATTTATATAAC	0.0149101	NA		II			CTTCAGTTCTCAGCTCCACCAAAGTACCCTTTTCCTGGATGACAGCTGTCATTTATATGG[CG]TTGAACTGTGTGCCTAGCGCTGCACAAGTGTTTGCACTTTCTCCTTGAATCCCCACAGCT	37	5	177026190	CGCCATATAAATGACAGCTGTCATCCAGGAAAAGGGTACTTTGGTGGAGC	5	176958796	R			NA	NA	B4GALT7	NM_007255	TSS1500	chr5:177026715-177027519	N_Shore			NA		5:177026146-177026329	Unclassified_Cell_type_specific	NA
cg00075956	66687407	66687407	66687407	TTTTAAAAAAACACCTTTCRATACAATCTCCTCTAACTCAAAAAAACTCC	2.2e-05	NA		II			TCACATAAGAAGGCGGTGGGGCTGAGTCCGAGGCCGGATGTGAGGGGTGGACTCTGTAAA[CG]GAGCCTCCCTGAGTCAGAGGAGACTGCACCGAAAGGTGCCCTCTCAAAAGGACTGTGCAA	37	10	1726078	CGGAGCCTCCCTGAGTCAGAGGAGACTGCACCGAAAGGTGCCCTCTCAAA	10	1716078	F			NA	NA	ADARB2	NM_018702	Body					NA	10:1716031-1716110			NA
cg00076313	39750392	39750392	39750392	AATCCCCAACCTCTCTAATTTATTCTTAAAATATAACRTACCTACAATCC	0.00707913	NA		II			GTGTGTCAGGAAGTCCCCAGCCTCTCTGATTTGTTCTTGAGGTGTGACGTACCTGCAGTC[CG]ACACGTGTGACTGACAGCTGGTGGCTCCGGCAGGTGGGGTCTTCCAGCAGCTGAGACGGC	37	7	1748610	CGGACTGCAGGTACGTCACACCTCAAGAACAAATCAGAGAGGCTGGGGAC	7	1715136	R			NA	NA	ELFN1	NM_001128636	TSS200					NA				NA
cg00076538	68637392	63756419	68637392	CAATCCTATCACTAATAACTACAAATTTCCTCTACAAAACACTTCCTACA	0.000243573	63756419	CGATCCTATCGCTAATAACTACAAATTTCCTCTACGAAACACTTCCTACG	I	A	Red	AGGGGGCGGGCGCGGTCCTGTCGCTAGTGACTGCAGATTTCCTCTGCGGGGCACTTCCTA[CG]GCCTTTGATCTTTCCCCAGGAACTGCCGAGGGCCGCGTTTGCCTCTAAGTTTATTCCCTC	37	5	38257555	CGGTCCTGTCGCTAGTGACTGCAGATTTCCTCTGCGGGGCACTTCCTACG	5	38293312	R			NA	NA	EGFLAM	NM_152403	TSS1500	chr5:38257825-38259136	N_Shore			NA	5:38293237-38293350			NA
cg00076555	41751424	41751424	41751424	CCACAACCTTAAAAAAAAACTTTAACTAAAAACTAAAAACCCTAAACTCC	0.00151327	NA		II			CAGAAGTTTTTCCACAGCCTTGGAGAGGGGCTTTGACTGAGGGCTGGGGGCCCTGGGCTC[CG]TTTCCTTCACATTCCAGCTGGCCCGGATCCCTCTGTGGCACAGGGCCCTGCCCGTCACAT	37	3	49705435	CGGAGCCCAGGGCCCCCAGCCCTCAGTCAAAGCCCCTCTCCAAGGCTGTG	3	49680439	R			NA	NA	BSN	NM_003458	3'UTR					TRUE				NA
cg00077547	32605476	32605476	32605476	AAACACCAACATCTAATTAATCACTTTAAAATAAATCATCAATATAAAAC	0.00438234	NA		II			TTCGCGGCAAAGAACACCAGCATCTGATTGATCACTTTGAAATAGGTCATCAGTATGAGA[CG]CACGACAAGGAAGGGGCCATCTTGTATGAAGACGCTGATTCCGATGTTCCACAGATCGGC	37	10	63170372	AACACCAGCATCTGATTGATCACTTTGAAATAGGTCATCAGTATGAGACG	10	62840378	R			NA	NA	TMEM26	NM_178505	Body					NA	10:62840106-62840383			NA
cg00077877	18644492	18644492	18644492	ATACAAATAAATACTCAAAAATCCTTCTAACATTCTATTTCTAACTCTAC	0.0089284	NA		II			ATTGAATCTCTGTGCAAGTAAGTGCTCAGGAATCCTTCTGGCATTCTATTTCTAGCTCTA[CG]TTGGAGAGCAATTTACAAGTCATTAACTTCTCTAGACCTAGGCTCCTAAACATAAAATTA	37	8	131414474	TGCAAGTAAGTGCTCAGGAATCCTTCTGGCATTCTATTTCTAGCTCTACG	8	131483656	R			NA	TRUE	ASAP1	NM_018482	TSS1500					NA				NA
cg00078318	21705443	21705443	21705443	AACTCACTACAAAATCACCACRACTCTTTCACCTACTAAAATAATTAACC	0.000904214	NA		II			TGGCTGATTGAAACTCACTGCAAAATCACCACGACTCTTTCACCTACTGAGATGATTGAC[CG]AGGTTTGGCCTTCCATTTTTACTGAGATTTGGCGAGACCGAATGGAAGCGTCCGCACAGT	37	2	5837429	CGGTCAATCATCTCAGTAGGTGAAAGAGTCGTGGTGATTTTGCAGTGAGT	2	5754880	R			NA	NA	SOX11	NM_003108;NM_003108	3'UTR;1stExon	chr2:5836068-5837643	Island			NA	2:5753781-5755127			TRUE
cg00078456	60603485	60603485	60603485	CACTTAAATTCCRAAAAAAATACCCTTACCTTATATTTTAAACATAAAAC	0.000214218	NA		II			CCTGCCTGTCCCACTTGGGTTCCGGAAGAGGTGCCCTTGCCTTGTATTTTAGACATGGGG[CG]CCGGCTGCTGGGGCTGCCAGGTGCCAGGAGACGCCTCCCTCGGGCCTGCCCCGGCGCCCG	37	1	1564422	ACTTGGGTTCCGGAAGAGGTGCCCTTGCCTTGTATTTTAGACATGGGGCG	1	1554285	R			NA	NA	MIB2	NM_001170687;NM_001170688;NM_080875;NM_001170689;NM_001170686;NR_033183	Body;Body;Body;Body;Body;Body	chr1:1564421-1570006	Island			NA				NA
cg00078968	47744504	47744504	47744504	AATTAAACCCACAATAACCRACRATATTTTATATAAATTTCCCCCTAATC	0.000561887	NA		II			GGCCTGGCGCGCGGCGCATACTTCCAGGTTGCTATGACTGGCCTGCGCTCGCCTAATCAC[CG]ACTAGGGGGAAATTCATATAAAATATCGCCGGCCATTGTGGGCCTAACTCGGCGTGACAG	37	1	228225659	GTTAGGCCCACAATGGCCGGCGATATTTTATATGAATTTCCCCCTAGTCG	1	226292282	F			NA	NA	WNT3A	NM_033131	Body	chr1:228225442-228225753	Island		DMR	NA	1:226292066-226292625	1:228225380-228225713	Unclassified	NA
cg00079023	61647371	61647371	61647371	AAACACCCTACTCAAAACTAAACCCAACCTAAATTACTAACCAACTCTAC	0.00452122	NA		II			TCCTTCCAGAAAGGAAGAAGAGTGGGCTAGGGTCTGAATGCTCACAGGGCCTGGTTCATC[CG]CAGAGCTGGCCAGCAACTCAGGCTGGGCTCAGCCCTGAGCAGGGTGCCCCCCTTCCCCAA	37	5	139492535	CGCAGAGCTGGCCAGCAACTCAGGCTGGGCTCAGCCCTGAGCAGGGTGCC	5	139472719	F			NA	NA	PURA	NM_005859	TSS1500	chr5:139492723-139492966	N_Shore			NA				NA
cg00079219	28810417	28810417	28810417	ATTTTCTCTCCAATTCTTAAATCCTACTCCRCTTCRCAATAAAATAAAAC	4.06e-05	NA		II			GTCTGTAACTCTGGGCTCCCTCTCTCCACTCCCCACTCCCCTACTGCAGGCTTCTAAATC[CG]TTCCATTCCACTGCGAAGCGGAGCAGGACCTAAGAATTGGAGAGAAAATTAAACGTCATA	37	12	54360131	TTTTCTCTCCAATTCTTAGGTCCTGCTCCGCTTCGCAGTGGAATGGAACG	12	52646398	F			NA	NA	HOTAIR	NR_003716	Body	chr12:54360374-54360660	N_Shore			NA	12:52645943-52646399			NA
cg00079551	51712458	51712458	51712458	ATTTCCTCTAACATCCCAAAATATACCTATTAAATAACTAATATATTTAC	4.04e-08	NA		II			TGAGTACCCCAGTTTCCTCTGACATCCCAGAGTGTGCCTGTTAGGTAACTGGTATGTTTA[CG]TGGTCCCAGTGCAAGTAAATGTGGGTGTGTGTGAGTGTGCCAGGCAATGGGATGGCATCC	37	2	40001222	TTTCCTCTGACATCCCAGAGTGTGCCTGTTAGGTAACTGGTATGTTTACG	2	39854726	R			NA	NA	THUMPD2	NR_028102;NM_025264	Body;Body					TRUE				NA
cg00079598	66630508	66630508	66630508	AACAACAACAAAAAACATCACCATCATCTCCCTAATATAAATTAATCATC	5.11e-06	NA		II			GTGTATAAGATATCCAGAAAGGACAAATTACTGAGGAAGAAGTACATTGGAGTTTGCAGG[CG]ATGATCAATCCATATCAGGGAGATGATGGTGATGTTTCCTGTTGCTGTTAATGTGTAAGT	37	11	123676903	ACAGCAACAGGAAACATCACCATCATCTCCCTGATATGGATTGATCATCG	11	123182113	F			NA	NA	OR6M1	NM_001005325	1stExon					NA				NA
cg00080081	17644455	17644455	17644455	ATAAATTATAAAACAACATAAACATTATAACCTCATTTTAACAAACRTAC	0.00740597	NA		II			ATACATATACAATGTGTGTATGGATACATGTACATACATATTACACTTATGTGTATGTTA[CG]CACGTTTGTTAAAATGAGGTCATAATGTTCATGCTGTTTCATAACCCACTTTCTTTCAAT	37	17	33701776	CGCACGTTTGTTAAAATGAGGTCATAATGTTCATGCTGTTTCATAACCCA	17	30725889	F			NA	NA	SLFN11	NM_001104587;NM_152270;NM_001104588;NM_001104590;NM_001104589	TSS1500;TSS1500;TSS1500;TSS1500;TSS1500	chr17:33700487-33700760	S_Shore			NA				NA
cg00080125	61679383	61679383	61679383	CCTCCCATTAAAACTTAACCCAAAACATTAATAACTTTTAATCCAAAAAC	0.000422884	NA		II			CGTTATTCCAGCGGGAGGTGGTGGGGACTGGGGAGGGCCCAGGGGTCAGCCTGAGAATCT[CG]CCCTTGGATTAAAAGCCACCAATGCTCTGGGTCAAGTCTCAATGGGAGGCTGGGGATGTA	37	17	59490613	CGCCCTTGGATTAAAAGCCACCAATGCTCTGGGTCAAGTCTCAATGGGAG	17	56845395	F			NA	NA	C17orf82	NM_203425;NM_203425	3'UTR;1stExon	chr17:59488115-59490485	S_Shore			NA				NA
cg00081324	52807416	52807416	52807416	CAATATCTATCCCTACTCAAACCTAACTTAAACCCAAACCTAACRAAAAC	0.00011672	NA		II			GGGAGTAGAGGGTAGGGAGGTTGGGGAGTAGGGGCAGAAAAGCCCAGGGAAGGGAGAGCT[CG]TTTCCGTCAGGCCTGGGCTTAAGTCAGGCCTGAGTAGGGACAGACACTGAGATTGAGGCC	37	17	48201233	AGTGTCTGTCCCTACTCAGGCCTGACTTAAGCCCAGGCCTGACGGAAACG	17	45556232	F			NA	NA	SAMD14	NM_174920	Body					TRUE				TRUE
cg00081602	59616426	59616426	59616426	CAATTAAATTTCTAAAAAAAAATCCATCTCTATAAACCCACAACRTCCCC	0.0242386	NA		II			TTCCCAGAGACCAGTTAGATTTCTAAGAAAGAATCCATCTCTATAGGCCCACAGCGTCCC[CG]CATTGGTTGGCTGGGTGGGCCGAGGAACAGTGGCAACATCTGTGTTTGTGCGGCTTCTCC	37	5	72922957	CGGGGACGCTGTGGGCCTATAGAGATGGATTCTTTCTTAGAAATCTAACT	5	72958713	R			NA	NA	RGNEF	NM_001080479	5'UTR	chr5:72921593-72922527	S_Shore		CDMR	NA				NA
cg00081799	25621453	21708478	25621453	TAAAATCAATACACCAAAAACTATTAAATTTTTAACCAATAAAAAAAACA	7.83e-10	21708478	TAAAATCGATACGCCAAAAACTATTAAATTTTTAACCAATAAAAAAAACG	I	A	Red	CGCTGAAAGCACCCTGTCCCTGCAGCGAGGGGATGGGAGCCAGGGGAGTCAGAAGCTACC[CG]TCCCCTCCACTGGCCAAAAACCCAACAGCTCTTGGCGCATCGATCCTAAGCGACAAGGCA	37	1	6390793	TAGGATCGATGCGCCAAGAGCTGTTGGGTTTTTGGCCAGTGGAGGGGACG	1	6313380	F			NA	NA	ACOT7	NM_181864;NM_181865;NM_007274;NM_181866	Body;Body;Body;Body					NA	1:6313380-6313433	1:6390329-6392291	Unclassified	TRUE
cg00081852	71758408	64616335	71758408	TACAAAATATAATCTCATAATACACTACAATCCAAAAAACACAATATTCA	4.05e-07	64616335	TACGAAATATAATCTCGTAATACGCTACAATCCGAAAAACGCAATATTCG	I	A	Red	CTCCGAGCCAGGTGCGGGATATAATCTCGTGGTGCGCTGCAGTCCGAAAAGCGCAATATT[CG]GGTGGGAGTGACCCGATTTTCCAGGTGCGTCCGTCACCCCTTTCTTTGACTCGGAAAGGG	37	6	22180818	TGCGGGATATAATCTCGTGGTGCGCTGCAGTCCGAAAAGCGCAATATTCG	6	22288797	R			NA	NA	FLJ22536	NR_015410	Body					NA	6:22288714-22288980			NA
cg00082384	30711404	24642453	30711404	CAACAAAAAACTAAATATTATCTAAACAACACCCCCTTCAAACAAACCCA	0.00170395	24642453	CGACGAAAAACTAAATATTATCTAAACAACGCCCCCTTCAAACAAACCCG	I	A	Red	TGCCTGTTGCTTCCAGCCTGATTCCCGAGAAGGGAGCCTGCTTGCGAAGGAACTGGCACT[CG]GGCCTGCCTGAAGGGGGCGCTGTCCAGACAACACCCAGCCTCCCGTCGTGGCAGGCGCTG	37	3	52516316	CGGGCCTGCCTGAAGGGGGCGCTGTCCAGACAACACCCAGCCTCCCGTCG	3	52491356	F			NA	NA	NISCH	NM_007184	Body					NA	3:52491321-52491455	3:52515883-52517574	Gene_Associated	TRUE
cg00082664	23671326	23671326	23671326	ACRACATTAAAAAACACACCRACAAACTACTAAACRATAACTAAAAATTC	0.00439699	NA		II			CCTGTGATGGAGCCCGGGACCTGCCCGCCCGAGGCCGCCTCGGCGAACTTCGTTTTCCCT[CG]AATCTCCAGCCACCGTTCAGCAGCCTGTCGGTGTGCTCCCCAATGCCGTAAAAAAATCAG	37	4	154710796	CGGCATTGGGGAGCACACCGACAGGCTGCTGAACGGTGGCTGGAGATTCG	4	154930246	F			NA	NA	SFRP2	NM_003013	TSS1500	chr4:154709512-154710827	Island			NA	4:154928723-154930262	4:154709210-154711062	Unclassified_Cell_type_specific	NA
cg00082939	53799304	53799304	53799304	CTAAACCTTACTCCCAATCAAATAAAACRAACCTAAATACAAAAACCTCC	0.0138069	NA		II			CTCCCCACCCCTGTCCTGCCCCGCCTCGCGGTCCCTGGGAGCGGGGAGAGAAAGCGCGCG[CG]GAGGCCTCTGCACCCAGGTCCGCCCCACCTGACTGGGAGCAAGGCCCAGATTCGCGGGGC	37	10	77165293	TGGGCCTTGCTCCCAGTCAGGTGGGGCGGACCTGGGTGCAGAGGCCTCCG	10	76835299	F			NA	NA	C10orf41	NR_024421;NR_024422	Body;Body	chr10:77155128-77169600	Island			NA	10:76835144-76835519	10:77165139-77165377	Unclassified_Cell_type_specific	NA
cg00083072	24726476	24726476	24726476	AAAAATATCCACACTAAATTCCTAAAACTACTAATAACRACCCRAAAAAC	1.79e-07	NA		II			GTCAGGGTGCCGGGGACGCGGGGAGGTGGGAGGGCCGGCAGTTGGCCACCGCGCAGTCTG[CG]CCTCCCGGGTCGCCATCAGCAGTTTCAGGAACCCAGTGTGGATACCTTTCCTTCTGGAAA	37	11	65415190	CGCCTCCCGGGTCGCCATCAGCAGTTTCAGGAACCCAGTGTGGATACCTT	11	65171766	F			NA	NA	SIPA1	NM_153253;NM_006747	Body;Body	chr11:65413778-65415203	Island			NA	11:65170355-65171774			NA
cg00083193	69631338	69631338	69631338	ATATACCCACTCCAAATCTCTATTACCCAATATCATCAATATTTAACCAC	0.0213579	NA		II			TGCCATGACCTTCACTATGAGAAAGCACAGGCTGTAAAAGGCCAGCCTGGCTCCCTGCTC[CG]TGGTTAAATATTGATGATATTGGGCAATAGAGACCTGGAGTGGGCACACTACATATCCCC	37	15	65337425	TGTGCCCACTCCAGGTCTCTATTGCCCAATATCATCAATATTTAACCACG	15	63124478	F			NA	NA	OSTBETA	NM_178859	TSS1500					NA				NA
cg00083206	67678444	67678444	67678444	CCCCTAACTAAAAATCATTTTAAATAACRAAAAATACTAACCRCAAACCC	0.00175055	NA		II			CAGCCCCAAGCCCCCTGGCTGGGGGTCATTTTAAGTGGCGGGAAATGCTGACCGCAGGCC[CG]CAGCCCAGGACGGGGTGGCAGGGTTGACCCAGGCCTTCCTGCCGCAGTCAGGGGTCAGGT	37	6	110721305	CGGGCCTGCGGTCAGCATTTCCCGCCACTTAAAATGACCCCCAGCCAGGG	6	110827998	R			NA	NA	DDO	NM_004032;NM_003649	Body;Body	chr6:110721059-110721630	Island			NA	6:110827422-110828273			NA
cg00083399	67804398	67804398	67804398	AAAACCTCCTACCAACACTCAAAAACACTATCTACTAACAACCTAATTCC	5.19e-06	NA		II			GGGTGTGTCCGGGGGCCTCCTGCCAACACTCAGGGGCACTGTCTGCTGGCAGCCTGGTTC[CG]GAAGGTGCTGGTGCTCACCCTGGAGGGTGACATCCTTCCCAGCCTGCTGCTCTCGGGCGC	37	16	86565980	CGGAACCAGGCTGCCAGCAGACAGTGCCCCTGAGTGTTGGCAGGAGGCCC	16	85123481	R			NA	NA	MTHFSD	NM_001159380;NR_027490;NM_001159377;NM_022764;NM_001159379;NM_001159378;NR_027489	Body;Body;Body;Body;Body;Body;Body	chr16:86565357-86565861	S_Shore			NA				NA
cg00083535	34679378	25810374	34679378	AACAACACCAACAATTTTACCAAAACCAAAACCAACAAATAACCACTACA	0.013751	25810374	AACAACACCAACGATTTTACCGAAACCAAAACCGACAAATAACCACTACG	I	A	Red	TCTGTGCCTTCAAGCAGCACCAACGGTTTTGCCGAGGCCAGAGCCGACAAGTAGCCACTG[CG]ACCGGGACTGTGAATCCGGGGGGGGCACAGTCTGCACACCCTCCCCACCCGCTCTAAACC	37	8	140871048	CGCAGTGGCTACTTGTCGGCTCTGGCCTCGGCAAAACCGTTGGTGCTGCT	8	140940230	R			NA	NA	TRAPPC9	NM_001160372;NM_031466	Body;Body					NA	8:140940230-140940632			NA
cg00083616	23707400	23707400	23707400	CTATACTCATCTACCTCCTTAACAATATAAAAAACAAACACTAAAACCCC	0.000188245	NA		II			GGAGCACCACGGCAGGAAGGACCGGGATCTTCATGGCGTCAAGTTTGGGGTGCTCTGAGG[CG]GGGCCTCAGTGCTTGCTCTTTATATTGCCAAGGAGGCAGATGAGCACAGAAATGGGGTCC	37	19	35981371	CGGGGCCTCAGTGCTTGCTCTTTATATTGCCAAGGAGGCAGATGAGCACA	19	40673211	F			NA	NA	KRTDAP	NM_207392	TSS200					NA				NA
cg00083652	12807507	34801331	12807507	AAAACAAAAATAAAAACTAAAACTACACCCAATACTTAAAAACCAACACA	0.00318864	34801331	AAAACAAAAATAAAAACTAAAACTACGCCCGATACTTAAAAACCAACGCG	I	A	Red	CCTCACTGCCTGGGGCCGCTCCGAGTGCAGGTCCCTCAGAGCCCAAGCCCACCCAGAACT[CG]CGCTGGCCCTCAAGCACCGGGCGCAGCCCCAGTTCCCACCCCTGCCTCTCCCTCCACACC	37	1	89739339	CGCGCTGGCCCTCAAGCACCGGGCGCAGCCCCAGTTCCCACCCCTGCCTC	1	89511927	F			NA	NA	GBP5	NM_052942;NM_001134486	TSS1500;TSS1500					NA				NA
cg00083659	49727462	49727462	49727462	ACACTCTCTATTTCCTAAAAAAATCCTAAAAAACTAAACTTACAAAAAAC	0.00325178	NA		II			AGCACTGGCCCATTCCTGTCTGGCTGTTGCTCAGCCTGGACAAAGAGTGGGTATAGTGAA[CG]CCTCCTGCAAGCCCAGCCTTTCAGGATTTCCCCAGGAAACAGAGAGTGCTGTGGTTAAAC	37	22	37404577	CGCCTCCTGCAAGCCCAGCCTTTCAGGATTTCCCCAGGAAACAGAGAGTG	22	35734523	F			NA	NA	C22orf33	NM_178552;NM_001163857	TSS1500;TSS1500					NA				NA
cg00083685	49710312	49710312	49710312	TCTTTAAAATACCCTAATACTTCTTCCCRAAATCTATAAAAAATAACRTC	0.0110072	NA		II			CCACCTCTACGGACGGAGGAGGAATCATGGTGTCCGGGAACCAGACAGAGAGTCCCACAG[CG]ACGTTACCTTCCACAGACTTCGGGAAGAAGCACCAGGGCACTTCAAAGATGAAGTTGGAG	37	21	43767586	CTTTGAAGTGCCCTGGTGCTTCTTCCCGAAGTCTGTGGAAGGTAACGTCG	21	42640655	F			NA	NA	TFF2	NM_005423	Body					NA	21:42640148-42641217	21:43767517-43767778	Unclassified_Cell_type_specific	NA
cg00083833	13749476	13749476	13749476	AAACRACATAAAACCCCTAAATCTAACTCCAAATACCAAAAATTACCCCC	0.000200886	NA		II			CCCCTCCTGGCCCCCGTGCCGTGGTCCTTCGCCTCCCACCGCGCCTCCTTCTTCCCTCCG[CG]GGGGTAACTTTTGGCACCTGGAGCCAGACTCAGGGGCTTCATGTCGTCCCCGTCCCAGGT	37	16	50583273	CGGGGGTAACTTTTGGCACCTGGAGCCAGACTCAGGGGCTTCATGTCGTC	16	49140774	F			NA	NA	NKD1	NM_033119	Body	chr16:50583175-50583465	Island			NA	16:49138894-49140927			NA
cg00083993	26762374	26762374	26762374	CTCCAAAACRACTATTATAATTTCCAATCATCCTTCATCTAACACRTAAC	0.0100624	NA		II			CCAAAAATAATCTGAAAGTCCCCAAGATATTTTGCCCACCAAAGTTCTGCCACAAGCCCC[CG]CCACGTGTCAGATGAAGGATGATTGGAAATTACAACAGCCGTTCTGGAGGGCAATTTAGC	37	5	146133678	TCCAGAACGGCTGTTGTAATTTCCAATCATCCTTCATCTGACACGTGGCG	5	146113871	F			NA	NA	PPP2R2B	NM_181674;NM_001127381;NM_181677;NM_181676;NM_181675;NM_004576;NM_181678	Body;Body;Body;Body;Body;Body;Body					TRUE				NA
cg00084643	17744419	17744419	17744419	TCCTAAAAACAATAACCCRCRAATACCTAAAAAAAATTATACCTTAACTC	0.0105073	NA		II			TTTCAAACACCATGCTGAGAACTCAGTCCTTGTTTTGGGGAGGGATGCACTTGGAAGATT[CG]AGCTAAGGTACAATCCTCCCTAGGTATCCGCGGGTCATTGTTTTCAGGACCCCCACAGAT	37	5	125936116	CGAGCTAAGGTACAATCCTCCCTAGGTATCCGCGGGTCATTGTTTTCAGG	5	125964015	F			NA	NA	PHAX	NM_032177	TSS1500	chr5:125936522-125937100	N_Shore			NA		5:125936047-125937986	Promoter_Associated	NA
cg00085199	36733333	36733333	36733333	TCTATCTCTAAAATATATTTAAAAACAACTACTTCTTACCTTCTTTTCAC	0.000679414	NA		II			TGGAACCCAGTTAGGAAATTATTGCAATAATCCAAGTGAGTGTGAATGGTGACCTGAATC[CG]TGAAAAGAAGGTAAGAAGTAGCTGCTTCCAAATACATTTTAGAGATAGAGAAACCAGAAT	37	8	141106596	CTATCTCTAAAATGTATTTGGAAGCAGCTACTTCTTACCTTCTTTTCACG	8	141175778	F			NA	NA	TRAPPC9	NM_001160372;NM_031466	Body;Body	chr8:141107837-141110984	N_Shore			NA				NA
cg00085430	51690448	51690448	51690448	CTTTAAACTTTCTCAAACTAAAATAATTTTTCCCATCCCATTTATCAAAC	2e-06	NA		II			TACTCCCTCACCTTTAGGCTTTCTCAGGCTGAAATAGTTTTTCCCATCCCATTTATCAGA[CG]AGCTAAGCTTCAGGTCTCACCTTAGATGTCACCTCTTCTGGGAAGTCTTTCCCAACTCAT	37	17	3031874	TTTAGGCTTTCTCAGGCTGAAATAGTTTTTCCCATCCCATTTATCAGACG	17	2978624	R			NA	NA	OR1G1	NM_003555	TSS1500					NA				NA
cg00085438	52701346	52701346	52701346	TACATAAAATAAATCATAACAAATAATTTTTCTAACCTTAACATTACCAC	0.00139074	NA		II			ATCTATCTATGTTTATTTAGATGACTGGATAAAAGAGTCATGATTCCTCCTAGTCTATCA[CG]TGGTAATGCCAAGGTCAGAAAAATCATTTGTTATGATCTATCTTATGTAAAAGCCTGTGG	37	3	152049980	CGTGGTAATGCCAAGGTCAGAAAAATCATTTGTTATGATCTATCTTATGT	3	153532670	F			NA	NA	MBNL1	NM_207295;NM_207293;NM_021038;NM_207292;NM_207296;NM_207297;NM_207294	Body;Body;Body;Body;Body;Body;Body					TRUE				NA
cg00086346	65707497	65707497	65707497	CTAATAATCRCTATCACTCCTCAACRAAAACAAAAACTAACTAAAAAATC	0.00566862	NA		II			ACTGGGGGCCCCTGATGGTCGCTGTCACTCCTCAGCGAAGGCAGAGACTGGCTAAGGGGT[CG]CCGGCTGCTGTGGCTCGGAGCCATGCCCTCCCGAGCGTGTGGGCACCGGGACGTGGTGGG	37	19	3908136	TGATGGTCGCTGTCACTCCTCAGCGAAGGCAGAGACTGGCTAAGGGGTCG	19	3859136	R			NA	NA	ATCAY	NM_033064	Body	chr19:3907689-3908398	Island			NA	19:3858708-3859304			NA
cg00086429	40603405	40603405	40603405	CTTTTAAACACTAATAATTTCTACCTATAATTCCAACCCTTTAAAAAACC	0.000803568	NA		II			GAGGCTGGGTCCTTTTAAGCACTGGTAATTTCTACCTGTAATTCCAGCCCTTTGGGAGGC[CG]AGGCAGGCAGGTCACCTGAGGTCAGGAGTTCGAGACCAGCCTGGTCAACATGGTGAAACC	37	2	206566025	CGGCCTCCCAAAGGGCTGGAATTACAGGTAGAAATTACCAGTGCTTAAAA	2	206274270	R			NA	NA	NRP2	NM_201279;NM_018534;NM_201264;NM_201267;NM_003872;NM_201266	Body;Body;Body;Body;Body;Body					TRUE				NA
cg00087425	47623357	47623357	47623357	AACCCCCAATAAATATAAAACTAAAAATATCTAAAACTCATTCTACCCTC	0.00158747	NA		II			ATTAGAGTCTCAACCCCCAATAAATATAGGACTGGAGATGTCTGAGGCTCATTCTGCCCT[CG]AGCCCACCGGGAACGAAAGAGAAGCTCTATCTCCCCTCCAGGAGCCCAGCTATGAACTCC	37	7	22766829	ACCCCCAATAAATATAGGACTGGAGATGTCTGAGGCTCATTCTGCCCTCG	7	22733354	R			NA	NA	IL6	NM_000600;NM_000600	5'UTR;1stExon					TRUE		7:22765249-22768812	Unclassified	TRUE
cg00087735	55769510	16746439	55769510	TTCATATCCTTCTAAAAACAAAACCACCACATTTAAAACTTCTCCTCCCA	0.0106207	16746439	TTCATATCCTTCTAAAAACGAAACCACCGCGTTTAAAACTTCTCCTCCCG	I	C	Grn	GCCTTGGCTACCTTCATGTCCTTCTAAGAACGGGGCCACCGCGTTTGGGGCTTCTCCTCC[CG]CAGAAGGGAACTCAAACCCTGTCTCTTTCCCCAGGTCTCGGAGGAGGCTTTGGATACGTG	37	1	8390233	CGGGAGGAGAAGCCCCAAACGCGGTGGCCCCGTTCTTAGAAGGACATGAA	1	8312820	R			NA	NA	SLC45A1	NM_001080397	Body	chr1:8390202-8390800	Island			NA	1:8312790-8313434			NA
cg00087898	51741334	51741334	51741334	CCTAACCATATTACRTTTAATTTTATAACCTAAAAATATATAAACCAAAC	0.00644472	NA		II			GAGCCACCGCACCTGGCCATATTACGTTTAATTTTATAACCTAAAAATGTGTGGGCCAGG[CG]CAGTGGCTCACGCCTGTAATCCCAACACTTTGGGAGGCCGAGGCGGGCAGATCATCTGAG	37	6	33253643	CGCCTGGCCCACACATTTTTAGGTTATAAAATTAAACGTAATATGGCCAG	6	33361621	R			NA	NA	WDR46	NM_005452;NM_001164267	Body;Body	chr6:33256539-33256973	N_Shelf			NA				NA
cg00088130	41633312	41633312	41633312	AATATTCATACCRTAAAAAAAACCTAAAAACTAAATATAAAACTCTTCCC	0.00211214	NA		II			ACCGACCCTGGTTGCGATACACCGTGAGACTCCGCTGTAGGGCCGCTGCAGAAGGGGCAC[CG]GGAAGAGCCCCATACCCAGCCTCTAGGCTCTTCTTACGGTATGAACATTTGTGGAGTAAA	37	3	137482267	CGGGAAGAGCCCCATACCCAGCCTCTAGGCTCTTCTTACGGTATGAACAT	3	138964957	F			NA	NA	SOX14	NM_004189	TSS1500	chr3:137482964-137484454	N_Shore			TRUE	3:138964564-138964958			NA
cg00088464	52718460	66677440	52718460	AACAACAAAACTAAAACTAACACAACAAACCTACAACAAAACCTCAAACA	0.0097999	66677440	AACAACGAAACTAAAACTAACACAACGAACCTACAACAAAACCTCGAACG	I	T	Red	AGAACCCCTGGCACTGTGACTGCAGCCTCACCTATCTGCGCCTCTGGCTGGAGGACCGCA[CG]CCCGAGGCCCTGCTGCAGGTCCGCTGTGCCAGCCCCAGCCTCGCTGCCCATGGCCCGCTG	37	3	128780893	CGCCCGAGGCCCTGCTGCAGGTCCGCTGTGCCAGCCCCAGCCTCGCTGCC	3	130263583	F			NA	NA	GP9	NM_000174	Body					NA	3:130263561-130263649			NA
cg00088507	30605509	30605509	30605509	ACTAAAAACACTACTACAAAAACTACTTAACRAATAACTTTAAACCACTC	0.0245062	NA		II			TAAACTCAGGGCCAACATAGACATGCTCCGTAGGTTGGATGACACGGAGCCACTTTCCCG[CG]AGTGGCTCAAAGCTACTCGCCAAGCAGCTCCTGCAGCAGTGCCCTCAGCCAGCCCCTCCA	37	15	29499242	CTGAGGGCACTGCTGCAGGAGCTGCTTGGCGAGTAGCTTTGAGCCACTCG	15	27286534	F			NA	NA	FAM189A1	NM_015307	Body					NA	15:27286469-27286554			NA
cg00088797	68725505	68725505	68725505	AATTAAATTCATAAAATAACTACTCCCCAAAAAAATCCTAAAAAAATACC	0.00159458	NA		II			GCTAAGAATAGTCTGCTTTAAATACCCATCGCTCCTTGGATCTGCTCTCAGGATGGTCAA[CG]GCACCTTTCCAGGACCCCCTTGGGGAGCAGCTACTCCATGAACCCAACTCATGCATCTCC	37	3	12976288	CGGCACCTTTCCAGGACCCCCTTGGGGAGCAGCTACTCCATGAACCCAAC	3	12951288	F			NA	NA	IQSEC1	NM_001134382;NM_014869	Body;Body	chr3:12976966-12978182	N_Shore			NA				TRUE
cg00088885	65694356	65694356	65694356	TTTTTCATAAAATCCCTAAATACTCTTCCTAAATACTAAATACCCATCCC	0.000318394	NA		II			TACTTTCTCCCTTTTTCATGGGATCCCTAAGTGCTCTTCCTGGATGCTGAATGCCCATCC[CG]TAAATGAAAAAGCTAGTTAATGATATTGTACATAAGTAATGTTTTAACTGTAGATTGTGT	37	4	88896634	CGGGATGGGCATTCAGCATCCAGGAAGAGCACTTAGGGATCCCATGAAAA	4	89115658	R			NA	NA	SPP1	NM_000582;NM_001040058;NM_001040060	TSS200;TSS200;TSS200					NA				NA
cg00088916	52749325	52749325	52749325	ACAATAATCAACAACTTTTTAACTCAACTAACTACAAACAAACACRACAC	2.35e-05	NA		II			ATGAGGACCCGGCTGAGAAAACTCTTCTGTGCCCCAGTGAACAAATGCTGTAGTCCAGTG[CG]TGTCGTGTTTGTCTGCAGTCAGCTGAGCTAAAAAGCTGTTGATCACTGTTGTTTTTTGAA	37	16	78011694	CAGTGATCAACAGCTTTTTAGCTCAGCTGACTGCAGACAAACACGACACG	16	76569195	F			NA	NA	VAT1L	NM_020927	3'UTR					NA				NA
cg00088989	12660398	12660398	12660398	AACAAAAATAACTTATATTTACTAAACACTCRATTTATATAAAACAACAC	0.00981	NA		II			AATGGAAAATGAATATTAACAGCACCTATTCATGGAGTTATGTAGGGTTGGGGGAAGACA[CG]TGCTGTTCCACACAAATCGAGTGCTCAGTAAATATAAGCCACTTCTGCCAACCAGTACAG	37	2	96968012	CGTGCTGTTCCACACAAATCGAGTGCTCAGTAAATATAAGCCACTTCTGC	2	96331739	F			NA	NA	SNRNP200	NM_014014	Body	chr2:96971125-96971556	N_Shelf			NA		2:96967841-96968038	Gene_Associated_Cell_type_specific	NA
cg00089091	62634326	62634326	62634326	AAAAAAAACRACCRAAACCAAAAAATAAAACCTCTTAATTCCCCATTAAC	2.71e-08	NA		II			CCACCGAGGGAGGGAGAGGCGGCCGGGACCAAGGAATGGGGCCTCTTGGTTCCCCATTAA[CG]CACGCTGAAGAAATCTGCTGCGCTCCTGACGGCCGCTCACCGGGTTCGAGCCCCGTCCTC	37	2	115919950	GGAGAGGCGGCCGGGACCAAGGAATGGGGCCTCTTGGTTCCCCATTAACG	2	115636420	R			NA	NA	DPP10	NM_001004360;NM_020868	Body;Body	chr2:115918737-115920765	Island		DMR	NA	2:115635166-115637235			NA
cg00089384	61742356	61742356	61742356	ATACTAAATCCTTCTCTTTAATCATTATTCAAACTAATTCCCAACATACC	7.53e-06	NA		II			AAGGCCTGATTGTGCTGAATCCTTCTCTTTGGTCATTATTCAGACTGGTTCCCAGCATGC[CG]CAGTCCAGAGGAAAAGGTCCAAGTTCTGTTTAAAAATCAGAGACTAAAGAGCTTACTCAG	37	15	51972699	CGGCATGCTGGGAACCAGTCTGAATAATGACCAAAGAGAAGGATTCAGCA	15	49759991	R			NA	NA	SCG3	NM_013243;NM_001165257	TSS1500;TSS1500	chr15:51973533-51973838	N_Shore			NA				NA
cg00089550	34683472	34683472	34683472	AATCTAAACCAAAAACAACRACCCAAAAAACRAAACCRACCAAAAAAAAC	0.0235459	NA		II			GTCCTCGTCCAAGTCTGGGCCAAGAGCAGCGGCCCAGGGGGCGGGGCCGGCCAGAGGGAG[CG]GGGAGAGGCTGAGGGGCGGTGCCAGCGCCGGACCCTGCCATTGGCTGGAGATTACAGGAG	37	11	57267181	GTCTGGGCCAAGAGCAGCGGCCCAGGGGGCGGGGCCGGCCAGAGGGAGCG	11	57023757	R			NA	NA	SLC43A1	NM_003627	Body	chr11:57267006-57267316	Island			TRUE	11:57023602-57024103			NA
cg00089719	53704439	53704439	53704439	TACTATTTATAACCACCAACAACTACAACTTACCCATACAATCCTCCAAC	0.00674472	NA		II			AGTCAAGGAAGTACTGTTTATGGCCACCAGCAGCTGCAACTTGCCCATACAGTCCTCCAG[CG]CCGCCTCCGGGTGGTCTCCCAGTCGCAAGTCCACGGGCCGCGAGACCCGCAGCATGCGGT	37	5	54527320	ACTGTTTATGGCCACCAGCAGCTGCAACTTGCCCATACAGTCCTCCAGCG	5	54563077	R			NA	NA	CCNO	NM_021147	Body	chr5:54527319-54527760	Island			TRUE	5:54562966-54563576	5:54526326-54528222	Unclassified_Cell_type_specific	NA
cg00089798	53669432	53669432	53669432	ATCCAAAAACATAAAAAACCRAAATCTAATACTATATAATCRTAAAAAAC	0.00010711	NA		II			CCGCCGTCACCATCCAGGGGCATAGGGAACCGAAGTCTGGTGCTGTGTGATCGTGGAGGG[CG]GCGTGTGAGTGTGGCCCTGAGCGTGCGAGTGTGCGCGCGCGTGTGTGGATGTGTTTCCTC	37	12	62585204	CGCCCTCCACGATCACACAGCACCAGACTTCGGTTCCCTATGCCCCTGGA	12	60871471	R			NA	NA	FAM19A2	NM_178539;NM_178539	5'UTR;1stExon	chr12:62584768-62586268	Island			TRUE	12:60870960-60871590	12:62584842-62585603	Unclassified	NA
cg00090135	44731346	44731346	44731346	CTCATATAACTACCAATCAACTTATAATTAATACATAACAATAATACACC	0.000114404	NA		II			AACAGCATAGAACAAGTTAACACAAAAACACTCCTTATTTTTTCCACTGTTTATCTCATG[CG]GTGCATTACTGCTATGCATTAATCATAAGCTGATTGGCAGTCACATGAGTATTGCATACT	37	5	7848160	CGGTGCATTACTGCTATGCATTAATCATAAGCTGATTGGCAGTCACATGA	5	7901160	F			NA	NA	C5orf49	NM_001089584	Body	chr5:7849945-7850439	N_Shore		CDMR	NA				NA
cg00090261	48772348	48772348	48772348	CRAACTATAATAAAAAAATAACRAACCTAAACAACRATCACCACAATAAC	6.97e-07	NA		II			CACCCGGAAGGGGCGCCCTGGAGACGCCTGTGTCCCTCGAGACTCCACTGGCAGCGAATT[CG]TTACTGTGGTGACCGCTGCTCAGGTCCGTTATTCCTCCACTACAGCCCGCCAGCAACGGC	37	8	101118548	CGTTACTGTGGTGACCGCTGCTCAGGTCCGTTATTCCTCCACTACAGCCC	8	101187724	F			NA	NA	RGS22	NM_015668	TSS1500	chr8:101117922-101118693	Island			TRUE	8:101187107-101187920			NA
cg00090282	60678362	60678362	60678362	AATAATCATATAAAACTCTCTAACRCCAATCCRATCCTTAAAAACAACCC	1.63e-05	NA		II			ACCCCCTCATGAATAATCATGTAAGACTCTCTAGCGCCAGTCCGATCCTTAGAAGCAGCC[CG]ACTGGAACTCTCTCTCTCAGAGTATAATGTCTATTCTGCACCTAACTTACAAAATATTCT	37	3	21761217	CGGGCTGCTTCTAAGGATCGGACTGGCGCTAGAGAGTCTTACATGATTAT	3	21736221	R			NA	NA	ZNF385D	NM_024697	Body					TRUE				NA
cg00090737	61615369	73701409	61615369	AAAATTCTCTCATCATCCCTAAAAATCTAAACTTCACCACTAACATCTCA	0.000212076	73701409	AAAATTCTCTCATCGTCCCTAAAAATCTAAACTTCACCGCTAACATCTCG	I	A	Red	CCAGGACAGCCCGAGACTTCACACCCCAGCCAGGGGCCAGCAGAGGCCCCTGCAGACCCT[CG]AGATGCTAGCGGTGAAGCCCAGACTCCCAGGGACGATGAGAGAATTCCAGAAGGAGCTAG	37	10	135000089	GGAATTCTCTCATCGTCCCTGGGAGTCTGGGCTTCACCGCTAGCATCTCG	10	134850079	F			NA	NA	KNDC1	NM_152643	Body	chr10:134999520-134999831	S_Shore			NA	10:134849552-134850249			TRUE
cg00090764	41763306	41763306	41763306	TCCAAACTACAAAAACTCCATCRCTATCACCAAACCCAAAAACTATAAAC	0.00805412	NA		II			AGTGGGCGGTGTCCAGGCTGCAGAGGCTCCATCGCTGTCACCAGGCCCAGAGGCTGTGGA[CG]GCTGCGAGTGGCCCGTGCGGCTTTTAGAAGCACAGACAGGAGATGGGGTGGACGAGGCGG	37	1	2259065	CCAGGCTGCAGAGGCTCCATCGCTGTCACCAGGCCCAGAGGCTGTGGACG	1	2248925	R			NA	NA	MORN1	NM_024848	Body	chr1:2259064-2259326	Island			NA				NA
cg00090865	40753387	13619429	40753387	ACAAAACCTCACTAAACAATCATAATAAACAAAAACCTAAACTAAAACCA	0.0293924	13619429	ACGAAACCTCACTAAACGATCGTAATAAACGAAAACCTAAACTAAAACCG	I	A	Red	GCGGTGGGAGGGGCGGGGCCTCACTGGGCGATCGTAGTGGACGAGAACCTAGACTGGAAC[CG]GTCCGAAGAAAAAAAGGCAGCCCTCATTGGGCTGTCGCCTGGAACAGGAGACCAGGCCGG	37	3	43663694	GCGGGGCCTCACTGGGCGATCGTAGTGGACGAGAACCTAGACTGGAACCG	3	43638698	R			NA	NA	ANO10	NM_018075	TSS200	chr3:43663661-43663906	Island			NA	3:43637890-43638910	3:43662652-43664336	Promoter_Associated	NA
cg00091178	32749383	32749383	32749383	AATATCAATATATCCATTATAAATATCTTTACCTCTTCAAAACTATCATC	0.00234714	NA		II			CACAGTTCAGACCATCACAGGCAGTGATCCCAGGGAAGCCATCTTTGACACCCTTTGCAC[CG]ATGACAGCTCTGAAGAGGCAAAGACACTCACAATGGACATATTGACATTGGCTCACACCT	37	3	195451909	ATGTCAATATGTCCATTGTGAGTGTCTTTGCCTCTTCAGAGCTGTCATCG	3	196937580	F			NA	NA	MUC20	NM_001098516;NM_152673	1stExon;Body	chr3:195452004-195452645	N_Shore			NA				NA
cg00091633	12743308	39716441	12743308	CAAAACAACAAAACACCAAAAAATAAACACAAAACCAAAAAAACCAACCA	2.96e-06	39716441	CAAAACAACGAAACACCGAAAAATAAACGCAAAACCGAAAAAACCGACCG	I	A	Red	GGGTCACGGCAGCAGGGCAGCGGGGCACCGGGAAGTGGGCGCAGGGCCGGGAAGACCGGC[CG]GCGTGGGGAAGGCTGCTGTGGGTTCTACAGTGCATTGTCCCGGGTGAGGTGGCGGCCGCC	37	3	120170383	CGGCCGGTCTTCCCGGCCCTGCGCCCACTTCCCGGTGCCCCGCTGCCCTG	3	121653073	R			NA	NA	FSTL1	NM_007085	TSS1500	chr3:120169202-120170519	Island			NA	3:121651810-121653132			TRUE
cg00091742	10644480	21603332	10644480	AAAACTCAAAAACCTTTACCAACAAACACAAATCCTCCACATACTAAACA	0.0273342	21603332	AAAACTCAAAAACCTTTACCGACGAACGCGAATCCTCCACATACTAAACG	I	C	Grn	AGAAAAGAAAGAGACACAGAGACAAAGTATAGAGAAAGAAAAGTGGGCCCAAGGGACCGG[CG]CTCAGCATGTGGAGGACCCGCGCCCGCCGGCAAAGGTCTCTGAGTTCCCTCAGTATTTAT	37	7	23796949	GGAACTCAGAGACCTTTGCCGGCGGGCGCGGGTCCTCCACATGCTGAGCG	7	23763474	F			NA	NA	STK31	NM_032944;NM_031414;NM_001122833	Body;Body;Body					NA	7:23763384-23763504			NA
cg00091960	74614420	74614420	74614420	TATACAACAAATCCAATTTCTTTTTCRTTCTCCTAATAAAAAAACTATAC	1.79e-08	NA		II			TCTCATTGCCCTGTACAGCAGGTCCAGTTTCTTTTTCGTTCTCCTGATAGAAGGACTGTA[CG]CCTAAATATTCAGCACATATCCCCAAATTGATGTTTTACCTAAATTGTTTCTTAATTGGC	37	7	126829514	GTACAGCAGGTCCAGTTTCTTTTTCGTTCTCCTGATAGAAGGACTGTACG	7	126616750	R			NA	NA	GRM8	NM_001127323;NR_028041;NM_000845	Body;Body;Body					TRUE				NA
cg00092551	68784342	68784342	68784342	AACATACAAAATTCCTCACAACTACTTAAACCAAACTCTATCCTTCCTTC	1.16e-06	NA		II			TTCCTCAGGAAAACATGCAGGGTTCCTCACAGCTGCTTGAGCCAGGCTCTGTCCTTCCTT[CG]CAGATTGCCCCGTGGCTGCCTGCCTCTTCACTCTCCTAAAGCTTTTTGGCTTTACCTTCC	37	7	127371565	ACATGCAGGGTTCCTCACAGCTGCTTGAGCCAGGCTCTGTCCTTCCTTCG	7	127158801	R			NA	NA	SND1	NM_014390	Body					TRUE				NA
cg00092711	61718467	61718467	61718467	CRCCCTACTATCCCTAAATTAATAATCCTATAATAAAAAATAAAACACAC	0.000521059	NA		II			CAGGGGCACCGCGCCCTGCTGTCCCTGGGTTGATAATCCTGTGGTGGGGGGTGAAGCACA[CG]TGTGGGACCTGGCAGGGCTCTGCCTCCCCTCCTGGAGCTCCCAGCCCCCGGGAACACACT	37	21	47850317	GCCCTGCTGTCCCTGGGTTGATAATCCTGTGGTGGGGGGTGAAGCACACG	21	46674745	R			NA	NA	PCNT	NM_006031	Body	chr21:47851448-47851683	N_Shore			NA				NA
cg00093058	24639317	24639317	24639317	AACCTCTACCCRTCCCTTAATCRACTATTTATCAAAACCCCTATAATACC	0.0232802	NA		II			GGCCTGAGCTCAGCCTCTGCCCGTCCCTTAATCGGCTGTTTGTCAAGGCCCCTGTGGTGC[CG]TGAAGCAATGGCCGCTCGGCCTGCCAGGGCGCCAGGACCCTGCGCTGTCCGCCGTGGCCG	37	16	717932	CGGCACCACAGGGGCCTTGACAAACAGCCGATTAAGGGACGGGCAGAGGC	16	657933	R			NA	NA	RHOT2	NM_138769	TSS200	chr16:717931-719064	Island			NA	16:657894-659021	16:717112-718821	Promoter_Associated	NA
cg00093354	71661427	71661427	71661427	AATTCACCCACATACACRTACATACTTACATACACAAACACTACACACAC	0.017714	NA		II			ATGCACACATGGGTTCACCCACATACACGTGCATGCTTACATGCACAAACACTGCACACA[CG]CACGTTGACACTTCAAGGGGTGGAGGGTGCTGGCTCTGGTCCCGGCTGACCCAGGCAGGG	37	17	15635464	GTTCACCCACATACACGTGCATGCTTACATGCACAAACACTGCACACACG	17	15576189	R			NA	NA	TBC1D26	NM_178571	TSS200					NA				NA
cg00093695	73605503	73605503	73605503	CTCTAAACTCCTAACCCTAACAATATACCTATCTTACCAACACTACCAAC	0.00107409	NA		II			CCCTTGTAGTGCAAATGGTTGGGGGTGGCAGGATGGACCAGTGTGGACTCCTGGGACTGA[CG]CTGGCAGTGCTGGCAAGACAGGTACACTGCTAGGGTCAGGAGCCCAGAGCCCAAGAAGCA	37	3	122629793	CGCTGGCAGTGCTGGCAAGACAGGTACACTGCTAGGGTCAGGAGCCCAGA	3	124112483	F			NA	NA	SEMA5B	NM_001031702	Body	chr3:122631722-122632854	N_Shore			NA				NA
cg00093851	28679407	28679407	28679407	CTAATCATATAATTTTCCTAAATCTTTTAATTATCCACAAAATAAAACCC	0.0202114	NA		II			GAGATAAAGTTAGAGAAAATGTCACATTATAAGTGGTTCTGCATTCCAAGTTAAAGCATT[CG]GGCTTTATTCTGTGGACAATTAAAAGATTTAGGAAAATCATATGATTAGATTAGGAAAAT	37	7	123195258	CGGGCTTTATTCTGTGGACAATTAAAAGATTTAGGAAAATCATATGATTA	7	122982494	F			NA	NA	NDUFA5	NM_005000	Body	chr7:123197660-123197925	N_Shelf			NA				NA
cg00094063	24765417	20788437	24765417	AATACTATAAATCCTATCTCCTAAATCTCTCTCCACTCATCCATCCAACA	0.000961522	20788437	AATACTATAAATCCTATCTCCTAAATCTCTCTCCACTCATCCATCCGACG	I	A	Red	AAAGGTGGAGGAGGGAAAACCGTAAAATCAAGTGAGAGGCTTGGAATAGGGTGGCTGCGT[CG]CCGGATGGATGAGTGGAGAGAGATTTAGGAGATAGGATTTACAGCATTAGATAACTGGAA	37	16	66913816	CGCCGGATGGATGAGTGGAGAGAGATTTAGGAGATAGGATTTACAGCATT	16	65471317	F			NA	NA	PDP2	NM_020786	TSS1500	chr16:66914167-66914782	N_Shore			NA		16:66913721-66915160	Promoter_Associated	NA
cg00094303	23740331	23740331	23740331	CATTTCCATTCCTTTCAATAAACCTTCAAAACTAAACATAAATTTATCAC	0.000116916	NA		II			AATCCCCACTTCATTTCCATTCCTTTCAGTAAGCCTTCAGGACTGGGCATGAGTTTATCA[CG]TGGGAGCTACGGGCTTTGGGGAAGCTCACTGACTGCTTTGAGCTCAGCTTGCTCATTTAT	37	16	65039041	ATTTCCATTCCTTTCAGTAAGCCTTCAGGACTGGGCATGAGTTTATCACG	16	63596542	R			NA	NA	CDH11	NM_001797	5'UTR					NA				NA
cg00095018	63696316	63696316	63696316	TCCAAAATAAAATTCRTTATCTTTCCCCCAAAATCTATTCTTCCTCTACC	0.00720826	NA		II			TGCAGTAGCTGAGTGAGGTGGCAGAGGTGGAGGAATGGGCAGGTTCCTGCTTGAAATACA[CG]GTAGAGGAAGAACAGATCTTGGGGGAAAGATAACGAACTCCATTTTGGACACTTTACTTT	37	6	36101338	CGGTAGAGGAAGAACAGATCTTGGGGGAAAGATAACGAACTCCATTTTGG	6	36209316	F			NA	NA	MAPK13	NM_002754	Body	chr6:36098039-36098621	S_Shelf			NA		6:36101310-36101392	Unclassified	NA
cg00095099	23663504	23663504	23663504	TATATCTCTACCATAATAAATAAAATATCATAAAAAATTTTTCTTTCCTC	3.97e-06	NA		II			TATTTGATTAATGTGTCTCTACCATAATAGATGGAATGTCATAAGAGATTTTTCTTTCCT[CG]CCATTGAGCATCCATTGCCTGTTACATAGTAGATCCTCAATAAATGTTTTGCAACTGAAT	37	16	20377894	GTGTCTCTACCATAATAGATGGAATGTCATAAGAGATTTTTCTTTCCTCG	16	20285395	R			TRUE	NA	PDILT	NM_174924	Body					NA				NA
cg00095772	67797394	67797394	67797394	ATACTACTATATAAATCTATAAATACTATTACCTCCTCTATACAACCCAC	0.00010199	NA		II			GCCTGCGTCAGGTACTGCTGTGTGAGTCTATAAATGCTGTTACCTCCTCTGTGCAGCCCA[CG]TCAGGTACTGCTGTGTGTTGCTATAAATGCTGTTAACTCTGCATTCACATTGTAGACGTG	37	2	1050773	CGTGGGCTGCACAGAGGAGGTAACAGCATTTATAGACTCACACAGCAGTA	2	1040773	R			NA	NA	SNTG2	NM_018968	Body	chr2:1052315-1052730	N_Shore			TRUE				NA
cg00095870	28693320	28693320	28693320	AACACTACCACRTATACTTCCCCAACACCCAAAAATACTAAATATAAATC	0.000565335	NA		II			AGGGCTGCGGAGGGGCTGGCTTCCCTGGGAGTGCTGGGCAGCCCGAGGCAGTGAAACGAG[CG]ACCCACATTCAGCACCTCTGGGTGCTGGGGAAGCACACGTGGCAGTGCCAGGCCTTGGGC	37	19	1119388	GCACTGCCACGTGTGCTTCCCCAGCACCCAGAGGTGCTGAATGTGGGTCG	19	1070388	F			NA	NA	SBNO2	NM_001100122;NM_014963	Body;Body	chr19:1118907-1120215	Island			NA	19:1069926-1071339			NA
cg00095976	38767389	38767389	38767389	CRAATATAATAAAAACAACATCTAAAATTCTCCRTTTAAATTTCTAATCC	9.88e-05	NA		II			GCCAATTATGGCGAATGTAGTAGGAGCAACATCTAGGATTCTCCGTTTGGGTTTCTAATC[CG]GGGCCGGCACCTGTCTCGGCGTCCTGCCGCTGTCCCAGGCCGGTGGTGCTGGATTCCGCG	37	6	118228060	GAATGTAGTAGGAGCAACATCTAGGATTCTCCGTTTGGGTTTCTAATCCG	6	118334753	R			NA	NA	SLC35F1	NM_001029858	TSS1500	chr6:118228042-118229811	Island		CDMR	NA	6:118334736-118336530	6:118227966-118228387	Unclassified_Cell_type_specific	TRUE
cg00096104	71761475	55761321	71761475	AACAACTAAAATTTAAACAAACAAACACCACCCCCTCCAAAACCAACCCA	0.00232888	55761321	AACAACTAAAATTTAAACAAACGAACACCACCCCCTCCAAAACCAACCCG	I	C	Grn	GATCAGTGACTTTCCCAGACCCCGCGGGCGAGCCCGCGCTTGGGACCCGGCAGCTCTGCG[CG]GGCTGGTTTTGGAGGGGGTGGTGTTCGTTTGTTTAAATTCCAGTTGTTATTTGGCAGCAT	37	13	100547897	CGGGCTGGTTTTGGAGGGGGTGGTGTTCGTTTGTTTAAATTCCAGTTGTT	13	99345898	F			NA	NA	CLYBL	NM_206808	3'UTR	chr13:100547633-100548911	Island			NA	13:99345635-99345926	13:100546896-100548718	Unclassified_Cell_type_specific	NA
cg00096106	12634356	12634356	12634356	ATAAAAATCAATAACCTATATAAAAATTACCAACATAACAACAAAAATAC	1.1e-05	NA		II			TGCAAAACCTACTGTACATCATGATAAAGAAAGAAGAGAGGTTCATAAATCTATTTGGAA[CG]TATTTTTGTTGTCATGTTGGTAATTTCTACACAGGTTACTGATTTCCATAGTTGCATAGC	37	5	100176809	TGGAAATCAGTAACCTGTGTAGAAATTACCAACATGACAACAAAAATACG	5	100204708	F			NA	NA	ST8SIA4	NM_005668	Body					TRUE				NA
cg00096845	51696432	51696432	51696432	AACATAACCRCAATCACAAAATAAAATATAAATATCCTCTAAATAAAACC	0.00362566	NA		II			GACAGCAAGGACAGGTGCTGGCCGCGATCTTTTGGAGCGGGGCTTCCTGCCTGCGCTGTC[CG]GCCCCACCTAGAGGATATTTACATTTCATCTTGTGACTGCGGTTATGTTTATTTATAAAT	37	11	3400610	CGGCCCCACCTAGAGGATATTTACATTTCATCTTGTGACTGCGGTTATGT	11	3357186	F			NA	NA	ZNF195	NM_001130519;NM_001130520;NM_007152	TSS200;TSS200;TSS200	chr11:3400155-3400419	S_Shore			NA		11:3399546-3401097	Unclassified	NA
cg00097038	33697483	33697483	33697483	CCTCCCCTTTTTAAATCACACTAATAAATATTATAATCACAACACTAAAC	8.84e-05	NA		II			CAAAATACTTATCTGTGTTTAGATTTCCCAAAATTCATTTCTTCATAATAATACTGTCAG[CG]TTCAGTGTTGTGATCATAACATTCACTAGTGTGACTTAAAAAGGGGAGGCACCATGTGTT	37	1	197382771	CTCCCCTTTTTAAGTCACACTAGTGAATGTTATGATCACAACACTGAACG	1	195649394	F			NA	NA	CRB1	NM_201253	Body					NA				NA
cg00097357	67678507	67678507	67678507	TTTAACTCCTAATACAACAAATAACCCTCTCAAACRACTCTTAAAACCAC	5.03e-05	NA		II			AAGCAGTGTTTTTTGACTCCTAGTGCAACAAGTGACCCTCTCAAGCGGCTCTTGAAACCA[CG]CAGCCCGCAACTCGGGGATCCACCTCGCGTGCGCCCGAGGAGCACAGCAGGCTGGACACA	37	12	33591336	TTGACTCCTAGTGCAACAAGTGACCCTCTCAAGCGGCTCTTGAAACCACG	12	33482603	R			NA	NA	SYT10	NM_198992	Body	chr12:33591763-33593050	N_Shore		RDMR	NA	12:33482531-33482882			NA
cg00097619	65741371	65741371	65741371	CACCATCTTATCRCTAATAACTCAAAAAAAACACATAAAAAAATAATCCC	0.00547058	NA		II			ATCCGCCCGCCTCAGCCTCCCAAACTGTTGGGATTACAGGCGTAAGCCACCGCGCCCGGC[CG]GGACCATTCTTCCATGTGCTTCTCCTGAGCTATCAGCGACAAGATGGTGTCAGAGGAAGG	37	3	49942096	ACCATCTTGTCGCTGATAGCTCAGGAGAAGCACATGGAAGAATGGTCCCG	3	49917100	F			NA	NA	MST1R	NM_002447	TSS1500	chr3:49940099-49940431	S_Shore			NA				NA
cg00097790	15626410	15626410	15626410	TCCACTCTTAAACTCTACAATAACTTAAAAAATCAAATCTATAATCCCAC	0.00387763	NA		II			TGCTGTGTTTCTCCACTCTTGGGCTCTGCAGTGACTTGAGGGGTCAAGTCTATGATCCCA[CG]GGAGGCTGGGCTAATGAGGGGACCAGAGACCTCAGTGCTGTGCAGGGAGTCCTGAACCAC	37	1	148930220	CCACTCTTGGGCTCTGCAGTGACTTGAGGGGTCAAGTCTATGATCCCACG	1	147196844	R			NA	NA	LOC645166	NR_027354;NR_027356;NR_027355	TSS200;Body;Body					NA				NA
cg00097800	65686380	65686380	65686380	ACAACCAAATCTTACRTAACTCCAAACRATAACATCTAAAATCAAACACC	0.0226416	NA		II			GGGTAAAAACTGCAGCCAGATCTTGCGTGACTCCAGGCGGTGGCATCTGAAGTCAGGCAC[CG]TGGCGCTGCACCGCACGTGGACGGGTGCTGGCGATTACATGCGGGGAAGAAGAGCGAGCC	37	2	46593258	CGGTGCCTGACTTCAGATGCCACCGCCTGGAGTCACGCAAGATCTGGCTG	2	46446762	R			NA	NA	EPAS1	NM_001430	Body					TRUE	2:46446727-46446796	2:46592871-46594020	Unclassified_Cell_type_specific	NA
cg00098297	42666362	42666362	42666362	TATCATCTAACCATTCTATCATCCTAAAAACCTCAAATCTAAATAAATTC	0.0174894	NA		II			GCACCCCACTTTATCATCTGGCCATTCTGTCATCCTGGGGGCCTCAAGTCTGAGTAGGTT[CG]GCCTGGCCTGGCTTTGATGGAAGCAGTCATTTGTTGGAGTGGCACTAGTCATAGGAGAGA	37	12	117401813	ATCATCTGGCCATTCTGTCATCCTGGGGGCCTCAAGTCTGAGTAGGTTCG	12	115886196	R			NA	NA	FBXW8	NM_153348;NM_012174	Body;Body					TRUE				NA
cg00099017	72658375	72658375	72658375	AAACCTCCTATAAATAAAATTTCTTTTTTCCATCACTCACTAAAACCRAC	0.0109491	NA		II			ACCTTTATTGTGAGCCTCCTGTAAGTGGGGTTTCTTTTTTCCATCACTCACTGAAACCGG[CG]CATGGTATCTTCTCTGGAAAACTAGGACTTTAGGCAACATCAATCCTGCAACAGGGAAGC	37	16	7258022	CGCCGGTTTCAGTGAGTGATGGAAAAAAGAAACCCCACTTACAGGAGGCT	16	7198023	R			NA	NA	A2BP1	NM_001142334;NM_001142333;NM_018723	Body;Body;Body					TRUE				NA
cg00099240	64656395	64656395	64656395	AAAATCAACTAACTTTCCCAAAAATAAATTCCAAAAACACTACATTCTTC	1.27e-05	NA		II			GGAGCCCAGTTAGCTAATAATTCTGGGTCCCAGGAGTGTCTAGACGCCCCTCGGGGAGTG[CG]AAGAATGCAGTGTCCTTGGAATCCACCTTTGGGAAAGTCAGCTGACCTCCCGGACCTCAG	37	22	33454632	AGGTCAGCTGACTTTCCCAAAGGTGGATTCCAAGGACACTGCATTCTTCG	22	31784632	F			NA	NA	SYN3	NM_001135774	TSS1500	chr22:33453892-33454505	S_Shore			NA				TRUE
cg00099393	29656469	29656469	29656469	AACRACAATATCTATATCTCACCTTTAACCATCTTATTAAAAACCATATC	0.00637181	NA		II			AGCCGCAACAAAGCGGCAGTGTCTGTGTCTCACCTTTGGCCATCTTGTTGAGAACCATGT[CG]ATCAGGACGTAGGTGCCGCTCCGGCCTGCACCGTCACTGCCAACAGAAGGAGAGAAATGA	37	7	157361621	CGACATGGTTCTCAACAAGATGGCCAAAGGTGAGACACAGACACTGCCGC	7	157054382	R			NA	NA	PTPRN2	NM_002847;NM_130842;NM_130843	Body;Body;Body	chr7:157361512-157361805	Island			NA	7:157053965-157054566	7:157360891-157362762	Unclassified_Cell_type_specific	TRUE
cg00099766	25748395	25748395	25748395	RCTTTCTATTAACCTTTCCAAATAACCTTACAATAAAAAAACTTTTACTC	1.69e-05	NA		II			GTTTAACAGCCGCTTTCTATTGACCTTTCCAAGTGACCTTACAGTAAAGGAACTTTTGCT[CG]CTTCTGAGGGAAACTAAAAAAAGTTTAACCTCTCTGGAATACTAAAAGGCTCTCAACTTC	37	6	90120705	CTTTCTATTGACCTTTCCAAGTGACCTTACAGTAAAGGAACTTTTGCTCG	6	90177424	R			NA	NA	RRAGD	NM_021244	Body	chr6:90120874-90122370	N_Shore			NA				NA
cg00100114	40612494	40612494	40612494	CAAAAAAAAACCCAAAAAAACTTTATTAACACCTATAATCTCCAAAATTC	0.0233359	NA		II			GGAGTTGAGCTCAGAGAAAGGCCCAGGGAAGCTTTATTAGCACCTGTAGTCTCCAGAGTT[CG]GGGATGCTCAGATCTTAGGGGTGCCACCAGAGGTCTCAGGAGGCACTGGTATGAGTGTCC	37	7	101932902	AGAGAAAGGCCCAGGGAAGCTTTATTAGCACCTGTAGTCTCCAGAGTTCG	7	101719622	R			NA	NA	SH2B2	NM_020979	Body	chr7:101929503-101931089	S_Shore			NA		7:101932757-101932954	Unclassified_Cell_type_specific	NA
cg00100121	48731417	38693440	48731417	AAAACACAAAAACACACTATTACCATAACAATATAATCCTAACTACCACA	1.42e-06	38693440	AAAACGCAAAAACACGCTATTACCATAACAATATAATCCTAACTACCGCG	I	A	Red	CCTCTCCTCCTCTTTCTAAGCTCTTCACATTGAGGCAAAGGAGACCCCGGCACCTGCCTC[CG]CGGCAGCCAGGACCACACTGCCATGGCAACAGCGTGCCTCTGCGTCCTCCATCCGGGCCT	37	1	169396635	CGCGGCAGCCAGGACCACACTGCCATGGCAACAGCGTGCCTCTGCGTCCT	1	167663259	F			NA	NA	C1orf114	NM_021179;NM_021179	1stExon;5'UTR	chr1:169396621-169396869	Island		DMR	TRUE	1:167663071-167663470			NA
cg00100538	52638334	52638334	52638334	AAAATCACAAAAATTAAATATACACAAACTAACCTACTCATATACRCAAC	0.0220845	NA		II			CAGGGTGGGGAAGGATCACAGGAATTGAGTGTGCACAGGCTGGCCTGCTCATGTGCGCAG[CG]TACAGCCTGGGTGGACACTAAGCCCTTTTAGATGTCTGTCTGTATGACAGGGTGGGGCTG	37	4	184067792	CGCTGCGCACATGAGCAGGCCAGCCTGTGCACACTCAATTCCTGTGATCC	4	184304786	R			NA	NA	WWC2	NM_024949	Body					TRUE				NA
cg00101104	64624457	64624457	64624457	TTACTCTTCTCCAAAAATCTTACCAATTCTCCTACTTAAATATAAACTAC	7.49e-06	NA		II			CTCATAATCCATTGCTCTTCTCCAGAAATCTTACCAATTCTCCTGCTTAAATATAAGCTA[CG]TGTAGTAGGCATTGTTTTTTCTTAGCAGATACGAAACTCAGGAAGATTGTCCTATGATAA	37	19	54219607	TGCTCTTCTCCAGAAATCTTACCAATTCTCCTGCTTAAATATAAGCTACG	19	58911419	R			NA	NA	MIR521-2	NR_030203	TSS1500					NA				NA
cg00101457	43639414	43639414	43639414	CATTTTAAAAATTCCTATCACACRAAAATCAAACRCAAAAAATCACTACC	0.000797355	NA		II			ACCCGCAGAGAGCTGCATTCCTTAGGAGAACAGGAGCACGGCAGCGGAACCACAGTCAGA[CG]GCAGTGATCTCCTGCGCTTGATCCCCGTGTGACAGGAACTCTCAAAATGAAATCCAGCTG	37	10	11246612	CGGCAGTGATCTCCTGCGCTTGATCCCCGTGTGACAGGAACTCTCAAAAT	10	11286618	F			NA	NA	CUGBP2	NM_001025076;NM_006561;NM_001025077;NM_001083591	Body;Body;Body;Body					NA	10:11286561-11286775			NA
cg00101555	45678322	45678322	45678322	AAAAAATTCAAATAAAATCAATATTTTATTTCACTCTTTCACATATTAAC	0.01898	NA		II			TCCAAGTTAAAAGAGAATTCAAATGAGGTCAATATTTTGTTTCACTCTTTCACATGTTAA[CG]TGAGACCTAATTTTCATTTTCAGACCACCAGAGTAAGATATTGGTTTTAGCATTTATATT	37	2	39185781	GAGAATTCAAATGAGGTCAATATTTTGTTTCACTCTTTCACATGTTAACG	2	39039285	R			NA	NA	LOC100271715	NM_001145451	Body	chr2:39186777-39187968	N_Shore			NA				NA
cg00101712	27769314	70665311	27769314	CACCATTAAAATACAACCACAAAACCTCATCCAATAAACAACCAAATACA	0.00313854	70665311	CGCCATTAAAATACAACCGCAAAACCTCATCCAATAAACAACCGAATACG	I	T	Red	GGTTTTACAGGACCCTCTGTCTCCGGCCGTCCTCCAAGGGGTGAAGGCGAGAAAGGAGCA[CG]TACTCGGCTGCCCACTGGATGAGGTCCTGCGGCTGCACCCTAATGGCGGCTTTGGCAAAC	37	3	123699208	CGCCATTAGGGTGCAGCCGCAGGACCTCATCCAGTGGGCAGCCGAGTACG	3	125181898	F			NA	NA	ROPN1	NM_017578	Body					NA	3:125181804-125181987	3:123697901-123699646	Unclassified	NA
cg00101728	60742344	60742344	60742344	RATCAAAATCTTAAAACTCAAACTCCAAATATAACRTACCATCTTCTAAC	0.00425201	NA		II			AGAAAGAAAGGAGTGGGTAGGTCCTGATGGGAATGAAGCTAGAGAAAAGGAGGAAATGTC[CG]CTAGAAGATGGCACGCCATATCTGGAGTCTGAGCTTTAAGACCTTGATCGAGCCTGAGGG	37	6	2953027	ATCAAGGTCTTAAAGCTCAGACTCCAGATATGGCGTGCCATCTTCTAGCG	6	2898026	F			NA	NA	SERPINB6	NM_004568	Body					TRUE	6:2897936-2898486	6:2951932-2953705	Unclassified	NA
cg00102166	71790327	71790327	71790327	AACAAACTAACTAACTAACATAATAAAACATTAAAAACATAATAAACCTC	0.00110291	NA		II			AAAATATGAAAGGCAGGCTAACTGACTGACATGATAGGACATTAAGGACATGATAGACCT[CG]GGTTTGAACCAGCTCAACTGTATACTGGCCCGGCCGCGATCCTGGGCGAGTTCCTGGCCA	37	1	43425337	GCAGGCTAACTGACTGACATGATAGGACATTAAGGACATGATAGACCTCG	1	43197924	R			NA	NA	SLC2A1	NM_006516	TSS1500	chr1:43423467-43424768	S_Shore			NA				NA
cg00103329	58633447	58633447	58633447	CRAACCCAATACTTTACTTAACATTCRAAATATAAAATAAACAAACCCTC	0.000955653	NA		II			AGCGGTGTACCCGAGCCCAGTGCTTTGCTTGGCATTCGGGGTGTGAAGTGGACAGACCCT[CG]CGCGTCCTGGGGAGGACAGCCAAATGCCTGGCGCAGCTAAGGGCCAAAGCAAGGCATGGT	37	1	204121923	GAGCCCAGTGCTTTGCTTGGCATTCGGGGTGTGAAGTGGACAGACCCTCG	1	202388546	R			NA	NA	ETNK2	NM_018208	TSS1500	chr1:204120398-204121109	S_Shore			NA				NA
cg00103783	63809353	63809353	63809353	ACTAAATAAAACTCACCRTAAAACAAATCCCACTAAACRAAAAATTAATC	0.0298572	NA		II			CGAGGCGGACGGACCGCTTAAACGGCTGCTCGTGCCGATTCTTTTACCTGAGAAATGCTA[CG]ACCAACTTTTCGTTCAGTGGGACTTGCTTCACGGTGAGTTTTATTCAGCATCCGATCCAA	37	17	7487249	CGACCAACTTTTCGTTCAGTGGGACTTGCTTCACGGTGAGTTTTATTCAG	17	7427973	F			NA	TRUE	MPDU1	NR_024603;NM_004870	Body;1stExon	chr17:7486285-7487431	Island			NA	17:7427022-7428155	17:7486564-7487870	Promoter_Associated	NA
cg00103806	34666355	34666355	34666355	TAAACTAAATACAATCACATCAAACTTTCCCAAAATTAAAACACTCRACC	6.33e-07	NA		II			CACATTTTCCTTGAACTGAATACAATCACATCAAACTTTCCCAGAATTGAAACACTCGAC[CG]TCCACACACCCATTATAACCATGGGACCAGCCCAAATGGGCCGTACTTTGTTGATAACAA	37	10	90612232	CGGTCGAGTGTTTCAATTCTGGGAAAGTTTGATGTGATTGTATTCAGTTC	10	90602212	R			NA	NA	ANKRD22	NM_144590	TSS1500					NA				NA
cg00103908	23644320	23644320	23644320	CRATTCCCRTAAAAAACRCCCTAAATCTAAAATAACTAAATCACAATAAC	0.000674989	NA		II			TGTACAAGGATCGATTCCCGTGGAGAGCGCCCTGGGTCTGGGATGGCTGGGTCACAATAA[CG]CTATGTCTCACTTTTTGGGGAACCTCCAGACTGTTTACCACAGTGGCTATACCATTTCAC	37	1	3184106	GATTCCCGTGGAGAGCGCCCTGGGTCTGGGATGGCTGGGTCACAATAACG	1	3173966	R			NA	NA	PRDM16	NM_022114;NM_199454	Body;Body	chr1:3184546-3184824	N_Shore			NA	1:3173758-3174684			NA
cg00103961	12689386	12689386	12689386	ATATAAAAACAAAAACCCTACTAACTTAAAAACAAATAACACATTAATCC	0.00437092	NA		II			AGCCACTCAGTGTGTGGGGGCAGGGGCCCTGCTGACTTAGAAACAAGTGGCACATTGATC[CG]CATTCAAACTTGCCAGCCAATCAACCACAGCCCCGCGCACAGACTCTCCCAGGTGGGACT	37	20	62096129	CGGATCAATGTGCCACTTGTTTCTAAGTCAGCAGGGCCCCTGCCCCCACA	20	61566573	R			NA	NA	KCNQ2	NM_172108;NM_172106;NM_172107;NM_172109;NM_004518	Body;Body;Body;Body;Body	chr20:62097193-62098254	N_Shore			NA				NA
cg00105253	38710393	38710393	38710393	AATCCCCAAAACAACCAAAAAATTCCACTACCAAAAAAATCRAATTAAAC	0.000748839	NA		II			AAGCCTTCCCTGATCCCCAGGGCAACCAAGGAGTTCCACTGCCAAGAGGGTCGGATTGGG[CG]GGCGGGAAGGATGGGGCCCAGCAATGCTTCCTTGAAAGGATGAGTGGTGCCCCCTCAGAT	37	14	105647194	ATCCCCAGGGCAACCAAGGAGTTCCACTGCCAAGAGGGTCGGATTGGGCG	14	104718239	R			NA	TRUE	NUDT14	NM_177533	Body	chr14:105647469-105647827	N_Shore			NA		14:105646800-105648756	Unclassified	NA
cg00105400	31681372	31681372	31681372	AATAACCCTAATAAAACAACRAACAACCCTAACCCTACAAAACTACCCAC	0.00298766	NA		II			CCCTTGGCCGGTCCACCTTGCTCGGCGGACACAAAGACTACAGGCGCTGGGGTGGTCGGT[CG]TGGGTAGCTCTGCAGGGCCAGGGCTGCCCGCTGTTCCACCAGGGCCACCATCTCGGCCAC	37	19	46216179	GTGGCCCTGGTGGAACAGCGGGCAGCCCTGGCCCTGCAGAGCTACCCACG	19	50908019	F			NA	NA	FBXO46	NM_001080469	Body	chr19:46214961-46216180	Island			NA	19:50906798-50908114			NA
cg00105852	22765306	25808484	22765306	CAACCAACCTAACCACCTTTCAAAACCTCCAAATTTAAAAAAAACACACA	0.00539179	25808484	CGACCGACCTAACCACCTTTCAAAACCTCCGAATTTAAAAAAAACACACG	I	C	Grn	GACCCCACCCCACGACCGGCCTGGCCACCTTTCAGGGCCTCCGGGTTTGGGAGGAGCACA[CG]CAGGGCAGCCCACCGAGCCCCTCTGTGGCATGGGGGTGACGCGTTCCATCTGCGCCCAGC	37	12	133100010	CGACCGGCCTGGCCACCTTTCAGGGCCTCCGGGTTTGGGAGGAGCACACG	12	131610083	R			NA	NA	FBRSL1	NM_001142641	Body	chr12:133102168-133102604	N_Shelf			NA	12:131610083-131610152	12:133099310-133101431	Unclassified	NA
cg00106432	66724453	66724453	66724453	ACAACAACRACTCATTCCTTAACCTCCTTTAAAATAATTATCCTTAAAAC	0.0132492	NA		II			GGAGAGCAGAGACAACAGCGGCTCATTCCTTAGCCTCCTTTAAGATAGTTATCCTTAAGG[CG]TCTTTACTTCGACCTTCAGCCCTTAGAACATGCAGTCTTGCGGTGGGCTGATTCAAGATC	37	15	84540266	CGCCTTAAGGATAACTATCTTAAAGGAGGCTAAGGAATGAGCCGCTGTTG	15	82331270	R			NA	NA	ADAMTSL3	NM_207517	Body					TRUE				NA
cg00106609	59710352	59710352	59710352	CRTCACACAAAAAAACACTAAAATAATTAAATATACACAACTCTACCTAC	3.81e-08	NA		II			GCCTTGGGCACAGCTGGCACTTGGGGCCCCCCATGTGGCACAGCCTCAGACAGACACCCA[CG]CAGGCAGAGTTGTGCACATCCAACCATCTCAGTGTCTCCCTGTGTGACGCACGGCTGTGG	37	22	50714562	CGCAGGCAGAGTTGTGCACATCCAACCATCTCAGTGTCTCCCTGTGTGAC	22	49056689	F			NA	NA	PLXNB2	NM_012401	Body	chr22:50716018-50716656	N_Shore			NA	22:49056292-49056946	22:50714534-50715276	Unclassified	NA
cg00107016	60738410	11788424	60738410	CAAACCACACATAAAAATAAAAACTACCAAAAAACAACTAATAACAAACA	0.0115008	11788424	CGAACCACGCGTAAAAATAAAAACTACCGAAAAACAACTAATAACAAACG	I	A	Red	CAGCCGCCGGGCCGGACCACGCGTAGGGGTGGGGGCTGCCGAGAAGCAACTAGTGGCAAG[CG]GGACTCAGAGCCGCGCGGGAGGGGAGCTAGTGGTGACGGAACAGAGCACAGTAAGAAAAG	37	17	39890994	CGGACCACGCGTAGGGGTGGGGGCTGCCGAGAAGCAACTAGTGGCAAGCG	17	37144520	R			NA	NA	HAP1	NM_177977;NM_001079870;NM_001079871	TSS200;TSS200;TSS200	chr17:39889956-39891489	Island			NA	17:37143503-37145015	17:39890561-39891346	Unclassified_Cell_type_specific	TRUE
cg00107046	24601312	24601312	24601312	CAAAAAAAACCAAACCCCCTAACATTTTCTCTAACTCTACTTCCAAAACC	7.17e-08	NA		II			TGACCAGGAAGCAGGAAAGGCCAAGCCCCCTGGCATTTTCTCTGGCTCTGCTTCCAGGAC[CG]AGTCATATCCGCCACTCACAAGGACAGCCAGGAAGTGACTCTTCCTCCCCCAGTGGCCAG	37	1	16465562	CGGTCCTGGAAGCAGAGCCAGAGAAAATGCCAGGGGGCTTGGCCTTTCCT	1	16338149	R			NA	NA	EPHA2	NM_004431	Body	chr1:16464376-16464621	S_Shore			TRUE		1:16464942-16465584	Unclassified	TRUE
cg00107187	47697316	47697316	47697316	TACRCCTACTACTTCTTAACCTTCCTATTCAACTTCRTAATAATAATCCC	0.000553014	NA		II			CCACATGCCCTCGGTGAAGAGCAGGCAGCGGCCGCGGAAGTCGTGGCCGTTCTCGGACAG[CG]GGACCACCACCACGAAGCTGAACAGGAAGGCCAAGAAGTAGCAGGCGCACTGAGCGAAAA	37	14	105070998	CGGGACCACCACCACGAAGCTGAACAGGAAGGCCAAGAAGTAGCAGGCGC	14	104142043	F			NA	TRUE	TMEM179	NM_207379	1stExon	chr14:105070518-105071463	Island		DMR	TRUE	14:104141463-104142634			NA
cg00107629	57761438	57761438	57761438	CTACTACRTTAAAAAACAATACTATATAACCAAAATACTAATAAATACTC	0.000344193	NA		II			TCCGGGGACTTCTGCTACGTTGGGGAGCAGTACTGTGTAGCCAGGATGCTGGTGAGTGCT[CG]TAGGGGCACGCCGCCCCCTGCTGGTGGAGCCAGTAGCCGCAGCCCTTCCGGGAACGTGGG	37	11	46389307	CGAGCACTCACCAGCATCCTGGCTACACAGTACTGCTCCCCAACGTAGCA	11	46345883	R			NA	NA	DGKZ	NM_001105540;NM_201533;NM_003646;NM_201532	Body;Body;Body;Body	chr11:46389074-46389378	Island			TRUE	11:46345651-46345954	11:46389076-46389609	Gene_Associated	NA
cg00107630	54618409	54618409	54618409	TCTATATTTACACACAAACAATAAAAAACCAACACAAATAAAAATCCCAC	0.00876906	NA		II			TCATTGTGCACTCTGTGTTTACACACAAACAGTGGAAGACCAACACAAATAAAAATCCCA[CG]TCTCCCTACACAGCTCCTGCTATACCCAGCCATCTGGTGACTACCTCGCTAGCCAAATCC	37	9	120174408	CGTGGGATTTTTATTTGTGTTGGTCTTCCACTGTTTGTGTGTAAACACAG	9	119214229	R			NA	NA	ASTN2	NM_198186;NM_014010;NM_198187	Body;Body;Body	chr9:120175253-120177496	N_Shore			NA				NA
cg00107890	52751380	52751380	52751380	AACAAACTTCAAACATTTCAAAATCCTCRACCATAATACCATCTAATAAC	1.73e-05	NA		II			GTGGTATGGCTCAGCGTGCTTTGTCTGTAATGTTGGCACTGGATCCTGGTGAGCTTTTCA[CG]TCATCAGATGGTATTATGGCCGAGGACCCTGAAATGCCTGAAGCCTGCTTGTGGGATTCT	37	15	71492746	CGTCATCAGATGGTATTATGGCCGAGGACCCTGAAATGCCTGAAGCCTGC	15	69279800	F			NA	NA	THSD4	NM_024817	Body					TRUE				NA
cg00108715	58716324	58716324	58716324	ACTATAAAACTTCCCTAACCCTCTAACCTAACAACTCCTACTTTATCATC	9.37e-13	NA		II			TTGCAGGGGCCCCAGCTCTAAGACTCCAGGGGATCCCTGTCTCAGCCACAACCCCAGTGC[CG]ATGACAAAGCAGGAGCTGCCAGGCCAGAGGGCCAGGGAAGCCCCACAGTGTGCCTGGCAG	37	3	52565015	CTGTGGGGCTTCCCTGGCCCTCTGGCCTGGCAGCTCCTGCTTTGTCATCG	3	52540055	F			NA	NA	NT5DC2	NM_001134231;NM_022908	Body;Body	chr3:52567009-52568807	N_Shore			NA		3:52564840-52565242	Unclassified_Cell_type_specific	NA
cg00108873	60728480	60728480	60728480	CTATAAATAATATATCCTAAAAACACCAACTAACAACTTCTCCTAACCAC	0.0275931	NA		II			GGCCTGGGGGAGGAAGGGCAGGCACTGCCCTAGGAAGCACCATGGGCTCCCACTCAGGGC[CG]TGGCCAGGAGAAGCTGTCAGCTGGTGTCTCCAGGACACACCATCCATAGCATCTGACCCC	37	9	138659743	TATGGATGGTGTGTCCTGGAGACACCAGCTGACAGCTTCTCCTGGCCACG	9	137799564	F			NA	NA	KCNT1	NM_020822	Body	chr9:138660497-138661224	N_Shore			NA				NA
cg00109148	25611347	25611347	25611347	TACACCTACTCCTAAAACTCCCAAAATAACTCTTCAACTAAACTATAACC	0.00260475	NA		II			ACAGACATTGTTGCACCTACTCCTAGAGCTCCCAAGGTGGCTCTTCAACTGGGCTGTGGC[CG]GCGTACTTCCTGCAGTAGGGCAGGCAGCAGGCTGAGGGAAGGCTGCTTCTCCTGGAAGAC	37	13	29913347	CGGCCACAGCCCAGTTGAAGAGCCACCTTGGGAGCTCTAGGAGTAGGTGC	13	28811347	R			NA	NA	MTUS2	NM_001033602	Body	chr13:29913886-29914301	N_Shore			NA				NA
cg00109164	43661360	43661360	43661360	ACTACTTTAATTAATTATACCTTCCCTTCTCTAATCTCCTTAAAATAATC	0.000498803	NA		II			ATTCGTGTTTAACTCACTGAATGAATACGTGGGTTTGGGTGGGAATCATCCCTGTGTCTA[CG]ATCATCTCAAGGAGACCAGAGAAGGGAAGGCACAACCAATCAAAGCAGTTTCCCCAATTA	37	1	167022611	CTGCTTTGATTGGTTGTGCCTTCCCTTCTCTGGTCTCCTTGAGATGATCG	1	165289235	F			NA	NA	GPA33	NM_005814	3'UTR					NA		1:167022609-167022673	Unclassified_Cell_type_specific	NA
cg00109293	36669333	36669333	36669333	TCCCAAATCCACTACTAACCATTTTCCACCCTACTTCTAAAAATACTAAC	0.00448374	NA		II			GGGTGGCCGGTGGCCGCGCGGTGCCTAGCACCTCCTGTGTCGTCGGTGTGGAGGAGGGAC[CG]TCAGCATTTTCAGAAGCAGGGTGGAAAATGGCCAGCAGTGGACCTGGGAGGGCACATCTT	37	1	3149830	CCCAGGTCCACTGCTGGCCATTTTCCACCCTGCTTCTGAAAATGCTGACG	1	3139690	F			NA	NA	PRDM16	NM_022114;NM_199454	Body;Body	chr1:3147845-3148081	S_Shore			NA	1:3139637-3139691			NA
cg00109344	15795365	15795365	15795365	AACATAACTTTTAACTATCAAAACAACTATACAATAATAAATAAATCACC	1.21e-06	NA		II			TCTCAGCTTCGAGCATGGCTTTTGGCTGTCAGGGCAGCTGTACAATAGTGGGTAAGTCAC[CG]GCCTTTGGGCTCAGTTTTCTCATCCATCAAATGGACATTAATGATTTCTACAATGAGAGC	37	9	116344532	GCATGGCTTTTGGCTGTCAGGGCAGCTGTACAATAGTGGGTAAGTCACCG	9	115384353	R			NA	NA	RGS3	NM_130795;NM_021106;NM_144488;NM_134427	Body;5'UTR;Body;5'UTR	chr9:116346400-116346603	N_Shore			NA		9:116343993-116345494	Promoter_Associated	NA
cg00109776	15771311	15771311	15771311	AAAAAACTTTTATAACCTAACCTATAATCTATCCTAAAAATTATTTATAC	0.00155119	NA		II			CAAATATTATTGAGGAGCTTTTATGGCCTAACCTGTGGTCTATCCTGGAGGTTGTTTGTG[CG]TACAATACATAGTCTTCAATATCTTTTTTTTTTTTTTCATTTTTTGAGAGGGAGTTTCGC	37	19	54232332	CGCACAAACAACCTCCAGGATAGACCACAGGTTAGGCCATAAAAGCTCCT	19	58924144	R			NA	NA	MIR518E	NR_030209	TSS1500					NA				NA
cg00109780	19702459	19702459	19702459	TAAAAAACTCAAATACCAAAAAACTCTCTCTTAACAAAACTAACCAACCC	1.62e-05	NA		II			GGTCACGGGCCTGGGGGGCTCAAATGCCAGGGAGCTCTCTCTTGACAGAGCTGACCAGCC[CG]GCCCCTTAGGTCACGGGCCTGGGGGGCTCAAATGCCAGGGAACAGAGCTGACCAGCCCGT	37	9	96337982	GGGGGGCTCAAATGCCAGGGAGCTCTCTCTTGACAGAGCTGACCAGCCCG	9	95377803	R			NA	NA	PHF2	NM_005392	TSS1500	chr9:96338040-96339836	N_Shore			NA	9:95377606-95379657			NA
cg00110695	24678402	62672397	24678402	ACCAAATAATAAACACAAAACAATAAATACAACACACCATACACCAACCA	7.37e-07	62672397	ACCAAATAATAAACGCAAAACAATAAATACAACGCACCGTACGCCAACCG	I	A	Red	TCACCAGGGAGTGCCAGATAGTGGGCGCAGGACAGTGGGTGCAGCGCACCGTGCGCCAGC[CG]AAGCAGGGCGAGGCATTGCCTCACTTGGGAAGCACAAGGGATCAGGGAGTTCCCTTTCCT	37	6	99358736	CGGCTGGCGCACGGTGCGCTGCACCCACTGTCCTGCGCCCACTATCTGGC	6	99465457	R			NA	NA	FBXL4	NM_012160	Body					NA	6:99465338-99465639			NA
cg00111359	54686427	54686427	54686427	CRATCCTCTCTACACCRACTAAAAAATAAATTAAACAAAATCCCCCAATC	0.00659259	NA		II			CCACCGCTCTCCGGTCCTCTCTGCACCGGCTGGGAGGTGAATTAGGCAGAATCCCCCAGT[CG]CCGCGGGAGCAGCGCCTGCCGAGCAGCCGTGCCCGGAGCCCGCCCCATGCAGGAGCAGAG	37	2	26205029	GGTCCTCTCTGCACCGGCTGGGAGGTGAATTAGGCAGAATCCCCCAGTCG	2	26058533	R			NA	NA	KIF3C	NM_002254;NM_002254	1stExon;5'UTR	chr2:26204554-26205649	Island			NA	2:26057468-26059529	2:26204073-26205999	Promoter_Associated	NA
cg00111503	30608325	30608325	30608325	RTATCTATAAAAAACATAATAACTATAAACTTCTTCTCCTACATAAAAAC	3.71e-05	NA		II			GTAGGCGTGGAAGAAGCTCCACTCCTCACACTGGGAGAAGGCGGCCGCCCCGATGCACAG[CG]TCCCCATGCAGGAGAAGAAGCCCACAGTCACCATGTTCTCCATAGACACGTCAGTGTTGC	37	8	140631116	TGTCTATGGAGAACATGGTGACTGTGGGCTTCTTCTCCTGCATGGGGACG	8	140700298	F			NA	NA	KCNK9	NM_016601	Body	chr8:140631096-140631332	Island			NA	8:140699761-140700421			NA
cg00111665	65699466	65699466	65699466	CTCRATAATTCTACRCTCCATAAATATCTCTTTACATCTATTCACAATAC	0.00333402	NA		II			AAACCTTTTGCCTCGGTAATTCTGCGCTCCATGGGTGTCTCTTTACATCTATTCACAGTA[CG]GCTGCTGCCCACGGACGGCTTGCCCTGTGACAGTGCTGGTGACTCTACGCTCGGCTCGCC	37	2	237120186	TCGGTAATTCTGCGCTCCATGGGTGTCTCTTTACATCTATTCACAGTACG	2	236784925	R			NA	NA	ASB18	NM_212556	Body	chr2:237119978-237120257	Island			NA	2:236784769-236784992			NA
cg00111978	24803503	24803503	24803503	CTATACCTCAATAACACATATTAATAAATACTAACCATATACTAAACATC	0.00771961	NA		II			TGCATACACACCTATGCCTCAGTGACACATGTTAGTGAGTGCTGGCCATGTGCTAGGCAT[CG]TGCTGGATTTTAGTGATACAGTGAAGAGCAAAATAGACTTAGTGCCTAGAATTATGAAAG	37	2	102978529	TATGCCTCAGTGACACATGTTAGTGAGTGCTGGCCATGTGCTAGGCATCG	2	102344961	R			NA	NA	IL18R1	NM_003855	TSS1500					TRUE				NA
cg00112260	18633377	18633377	18633377	AAATAAAAAAAATACTAAACAAAAACTACTCTTAAACACTAATACCTCAC	0.0195269	NA		II			AAAGGCAGGCCCTCTATACACTCGTTGACCAAGCACCTCTCCCCCTGCATTTCAGTTAGC[CG]TGAGGTATCAGTGTCTAAGAGTAGTTTCTGTCTAGCATCTCCCCCACCCAACAGTAAGCT	37	1	32104920	GGTGGGGGAGATGCTAGACAGAAACTACTCTTAGACACTGATACCTCACG	1	31877507	F			NA	NA	PEF1	NM_012392	Body					TRUE				NA
cg00112517	37660425	37660425	37660425	CCTCTCTACTAAACTCCATCAATAATACAACTTCAAATTCTAAAAAAACC	0.00992294	NA		II			TCCCCCTTTATCCTCTCTGCTGGACTCCATCAATAATGCAGCTTCAAGTTCTGGGGAGAC[CG]CAGGGGGCCCCCCAGCTGGCTCCCCAGGCCTTGGCTCTAACTCCCACCCTCCTCCCAGCC	37	17	37783011	CTCTCTGCTGGACTCCATCAATAATGCAGCTTCAAGTTCTGGGGAGACCG	17	35036537	R			NA	TRUE	PPP1R1B	NM_032192	TSS200	chr17:37783314-37783919	N_Shore			NA				NA
cg00112952	55681447	55681447	55681447	CTAAAACAACAAAAAACACCTATTACAACATATAAACTAAACAAATCTCC	0.00131997	NA		II			ATAATTTATGAAGGATTTTTATTCTTGATTTGGTACCTTATGCATAGACTGTAAAACTAA[CG]GAGATCTGCTCAGCTTACATGTTGCAACAGGTGTTCCCTGCTGCCCCAGTTGATGTTCTG	37	1	247616523	CGGAGATCTGCTCAGCTTACATGTTGCAACAGGTGTTCCCTGCTGCCCCA	1	245683146	F			NA	NA	OR2B11	NM_001004492	TSS1500	chr1:247614695-247614944	S_Shore			NA				NA
cg00113050	35629490	35629490	35629490	TACAAACCAACTTCCTATTTATACCTATAAATAAAACTTTATAAATCTTC	0.0146778	NA		II			CCTCCCTGCAATACAGGCCAACTTCCTGTTTGTGCCTGTGGGTGGGACTTTATGAGTCTT[CG]AGAAGCCCAGCCATGCCCCGTGGGGGTCAGAACCCGCAGGCCTGCTCACCTGGGCAGATA	37	10	102756314	ACAGGCCAACTTCCTGTTTGTGCCTGTGGGTGGGACTTTATGAGTCTTCG	10	102746304	R			NA	NA	LZTS2	NM_032429	TSS1500	chr10:102756834-102759798	N_Shore			NA		10:102756115-102756326	Promoter_Associated_Cell_type_specific	NA
cg00113321	62790500	62790500	62790500	AAACATAATACTCTCTAACCRAACAACCTCACCTCCAATAAAAACTAAAC	0.00213965	NA		II			CCTACATGCAGGAGCATGGTGCTCTCTGGCCGGGCAGCCTCACCTCCAGTGGAAGCTAAG[CG]TTGTGCCCGGGCAGGGGGCGCAGGCAGGAGGGCTGAGCTTCCCTGGTTATCCCCTGAGGC	37	7	157530177	CGCTTAGCTTCCACTGGAGGTGAGGCTGCCCGGCCAGAGAGCACCATGCT	7	157222938	R			NA	NA	PTPRN2	NM_002847;NM_130842;NM_130843	Body;Body;Body	chr7:157524157-157526741	S_Shelf			TRUE	7:157222660-157223071			NA
cg00114029	69769378	62623308	69769378	AAAATAAAAAACAAAACCTTTCTAAAATTAAAAACTATAACCAACAAACA	0.0218158	62623308	GAAATAAAAAACGAAACCTTTCTAAAATTAAAAACTATAACCGACGAACG	I	C	Grn	TGGCTTCCCGGCGGGATGGGGGGCGGGGCCTTTCTGAAGTTGAAGGCTGTGGCCGGCGAG[CG]CAGAGACGCAGTGGGTGAGGCTCGCGGCCCTGCCTGGGTCCTGGGCCCGCGCCCGACTCC	37	1	35351407	CGCTCGCCGGCCACAGCCTTCAACTTCAGAAAGGCCCCGCCCCCCATCCC	1	35123994	R			NA	NA	DLGAP3	NM_001080418	Body	chr1:35350878-35351854	Island		DMR	TRUE	1:35123466-35124402	1:35350406-35352078	Unclassified_Cell_type_specific	TRUE
cg00114160	43809432	43809432	43809432	AAACACAACCAACTAAATTTCATTATAAAAAATATCTCCACAAAAAAATC	5.91e-06	NA		II			TTGCCCTTCTGTCCCCACCAGCAGATAGATGACTTTTTATGTGAGGTCCCATCTCTGATT[CG]ACTCTCCTGTGGAGATACCTCCTACAATGAAATCCAGTTGGCTGTGTCCAGTGTCATCTT	37	6	29430096	CGACTCTCCTGTGGAGATACCTCCTACAATGAAATCCAGTTGGCTGTGTC	6	29538075	F			NA	NA	OR2H1	NM_030883	Body					NA				NA
cg00114312	65658336	51618505	65658336	TCAACAAAAAAAATACCACCAAACCTCTACCCAAACATCTACCATAAACA	0.00612912	51618505	TCAACGAAAAAAATACCGCCAAACCTCTACCCAAACATCTACCATAAACG	I	A	Red	GGGGCGGACCAGTCAGCGAAGGGAGTACCGCCAGGCCTCTGCCCAAACATCTGCCATGGG[CG]GCAGCCGTGGAAGACGGACCCTGCAGGTGGTGGTGGTGGGGATATGGGGGGTGGGAATAT	37	16	1420425	CGCCCATGGCAGATGTTTGGGCAGAGGCCTGGCGGTACTCCCTTCGCTGA	16	1360426	R			NA	NA	UNKL	NM_023076	5'UTR	chr16:1420170-1420442	Island			NA		16:1420258-1420720	Unclassified_Cell_type_specific	TRUE
cg00114478	74713338	74713338	74713338	CAATCCCCTCCCTTCCTAAATCACTTCATTTACATAAACTATCAAACACC	0.00134305	NA		II			CCTGGCATAGCCAGTCCCCTCCCTTCCTGAGTCACTTCATTTGCATAAACTATCAGGCAC[CG]GCTCAGAGGCCCACCATGAATAACAAAGACACTCTTATCACTCTGAAAATTTCAAGGGTT	37	8	73658110	AGTCCCCTCCCTTCCTGAGTCACTTCATTTGCATAAACTATCAGGCACCG	8	73820664	R			NA	NA	KCNB2	NM_004770	Body					TRUE				NA
cg00114503	54796359	54796359	54796359	CCTCCCAAATAAAATAATAATAAAACAAACACACTCCTCAATTCCCAAAC	0.00618165	NA		II			GCACCTCTGCCCCGCCGCCCCGTCTGAGATGTGAAGAGCACCTCTGCCCGGCCGCGACCC[CG]TCTGGGAACTGAGGAGTGTGTCTGCCCCACCACCACCCCATCTGGGAGGTGAGGAGCGTC	37	3	178750446	CTCCCAGATGGGGTGGTGGTGGGGCAGACACACTCCTCAGTTCCCAGACG	3	180233140	F			NA	NA	ZMAT3	NM_022470;NM_152240	Body;Body					NA	3:180232633-180233519			NA
cg00114618	69648408	45748452	69648408	TCATCTCACTAAAAAATATCAAACAACACACACAAATCAATAAATACACA	0.000552316	45748452	TCATCTCACTAAAAAATATCAAACAACGCGCGCAAATCAATAAATACGCG	I	C	Grn	GAGGTACCGGGTTCATCTCACTAGGGAGTGTCAGACAGCGCGCGCAGGTCAGTGGGTGCG[CG]CACCATGCGTGAGCCGAAGCAGGGAGAGGCATTGCCTCACCTGGGAAGCGCAAGGGGTCA	37	5	64666244	CGCGCACCCACTGACCTGCGCGCGCTGTCTGACACTCCCTAGTGAGATGA	5	64702000	R			NA	NA	ADAMTS6	NM_197941	Body					NA	5:64701907-64702224			NA
cg00115458	59804365	14632448	59804365	TCAAAACTCAAAATCAACTTACCAAAAATCCTTTCAATCCAAAAAACCCA	0.0028355	14632448	TCAAAACTCGAAATCAACTTACCGAAAATCCTTTCGATCCAAAAAACCCG	I	T	Red	AAGCGAGGTGGGTCAGAGCTCGGGGTCAACTTACCGGGGGTCCTTTCGGTCCAGGAAACC[CG]TTGGGACCCTGAGGTCCAGGGAGGCCCTAGAGACAGAGGTGGGGGGAGTCAGGAGAATGG	37	6	33141305	CGGGTTTCCTGGACCGAAAGGACCCCCGGTAAGTTGACCCCGAGCTCTGA	6	33249283	R			NA	NA	COL11A2	NM_080679;NM_080681;NM_080680	Body;Body;Body					NA				NA
cg00115654	22688488	22688488	22688488	CAAAAACCTTAATCTTAATCCCAACCAAAAACCRACTCCTAATAAAAAAC	1.56e-05	NA		II			CTCTGCGCCGGCAGGAGCCTTAGTCTTGGTCCCAGCCAAGAGCCGGCTCCTGGTGGGGGG[CG]CGGGCCGAGAACTCCTGTTCCCACTCACAAAAGGCCACGCTTCCAAACGCTTCCATCCTC	37	9	136294920	AGGAGCCTTAGTCTTGGTCCCAGCCAAGAGCCGGCTCCTGGTGGGGGGCG	9	135284741	R			NA	NA	ADAMTS13	NR_024514;NM_139027;NM_139025;NM_139026	Body;Body;Body;Body	chr9:136294738-136295236	Island			NA	9:135284498-135285028	9:136294653-136295202	Unclassified	NA
cg00116234	58612339	58612339	58612339	TTCAATATCCRATTCTAATTCCRACAAAAATCCAAACATAAAATACTACC	4.3e-05	NA		II			TTAGCAGCTTATTCAGTGTCCGATTCTGATTCCGGCAAGGATCCAAGCATGGAATGCTGC[CG]TCGGGCAACTCCTGGCACACTGCTCCTCTTTCTGGCTTTCCTGCTCCTGGTAAATGCCTT	37	9	18474243	CGGCAGCATTCCATGCTTGGATCCTTGCCGGAATCAGAATCGGACACTGA	9	18464243	R			NA	TRUE	ADAMTSL1	NM_052866;NM_001040272	1stExon;1stExon				DMR	TRUE				NA
cg00118158	29706333	29706333	29706333	TCCAATTCCCRACATACCAACATATACATTAAACTCAAAATATATTACAC	0.000297891	NA		II			TCTAAGAGAATTCCAATTCCCGGCATGCCAACATATACATTAAACTCAAAATGTGTTGCA[CG]TTATGAGTTATGTTTCTTTGTTACTAGCAGATGGTAAAAATTTCTATCATCTGCAAAGTT	37	2	100629297	CGTGCAACACATTTTGAGTTTAATGTATATGTTGGCATGCCGGGAATTGG	2	99995729	R			NA	NA	AFF3	NM_001025108;NM_002285	Body;Body					TRUE				NA
cg00118363	63729314	10756492	63729314	TTCTAAATAAACATAAACTCAATAAACCCCACACTCCCAATAACTAACCA	1.84e-05	10756492	TTCTAAATAAACGTAAACTCAATAAACCCCGCACTCCCAATAACTAACCG	I	A	Red	GCACCCTCCGCAGCTGCTGGCCCGGGTGCTAAGCCCCTCACTGCCTGGGGCCGGCAGCCC[CG]GCCAGCCACTGGGAGTGCGGGGCCCACTGAGCCCACGCCCACCCAGAACTGGCGCTGGCC	37	8	52317644	TTCTGGGTGGGCGTGGGCTCAGTGGGCCCCGCACTCCCAGTGGCTGGCCG	8	52480197	F			NA	NA	PXDNL	NM_144651	Body	chr8:52321162-52322221	N_Shelf			NA	8:52480027-52480375			NA
cg00118507	38766365	38766365	38766365	CAATCTCCCTTCTTCTCTAATCAAATTTATATCTTAAATATTCTCAAAAC	6.59e-06	NA		II			AAAGCCACATAGCATCACACTTTTTACCCAAGGTTTTACTATACTGCAGACTTTTGTGTA[CG]TTTTGAGAACATCCAAGACATAAACCTGACCAGAGAAGAAGGGAGATTGTATCCAAGAAT	37	1	113215934	AATCTCCCTTCTTCTCTGGTCAGGTTTATGTCTTGGATGTTCTCAAAACG	1	113017457	F			NA	NA	MOV10	NM_001130079;NM_020963	TSS1500;TSS1500	chr1:113217475-113218097	N_Shore			TRUE				NA
cg00119057	53748446	53748446	53748446	TACAAACCAATAAACACCTTCTAAAAATTTAACRAATCAATAACTAAAAC	0.000724676	NA		II			TCAAACCTCCCTGCAGACCAATGGACACCTTCTAAGAGTTTGGCGAGTCAGTGACTGAAG[CG]CCCGTCCATTCCAAGGTGTGTGCACGGCGTTTTCTTCTTTGACAGCTCCGGAGTGGGGGA	37	18	32073462	GCAGACCAATGGACACCTTCTAAGAGTTTGGCGAGTCAGTGACTGAAGCG	18	30327460	R			NA	NA	DTNA	NM_001392;NM_001392;NM_032979;NM_032979;NM_032975;NM_032975	1stExon;5'UTR;1stExon;5'UTR;1stExon;5'UTR	chr18:32073444-32074292	Island	high-CpG:30327194-30327886		TRUE	18:30327210-30328444			TRUE
cg00119186	54646461	54646461	54646461	AAATAATAATCAAAAACCATAACTATCAAAAAACACACCTCACAAATACC	3e-07	NA		II			TGCATATGGCCAGGTAGTGGTCAAAGGCCATAACTGTCAAGAGACACACCTCACAGATGC[CG]GTGGAATGGAAGAAATACATCTGCAGGAGACAACCATTGAAGGAAATGCTCCTCTCACTA	37	1	158670124	CGGCATCTGTGAGGTGTGTCTCTTGACAGTTATGGCCTTTGACCACTACC	1	156936748	R			NA	NA	OR6K2	NM_001005279	1stExon					NA				NA
cg00119314	25759317	25759317	25759317	TCTAAAATAACTAAAAATTAAAAACATAAACCACCACCAAAACTATACAC	3.97e-05	NA		II			AACAGTCTACTCTCCCGGCCAAGCCAATTGCCCCTGGGATTTTCTGCTCCTCCAAGATCC[CG]TGCATAGCCCTGGTGGTGGCTCATGCCCTTAATCCTTAGTTACTCTAGATGCTGAGGCAG	37	17	48555610	CTAGAGTAACTAAGGATTAAGGGCATGAGCCACCACCAGGGCTATGCACG	17	45910609	F			NA	NA	RSAD1	NM_018346	TSS1500	chr17:48556004-48556509	N_Shore			NA		17:48555358-48557279	Promoter_Associated	NA
cg00119670	59646486	59646486	59646486	CTAAAATAATTATTACTATTTCTCTAAATTAATATTACCTTCAAACTACC	0.00407492	NA		II			TTTTCCCTGTTCTGGAATAGTTATTACTATTTCTCTGAATTAGTGTTGCCTTCAAGCTAC[CG]TATAGACTCCTTCCCCAGTCCTGAGATTCTCCACTATACAACTGAGAGTGATTTTCTCTG	37	6	127795207	CGGTAGCTTGAAGGCAACACTAATTCAGAGAAATAGTAATAACTATTCCA	6	127836900	R			NA	NA	C6orf174	NM_001012279	Body	chr6:127796286-127797356	N_Shore			NA				NA
cg00119811	44653310	44653310	44653310	TTACTCTACTCTACACAACATAATTTCCRAATAATTATAACTACTCTATC	0.0140207	NA		II			ACACGTGCATGGGGCTCCCTGGAGGCTGAGGGAGTGTGGTTGGTATGCTGTGCCAACACA[CG]ACAGAGCAGTTACAACCATTCGGAAATCATGCTGTGTAGAGCAGAGCAAGGAGGAAGCAC	37	5	73092353	CGACAGAGCAGTTACAACCATTCGGAAATCATGCTGTGTAGAGCAGAGCA	5	73128109	F			NA	NA	RGNEF	NM_001080479	Body					TRUE				NA
cg00119896	32660499	32660499	32660499	CTAATACAAATAAACTAAACCCTAAAACTCRCCTTAATCTCCCCATCTCC	9.05e-05	NA		II			GTGGGGGTGGGAGTGGGGACAGGGCCGGGGGTGGGGGTGCTTGGGGACAGATCAGGGAGC[CG]GAGATGGGGAGACCAAGGCGAGTCTCAGGGCCCAGCCCACCTGCATCAGTCGGGGTGAGG	37	7	3083721	TGATGCAGGTGGGCTGGGCCCTGAGACTCGCCTTGGTCTCCCCATCTCCG	7	3050247	F			NA	NA	CARD11	NM_032415	TSS200					TRUE		7:3082470-3084096	Promoter_Associated	TRUE
cg00120254	18676310	18676310	18676310	CRACACCTAACTCTAACTACCTCTTAATTCAAAACACTAAAAATAAACCC	0.00103893	NA		II			GCAGATGGACGACGCAGCGTCCCACTGGTGCTCTTCCTGGGGTAGGAAGCGTCATGGACC[CG]GGCTCATCTTCAGTGTCCTGAACCAAGAGGCAGCTAGAGCCAGGTGTCGGCCCTCAAAGG	37	6	166868904	CGGGCTCATCTTCAGTGTCCTGAACCAAGAGGCAGCTAGAGCCAGGTGTC	6	166788894	F			NA	NA	RPS6KA2	NM_021135;NM_001006932	Body;Body	chr6:166868758-166869230	Island			NA	6:166788669-166789205			NA
cg00120505	59601339	59601339	59601339	CAATAAACACAAAAAAAACACTTAACAAATCTAACAACCAAAATAAAAAC	0.00558935	NA		II			CCTCAGCCTCCCAAAGTGCTGGGATTACAGGCATGAGCCGTGGCGCCCGGCCTTGCTCAG[CG]TTTTTATCTTGGTTGTTAGATTTGTTAAGTGCTTTTTCTGTGTTTATTGAAATAATCATG	37	9	5655609	AATAAACACAGAAAAAGCACTTAACAAATCTAACAACCAAGATAAAAACG	9	5645609	F			NA	NA	KIAA1432	NM_020829;NM_001135920	TSS1500;5'UTR					NA				NA
cg00120948	52718475	52718475	52718475	AAAATTACAAACTAATCTTAAAAAACTAAATCTAACCCTTCACTAAATCC	0.0229645	NA		II			AAATCACCTGCCCACCGGGCAGAGGGTCCCTCCCACTCCCTGTGTTTGAGACCCGCCAGG[CG]GATTCAGTGAAGGGCCAGACTTAGCCTTTTAAGACCAGTCTGCAACCTCCTACTCCAGTA	37	1	8484417	AGGTTGCAGACTGGTCTTAAAAGGCTAAGTCTGGCCCTTCACTGAATCCG	1	8407004	F			NA	NA	RERE	NM_012102;NM_001042682;NM_001042681	Body;TSS1500;Body	chr1:8483389-8484339	S_Shore			NA		1:8484230-8484456	Promoter_Associated	TRUE
cg00121209	22787440	22787440	22787440	CCCTAAAAACRAATTCTCRCRCATAAAAACCACAACTCCCAAAATACTCC	0.0162721	NA		II			CGCACGCGCAGCCCTGGGAGCGGGTTCTCGCGCATAGGGACCACAACTCCCAGGGTGCTC[CG]CGTCCTCGCCGCTGTCGCCGCCGCGGAGACAAAGATGGCTGCGAGTAAGTGCAGGTTCCG	37	19	54606151	CCTGGGAGCGGGTTCTCGCGCATAGGGACCACAACTCCCAGGGTGCTCCG	19	59297963	R			NA	NA	NDUFA3	NM_004542	TSS200	chr19:54605985-54606590	Island	high-CpG:59297953-59298004		NA	19:59297663-59298432	19:54605706-54606744	Promoter_Associated	NA
cg00121366	64657405	64657405	64657405	AAAAATAAATATAAAATATAACCCTAAAAATAAACACCATCCACCTAAAC	0.00385844	NA		II			CCGCCGTCCAGGTGGATGGTGCCCACTCCCAGGGTCACACCTCACGCCCACCCCTCCCGC[CG]CCCAGGTGGATGGTGCCCACTCCCAGGGTCACACCTCACACCCACCCCTCCCGCCCACCC	37	20	62282182	GGGGTGGGTGTGAGGTGTGACCCTGGGAGTGGGCACCATCCACCTGGGCG	20	61752626	F			NA	NA	STMN3	NM_015894	Body	chr20:62283516-62284835	N_Shore			NA				NA
cg00121551	40602477	40602477	40602477	AACCCTATACTACAACCTAAAAAACCTAACCCCACCCAAATAAAAAAACC	0.00794192	NA		II			CCTTCATACTCAGCCCTGTGCTGCAGCCTGAAGGGCCTGGCCCCACCCAGGTGGGGAAGC[CG]GCGGCCCCTACGCTGACGGTGAACATCGTGGGCACTCTGCCTGTCCTGTCGCCGGGCCTG	37	20	57766397	GCCCTGTGCTGCAGCCTGAAGGGCCTGGCCCCACCCAGGTGGGGAAGCCG	20	57199792	R			NA	NA	ZNF831	NM_178457	1stExon	chr20:57766396-57767896	Island			NA	20:57199792-57201247			NA
cg00121562	11602424	11602424	11602424	AAATTCCAAACCAATATTCTTTCCACTAAAAACCTTCTCTACCCAATCAC	0.00502356	NA		II			TCAGGCCTGTTAAGTTCCAGACCAGTGTTCTTTCCACTAAAGACCTTCTCTGCCCAGTCA[CG]GCCAATCACACCCCGTGCCCAAACACAACCCTACAGCGCCATCGCCCATCACGGATGCCA	37	3	196014011	AGTTCCAGACCAGTGTTCTTTCCACTAAAGACCTTCTCTGCCCAGTCACG	3	197498408	R			NA	NA	PCYT1A	NM_005017	5'UTR	chr3:196014248-196015104	N_Shore			NA		3:196013772-196015326	Promoter_Associated	NA
cg00122347	61659389	61659389	61659389	AAATAACTAACTTTAATCAATCTATAAAAAAATAAACATCTTTAAAAACC	0.0033817	NA		II			TGCTTCAGCTGTGCTTGAAGTGGCATGCCTCCTCTGCTGCAGGGCTCCCCCACCCCCACA[CG]GCCTCTAAAGATGTTTATTTCCTTATAGACTGATTAAAGTCAGCCATTCTTTTTCCTCAA	37	10	104236741	CGGCCTCTAAAGATGTTTATTTCCTTATAGACTGATTAAAGTCAGCCATT	10	104226731	F			NA	NA	TMEM180	NM_024789	3'UTR					NA		10:104236693-104236848	Unclassified_Cell_type_specific	NA
cg00122628	29809403	29809403	29809403	AAACRACTTCTAACCAATAAACAAAAACRACAAACAACAAATACRTTACC	0.0219174	NA		II			GCTCCAGCACCAAACGGCTTCTGACCAATGAGCAGAGACGGCAAACAGCAAATGCGTTAC[CG]TGGCTTTCACGTGTCATGAAGGTGATGCTGTAACCTGAGCCTCAGAGCTCATTTTATTTG	37	8	134202359	CGGTAACGCATTTGCTGTTTGCCGTCTCTGCTCATTGGTCAGAAGCCGTT	8	134271541	R			NA	NA	WISP1	NM_080838;NM_003882	TSS1500;TSS1500					NA				NA
cg00122779	50730351	50730351	50730351	TCTTAAATTCAAATCAAAAAATAAACCCAATCTAACCCTAACTTAAAATC	0.0215789	NA		II			GGCCCCAGCTGTCTTGAATTCAGGTCAGAAGGTGGGCCCAGTCTGGCCCTAACTTAAGAT[CG]ATTTCTGATTATAATCATAATCAGATTTTGTGGCTTCCTTATGGTCCCTCAACCATGCCA	37	6	32033006	CGATCTTAAGTTAGGGCCAGACTGGGCCCACCTTCTGACCTGAATTCAAG	6	32140984	R			NA	NA	TNXB	NM_019105	Body					NA				NA
cg00123057	40690451	40690451	40690451	AACCCATTACTCCACTACAATAAACACCTTAAAACAAAATTTTAAATCAC	0.0199438	NA		II			TTATCACTGCAAACCCATTACTCCACTACAATAAACACCTTAGAACAGAGTTTTGAATCA[CG]TCTGTCTACCTGAAAGCTCAGGGGTGGAATGAGGCAAATACCCACAAAAACAAACACAAA	37	7	140153199	ACCCATTACTCCACTACAATAAACACCTTAGAACAGAGTTTTGAATCACG	7	139799668	R			NA	NA	MKRN1	NM_013446	3'UTR					NA				NA
cg00123317	73678370	73678370	73678370	TACCCAAAAATAAATACTATACACATTTACATATATCCTCTAATCTTTTC	0.000130896	NA		II			CATAGTTCTATTACCCAGAGATAAATACTGTACACATTTGCATGTGTCCTCTAGTCTTTT[CG]CTATAAGTAATCATTTGTTTTTTAAAATTGCACTTTAGGAGCTTTTTTTTTTTTTTTTTT	37	12	70005043	ACCCAGAGATAAATACTGTACACATTTGCATGTGTCCTCTAGTCTTTTCG	12	68291310	R			NA	NA	LRRC10	NM_201550	TSS200					NA				NA
cg00123666	34802430	34802430	34802430	CCTACTAATAACTTCCAACAACCATAAACTCCTCTATTCCRACCTTTCCC	0.0172238	NA		II			CTATGGGACCACCTGCTAGTGGCTTCCAGCAGCCATGGGCTCCTCTGTTCCGACCTTTCC[CG]TGCCCTGCAGTTTTCTAGGGCGCACTGAGGCTCGACCACGGAAGGTCCGTGCCACTCTCG	37	11	8284113	CGGGAAAGGTCGGAACAGAGGAGCCCATGGCTGCTGGAAGCCACTAGCAG	11	8240689	R			NA	NA	LMO1	NM_002315	Body	chr11:8284102-8285032	Island			TRUE				NA
cg00124009	54692445	54692445	54692445	ATAAATACAAAAAAATCTTATTACTATCATTATTATATATCATTACTCCC	6.61e-09	NA		II			TCCTCCAGGCCCACAGTTTCTTAAAGGTCTATTCATCAACATGTTAATAATAGATTCTTA[CG]GGAGTAATGATATATAATAATGACAGTAATAAGACCTCTTTGTACTTACACCCTGTGTTG	37	1	201439578	CGGGAGTAATGATATATAATAATGACAGTAATAAGACCTCTTTGTACTTA	1	199706201	F			NA	NA	PHLDA3	NM_012396	TSS1500	chr1:201437519-201438648	S_Shore			NA				NA
cg00124375	72696369	46763423	72696369	TTATAATAAAACTACTATATTTCATACCAATCCACCAATCCACCATTACA	0.000780399	46763423	TTATAATAAAACTACTATATTTCGTACCGATCCGCCGATCCGCCGTTACG	I	C	Grn	CACCCAGATCTGGCCGGCCCTGGCGACGGGGCTGCAAACGCTTCGTAGACCTCAGAACAG[CG]CAACGGCGGACCGGCGGACCGGCACGAAACATAGCAGCCCCACCACAAACATTTCCCTTC	37	6	31698218	TTGTGGTGGGGCTGCTATGTTTCGTGCCGGTCCGCCGGTCCGCCGTTGCG	6	31806197	F			NA	NA	DDAH2	NM_013974	TSS200	chr6:31695894-31698245	Island	high-CpG:31805554-31806443		NA	6:31805255-31806224	6:31696696-31698363	Promoter_Associated	NA
cg00124695	70647471	16733303	70647471	AAAAACCAACCACATATAAATAAATCCAAATATACATAAATATAAATACA	0.0034165	16733303	GAAAACCAACCGCGTATAAATAAATCCGAATATACGTAAATATAAATACG	I	T	Red	GGTAGGGGGCGCGGGGGCCAGCCGCGTGTGAGTGGGTCCGAGTGTGCGTGAGTGTGAGTG[CG]TGTGTGTGTGTCCACGGCGCGGGCCGGAGCACTCACCATCTCGCCGGGGGAGCGAGGCCA	37	16	51185039	CGCACTCACACTCACGCACACTCGGACCCACTCACACGCGGCTGGCCCCC	16	49742540	R			NA	NA	SALL1	NM_001127892;NM_002968	TSS1500;Body	chr16:51183699-51188763	Island			NA	16:49742460-49742649			TRUE
cg00126034	50684321	50684321	50684321	RTAATTAACAAACTAAACTACAAACTCATCTCTTACCTTAAACCRCRAAC	0.00252481	NA		II			CCCCTCCCGAGCCCAGCGCGGAGCAGCCGGGTTTGAGGATGTCAGCGAGCAGCCAATCAG[CG]CCCGCGGCCTAAGGTAAGAGATGAGTCTGTAGTTCAGCCTGTCAATCACGCGCCCCTCCC	37	17	44896162	CGCCCGCGGCCTAAGGTAAGAGATGAGTCTGTAGTTCAGCCTGTCAATCA	17	42251161	F			NA	TRUE	WNT3	NM_030753	TSS200	chr17:44895800-44897025	Island			TRUE	17:42250833-42252083			TRUE
cg00126261	67638391	67638391	67638391	CTAAAACTATTTCCCATTCTCCAAAAAAAATACAAACCCRAAATATACCC	0.0249399	NA		II			AACTGTTGGTTCTGGGGCTGTTTCCCATTCTCCAGAGAAAGTGCAGGCCCGGGGTGTGCC[CG]AGAAAAGTGATGAGCAGTTGACCTCCCCTTCTCAACTTGGTCTGGAGGCTTCATCATATT	37	6	100054008	CGGGCACACCCCGGGCCTGCACTTTCTCTGGAGAATGGGAAACAGCCCCA	6	100160729	R			NA	NA	PRDM13	NM_021620	TSS1500	chr6:100054686-100054988	N_Shore			NA	6:100160641-100160730			NA
cg00126536	24625470	24625470	24625470	TTCTCACTTTTTCTCTCTCCTAAAATACTAATAACTTACTAAACAAATAC	0.00371865	NA		II			ACCAATTATGATTCTCACTTTTTCTCTCTCCTAGAATGCTGGTGACTTACTGAACAGGTA[CG]AGCTGTCCCTTCTTCTTTCCCACATGTGCATATAAACCCACACAACACAGACATGCACAG	37	6	30115323	TCTCACTTTTTCTCTCTCCTAGAATGCTGGTGACTTACTGAACAGGTACG	6	30223302	R			NA	NA	TRIM40	NM_138700	Body					NA				NA
cg00126638	20682473	67695445	20682473	TTTTAAAAAAACCAATCAACATCACCACAATCCTAATTCTAAAATCCTCA	0.000179649	67695445	TTTTAAAAAAACCAATCAACGTCGCCGCGATCCTAATTCTAAAATCCTCG	I	C	Grn	TAGGTGACAGGTTTTTAGAGAAGCCAATCAGCGTCGCCGCGGTCCTGGTTCTAAAGTCCT[CG]CTCACCCACCCGGACTCATTCTCCCCAGACGCCAAGGATGGTGGTCATGGCGCCCCGAAC	37	6	29795583	TTTTAGAGAAGCCAATCAGCGTCGCCGCGGTCCTGGTTCTAAAGTCCTCG	6	29903562	R			NA	NA	HLA-G	NM_002127	5'UTR	chr6:29795553-29796594	Island			NA	6:29903476-29904474			TRUE
cg00127150	27735464	27735464	27735464	TAATCCTCATCAAAAAAACTTCTCTTTTCTTACCTCAAATTTATTACAAC	0.0155612	NA		II			AAATACAACTTTGGTCCTCATCAGGGAGACTTCTCTTTTCTTACCTCAGGTTTATTACAA[CG]CAACTTTTAAGAACTTGAGCTATTCCAGGCAGAAGGTCACATCCTTGAGGTAACCAGAGA	37	22	22862144	GGTCCTCATCAGGGAGACTTCTCTTTTCTTACCTCAGGTTTATTACAACG	22	21192144	R			NA	NA	ZNF280B	NM_080764	5'UTR	chr22:22862623-22863220	N_Shore			NA				NA
cg00127167	64758363	67644406	64758363	ACAACCCAAAAATAAAAACCCACAAAACCACTACAATAACTAAAATCCCA	0.00365464	67644406	ACGACCCGAAAATAAAAACCCGCGAAACCACTACAATAACTAAAATCCCG	I	C	Grn	GGCGGCGCCGGTGCGGCCCGGAGGTGGGAGCCCGCGGAGCCACTGCAGTAGCTGGAGTCC[CG]CCGAGTCCCCAGCCCCAAGGCAGGGCAGGAGCGCGCACCGGCCGGAGGTCCATGCTGAGC	37	5	5140029	GCGGCCCGGAGGTGGGAGCCCGCGGAGCCACTGCAGTAGCTGGAGTCCCG	5	5193029	R			NA	NA	ADAMTS16	NM_139056	TSS1500	chr5:5139441-5140941	Island			NA	5:5192180-5193936	5:5139972-5140079	Unclassified_Cell_type_specific	NA
cg00127198	48699434	48699434	48699434	AAAATAAACCATTCACTTTCTACTAAAACTATTCTTATTCTAATCTTAAC	6.92e-09	NA		II			GCATACCCCACGAAGCTGCAATGCTAAAGGCGATAATGGGTGGGGGTGGAGGAGGCGGGG[CG]CCAAGACCAGAATAAGAATAGTCCCAGCAGAAAGTGAATGGCCCATTTCCCTGCAGCTTC	37	7	555518	AAATGGGCCATTCACTTTCTGCTGGGACTATTCTTATTCTGGTCTTGGCG	7	522044	F			NA	NA	PDGFA	NM_002607;NM_033023	Body;Body	chr7:556611-562845	N_Shore			NA				NA
cg00127408	39678496	39678496	39678496	ATATCACCCCTTCCAAAAAAACTCTAAAAAATTCACTCAAACCTTACTAC	7.03e-05	NA		II			AAAGAAAACACATGTCACCCCTTCCAAAGGGGCTCTGGGGAATTCACTCAGGCCTTGCTA[CG]GCTCCTGCCAGCCCAGTGAGCGACGGGCACAGCCCCGGAATGAGGCTCCCCCTCCTCCAT	37	9	139420471	TGTCACCCCTTCCAAAGGGGCTCTGGGGAATTCACTCAGGCCTTGCTACG	9	138540292	R			NA	NA	NOTCH1	NM_017617	Body	chr9:139421103-139421509	N_Shore			NA	9:138539685-138541330	9:139420422-139420615	Unclassified_Cell_type_specific	NA
cg00127424	44629448	62804491	44629448	TACATAAACTTATAACACACCCACAAAAAAACCAAAATAAACTAAAATCA	0.0316123	62804491	TACGTAAACTTATAACGCGCCCGCGAAAAAACCGAAATAAACTAAAATCG	I	A	Red	CCAGGCCTCGCGGAACCCCCCGCCCCGGTCTCGTCCCCAGGCCTGCGCACCGCCCCGACC[CG]ACCCCAGCCTACCCCGGCCTCTCCGCGGGCGCGCCACAAGCCTACGCAGCCCTGGCGACT	37	17	76836804	TGCGTAGGCTTGTGGCGCGCCCGCGGAGAGGCCGGGGTAGGCTGGGGTCG	17	74348399	F			NA	NA	USP36	NM_025090	5'UTR	chr17:76836060-76837438	Island	high-CpG:74348203-74348610		NA	17:74347449-74349071	17:76836796-76837642	Promoter_Associated	NA
cg00127894	27666304	59708415	27666304	AACACAACAAAAATAATCCTAACAAATCCACTTCCTCCACACAAAAAACA	0.0308953	59708415	GACACAACAAAAATAATCCTAACAAATCCGCTTCCTCCGCACGAAAAACG	I	C	Grn	CGTGGCCCCCTCCCCGCCTCCGCCGCGCCCCCTCCGCACTCGCACGGCCCCACCCGCAGG[CG]CCCCCCGTGCGGAGGAAGCGGATCTGCCAGGATCATTTTTGTTGTGTCGGAGGATGAGGT	37	13	113623639	CGCCCCCCGTGCGGAGGAAGCGGATCTGCCAGGATCATTTTTGTTGTGTC	13	112671640	F			NA	NA	MCF2L	NM_001112732	Body	chr13:113622737-113623660	Island	high-CpG:112671497-112671696		TRUE	13:112670739-112672099	13:113623639-113624265	Unclassified	NA
cg00128171	57796499	73630326	57796499	AATAAATCCAACAATACTAAATCAAAACCAAAAAAAAACAACCAAAAACA	0.00156477	73630326	AATAAATCCAACAATACTAAATCAAAACCAAAAAAAAACAACCGAAAACG	I	C	Grn	CACCCCCGCGCGCCCGGTGCGCACCCGTTTCGGCGGGTGCACGAGTCCAGAGCATGTGCG[CG]CTTCCGGCTGCCCCCTCCTGGCTTTGACCCAGCACTGCTGGACCCATCTAGTCCGTTCCT	37	15	85114354	GATGGGTCCAGCAGTGCTGGGTCAAAGCCAGGAGGGGGCAGCCGGAAGCG	15	82915358	F			NA	NA	UBE2QP1	NR_003661	TSS1500	chr15:85113435-85114361	Island			NA	15:82914440-82915359	15:85113287-85114695	Promoter_Associated	TRUE
cg00128386	52712456	62647324	52712456	CCTCTATACACAAAAAAAAACACTAATAACAACCCAATACAAAAAACACA	1.78e-13	62647324	CCTCTATACACAAAAAAAAACACTAATAACAACCCGATACGAAAAACACG	I	C	Grn	GGACCCGCTGCGCCTCTGTGCACAGGGAGAGGCACTGATGGCAGCCCGGTGCGGGGGACA[CG]CAGAGGCCAGGCCCGCCTTGGGGGCAGCGTGGCTGGCGGTGCGGAGCAGAGAGCAGCTGG	37	16	85665539	CCTCTGTGCACAGGGAGAGGCACTGATGGCAGCCCGGTGCGGGGGACACG	16	84223040	R			NA	NA	KIAA0182	NM_001134473;NM_014615	5'UTR;Body	chr16:85666621-85667149	N_Shore			NA	16:84223026-84223084			NA
cg00128425	10810410	24716413	10810410	AACCATAACAACAACTTCCAAAAAACCAAACTCCTACACAAAATAAAACA	0.00141598	24716413	GACCGTAACAACGACTTCCAAAAAACCAAACTCCTACACGAAATAAAACG	I	A	Red	GTAAAGTGTGACGGCCGTGGCAGCGGCTTCCAAGGGACCAAGCTCCTGCACGAAGTGAGG[CG]GCGGCTGGGCTTGCTGGAGGAGAAGGACCAGATGGAGGCCGTGCGGTGAGCACCCGCCCA	37	7	154667764	GGCCGTGGCAGCGGCTTCCAAGGGACCAAGCTCCTGCACGAAGTGAGGCG	7	154298697	R			NA	NA	DPP6	NM_001936;NM_130797;NM_001039350	Body;Body;Body					NA	7:154298431-154298785			NA
cg00128702	23771432	38635455	23771432	TAATTCTTTCACTTAACATCACATCAAAAAAATTAACTTTCCTTCAACCA	0.000405746	38635455	TAATTCTTTCGCTTAACATCGCGTCAAAAAAATTAACTTTCCTTCAACCG	I	A	Red	TCACTCGACTGCTGATTCTTTCGCTTGGCATCGCGTCAGGGGAGTTAGCTTTCCTTCAGC[CG]GGTCTGGCTAGTTATTGGGCGCCGGGTAGATGCATATATATATATTTTTTTCTAACTATA	37	18	905156	TGATTCTTTCGCTTGGCATCGCGTCAGGGGAGTTAGCTTTCCTTCAGCCG	18	895156	R			NA	NA	ADCYAP1	NM_001099733;NM_001117	5'UTR;TSS200	chr18:904578-909574	Island			NA	18:894523-895157			NA
cg00129232	13809303	65740484	13809303	TACTCCTAAACTATACCATACTACAACTCCAACACTAATAAATAATTACA	0.000757043	65740484	TACTCCTAAACTATACCGTACTACGACTCCGACACTAATAAATAATTACG	I	A	Red	GCTTCTCTGGACTGCTCCTAGGCTATGCCGTGCTGCGGCTCCGGCACTGGTGGGTGATTG[CG]GTAAGATGCCACTTTCCTGGCAGCTTCTGGGCCCTGGCAGGGCTGGTGGAAGGGATGGGA	37	17	37814104	CGCAATCACCCACCAGTGCCGGAGCCGCAGCACGGCATAGCCTAGGAGCA	17	35067630	R			NA	NA	STARD3	NM_001165937;NM_006804;NM_001165938	Body;Body;Body					NA				NA
cg00129563	64609450	12640444	64609450	ATCCTTATATTACAAAAAAAAACCCATCTCTTACCCAATCTACTATCTCA	0.00953985	12640444	ATCCTTATATTACGAAAAAAAACCCGTCTCTTACCCAATCTACTATCTCG	I	A	Red	TCCTGTGTAATTGTAAAAAGAGGAAAGCTGAATACCCAGACGACCAGTATAGAATCTCTT[CG]AGACAGCAGATTGGGCAAGAGACGGGCTTTTTTTCGCAATACAAGGATAAACACATCCTG	37	5	122434853	CGAGACAGCAGATTGGGCAAGAGACGGGCTTTTTTTCGCAATACAAGGAT	5	122462752	F			NA	NA	PRDM6	NM_001136239	Body	chr5:122433878-122435551	Island		RDMR	TRUE				TRUE
cg00129651	74632320	56643312	74632320	CAACCACACTCACAAAACCACAATCTTAATAAACTTCTTAAACAACTACA	1.23e-07	56643312	CGACCGCACTCACAAAACCGCGATCTTAATAAACTTCTTAAACAACTACG	I	C	Grn	GCGAGGTCACGCACTGGGTGGCCACCGAAGTGCTGCTCTGCGAGGCCCCGGGCAAGCGCG[CG]CAGCTGCTCAAGAAGTTCATCAAGATCGCGGCCCTGTGAGTGCGGCCGTCGGCGGGATGG	37	17	38347710	CGGCCGCACTCACAGGGCCGCGATCTTGATGAACTTCTTGAGCAGCTGCG	17	35601236	F			NA	NA	RAPGEFL1	NM_016339	Body	chr17:38347533-38347765	Island			TRUE	17:35600985-35601551	17:38346579-38348542	Unclassified	NA
cg00129981	27617459	71680320	27617459	CTTAAAATCTAAACCCAACATACTTATTCCTCCTACACCAACCAAACACA	0.0316723	71680320	CTTAAAATCTAAACCCAACATACTTATTCCTCCTACACCAACCAAACGCG	I	A	Red	GAACCCAGACCACTTGGAATCTGGGCCCAACATGCTTATTCCTCCTGCACCAGCCAGGCG[CG]GTGGCTTACACCTATAATTCTAGCACTTTGGGAGGCTGAGGCAGGCAAGTCACCTGAGGT	37	16	5108968	CGCGCCTGGCTGGTGCAGGAGGAATAAGCATGTTGGGCCCAGATTCCAAG	16	5048969	R			NA	NA	C16orf89	NM_001098514;NM_152459	Body;Body					TRUE				NA
cg00130039	36706505	36706505	36706505	ACATAATAACRAAAATCCRAAAACAAACCTCACCATACTACCTAAAAACC	0.000541047	NA		II			GTAGCTCACGTACATGGTGGCGAGGGTCCGGGAGCAGACCTCACCATGCTGCCTGGGGAC[CG]ACGCTGGAGGCTGCCGGGGGGCACGAAGGGAAAGGGGCGAGGGGACTCGAGGAGCGGCGG	37	13	28543189	CGGTCCCCAGGCAGCATGGTGAGGTCTGCTCCCGGACCCTCGCCACCATG	13	27441189	R			NA	NA	CDX2	NM_001265;NM_001265	5'UTR;1stExon	chr13:28542221-28543544	Island			NA	13:27438357-27441600	13:28542832-28543666	Unclassified_Cell_type_specific	NA
cg00130165	63622366	63622366	63622366	TAACATCTTACCTACTATCCCTCACAAACTATAACATCAACAACCTTATC	4.58e-05	NA		II			GTCCCTCCGTTTGGCATCTTGCCTGCTGTCCCTCACAGGCTGTGGCATCAACAACCTTGT[CG]TCACATCGCCGCGCATTCGCAGGCTCTGCTGGTCCGTGGCTAGTTTCTTAAACACCCATA	37	4	66536603	GGCATCTTGCCTGCTGTCCCTCACAGGCTGTGGCATCAACAACCTTGTCG	4	66219198	R			NA	NA	EPHA5	NM_004439;NM_182472	TSS1500;TSS1500	chr4:66536065-66536674	Island		DMR	NA	4:66218630-66219262			NA
cg00130799	69731364	69731364	69731364	CTAAACRTAAAACCTTCTTATCTCTCTACTCCAAATCTATAAAATATAAC	0.00693266	NA		II			CTGCACAGTGTCTGAGCGTAGGGCCTTCTTGTCTCTCTGCTCCAGGTCTGTGGGGTGTGG[CG]GGCAGTGCCTCGGTTGTCTCTGCGGCTCCTTAGGGCAGAACAGCTGCATGTGGCACTTGT	37	3	184100192	TGAGCGTAGGGCCTTCTTGTCTCTCTGCTCCAGGTCTGTGGGGTGTGGCG	3	185582886	R			NA	NA	CHRD	NM_003741	Body	chr3:184099095-184099582	S_Shore			NA				NA
cg00130817	62614320	62614320	62614320	TTACACTTTAAAAATATCCTAAATTACACCAAACTATAAAATAAATCTAC	0.0187079	NA		II			TCCTGTCACCTCTTGATTTTCAATTATGTGGAGTACCATTCTGTGACTTGATTATATTTG[CG]CAGACTCATTTTATAGTTTGGTGCAATTTAGGATACCCCCAAAGTGCAAACGAAGGGTCT	37	3	69928180	CGCAGACTCATTTTATAGTTTGGTGCAATTTAGGATACCCCCAAAGTGCA	3	70010870	F			NA	NA	MITF	NM_198177;NM_198178;NM_198159;NM_006722	Body;TSS200;Body;Body					NA				NA
cg00130947	21697460	21697460	21697460	TAAATTTTCACTACTATCATAAAAAATATATACAAATAATCTATATCCAC	0.000680634	NA		II			CCTTTTATATGTGGATTTTCACTACTATCATGAAGAATGTATACAAATAATCTGTGTCCA[CG]TTAGGAACCTATTTAGACATCACAGTCTCTCATAGTTAGTGACCTAAATTCAGCCCCACC	37	6	129677367	CGTGGACACAGATTATTTGTATACATTCTTCATGATAGTAGTGAAAATCC	6	129719060	R			NA	NA	LAMA2	NM_001079823;NM_000426	Body;Body					TRUE				NA
cg00131758	66713462	66713462	66713462	CTAAAACTATATTCCTCACACTCCTAAACTTATCTTAACTAACCTAAAAC	0.00205852	NA		II			GGCACTAGACGGGGACATCTTTCAGAGGCCCTTGCACTCTCTGCGTCCCTTGGCAGGGGG[CG]TTCTAGGCCAGTTAAGACAAGCCCAGGAGTGTGAGGAACACAGCCTCAGAAGGGCCAGCC	37	22	18275234	TGAGGCTGTGTTCCTCACACTCCTGGGCTTGTCTTAACTGGCCTAGAACG	22	16655234	F			NA	NA	MICAL3	NM_015241	Body	chr22:18275679-18275922	N_Shore			NA				NA
cg00131871	72674482	72674482	72674482	AACCRCATAAAAAATAACCACATACRAAACCRCAACATCACCAATAACTC	1.42e-09	NA		II			CCACCTTCGTGAACCGCATGAAGAGTAACCACATGCGGGGCCGCAGCATCACCAATGACT[CG]GCCGTGCTCTCACTCTTCCAGTCCATCAACGGCATGCACCCGCAGCTGCTGGAGCTGCTC	37	17	79662946	ACCGCATGAAGAGTAACCACATGCGGGGCCGCAGCATCACCAATGACTCG	17	77273351	R			NA	NA	HGS	NM_004712	Body	chr17:79662850-79663055	Island			NA	17:77273283-77273452			NA
cg00132135	18718328	18718328	18718328	AAATTTCTATAACCAAACCAAACTTAACTATTTCTATAAAACACTATCTC	0.0153078	NA		II			TCAGTGGGACTGGGTTTCTGTAGCCAAGCCAGACTTGACTGTTTCTGTAGAGCACTATCT[CG]GGCAGGCCATTCTGTGCCTTTTCCCTCTGTTCCATGACTTTGCTTTGTGTTGGCAACCAC	37	12	107155510	GGTTTCTGTAGCCAAGCCAGACTTGACTGTTTCTGTAGAGCACTATCTCG	12	105679640	R			NA	NA	RFX4	NM_213594;NM_032491	3'UTR;3'UTR					NA				NA
cg00132141	32782486	32782486	32782486	TCAAAACCCTAAAAATAATAACATCAAAACCATATATCACATCTAAAATC	0.00255718	NA		II			ATTCAATGTCTTCAGAACCCTAGAGATGATGGCATCAAGGCCATGTGTCACATCTGAGAT[CG]TATTTTTCTTCTTCTGAAATATTACCTGTCTCATCCCTTGTACCAAGCATCACACTCTCT	37	10	69456307	CGATCTCAGATGTGACACATGGCCTTGATGCCATCATCTCTAGGGTTCTG	10	69126313	R			NA	TRUE	CTNNA3	NM_013266	TSS1500					NA				NA
cg00132769	31656434	31656434	31656434	ACCAAAAAATCCTAAATTTCCAAAATCCRCRTCTAAAAATACAATACATC	0.00109486	NA		II			CAGTCAACTTTACCAAGAAGTCCTGGATTTCCAAGATCCGCGTCTGAAAGTGCAGTACAT[CG]TTTGTACCTGAAACTGCCGCCACATGCACTCCTCCACCGCTGAGAGTTGAATAGCTTTTC	37	5	17276333	CGATGTACTGCACTTTCAGACGCGGATCTTGGAAATCCAGGACTTCTTGG	5	17329333	R			NA	NA	BASP1	NM_006317	3'UTR	chr5:17275369-17275638	S_Shore			NA				NA
cg00133204	34610407	34610407	34610407	TCCCAAAAAACTAAACATTATAAACTCTTCAAAATAACAAACCTACTACC	0.00585074	NA		II			TGCAGTAAACTTCCCAGAAGGCTGAGCATTATAAACTCTTCAAAATGGCAAGCCTGCTAC[CG]AAAATACAGTCCCCACTTAGGAGGTTTTCTGGACACCAGAACCAGTCTCCATTGTCAGGA	37	13	98625733	CGGTAGCAGGCTTGCCATTTTGAAGAGTTTATAATGCTCAGCCTTCTGGG	13	97423734	R			NA	NA	IPO5	NM_002271	Body	chr13:98628059-98629306	N_Shelf			NA		13:98625687-98625759	Unclassified_Cell_type_specific	NA
cg00134295	53707315	53707315	53707315	CAAATTTTAACCTATTATACCTAACAAACTTCCCAATTACCTTTACCATC	0.000205196	NA		II			GACTTCAAAAACAAATTTTGACCTATTGTGCCTAACAAACTTCCCAATTGCCTTTACCAT[CG]ACTACACAGACTTCCTTACTGCCTTCCAAATATGATACTCCTCTGCAAACTTTAAGTCAT	37	12	9269178	AAATTTTGACCTATTGTGCCTAACAAACTTCCCAATTGCCTTTACCATCG	12	9160445	R			NA	NA	A2M	NM_000014	TSS1500					TRUE				NA
cg00134667	55784371	55784371	55784371	ACCTAACTTCCCAAAACTATTCRCTAACAAATTAATACTTTCCAAATACC	0.00172851	NA		II			TCAGAGCTGGTGCCTGACTTCCCAAGGCTGTTCGCTGACAAGTTGGTGCTTTCCAAATGC[CG]GCTTCTACCTTAAGGAAGGTCCCTCCTGGGTCCACAGTCAGCTGACGGATTGCCTCTCCC	37	16	1244321	CCTGACTTCCCAAGGCTGTTCGCTGACAAGTTGGTGCTTTCCAAATGCCG	16	1184322	R			NA	NA	CACNA1H	NM_021098;NM_001005407	Body;Body	chr16:1244669-1245067	N_Shore			TRUE		16:1244121-1245070	Unclassified	TRUE
cg00134776	52703486	17807498	52703486	CAAACATCACTAAAAATCTTACCCTTAACTAAATCTCTAAACATTCTACA	0.0137301	17807498	CGAACGTCGCTAAAAATCTTACCCTTAACTAAATCTCTAAACGTTCTACG	I	T	Red	CCCCTAGCACCACTAGGCGCTGCTCTAGTGTGCGCCTGGCGCCCTCCCCAGACCAGTCGA[CG]CAGAACGCCCAGAGACCCAGCCAAGGGCAAGACCCTTAGCGACGCCCGTCAGTCCTCTCC	37	3	139653573	CGCAGAACGCCCAGAGACCCAGCCAAGGGCAAGACCCTTAGCGACGCCCG	3	141136263	F			NA	NA	CLSTN2	NM_022131	TSS1500	chr3:139653430-139655115	Island		CDMR	NA	3:141136121-141137805	3:139653383-139653703	Unclassified_Cell_type_specific	TRUE
cg00134787	32654300	32654300	32654300	TCATCTACTACTTTTCAAAAACTATTAACTACTCTCATAAATAAAAAACC	9.41e-06	NA		II			GGGGACCTTAATCATCTACTACTTTTCAAAAACTATTAACTACTCTCATGAGTAGAAGAC[CG]TGAGAAAGAACTCACGTAGATCATCCAGGCTGCGTAGCGCTCTTTGAGGTTGTACAGCAC	37	17	10419499	CGGTCTTCTACTCATGAGAGTAGTTAATAGTTTTTGAAAAGTAGTAGATG	17	10360224	R			NA	TRUE	MYH1	NM_005963	Body					NA				NA
cg00135121	43789488	43789488	43789488	AACCAAATCAAACAAATATTTTAAACTCAAAAACTCTAAACTAATAACAC	7.64e-05	NA		II			GCATTTTGGGAGGCCAAGTCAGGCAGGTATTTTGAGCTCAGGAACTCTAGACTGGTGACA[CG]GTAAAATGTCTAGATCATCCTGTCTCTAAAAATACTTATATAAATTTAAAAAAAAAAAAA	37	2	96149768	GCCAAGTCAGGCAGGTATTTTGAGCTCAGGAACTCTAGACTGGTGACACG	2	95513495	R			NA	NA	TRIM43B	NM_001164464	5'UTR					NA				NA
cg00135852	14757387	14757387	14757387	ACATAATAACTACTAAACRTCCCAAAAATAAACATTCTCAAACATTATCC	0.0191589	NA		II			TGATCGAGTCGACATAATAGCTGCTAAGCGTCCCAGAAATGGACATTCTCAGACATTATC[CG]GGCGCTTGCAGGGGGAAGGGAAGCGCTCGCGCGGCGGCGCCCAAGCAGGGAGAGGTGGCA	37	17	46703646	CATAATAGCTGCTAAGCGTCCCAGAAATGGACATTCTCAGACATTATCCG	17	44058645	R			NA	NA	HOXB9	NM_024017;NM_024017	1stExon;5'UTR	chr17:46702280-46704166	Island			TRUE	17:44057280-44059114			NA
cg00135874	40751493	40751493	40751493	ATAACCAACAAAATACTACATATACTAACATCTTCTACCTACATCATCTC	6.29e-05	NA		II			ACACTCCTACAATGGCCAACAAGATGCTACATATACTGGCATCTTCTACCTACATCATCT[CG]ACATGATCTCCTCTCATGGAGGGCAGAGACTATGATGTTCAGAGCTGTATTACCAGCCCC	37	2	210493473	TGGCCAACAAGATGCTACATATACTGGCATCTTCTACCTACATCATCTCG	2	210201718	R			NA	NA	MAP2	NM_031847;NM_002374;NM_031845;NM_001039538	5'UTR;5'UTR;5'UTR;5'UTR					TRUE				NA
cg00135888	37677427	37677427	37677427	AAAACAAAATTCCAATTAAAAACTCTTCCTCTAAACTTCCCTCTAACCTC	6.58e-05	NA		II			GGAACAAACTCTGCCGGGGAGAGCGGGAGGGAACGTCTCCTGCTTCCTGAGGGGGTGGGA[CG]AGGCTAGAGGGAAGCCCAGAGGAAGAGCTCCCAACTGGAATTCTGTCCTCTATTCCTTAC	37	11	57407543	GGACAGAATTCCAGTTGGGAGCTCTTCCTCTGGGCTTCCCTCTAGCCTCG	11	57164119	F			NA	NA	MIR130A	NR_029673	TSS1500					NA				NA
cg00136077	44695344	44695344	44695344	AAACAACAAACAACCRCAACRAAATAAAACCATATTAAAAATTCCAAAAC	0.000998732	NA		II			ACACCACGTGGACCCACATGCGCCTTTGCGATCGTCACGCTGGGTGTCCACCATGGAAGC[CG]TCCTGGAACTTCTAACATGGCCCCATCTCGTTGCGGCTGTCTGCTGTTTCTGTCCCCATG	37	12	132832440	AACAGCAGACAGCCGCAACGAGATGGGGCCATGTTAGAAGTTCCAGGACG	12	131342513	F			NA	NA	GALNT9	NM_001122636	Body	chr12:132834178-132834430	N_Shore			NA	12:131342443-131342514			NA
cg00136400	22604484	22604484	22604484	TCCRCCTCCTTAATTCAAACATTCATCTTAACTCAACCTACTAAAAAACC	1.47e-06	NA		II			AACCCTGTCTCTACTAAAAATACAAAATTAGCCAGGTGTGGTGGCGCATGCCTGTAATCT[CG]GCTTCTCAGCAGGCTGAGTCAAGATGAATGCTTGAATCAAGGAGGCGGAGGTTGCAGTGA	37	8	144000430	CGGCTTCTCAGCAGGCTGAGTCAAGATGAATGCTTGAATCAAGGAGGCGG	8	143997432	F			NA	NA	CYP11B2	NM_000498	TSS1500					NA				NA
cg00136477	67806337	67806337	67806337	AAAACCTCACCATAAATAAATAATAAAACCTTTTCTTCAACCCAAACCCC	0.00100674	NA		II			GTGGTGCCAGGGGCAGCTTGGTGTGTGAGGGGAAGGAGGGTTCCCACTCCTGCTGGGCCC[CG]GGGCCTGGGCTGAAGAAAAGGCCCCACCATCCATCCATGGTGAGGCTCCTGGGGGAGGAA	37	1	22970339	GAGCCTCACCATGGATGGATGGTGGGGCCTTTTCTTCAGCCCAGGCCCCG	1	22842926	F			NA	TRUE	C1QC	NM_172369;NM_001114101	5'UTR;5'UTR	chr1:22974050-22974303	N_Shelf			NA				NA
cg00137629	18642454	18642454	18642454	CRCCAATCCTAACTAATATCATTAAAACTAAAAAAAACTAACATATCCAC	0.00211778	NA		II			AATGCCGCAGACGCCAGTCCTGGCTGATGTCATTGAAGCTGGAGGGAACTGGCATGTCCA[CG]GTGGGGCCTGACTGTGGAGAGAAGAGCCGGGCTCAGCTCCTAGGCCCCCAAAAGGGTCCA	37	7	65445384	GCCAGTCCTGGCTGATGTCATTGAAGCTGGAGGGAACTGGCATGTCCACG	7	65082819	R			NA	NA	GUSB	NM_000181	Body	chr7:65446771-65447340	N_Shore			NA				NA
cg00138041	74720453	74720453	74720453	CATCAACTACTACACTAAAAAAACAAATCAACRCCTCTAAATAACTTAAC	1.43e-06	NA		II			CAAGTCATTAGCATCAGCTGCTGCACTAAAGGGGCAAGTCAGCGCCTCTAAGTGGCTTAG[CG]CACAAACGAGGCTCCCGAGACGGCCTCGGCAACTCCATCCCCTCCTCCACCACCCGCTGG	37	4	81117665	ATCAGCTGCTGCACTAAAGGGGCAAGTCAGCGCCTCTAAGTGGCTTAGCG	4	81336689	R			NA	NA	PRDM8	NM_001099403;NM_020226	TSS1500;5'UTR	chr4:81118137-81118603	N_Shore		RDMR	TRUE	4:81336689-81336878	4:81117576-81117932	Unclassified_Cell_type_specific	NA
cg00138101	24695495	24695495	24695495	RAACTAAAATCCTCRCTACTACCRATCTCCTCRCTACTACTCTTATAATC	1.33e-06	NA		II			GGCGCCGCCGCCGCGCTACCCTGGCAGCCTGGACGGGCCCGGCGCGGGCGGCGACGGCGA[CG]ACTACAAGAGCAGCAGCGAGGAGACCGGTAGCAGCGAGGACCCCAGCCCGCCTGGCGGCC	37	17	1961109	GGCTGGGGTCCTCGCTGCTACCGGTCTCCTCGCTGCTGCTCTTGTAGTCG	17	1907859	F			NA	NA	HIC1	NM_001098202;NM_006497	Body;Body	chr17:1952919-1962328	Island		DMR	NA	17:1903519-1909615			NA
cg00139092	31780416	31780416	31780416	CAACATAAAAAAATCTTATCTCTACACAAAAAATTTAAAATCAACTAATC	2.95e-05	NA		II			AACTCCTGGGCAATCCTCCCACCTCAGCCTCCGGAGTAGATGGAACTACAAGAGGCACCA[CG]ACCAGCTGATTTTAAATTTTTTGTGTAGAGACAAGATCTCTCTATGTTGCCCAGGCTGGT	37	7	128530129	AACATAGAGAGATCTTGTCTCTACACAAAAAATTTAAAATCAGCTGGTCG	7	128317365	F			NA	NA	KCP	NM_001135914;NM_199349	Body;3'UTR	chr7:128530629-128531356	N_Shore			NA				NA
cg00139517	61663486	61663486	61663486	CATTATACTATACTATTTCCACRCCTCCCTTACAACATATCTTCCTTTAC	0.00839668	NA		II			TCCTGAGCTATCATTATACTGTACTGTTTCCACGCCTCCCTTACAACATGTCTTCCTTTG[CG]GGAACAGAACTGGAACACACTGGAAACTTATACATATCTGACCCATATTTTTGGAGCTAT	37	8	50904638	ATTATACTGTACTGTTTCCACGCCTCCCTTACAACATGTCTTCCTTTGCG	8	51067191	R			TRUE	NA	SNTG1	NM_018967	5'UTR					NA				NA
cg00140112	74607352	74607352	74607352	ATACACTCRATCCAAAAACTCTTCACCAAATCRCACTCCCTAAAAAAACC	0.0217246	NA		II			ATAGCGCGCCGCCTGCGCCTCGTCAGGGCTGGCCTTGCCCCCGTTGACGCTGCCCTTGGA[CG]GCCCCTCCAGGGAGTGCGACTTGGTGAAGAGCTTCTGGACCGAGTGCACCAGGTGGCGGA	37	18	3879595	CGGCCCCTCCAGGGAGTGCGACTTGGTGAAGAGCTTCTGGACCGAGTGCA	18	3869595	F			NA	NA	DLGAP1	NM_004746	1stExon	chr18:3879202-3880087	Island			NA	18:3869131-3870087			NA
cg00140494	41751494	41751494	41751494	CRCAAATATCACTATAACRCAAACAAACCRTAAACAATAATAAAACRTCC	1.45e-05	NA		II			AGTAAGGCGTCCGCAAGTGTCACTGTAACGCAGGCAAGCCGTGAACAGTAGTAAGGCGTC[CG]CGGGTGTGTCGCTGTGACGCGGGTAAGCCGTGAACAGTAGTAAGGCATTCGCAAGTGTGT	37	18	77256015	GCAAGTGTCACTGTAACGCAGGCAAGCCGTGAACAGTAGTAAGGCGTCCG	18	75357003	R			NA	NA	NFATC1	NM_006162;NM_172388;NM_172389;NM_172387	Body;Body;Body;Body	chr18:77255680-77256046	Island			NA	18:75356614-75357034			NA
cg00140786	36784308	36784308	36784308	AAAAAAACCACTTTCTCTTTAAAATACTAAAATAAAAATCAACCCATTTC	0.00115919	NA		II			GTCTCAAAAAAAAAAAGACCACTTTCTCTTTGGGGTGCTGAAATGAGGATCAGCCCATTT[CG]CCGGCAAGGAGATGGAAGCAGGGAGAGGTCCCTTGACCTGTGTGACTGGCAGAGCTGGTC	37	7	2740918	AAAAGACCACTTTCTCTTTGGGGTGCTGAAATGAGGATCAGCCCATTTCG	7	2707444	R			NA	NA	AMZ1	NM_133463	Body	chr7:2742273-2742546	N_Shore			NA				NA
cg00140910	16712406	16712406	16712406	TCAAAATCCTCTAACRACCCCAATCAAAAAATTTCAATTTAAAACCTAAC	0.0291112	NA		II			GCCGCGGGACCCGTCCCTCTTCAGTCCCAGCCGCCGGCAGCCGCGCCTGCCTCCTCCCTC[CG]CTAGGTTTCAAATTGAAATTCCCTGACTGGGGCCGTCAGAGGACTCTGAGGGCCGGCCCC	37	6	131384370	CAGAGTCCTCTGACGGCCCCAGTCAGGGAATTTCAATTTGAAACCTAGCG	6	131426063	F			NA	NA	EPB41L2	NM_001135555;NM_001135554;NM_001135554;NM_001431;NM_001431;NM_001135555	1stExon;1stExon;5'UTR;5'UTR;1stExon;5'UTR	chr6:131383431-131384371	Island	high-CpG:131426041-131426080		NA	6:131425125-131426333	6:131383261-131384942	Unclassified	NA
cg00141548	54714487	54714487	54714487	TAACCCCACTTAATCCCCATAAACTTACCAAAAAACTTCACACTATCCAC	0.000226825	NA		II			GAGTCTAGATCTAACCCCACTTGGTCCCCATGGACTTGCCAGAGGACTTCACACTATCCA[CG]CCTCAAGAAGCCCTTCTCCCGTGAAGACCAAGTTCAGGAAATCTGAAAGCCTGACACTTG	37	7	87229968	AACCCCACTTGGTCCCCATGGACTTGCCAGAGGACTTCACACTATCCACG	7	87067904	R			NA	NA	ABCB1	NM_000927	5'UTR	chr7:87230059-87230260	N_Shore			TRUE	7:87067439-87068320	7:87229456-87230460	Unclassified_Cell_type_specific	NA
cg00141925	63809330	63809330	63809330	CAAAAAATTATTCTTTCCTTACCAAATATTACCCTAATTCCTACCATATC	0.00236917	NA		II			AAAAAGAAGCTCAAAAAATTGTTCTTTCCTTACCAGGTGTTGCCCTGGTTCCTGCCATAT[CG]CTCCCCAAAGGTGCTGTAGGAGCCATCATAGTGTTTGTAGTTCAACTGTCTCTGGTAACC	37	12	9231867	AAAAAATTGTTCTTTCCTTACCAGGTGTTGCCCTGGTTCCTGCCATATCG	12	9123134	R			NA	NA	A2M	NM_000014	Body			low-CpG:9123126-9123141		NA				NA
cg00142036	40768428	40768428	40768428	ATCRCTCATATAAATCTCACRAAACCCRAATTTAAACAATAATCCAAACC	0.0177022	NA		II			TTGGGACGCACATCGCTCATATAAATCTCACGAAGCCCGAGTTTGGGCAGTAATCCAAAC[CG]TCTTCACAAAAACACGGTTTGGGATGAGCAATGATTTCGGTGGGAAACGTAACAACTGAG	37	10	13388442	CGGTTTGGATTACTGCCCAAACTCGGGCTTCGTGAGATTTATATGAGCGA	10	13428448	R			NA	NA	SEPHS1	NM_012247	5'UTR					NA	10:13428448-13428574			NA
cg00142239	16715502	16715502	16715502	CCRAATTTACTTTTATCTAAACTAAACCAACAAAAAATACAAACAAAAAC	0.00150441	NA		II			GTGGCAGCGTGAGCTCCCCCGTGCCCAGGAACTGGGTGGCCGGGCCTCCTTCTGCCCCAT[CG]CCTCTGCCTGCACCTTCTGCTGGTCCAGCTCAGACAAAAGTAAACCCGGACCTCACCCCA	37	8	1508017	CGCCTCTGCCTGCACCTTCTGCTGGTCCAGCTCAGACAAAAGTAAACCCG	8	1495424	F			NA	NA	DLGAP2	NM_004745	Body	chr8:1509850-1511735	N_Shore		RDMR	NA				NA
cg00142670	38602323	64652310	38602323	TAACAAAAAACAAACAAAAAAATCCCCATAAACCAAAATCACCACACACA	0.0210566	64652310	TAACGAAAAACAAACGAAAAAATCCCCATAAACCGAAATCACCACGCACG	I	C	Grn	GCCCCAGGGCCCTTTCATCCGCGCCGCGCCTCGCTCCCGCCCCCGTGACTCGAGGCGCAG[CG]TGCGTGGTGATCCCGGCCCATGGGGACTTCCCCGCTTGCTCCTCGCCAAGATGGCGGCCT	37	6	43478496	TGGCGAGGAGCAAGCGGGGAAGTCCCCATGGGCCGGGATCACCACGCACG	6	43586474	F			NA	NA	C6orf154	NM_001012974	TSS200	chr6:43477221-43478553	Island			NA	6:43585221-43586479			NA
cg00143249	51668363	51668363	51668363	ACCCCAAAACTAAACTAAAACTCCRTAAAAACTAAAACTATATCCCCAAC	0.00181253	NA		II			CTCAGCAGCAAACCCCAGAGCTGGGCTGGAGCTCCGTGGGAGCTAGGACTATGTCCCCAA[CG]ACCCAGGCCGGGGACTTTTCTACCCGCGCCCTCCGTCTGCGGAGGAAGGGTCAGGGCAGC	37	7	156798810	CCCCAGAGCTGGGCTGGAGCTCCGTGGGAGCTAGGACTATGTCCCCAACG	7	156491571	R			NA	NA	MNX1	NM_001165255;NM_005515	Body;Body	chr7:156795355-156799394	Island			NA	7:156490542-156492088			TRUE
cg00143376	54690508	54690508	54690508	TTCTTTTTTCTATTTTCTATCACCTAAACTATTCAATCTCCATATTTAAC	0.000295826	NA		II			CCACAAGTTGATTCTTTTTTCTGTTTTCTGTCACCTGAACTGTTCAGTCTCCATATTTGA[CG]CCCTTGGCACTGCCAGTTCTGGGGTTCCCTCTCCTCTATTGAGCCCCACACCCTTCCTCC	37	2	232394702	TCTTTTTTCTGTTTTCTGTCACCTGAACTGTTCAGTCTCCATATTTGACG	2	232102946	R			NA	TRUE	NMUR1	NM_006056	Body	chr2:232394763-232395337	N_Shore			NA				NA
cg00143623	45760300	45760300	45760300	CTCCTTTAAAAATAATCCRCRAAAAAATATAACTTACRAAAAACAAACCC	0.00225049	NA		II			AAGCGTCCCGTCTCCTTTAAGAGTGATCCGCGAGGGGGTGTGGCTTGCGGAGAGCAGGCC[CG]AAAGGGGGTGCGGCTCCTTTAAGTATCCGCCGGCCCGAGGCGCGGAGGCCTCCGGCCGGC	37	1	44495758	CGGGCCTGCTCTCCGCAAGCCACACCCCCTCGCGGATCACTCTTAAAGGA	1	44268345	R			NA	NA	SLC6A9	NM_001024845	5'UTR	chr1:44495629-44497112	Island			NA	1:44268193-44269699	1:44495533-44496231	Promoter_Associated	NA
cg00143868	51649330	51649330	51649330	ACTATAAAATAAAATCTAATTCCTCCCCAACTAACTCAAAAAATATTCRC	0.00129053	NA		II			GCACTGTGGCAGCTGTGAGATAAAGTCTGGTTCCTCCCCAGCTGGCTCAGGAAATGTTCG[CG]GATACAACGGCGGCCCCCTCTGGGCATACCTGCCTGTGGAGCGGAGAGTGGACGGTGTGA	37	16	3661890	CGCGAACATTTCCTGAGCCAGCTGGGGAGGAACCAGACTTTATCTCACAG	16	3601891	R			NA	NA	BTBD12	NM_032444	TSS1500	chr16:3661120-3661775	S_Shore			NA	16:3600860-3602079	16:3660584-3662298	Promoter_Associated	NA
cg00144335	46637445	46637445	46637445	AACTAAACAAAAATAAACAACRCTACRATCCATCCCTAAAACTTTAAAAC	0.000695191	NA		II			TCTGAAGAGGGAACTAAGCAGAGGTGAACAGCGCTGCGATCCATCCCTGGAGCTTTGGAG[CG]CAGACTCTCGGGCGTGCGGCGGTGTCAGAGCCGCGCTTGCGGGAGGACTGCGCGGGGCAC	37	4	107176	CGCTCCAAAGCTCCAGGGATGGATCGCAGCGCTGTTCACCTCTGCTTAGT	4	97176	R			NA	NA	ZNF718	NM_001039127	Body	chr4:107146-107898	Island			NA	4:96999-98157			NA
cg00144673	43632363	43632363	43632363	AAAAAAAACCTAATACAACTCCAACTACTACTCCAACAACTCTTCAACTC	1.36e-06	NA		II			TGCTCCCTCCCTTAATTCCCTGACCAGGGCCCTGGGACCCACCGCACAGCTGAGCTGGCC[CG]AGCTGAAGAGTTGTTGGAGCAGCAGCTGGAGCTGTACCAGGCCCTCCTTGAAGGGCAGGA	37	6	31497557	AGGAGGGCCTGGTACAGCTCCAGCTGCTGCTCCAACAACTCTTCAGCTCG	6	31605536	F			NA	NA	MCCD1	NM_001011700	Body					TRUE				NA
cg00145150	53703460	53703460	53703460	TACTTTATATTCTAACTCTACTAACAACTAATTAAACAATATCCACCCAC	0.0062442	NA		II			GTTTTTCTTCCTGCTTTATATTCTGGCTCTGCTGGCAGCTGATTAGACAGTGTCCACCCA[CG]TTAAGGGTGGGTCTGCCTTTCCCAGCCCACTAATGCAAAAGTTAATCTCCTTTGGCAACA	37	19	46713976	CGTGGGTGGACACTGTCTAATCAGCTGCCAGCAGAGCCAGAATATAAAGC	19	51405816	R			NA	NA	DKFZp434J0226	NR_027003	Body					NA				NA
cg00145253	25606486	25606486	25606486	ATTACACACACACTTACCAAAAAAACAACCRAAACCCRAAACCATAAACC	0.000117375	NA		II			GGAGCGGGGGACGAGGACTCGTGCTCCTCCTCGGCCCCGCTGTCCCCGTCGTCCTCGCCC[CG]GTCCATGGCCTCGGGCTCCGGCTGCCCTCCTGGCAAGTGTGTGTGCAACAGTTGCGGCCT	37	1	75602857	TTGCACACACACTTGCCAGGAGGGCAGCCGGAGCCCGAGGCCATGGACCG	1	75375445	F			NA	NA	LHX8	NM_001001933	Body	chr1:75601998-75602878	Island			NA	1:75374468-75375627			NA
cg00145904	12753312	12753312	12753312	AAAAAAATAAACAAATATAACCTCRAACAACCTACCCTCRCAAAAAACTC	8.72e-05	NA		II			GGCCTGGAGTAGGGAAGGTGGGCAGGTGTGGCCTCGGGCAGCCTGCCCTCGCAGGGGACT[CG]GTCCCCGGGGACCTCAGAGCCACTGGCCAGGTGTGTGCCTGCCAGGTCAGGCCCTGGCCC	37	1	10697703	GGAAGGTGGGCAGGTGTGGCCTCGGGCAGCCTGCCCTCGCAGGGGACTCG	1	10620290	R			NA	NA	CASZ1	NM_001079843	3'UTR	chr1:10698299-10698910	N_Shore			NA				NA
cg00145911	69650499	68732470	69650499	ACACCTAAATAAACTAAAACCTCCACCTATTAACCTAACCCTAATATCCA	0.0132967	68732470	ACGCCTAAATAAACTAAAACCTCCGCCTATTAACCTAACCCTAATATCCG	I	A	Red	AAGGCCCAGCACACGCCTGAGTGGACTGAAGCCTCCGCCTGTTGACCTGACCCTGGTGTC[CG]GTCAGAGCGGGTGGTGGTCCCTGAACCCACACGGGCTCCCAGACCATGTCTGTGTTTCTT	37	1	867938	CGGACACCAGGGTCAGGTCAACAGGCGGAGGCTTCAGTCCACTCAGGCGT	1	857801	R			NA	NA	SAMD11	NM_152486	Body	chr1:869332-871872	N_Shore			NA		1:867936-868507	Unclassified_Cell_type_specific	NA
cg00145961	39648438	39648438	39648438	TCTATAAACAAAACTAAAAACTAACCRAATATAACRTCACCAAATCCTAC	1.64e-05	NA		II			GCTGGCTGAGTCCTCCTCACCACTGATGACAGCCACGGGACCTGCACACACCAAGAGAGA[CG]CAGGACCTGGTGACGTCACATCCGGCCAGTTTCCAGCCCTGTCCACAGACAACCCCCAAC	37	15	88576296	CGCAGGACCTGGTGACGTCACATCCGGCCAGTTTCCAGCCCTGTCCACAG	15	86377300	F			NA	NA	NTRK3	NM_001007156;NM_001012338;NM_002530	Body;Body;Body					NA				NA
cg00145985	46787477	46787477	46787477	CTAAAAATAACATTTTACACTCTTACTAATCATTTTACATTAACTTCTTC	0.012756	NA		II			TTTAGGGATTTCTTAAGGCAAATCTTAAGAACTAAAACATCAACAAGAAAAGTCAATTAT[CG]AAGAAGCTAATGCAAAATGACTAGCAAGAGTGTAAAATGCTACTTCTAGAAAAGTGGTTT	37	7	82019862	CGAAGAAGCTAATGCAAAATGACTAGCAAGAGTGTAAAATGCTACTTCTA	7	81857798	F			NA	NA	CACNA2D1	NM_000722	Body					TRUE				NA
cg00146085	48700341	48700341	48700341	CCCATATCACACTATATACTCCAATTAACCATAAACAAAAATAATTAAAC	0.000325815	NA		II			AATCAATCAATTTGGCACCATCTGCAGTGGAGAGGAATATAGACAAAGGTAAAGATGCAG[CG]TTCAATCATTCCTGCCCATGGTTAACTGGAGCACATAGTGTGACATGGGTTTCTGAGTAA	37	2	1268037	CCATGTCACACTATGTGCTCCAGTTAACCATGGGCAGGAATGATTGAACG	2	1250609	F			NA	NA	SNTG2	NM_018968	Body	chr2:1266419-1266661	S_Shore			NA				NA
cg00146096	70646502	38635425	70646502	ACACACAATAACAAAATCCCAAATACTAACATAAATAATACTTAAAACCA	0.0219544	38635425	ACGCACGATAACGAAATCCCAAATACTAACGTAAATAATACTTAAAACCG	I	C	Grn	CTGCAAGGCCCGGCGCACGGTGGCGGGGTCCCAGGTGCTGACGTAGGTAGTGCTTGAGAC[CG]CCAGAAGCTCGGAAAAGCGATCCAGGTGCTGCAGAAGGGATTCCATGAGGTGCGCGAAGG	37	11	22647309	GCGCACGGTGGCGGGGTCCCAGGTGCTGACGTAGGTAGTGCTTGAGACCG	11	22603885	R			NA	TRUE	FANCF	NM_022725	1stExon	chr11:22646706-22647441	Island			NA	11:22603260-22604073	11:22646166-22647866	Promoter_Associated	NA
cg00146565	74753471	74753471	74753471	ACTAAAAACCRTCCAACAAATCATCTCTAAAAAAATAACCCAACTCACCC	0.00378677	NA		II			CCCTGCGTACCTGGGCTCGGTAGAGGCTGCAACACCGGCTGCAGCCTGCTCAGCTCCTCG[CG]GGTGAGCTGGGTCACCCTCTCAGAGATGACCTGTTGGACGGTCCCCAGCTGGCGAAAGGT	37	2	238283105	CTGGGGACCGTCCAACAGGTCATCTCTGAGAGGGTGACCCAGCTCACCCG	2	237947844	F			NA	NA	COL6A3	NM_057164;NM_004369;NM_057166;NM_057165;NM_057167	Body;Body;Body;Body;Body	chr2:238280475-238280769	S_Shelf			TRUE				NA
cg00146655	48640464	48640464	48640464	CCCAAACTCCTAACATTATAATCTACCATCCTTAATTAAATCCTATAAAC	0.0111506	NA		II			ATTTCCTGATAATTATTTTTTTTTTCCATTAACAGTATAGATCACCTTGGCTTTAAGTGC[CG]TTTACAGGATTCAATTAAGGATGGCAGATTACAATGTCAGGAGTCTGGGGAGAAGGAGTG	37	3	7517194	CCAGACTCCTGACATTGTAATCTGCCATCCTTAATTGAATCCTGTAAACG	3	7492194	F			NA	NA	GRM7	NM_181874;NM_000844	Body;Body					TRUE				NA
cg00146864	23646340	23646340	23646340	ACAACRAAAAAAACAACCCTAAATAAAACTTTCATCTCTTTCACATCTCC	5.78e-11	NA		II			AGAGGGTGCCAACAACGAAGAAAACAACCCTGGATAAAGCTTTCATCTCTTTCACATCTC[CG]CAGATCTCTCACCAGACCCTAGCCAGGGATGAACTGTTATCAATCACCAAAAAAAAAAAA	37	17	43392332	CAACGAAGAAAACAACCCTGGATAAAGCTTTCATCTCTTTCACATCTCCG	17	40748115	R			NA	NA	MAP3K14	NM_003954	5'UTR	chr17:43393891-43394938	N_Shore		CDMR	NA				NA
cg00146928	74736460	74736460	74736460	CATCTATCATTCRTTATACTTAAAAAACTCTTTTCATCTCTTTATTCTTC	0.004395	NA		II			AAAAATTTTGAGGGAAAGCAAAATGTAAATTAAGCTCTGAAGTATGAGTAGTGGTTGTCT[CG]AAGAACAAAGAGATGAAAAGAGCTTTCTAAGCATAACGAATGACAGATGCAAAGGAGGGA	37	12	9269671	ATCTGTCATTCGTTATGCTTAGAAAGCTCTTTTCATCTCTTTGTTCTTCG	12	9160938	F			NA	NA	A2M	NM_000014	TSS1500					TRUE				NA
cg00147509	46644408	46644408	46644408	AACAAAAAACAAAACTAACTACCTAACAAAAAAATATCTACAAACTAAAC	0.0126816	NA		II			TTTTGCAACATCAAACAGTGAGGAGTGGAAGGTTCCAGATCACGGCCCAGGGACCCCTGG[CG]TTCAGTTTGCAGACATTCTCTTGCCAGGCAGCCAGCTTTGCTTCCTGTCTGACTTTTGCT	37	22	48917166	ACAGGAAGCAAAGCTGGCTGCCTGGCAAGAGAATGTCTGCAAACTGAACG	22	47295830	F			NA	NA	FAM19A5	NM_001082967	Body				CDMR	NA				NA
cg00147638	22684405	22684405	22684405	AACTAAAAAAACTAACTTAAATATATTCTCAAACCATCTCTACCAACAAC	0.00276401	NA		II			AGGGGAAGCTGGGCTGGGGGGACTGGCTTGGATGTGTTCTCAAACCATCTCTGCCAGCAG[CG]TGCTGGGTCCTGCCCCATCTGTACAATGAGGGGAACCCCGCTCGAGGGTGGTGGGGGTGG	37	1	25228039	CGCTGCTGGCAGAGATGGTTTGAGAACACATCCAAGCCAGTCCCCCCAGC	1	25100626	R			NA	NA	RUNX3	NM_004350;NM_001031680	3'UTR;3'UTR	chr1:25228496-25229132	N_Shore			NA		1:25228033-25228423	Gene_Associated	NA
cg00147863	40682489	40682489	40682489	CCCTTTACCTACTCAAATATAATCTCTACACAAACCCTACCTCTATCTCC	0.000453526	NA		II			AGCCCCGCCTTCCCTTTACCTGCTCAGATATGGTCTCTGCACAAGCCCTACCTCTGTCTC[CG]AGCCCCACCTTCTCTTTAACCACTCAGATGTGGAGGTCTCTGCTCAAGCCCCACCACCAC	37	19	3869599	CGGAGACAGAGGTAGGGCTTGTGCAGAGACCATATCTGAGCAGGTAAAGG	19	3820599	R			NA	NA	ZFR2	NM_015174;NR_027149;NM_001145640	TSS1500;TSS1500;TSS1500	chr19:3870788-3871043	N_Shore			NA				NA
cg00148286	51617371	51617371	51617371	ACTAATATCATCCTTAACAAATAATCAAACTAAAACACAAAAACCACTCC	2.4e-07	NA		II			AGACACAGTGTGAGACCCTTGCTCACCCGTGGCCGGGAGGCCGGCCCCGAAAGCCAGGGT[CG]GAGTGGCCTCTGTGCCTCAGTTTGACCATCTGCCAAGGATGACACCAGCTGTGGTCAAGC	37	4	1210066	CGGAGTGGCCTCTGTGCCTCAGTTTGACCATCTGCCAAGGATGACACCAG	4	1200066	F			NA	NA	CTBP1	NM_001328;NM_001012614	Body;Body	chr4:1209765-1210193	Island			NA	4:1199766-1201472			NA
cg00148325	23700332	23700332	23700332	CCAAACCAAATCTAAAATACRCCTAACTTAAAAACCATATCCTTACTACC	0.0119324	NA		II			CCTAGAGCACCCCAGGCCAGATCTGGGGTGCGCCTGGCTTGGAGGCCATGTCCTTGCTGC[CG]CCTCTCCTGGGGCCTGCGTCTGCTCCCACCCTGCCGCATGGGCCTTAGCAATCACTTAGC	37	17	72244451	CGGCAGCAAGGACATGGCCTCCAAGCCAGGCGCACCCCAGATCTGGCCTG	17	69756046	R			NA	NA	TTYH2	NM_052869;NM_032646	TSS200;Body					NA				NA
cg00149213	73734322	73734322	73734322	TAACTATCTCCAAAAACCRAATATTACAAATTCTCTAAACAATTCTCTCC	0.020931	NA		II			GCTTCTTTCCTTAGCTGTCTCCAGGAACCGGATGTTGCAGATTCTCTGAGCAGTTCTCTC[CG]GTAAGTCTTCTTGGATTGCAAAGAAAAGATGTTTCATTGGATCACTCCTCAAATTTGGCA	37	1	160617124	CGGAGAGAACTGCTCAGAGAATCTGCAACATCCGGTTCCTGGAGACAGCT	1	158883748	R			NA	NA	SLAMF1	NM_003037	TSS200					NA		1:160616793-160617176	Promoter_Associated	NA
cg00149492	65646393	65646393	65646393	AAAAAACTATAATAATAAACCCCCTAAACACACRCACTAACACTATATAC	4.18e-07	NA		II			GAACCATTCAGGAAAGACTGTGATGGTAGACCCCCTAAACACACGCACTGACACTGTGTG[CG]CATGAGCAGATAGGCTGGAGTCTTCAGCTCACAAACTTCTTCCACGTTCCCGATTACCCA	37	1	36038468	CGCACACAGTGTCAGTGCGTGTGTTTAGGGGGTCTACCATCACAGTCTTT	1	35811055	R			NA	NA	TFAP2E	NM_178548	TSS1500	chr1:36038927-36040051	N_Shore			NA		1:36038329-36039236	Unclassified_Cell_type_specific	NA
cg00149708	30729332	30729332	30729332	AAATAAAAAAATCTCAATTATCTAATTCATCTTTCAACCTCAAAATAAAC	0.0084223	NA		II			CTGGTGTGAGTTCAAGCCCCAGGTCACAGATGTCCCTGCCCGCGTGCCGCCGCCGCCACC[CG]CCCACCCTGAGGTTGAAAGATGAACCAGATAACTGAGACTCCCCCATCTTGTTTCCAAAG	37	19	56047884	CGCCCACCCTGAGGTTGAAAGATGAACCAGATAACTGAGACTCCCCCATC	19	60739696	F			NA	NA	SBK2	NM_001101401	TSS1500	chr19:56047403-56047668	S_Shore			NA				NA
cg00149805	15794308	52706315	15794308	ATCATAACCCACTCTCAAAAAACTATTAAACACACCTCCCAAACAAAACA	0.000162374	52706315	ATCATAACCCGCTCTCAAAAAACTATTAAACACACCTCCCAAACGAAACG	I	A	Red	GGCAGCCCCCTCCCGGCAGTCACCCCGTCCGGGAGGTGCGGGGCGCCTCTGCCCAGCCGC[CG]CCCCGTCTGGGAGGTGTGCCCAACAGCTCCTTGAGAGCGGGCCATGATGACGATGGCGGT	37	1	227464259	ATCATGGCCCGCTCTCAAGGAGCTGTTGGGCACACCTCCCAGACGGGGCG	1	225530882	F			NA	NA	CDC42BPA	NM_014826;NM_003607	Body;Body					NA	1:225530073-225530888			NA
cg00150025	67784313	49621370	67784313	CAACATTAACACAACTCTCACAACTACTCCCAAACTAAAATAAAAACACA	3.32e-06	49621370	CAACATTAACACAACTCTCACAACTACTCCCAAACTAAAATAAAAACGCG	I	A	Red	GACTCACTGAACTAACGATGGCTGTCACGCACCACACACCTGCAGCTCCCCTCAGACGCT[CG]CGCCCCCACTCTAGCTTGGGAGCAGCTGTGAGAGCTGTGCTAATGTTGTGCTTGAGAAGA	37	15	42448079	CGCGCCCCCACTCTAGCTTGGGAGCAGCTGTGAGAGCTGTGCTAATGTTG	15	40235371	F			NA	NA	PLA2G4F	NR_033151;NM_213600	Body;Body					NA	15:40235132-40235374			NA
cg00151007	21765482	21765482	21765482	CTCCCACRCTTCTAAAAAAAAATTCCAAATTAAACTTCTATACCCAAAAC	0.0130075	NA		II			GCCTCCACCACCTCCCACGCTTCTGAGAAGAGGTTCCAAATTGGGCTTCTGTGCCCAGAG[CG]TCCACAGCACCATTCCCAGTGTAGACTCCCAGTCTTCTCCACATTGCTGTCATGGCGTCA	37	3	184769954	CGCTCTGGGCACAGAAGCCCAATTTGGAACCTCTTCTCAGAAGCGTGGGA	3	186252648	R			NA	NA	VPS8	NM_015303;NM_001009921	3'UTR;3'UTR					NA				NA
cg00151565	63783398	63783398	63783398	TCAATACAAACATTAAACTCCTCCCTATAAACTCAACATTACTACAACTC	0.0160308	NA		II			AGAGAGAGAGAGAGGGAGAAATTTAAAAGTATTAAGTCACCCATCCTACCTGAGCACCCA[CG]AGCTGCAGCAATGCTGAGTTCACAGGGAGGAGCTCAATGTCTGTATTGATAGTGGTCTGG	37	1	173961904	CAATACAGACATTGAGCTCCTCCCTGTGAACTCAGCATTGCTGCAGCTCG	1	172228527	F			NA	NA	RC3H1	NM_172071	1stExon					NA				NA
cg00151732	61801487	44773366	61801487	AAACAACTAAAACACCTACAACTCCTCAAACTAAAAACCAAACAACAACA	0.00332063	44773366	AAACAACTAAAACACCTACAACTCCTCAAACTAAAAACCGAACAACGACG	I	A	Red	GAGGACCTCCGAAAGCAGCTGGAGCACCTGCAGCTCCTCAAGCTGGAGGCCGAGCAGCGG[CG]GGGCCGCAGCAGCAGCATGGGCCTGCAGGAGTACCACAGCCGCGCCCGGGAGAGCGAGCT	37	16	570188	AAGCAGCTGGAGCACCTGCAGCTCCTCAAGCTGGAGGCCGAGCAGCGGCG	16	510189	R			NA	NA	RAB11FIP3	NM_014700;NM_001142272	Body;Body					NA	16:509624-510246	16:569704-570219	Unclassified_Cell_type_specific	NA
cg00151906	39792456	22789484	39792456	CTCCTCCATCCAAATAAATAAAAACTAAAAATACATCACCATAATAATCA	0.00368393	22789484	CTCCTCCATCCAAATAAATAAAAACTAAAAATACGTCGCCATAATAATCG	I	A	Red	GGCCTCCTCCGTCTCCTCCATCCAGGTGAGTGAGGACTGGAAGTACGTCGCCATGGTGAT[CG]ACCGCCTCTTCCTCTGGATCTTTGTCTTTGTCTGTGTCTTTGGCACCATCGGCATGTTCC	37	1	154548273	CTCCTCCATCCAGGTGAGTGAGGACTGGAAGTACGTCGCCATGGTGATCG	1	152814897	R			NA	NA	CHRNB2	NM_000748	Body	chr1:154543818-154544713	S_Shelf		CDMR	TRUE				NA
cg00152041	67604473	67604473	67604473	CAAACTAAAAAATACCCCRCTTAACRTACAAAACCCTCTTTAAAACTACC	0.00366823	NA		II			TGGTGAACCCTCAGGCTGGGGGGTGCCCCGCTTGGCGTGCAAGGCCCTCTTTGGAGCTGC[CG]TGGGACCTGGCTATGCGTCCTGTTTCTGTCTGGAGGCGGCTGGAACGCGGTAGTTTTCCA	37	20	61274867	CGGCAGCTCCAAAGAGGGCCTTGCACGCCAAGCGGGGCACCCCCCAGCCT	20	60745312	R			NA	NA	SLCO4A1	NM_016354	5'UTR	chr20:61273277-61274917	Island			NA	20:60743520-60745500			NA
cg00152047	24788417	24788417	24788417	CCCAACACAACCTCCTAATTCTATTTCACCAAAAACAAAACRTTTACCAC	0.00121326	NA		II			AGGGAGGGTCTCCCAACACAGCCTCCTAGTTCTGTTTCACCAGGGGCAGAGCGTTTACCA[CG]AATGCCATTCAATTTTATCATGCAATCAGTTGATTTTTAATTATAATTTAATTTTTAACC	37	1	166893354	CGTGGTAAACGCTCTGCCCCTGGTGAAACAGAACTAGGAGGCTGTGTTGG	1	165159978	R			NA	NA	ILDR2	NM_199351	Body	chr1:166889776-166890649	S_Shelf			NA				NA
cg00152117	29715325	29715325	29715325	TCTATAAAACTCAAAAAACAACCATACCTAAAATCCAAAAACAAATCCAC	0.000940152	NA		II			CAAGAGGCGGAGGTGAACGAGGAGAGAGGTGGGAGGTCAGCTCCTGGGCCAACCTGTAGT[CG]TGGATCTGCTCTTGGATCTCAGGCATGGCTGCCTCTTGAGCTTCACAGAGAACACCACGG	37	1	156928845	CGTGGATCTGCTCTTGGATCTCAGGCATGGCTGCCTCTTGAGCTTCACAG	1	155195469	F			NA	NA	ARHGEF11	NM_014784;NM_198236	Body;Body					TRUE				NA
cg00152126	48620379	48620379	48620379	AAATAAAATTACTAACTACTTATACATTATATCAATTACTACTCACAACC	4.7e-06	NA		II			AATAAACAAAAGCAGCTACCACTTCTAGAATGCTCCATGTGCGATGAGAACTATTCTAAG[CG]GCTGTGAGTAGTAACTGACACAATGCATAAGCAGCCAGCAATTCCATTCTGCTGGGCTGG	37	10	126744846	CGGCTGTGAGTAGTAACTGACACAATGCATAAGCAGCCAGCAATTCCATT	10	126734836	F			NA	NA	CTBP2	NM_001083914;NM_001329	5'UTR;5'UTR					TRUE				NA
cg00152259	36680487	36680487	36680487	CTTCAACCCCATCTAACTCCTTACTCCTATACTTAAATTCTAAACTATTC	1.17e-06	NA		II			TTGACAAAGCGAAGACAGGTGTGCAAGGCTGAGAGGTCTGGAAGAGCATGCAGTGCTGTG[CG]AACAGCTCAGAACTTAAGCACAGGAGCAAGGAGCCAGATGGGGCTGAAGAGGCAGCTCCT	37	17	34957477	TTCAGCCCCATCTGGCTCCTTGCTCCTGTGCTTAAGTTCTGAGCTGTTCG	17	32031590	F			NA	NA	MRM1	NM_024864	TSS1500	chr17:34957833-34958790	N_Shore			NA		17:34957379-34960313	Promoter_Associated	NA
cg00152611	22748432	22748432	22748432	AATATAAATAATCATCCCTACAATACTCTATCAAAACTATAAAAAAACAC	0.000270869	NA		II			TAGACAACTGCAGTATAAATAATCATCCCTACAGTGCTCTGTCAGGGCTGTAGGGGGGCA[CG]GGACAGTAAGGGAGGAGGCTGAACTGCGCGATTTTACCTGGCTTCTCCAGAAGGGTAAGG	37	4	123300380	GTATAAATAATCATCCCTACAGTGCTCTGTCAGGGCTGTAGGGGGGCACG	4	123519830	R			NA	NA	ADAD1	NM_139243;NM_001159285;NM_001159295	5'UTR;TSS1500;TSS1500	chr4:123300407-123300805	N_Shore			NA				NA
cg00152646	48703373	71710408	48703373	ACAACCTTTTTTACAAAATACTTACTATATACCAAACCCATATTATCTCA	0.0129853	71710408	ACAACCTTTTTTACGAAATACTTACTATATACCGAACCCGTATTATCTCG	I	A	Red	GGTTTGATATGGACAGCCTTTTTTACGGAGTGCTTACTGTGTGCCGAACCCGTGTTATCT[CG]GTCAGTCCCCGGGACAATCTGCCTTATTTGGTACTTTCATTATGCCCATTTCACAGAAGA	37	22	27014548	ACAGCCTTTTTTACGGAGTGCTTACTGTGTGCCGAACCCGTGTTATCTCG	22	25344548	R			NA	NA	CRYBB1	NM_001887	TSS1500					NA				NA
cg00152799	17785302	17785302	17785302	ATCCAAAACACCCACTAAAAATACTTTAAAAATACTCCTATACTATATTC	0.0135268	NA		II			TCTTAGCTGCTGTCCAGGGCACCCACTGGAAGTACTTTGAAGATGCTCCTGTACTGTATT[CG]GGGCAGGTCTACATACAAGACAAAATAACGTTTAGGAATATTTATTAACAGACTTAATTA	37	18	54306261	TCCAGGGCACCCACTGGAAGTACTTTGAAGATGCTCCTGTACTGTATTCG	18	52457259	R			NA	NA	TXNL1	NR_024546;NM_004786	TSS1500;TSS1500	chr18:54305419-54306087	S_Shore			NA		18:54305037-54306543	Promoter_Associated	NA
cg00153101	40612417	40612417	40612417	CAAAAAAAAATCAACACTAAACCTAAACAAACCCCTCCTACTATATATAC	0.0122819	NA		II			TTTGAGCTGGGGCCCAGTGCCCTCTGGGTCCTGCTGGCTGCAGCTGGCCCTCGGGGAACC[CG]CACACACAGCAGGAGGGGCCTGCCCAGGCCCAGTGCTGACTCTCTCCTGCCATGCTCTCG	37	1	2431753	AGGAGAGAGTCAGCACTGGGCCTGGGCAGGCCCCTCCTGCTGTGTGTGCG	1	2421613	F			NA	NA	PLCH2	NM_014638	Body	chr1:2433648-2434065	N_Shore			NA		1:2430682-2432114	Unclassified_Cell_type_specific	NA
cg00153368	16728313	16728313	16728313	TAAACTCTTCTTAACTAAATTACTTTATTTCTTTTTTTTCTTTTTAAAAC	0.00443977	NA		II			ATAGGACGCGCTGAGCTCTTCTTGGCTGAGTTGCTTTATTTCTTTTTTTTCTTTTTGAGA[CG]GAGTCTCGCTCTGTCGCCCAGGCTGGAGTGCAGTGGCGGGATCTCGGCTCACTGCAAGCT	37	11	57996423	GAGCTCTTCTTGGCTGAGTTGCTTTATTTCTTTTTTTTCTTTTTGAGACG	11	57752999	R			NA	NA	OR10Q1	NM_001004471	TSS200					NA				NA
cg00153543	45639392	45639392	45639392	AAACACACACCCRACTTACTTTACTCCACATCATACCTATAAAATTCATC	0.000311221	NA		II			AATGAAGAAGAGCAAGCGTCAGCCTGGAGAAGGCCCAGGGTGTGAATGGTGAAACAACAC[CG]ATGAATCCCACAGGCATGATGTGGAGCAAAGCAAGCCGGGTGTGTGTTTCCACTTGTGGG	37	16	84259830	AACACACACCCGGCTTGCTTTGCTCCACATCATGCCTGTGGGATTCATCG	16	82817331	F			NA	NA	KCNG4	NM_172347	Body	chr16:84256189-84256462	S_Shelf			NA				NA
cg00153942	71621311	71621311	71621311	ATAAAAAATATAACTCTAACTACTATATACCCATCTACTACTACAAACCC	0.00732868	NA		II			CGGCTCTGGCTGTGGGGGATGTGGCTCTAGCTGCTGTGTGCCCATCTGCTGCTGCAAGCC[CG]TGTGCTGCTGTGTGCCAGCCTGTTCCTGCTCCAGCTGTGGCTCCTGTGGGGGCTCCAAGG	37	11	71249212	CGGGCTTGCAGCAGCAGATGGGCACACAGCAGCTAGAGCCACATCCCCCA	11	70926860	R			NA	NA	KRTAP5-8	NM_021046	1stExon					NA				NA
cg00154357	16709464	26705345	16709464	TAAATAAATAAATATAAAAAAACAACATTAAACTAAACCCCTACAACCCA	1.24e-05	26705345	TAAATAAATAAATATAAAAAAACGACGTTAAACTAAACCCCTACAACCCG	I	C	Grn	CTGCGCCCTGGGTGGGTGGGTGAATGTGAAGAGGCGGCGTTGGGCTAGGCCCCTGCAGCC[CG]CTCGGAGCGTCCTAGGCCCGGGGCTGCGCTGTGAAAGACCCAGATTCTCATCCCAGAGGC	37	3	147111280	CGGGCTGCAGGGGCCTAGCCCAACGCCGCCTCTTCACATTCACCCACCCA	3	148593970	R			NA	NA	ZIC4	NM_001168378;NR_033119;NM_032153;NM_001168379;NR_033118	Body;TSS1500;Body;Body;TSS1500	chr3:147108511-147111703	Island			NA	3:148593633-148594412	3:147111228-147111282	NonGene_Associated	TRUE
cg00154554	53602300	53602300	53602300	TTAAAAATTACCRTAATCCAAAAAAAACTCTCTTTCATTCTCAACATTAC	0.000310249	NA		II			AAAAACCACCTTTTAAAGCTGTAAAAACACAGTCAATTAAACTAGTAGAGTTTTATTTCA[CG]TAATGCTGAGAATGAAAGAGAGCCTTCTTTGGACCACGGTAATCTTTAATATACAGGAAT	37	1	8729713	TAAAGATTACCGTGGTCCAAAGAAGGCTCTCTTTCATTCTCAGCATTACG	1	8652300	F			NA	NA	RERE	NM_012102;NM_001042681	5'UTR;5'UTR					TRUE				NA
cg00154846	16626339	16626339	16626339	TACTAACCCAAACACAAACCATAACTAAAATAAAATTCAAAAACAAAACC	0.0202035	NA		II			TGACCCCAAGAACCAGAAAGCCAGGAGCAGCTGGGGAGGGCCCTGGCCCGGGAGAGACAG[CG]GTCCTGTTTCTGAACCCCATCCCAGCCATGGCCTGTGTCTGGGCCAGCATCCCCGACCAG	37	1	2130580	CGGTCCTGTTTCTGAACCCCATCCCAGCCATGGCCTGTGTCTGGGCCAGC	1	2120440	F			NA	NA	C1orf86	NM_001146310	Body	chr1:2126048-2126642	S_Shelf			NA		1:2130416-2132750	Unclassified	NA
cg00155063	28684391	56723496	28684391	AAAACACAACTAAAAAACAAACTACCTATCTACTTCCTCCAATACATCCA	0.0303135	56723496	AAAACACAACTAAAAAACGAACTACCTATCTACTTCCTCCGATACGTCCG	I	A	Red	TCAGGTCCACTGAGGGCACAGCTGGAGGGCGAGCTGCCTGTCTGCTTCCTCCGATGCGTC[CG]GGGGCTACTGCAGAGTCTGTTTTCTGCGGCCTCTGGGGACAGGGCAAGCGAGGGAGGTCT	37	1	12227825	AGGGCACAGCTGGAGGGCGAGCTGCCTGTCTGCTTCCTCCGATGCGTCCG	1	12150412	R			NA	NA	TNFRSF1B	NM_001066	Body	chr1:12226876-12227712	S_Shore		DMR	TRUE	1:12149480-12150441	1:12226628-12228209	Promoter_Associated	TRUE
cg00155397	54652324	54652324	54652324	AAAAAAACTTCCATCACRTCATTACAAATACRCAACTTATCACRACTAAC	0.015896	NA		II			CAACGTCAATTCATTCTAAGTGCCTGGTGAAGGTAGAAATCAGAAACCGTGTCTGTGTCA[CG]TTAGTCGTGACAAGCTGCGTACCTGCAATGACGTGATGGAAGCCTCCTCCTCGGGTCCCT	37	1	240775160	AGGAGGCTTCCATCACGTCATTGCAGGTACGCAGCTTGTCACGACTAACG	1	238841783	F			NA	NA	GREM2	NM_022469	5'UTR				RDMR	TRUE	1:238841642-238842025			TRUE
cg00155423	51600489	23765412	51600489	TAAATCAACATCTACAAATAAACAACCCAAAATCCCCTAAACCCTAATCA	0.0015697	23765412	TAAATCAACGTCTACAAATAAACGACCCGAAATCCCCTAAACCCTAATCG	I	A	Red	CGCATCACCGAGTGGGTCAGCGTCTGCAAGTGAGCGGCCCGGGGTCCCCTGGGCCCTGAT[CG]AGGTCCCCTCCTGGAGCCTGGCCCTCTGAGGCTTACGGTCTTGGCAAGGCAGCATCGCCT	37	2	219758021	TGGGTCAGCGTCTGCAAGTGAGCGGCCCGGGGTCCCCTGGGCCCTGATCG	2	219466265	R			NA	NA	WNT10A	NM_025216	3'UTR	chr2:219757458-219758001	S_Shore			TRUE		2:219757399-219758059	Unclassified	TRUE
cg00155526	41682324	41682324	41682324	RAACTTCTATAATTTCCACCAAAAATACCCCTATATATCTAAATTCTAAC	0.00799272	NA		II			CCCTTATAAACGAGCTTCTGTGGTTTCCACCAAAAATGCCCCTGTGTGTCTGAATTCTGG[CG]ACACTCACTTCTCCCAGAGTGTTCTGCAACGCAGTTTCTAATGCGCCCAGAGCTAAGCTT	37	5	32713290	CGCCAGAATTCAGACACACAGGGGCATTTTTGGTGGAAACCACAGAAGCT	5	32749047	R			NA	NA	NPR3	NM_000908	Body	chr5:32709910-32714450	Island			NA	5:32748997-32750283	5:32712487-32713436	Unclassified_Cell_type_specific	NA
cg00155879	44670485	44670485	44670485	TCCTAAAACCCTCATAAACTAACCCAATACCTAAAACAAATTCTACTCCC	0.0182992	NA		II			TCCGGGTCCGAGACCCTCGTAGTGTGGGGAATTTCCTGGGAGGAAGATACTACGCGGGGC[CG]GGAGCAGAATTTGCTCCAGGCACTGGGCCAGTCCATGAGGGCTCCAGGATCCAGGGGCCC	37	10	26222849	CCTGGAGCCCTCATGGACTGGCCCAGTGCCTGGAGCAAATTCTGCTCCCG	10	26262855	F			NA	NA	MYO3A	NM_017433	TSS200	chr10:26222921-26224022	N_Shore			NA				NA
cg00155882	38753309	38753309	38753309	CCTCCCTTCCTAAACACCATTAAAACCTCCTTATTAACAAAACTATACTC	0.0106217	NA		II			CGCCCTCAGCCCCTCCCTTCCTGGGCACCATTGGGGCCTCCTTGTTGGCAGGGCTGTGCT[CG]CACCGGATCCGAAGCGGACTCTGCATTCAGGCTCACGCGCTCTGGAAGGGAAGGGCGCTG	37	8	141110747	CTCCCTTCCTGGGCACCATTGGGGCCTCCTTGTTGGCAGGGCTGTGCTCG	8	141179929	R			NA	NA	TRAPPC9	NM_001160372;NM_031466	Body;Body	chr8:141107837-141110984	Island			NA	8:141176561-141180166	8:141110191-141111168	Promoter_Associated	NA
cg00156506	42715441	42715441	42715441	CTCACAAAATATATAAAAATCTCATCAAATAATACAATATCTCAAAACTC	0.00376069	NA		II			GGACCTGCTTCCTCCACTGGCTTCCCTGGGCCTAGTGGTGGTAAGGGTGCTTCACTCTCA[CG]AGCCCTGAGATATTGCACCATCTGATGAGATTTCCATATACTCTGTGAGCACCTTCTTCA	37	7	105648872	CGAGCCCTGAGATATTGCACCATCTGATGAGATTTCCATATACTCTGTGA	7	105436108	F			NA	NA	FLJ23834	NM_152750	Body	chr7:105650026-105650233	N_Shore			NA				NA
cg00156633	61767388	61767388	61767388	TTATATAATACAAATATACCACTTAATAAATTACAATACCTATAAAAAAC	0.00128111	NA		II			TAAACTCACAGTTGTGTGGTGCAGGTGTGCCACTTAGTGAGTTGCAGTACCTGTGAGGGA[CG]GTGACAGAGTGAAAAATATTTTTCCTCAACACATGTGACAAAAGCCTCAAATTCCAAGGA	37	5	148034578	TGTGTGGTGCAGGTGTGCCACTTAGTGAGTTGCAGTACCTGTGAGGGACG	5	148014771	R			NA	NA	HTR4	NM_000870;NM_001040172;NM_001040174;NM_001040173;NM_001040169;NM_001040171;NM_199453	TSS1500;TSS1500;TSS1500;TSS1500;TSS1500;TSS1500;TSS1500	chr5:148033472-148034080	S_Shore		RDMR	NA				NA
cg00157109	17620407	17620407	17620407	AAACAAATATAATTCCCCATAAACRTACTACCCTCTACTAAAACACACCC	0.0103969	NA		II			CTGGGGTGAGGAAGCAAATGTGATTCCCCATGGACGTGCTGCCCTCTGCTGAGACACACC[CG]GGCTATGACCAGACTCATCATTTCCCCCAAGAACCGGCCCCTTATCCCAAATACCTCCAC	37	7	151569191	AGCAAATGTGATTCCCCATGGACGTGCTGCCCTCTGCTGAGACACACCCG	7	151200124	R			NA	NA	PRKAG2	NM_016203	Body	chr7:151572761-151575106	N_Shelf			NA				NA
cg00157228	40602336	40602336	40602336	TAAAAACTTTAAAATTCCCACAATATAAACACAACTACTACCAAAATAAC	0.00103695	NA		II			GCAGAGCTGGTCTCCTGGCCGGAGCTGCCCTGGTCGCCCCCAAGTCCTAGCCTGTGCCCC[CG]CCACCCTGGCAGCAGCTGTGCTCACACTGTGGGAACTCCAAAGCCCCCACTGCAGAGGGA	37	9	138682403	GGGGGCTTTGGAGTTCCCACAGTGTGAGCACAGCTGCTGCCAGGGTGGCG	9	137822224	F			NA	NA	KCNT1	NM_020822	Body	chr9:138683881-138684094	N_Shore			NA				NA
cg00157439	41794479	41794479	41794479	AACCTAAACCCATCAAACCCTCCRAATAAAATTAACACRTATAAAAATTC	0.0124479	NA		II			ACGCAGCAGCCATGCAGCTTCACGGCACAGGGGCCCGGCCGTTCTCTCTGGATTCTGGCT[CG]AATTTTCACACGTGCCAACCTCACTCGGAGGGCCTGATGGGCCCAGGCTGTGCCGGCTCC	37	6	168936684	GCCTGGGCCCATCAGGCCCTCCGAGTGAGGTTGGCACGTGTGAAAATTCG	6	168679533	F			NA	NA	SMOC2	NM_022138;NM_001166412	Body;Body	chr6:168936452-168936664	S_Shore			NA	6:168679335-168679534			NA
cg00157477	18809465	39739409	18809465	CATCTAAAAAAAATCTAAATCCCAATAAATACATAAAAACTTTAAAACCA	0.00718808	39739409	CGTCTAAAAAAAATCTAAATCCCGATAAATACGTAAAAACTTTAAAACCG	I	A	Red	AGTTCTCATTCCCACTAGGTGTCGGGTTTCTAGAGAAGCCAATCGGTGCCGCCGCGGTCC[CG]GTTCTAAAGTCCCCACGCACCCACCGGGACTCAGATTCTCCCCAGACGCCGAGGATGGTG	37	6	29855473	CGTCTGGGGAGAATCTGAGTCCCGGTGGGTGCGTGGGGACTTTAGAACCG	6	29963452	F			NA	NA	HLA-H	NR_001434	Body	chr6:29855295-29856565	Island	high-CpG:29963444-29963490		NA	6:29963281-29964497			NA
cg00157572	55688357	55688357	55688357	TTTACACTAAAATCTACTTCTAAACATCCTAAATAAACAACTCAAATATC	1.37e-06	NA		II			CAGTCTATCCAGCAAGGCGGCCACTTCAGCCATCTCCATCACGTCCAGCGACAGCGAGTG[CG]ACATCTGAGTTGCCCATCCAGGATGCTCAGAAGCAGATTCCAGTGTAAAAACGAGAAAAA	37	14	60977961	TTACACTGGAATCTGCTTCTGAGCATCCTGGATGGGCAACTCAGATGTCG	14	60047714	F			NA	NA	SIX6	NM_007374	Body	chr14:60975732-60978180	Island			NA	14:60046947-60047715			NA
cg00158227	58804390	58804390	58804390	AACAACRTAACCATATTCTTAAACAACRTAAAAATCTTACTACACCAAAC	3.09e-05	NA		II			GTCGGCGCCGCGCTTCACCGTCGATCCGCGCCGAATGCATGGCCGCGCCGCCAGCCTGCC[CG]CCTGGTGCAGCAAGATCTCCACGTTGCTCAAGAACATGGCCACGCTGCTGGCTGCGCTGG	37	1	6514781	GCAGCGTGGCCATGTTCTTGAGCAACGTGGAGATCTTGCTGCACCAGGCG	1	6437368	F			NA	NA	ESPN	NM_031475	Body	chr1:6514108-6516325	Island			NA	1:6436742-6438912	1:6514466-6515837	Unclassified_Cell_type_specific	NA
cg00158333	23619417	23619417	23619417	CCTCCCRCCCAAAACCTAAAACTTAAACCATTTTAATTTAAAAATAAAAC	0.00141631	NA		II			AGGGGGTCTTGCCTCCCGCCCAGGGCCTGGGGCTTGAGCCATTTTGATTTGAAAGTGGGG[CG]TGAGCGGGGTGGCGCGGCGGCGGCGGCGCCGGGTCGCCATGCTGCTTCCCGAGACGCCGA	37	17	47075855	CGCCCCACTTTCAAATCAAAATGGCTCAAGCCCCAGGCCCTGGGCGGGAG	17	44430854	R			NA	NA	IGF2BP1	NM_006546;NM_001160423	Body;Body	chr17:47072820-47076042	Island		DMR	NA	17:44429782-44431193	17:47074110-47075921	Promoter_Associated	NA
cg00158434	48706304	48706304	48706304	ATATTAATTAAACTCACACTAAAAATACTCAATAATACTTTAAAACCACC	0.0201865	NA		II			AGTGTTCTCGCAACATTTCAGTGTCAAGCAGGAGTTGGCCTAGGAATCAAAAGAGGTGAG[CG]GTGGCTCCAAAGCACCACTGAGTACTTCTAGTGTGAGTCTAACCAATATTCAGTCAGAAA	37	2	73871782	CGGTGGCTCCAAAGCACCACTGAGTACTTCTAGTGTGAGTCTAACCAATA	2	73725290	F			NA	NA	ALMS1P	NR_003683	TSS1500					NA				NA
cg00158654	66662306	66662306	66662306	TATCCAAATTATTTAAACCTTTCCTATATCAATAAAACATCAACTATTAC	5.34e-05	NA		II			ATAAATTAATCATTAATGCATCTAGATCGTAAAATAGGATGTGCATTAAAATGCTCTCAC[CG]CAACAGCTGATGTTTCATTGATACAGGAAAGGCTCAAATAATCTGGACAGATGAAGTGGT	37	1	192285333	GTCCAGATTATTTGAGCCTTTCCTGTATCAATGAAACATCAGCTGTTGCG	1	190551956	F			NA	NA	RGS21	NM_001039152	TSS1500					NA				NA
cg00158770	32654500	32654500	32654500	CCAACTCACAAAAATTAAACAAATCTCTTCCCAACCTTATATTCAATAAC	0.00345744	NA		II			GCCAGCTTGCACCAGCTCACAAGGATTGGACAAATCTCTTCCCAACCTTGTGTTCAGTGA[CG]TCATGCTGGTAGCCTGAAATAGGCCACGGTGGGAGTATTTACACCATGGAAATTGGCAAA	37	8	19271585	CGTCACTGAACACAAGGTTGGGAAGAGATTTGTCCAATCCTTGTGAGCTG	8	19315865	R			NA	NA	CSGALNACT1	NM_018371;NM_001130518;NR_024040	Body;Body;Body					TRUE				NA
cg00158789	46680379	46680379	46680379	TAAAAAAATTAATCRATAACTAAAACTTCCTCCTTTAAAACTACACCTAC	6.46e-09	NA		II			GTGAGCAGGAGTGTCGTCTAACCTGCGCTGGCCACTATGTGTGTCCTCTGAGGGTTCCTC[CG]TAGGTGCAGCTTTAAAGGAGGAAGTTTTAGCCACCGATTAATTCTTTTATATTCACGAAT	37	17	59534683	AAAAGAATTAATCGGTGGCTAAAACTTCCTCCTTTAAAGCTGCACCTACG	17	56889465	F			NA	NA	TBX4	NM_018488	Body	chr17:59531723-59535254	Island			NA		17:59534560-59535125	Unclassified_Cell_type_specific	NA
cg00159100	48709363	48709363	48709363	CTAAACAACCRAAAACCCCTAAAATTCTAATTAATAAATACTCTCCTCCC	2.39e-08	NA		II			GAAGCTCCACAAAGCTCCCCGCCGCCTCTCTCGGTCTCGGCGGAGACCCCGGTGTGTCCC[CG]GGAGGAGAGTATTTACTAACCAGAACCTCAGGGGCTCCCGGCTGCCCAGACCGCCCTCTC	37	7	37487633	TGGGCAGCCGGGAGCCCCTGAGGTTCTGGTTAGTAAATACTCTCCTCCCG	7	37454158	F			NA	NA	ELMO1	NM_014800	5'UTR	chr7:37487354-37488672	Island			NA	7:37453513-37455247			TRUE
cg00159243	39648509	25683320	39648509	AACTCTAACAATACCATCACACTAATTAACAAACAAAACCCAAAACAACA	0.0029166	25683320	AACTCTAACGATACCATCACACTAATTAACAAACAAAACCCGAAACGACG	I	A	Red	CCTGTGTTCACTGGCTCTAACGGTGCCATCACACTGATTAGCAAGCAAGGCCCGGAGCGG[CG]GGATCACTCCCAGGCCCCACCTTCCACCTCTCCTCTTCCTGGAAGGCCAAAAAACAGTCC	37	12	109023799	CGCCGCTCCGGGCCTTGCTTGCTAATCAGTGTGATGGCACCGTTAGAGCC	12	107547928	R			NA	NA	SELPLG	NM_003006	5'UTR					TRUE		12:109023520-109023885	Promoter_Associated	TRUE
cg00159289	20605505	20605505	20605505	CCCCAACCACTTCCAAAACCTTACAAAAACAACATCTAAAAACAATAAAC	0.0149708	NA		II			AGGCACCCACGCCTCCCCAGCTCTCACCCATGAAGAGGAAAGTGAGCACATATTGGTAGG[CG]CCCACTGCTTCTAGATGCTGCTTCTGCAAGGTTTTGGAAGTGGTTGGGGGCTGCAGGGTT	37	7	100844060	CGCCCACTGCTTCTAGATGCTGCTTCTGCAAGGTTTTGGAAGTGGTTGGG	7	100630780	F			NA	NA	MOGAT3	NM_178176	1stExon	chr7:100845050-100845726	N_Shore			TRUE				TRUE
cg00159953	32702397	32702397	32702397	CRTAACCTTTCCTCTTTAACCTATCATTATAATTAAAAATTAATTAACCC	0.0217659	NA		II			TGTGGATGTCACGTGACCTTTCCTCTTTAGCCTATCATTGTAGTTGGGAGTTAGTTAGCC[CG]TTGAGCGTCATTGAATTTCCAGTGTTGAGCCAGCCCTGCGTGCCCGGGATAAACCCACCT	37	21	47547796	CGGGCTAACTAACTCCCAACTACAATGATAGGCTAAAGAGGAAAGGTCAC	21	46372224	R			NA	NA	COL6A2	NM_058175;NM_001849;NM_058174	Body;Body;Body	chr21:47548938-47549427	N_Shore			TRUE	21:46372141-46372363	21:47547696-47547802	Unclassified_Cell_type_specific	TRUE
cg00160027	48680505	48680505	48680505	ACTAATATACTAAATACTTTACATAAATTCACACATCCRATCCTTATAAC	0.000641099	NA		II			ATGGATTGTGTGCTAATGTGCTGAATACTTTACATAAATTCACACATCCGGTCCTTGTAA[CG]TCCTTTTGTGCTGGGAACTACTGTTATTCCCATCTTACAGATAAGGAAACTGAGTCACAG	37	16	49583602	CTAATGTGCTGAATACTTTACATAAATTCACACATCCGGTCCTTGTAACG	16	48141103	R			NA	NA	ZNF423	NM_015069	Body					TRUE				NA
cg00160253	33616361	33616361	33616361	ATTCCRCACATAATAATCATCTTAACATAAAAAAACATATCTTCTAATCC	0.00604424	NA		II			CTTAACTATGTGTTCCGCACATAATAATCATCTTAGCATAGAGGAACATGTCTTCTAATC[CG]CACAAGAGATACTATTTTTATCACGTCATAGAGGAGGTTAATAAACTTGCCTAGGTCATA	37	10	15137523	TTCCGCACATAATAATCATCTTAGCATAGAGGAACATGTCTTCTAATCCG	10	15177529	R			NA	NA	C10orf111	NM_153244	3'UTR	chr10:15138965-15139851	N_Shore			NA				NA
cg00160262	69650441	69650441	69650441	AAAAAATACACTTATTATCTTCACAATATAACTTACTCCAAACCTTCATC	0.000270244	NA		II			GTGACATTGATGTACCATAGCTCCAGGAAAGAGAGATGGCCAAGGAAAAAGTACATGGGA[CG]ATGAAGGCTTGGAGCAAGCCATATTGTGAAGACAATAAGTGCATTCTCCAACAATGTCAG	37	1	158533225	GAGAATGCACTTATTGTCTTCACAATATGGCTTGCTCCAAGCCTTCATCG	1	156799849	F			NA	NA	OR6P1	NM_001160325	1stExon					NA				NA
cg00160368	18681465	18681465	18681465	ATCCAAAAACAATACCRACAACTAATAACACACTTCCATTAAATACRCCC	0.00123	NA		II			GGGACCGGCCTGTCCAGGGGCAGTACCGGCAGCTGGTAACACACTTCCATTGAATACGCC[CG]CCCTGCCTCCGCGCGGCGCCCGCCCTGCCGCGGCCGCCGGCCCCTGCAGTGGGAGGGGGC	37	8	66753754	CGGGCGTATTCAATGGAAGTGTGTTACCAGCTGCCGGTACTGCCCCTGGA	8	66916308	R			NA	NA	PDE7A	NM_002604;NM_002604	1stExon;5'UTR	chr8:66753589-66754950	Island			NA	8:66915704-66917504			NA
cg00160462	14785481	14785481	14785481	CTTATTAAACTTTCRCTCTAACCTCACCTTTATATCTACRCTCCTTTATC	0.000404646	NA		II			TTTTCCTTTCGCTTATTAAACTTTCGCTCTAACCTCACCTTTGTGTCTGCGCTCCTTTAT[CG]TCTTGGAGGCAGGACAAAGAACTCCGGGCGTTATCTCAGACAAAGAAAGGCTGTTTAATC	37	6	28303629	TTATTAAACTTTCGCTCTAACCTCACCTTTGTGTCTGCGCTCCTTTATCG	6	28411608	R			NA	NA	ZNF323	NM_001135216;NM_001135215;NR_024164;NM_001135216;NM_030899;NM_145909;NR_024165	1stExon;5'UTR;Body;5'UTR;5'UTR;5'UTR;Body					NA	6:28411426-28412229	6:28303123-28304184	Promoter_Associated	NA
cg00160886	35725342	35725342	35725342	TTCTTAAAACTTAATTTTCTTATTTACAAAATAAAACTAATACACACCTC	0.00551631	NA		II			GTTGTTTTCCTTTCTTGAGACTTGGTTTTCTTATTTGCAAAATGGGGCTAATACACACCT[CG]TCTATTTCATCAGGGTGTTTTGAGGGTCACAGGTGATAAAGTGTAAACGAGCCCTTTATA	37	3	157216105	CGAGGTGTGTATTAGCCCCATTTTGCAAATAAGAAAACCAAGTCTCAAGA	3	158698799	R			NA	NA	VEPH1	NM_001167911;NM_024621;NM_001167915;NM_001167916;NM_001167912	5'UTR;5'UTR;5'UTR;5'UTR;5'UTR					TRUE				NA
cg00161247	53808373	53808373	53808373	ATTTAACTTACTTAATACCAAATCCTATCTATACCCTAAAAATCTACCCC	1.07e-05	NA		II			AGCTTACGCCCGGGGGAGGAAGTGCGATTTGCAGCCACCTGCCCCTCAGTGCACTGGAAG[CG]GGGCAGACCTCCAGGGCACAGACAGGACTTGGCATCAAGCAAGCCAAATCCCGAGATGAA	37	9	140060986	CGGGGCAGACCTCCAGGGCACAGACAGGACTTGGCATCAAGCAAGCCAAA	9	139180807	F			NA	NA	GRIN1	NM_000832;NM_007327;NM_021569	Body;Body;Body	chr9:140061735-140064864	N_Shore			NA				NA
cg00161556	59668457	59668457	59668457	ACTAAACAAAACTTAAATACCAACTCCTCCAATACCCTCCACAAAAAATC	0.0076217	NA		II			TAGACCTTCAAGCTGGACAGGGCTTAAATGCCAGCTCCTCCAGTGCCCTCCACAAAGGGT[CG]TGGAGGTCAGGGGGGAGGTGCACTTCAAGTGGGAGGCTCTCGCCCACTCCCCCTCTAGCC	37	11	19138045	CGACCCTTTGTGGAGGGCACTGGAGGAGCTGGCATTTAAGCCCTGTCCAG	11	19094621	R			NA	NA	ZDHHC13	NM_001001483;NM_019028	TSS1500;TSS1500	chr11:19138497-19139216	N_Shore			NA		11:19137953-19139443	Promoter_Associated	NA
cg00161878	71725461	44692325	71725461	TCACATAATTATAAACATCAACCCCAAAACAATCAACCTCATAAAAAACA	0.00030846	44692325	TCACGTAATTATAAACGTCGACCCCGAAACAATCGACCTCGTAAAAAACG	I	C	Grn	CGGCCCAGCCTTGTCCCCCGGCCCAGCCGGATTCCAGAGCTGCAGCCCCGGCTGGTGCAG[CG]CCTTCTACGAGGCCGACTGCTTCGGGGCCGACGTCCACAACTACGTGAAGGACCTGGGGC	37	10	135015300	CGCCTTCTACGAGGCCGACTGCTTCGGGGCCGACGTCCACAACTACGTGA	10	134865290	F			NA	NA	KNDC1	NM_152643	Body	chr10:135014703-135015402	Island			NA	10:134864482-134865481			NA
cg00161955	24721411	24721411	24721411	ATACAAACTAATTAAAAAACCACAACTACTAAACACTTAAACCCTAACAC	8.97e-05	NA		II			CACGGCCAAAGGTACAGGCTGGTTAAGGGACCACAGCTACTGGACACTTGGACCCTGACA[CG]ATGGGGCAATGGAAAGACACTGGCATTGATTCTAATCTTTTATTCCTTGTTTGTAACACT	37	8	82608057	CGTGTCAGGGTCCAAGTGTCCAGTAGCTGTGGTCCCTTAACCAGCCTGTA	8	82770612	R			NA	NA	SLC10A5	NM_001010893	TSS1500					NA				NA
cg00162064	20618419	20618419	20618419	CAAAATAAACTCATAATACTCACCCACAATTTTAATAAAAAATAAACCAC	6.77e-06	NA		II			CCCCACTATATACCAGAGGTGGACACTTCAGACATATGTGTATTTTGGCATCTTTTATCA[CG]TGGTTTATTCCTTATTAAAACTGTGGGTGAGCATTATGAGCTCATTTTGCAGGTGGGAAA	37	1	44998151	CGTGGTTTATTCCTTATTAAAACTGTGGGTGAGCATTATGAGCTCATTTT	1	44770738	F			NA	NA	RNF220	NM_018150	Body					TRUE				NA
cg00162231	13621382	26683509	13621382	TCAAAACCCAATAAACACTACCCAAAACTACCATAATAAACAATATCACA	0.00153046	26683509	TCAAAACCCAATAAACACTACCCGAAACTACCGTAATAAACGATATCGCG	I	C	Grn	CTTGCTGCTTCGGGAACTGCGCTCCCCTTCTTGCTTTTGGTCTCTGCGTGTACTCCCCGG[CG]CGACACCGCTCACCACGGTAGCCTCGGGCAGTGCCCATTGGGTTCTGAGCACACGTCCCC	37	3	11035357	TCAGAACCCAATGGGCACTGCCCGAGGCTACCGTGGTGAGCGGTGTCGCG	3	11010357	F			NA	NA	SLC6A1	NM_003042	5'UTR	chr3:11034446-11035384	Island			NA	3:11009162-11010384			NA
cg00163006	66614425	66614425	66614425	TAATAAAAAACCTCAAACCCACRTCCAATCCAAAACCCAAATTCTCAAAC	0.0107089	NA		II			GTGACGAAGCAAAAAACTCCAGCTAGTCAGCCCCAGAGCGGTTCCCAAGCCCGGGGCAGG[CG]CCTGAGAATCTGGGCCCTGGACTGGACGTGGGCCTGAGGTTCCCTACCACCCTCTCCCCT	37	17	4417124	GGTAGGGAACCTCAGGCCCACGTCCAGTCCAGGGCCCAGATTCTCAGGCG	17	4363873	F			NA	NA	SPNS2	NM_001124758	Body					TRUE				NA
cg00163018	67659395	67659395	67659395	AATAATCTCTCATTTAAAAAAATATCRTCCAATATTTAAATCTTATCCTC	6.64e-06	NA		II			TAGAGCTTAAAGATAGTCTCTCATTTAAAGGGATATCGTCCAATGTTTAAGTCTTGTCCT[CG]TGTCTAATCTCAAGTGTGTCCTGGCAGTCCTCCCTTTACTAAGGCAGTTCCCTGTCTCGT	37	1	237413813	CGAGGACAAGACTTAAACATTGGACGATATCCCTTTAAATGAGAGACTAT	1	235480436	R			TRUE	NA	RYR2	NM_001035	Body					NA				NA
cg00163365	23722434	23722434	23722434	AAATAATTTAACCCATTTAAAAAAAACTATATTACCTTCTCAAAAACAAC	0.00200187	NA		II			TTTCTGGAATAAGGTAGTTTAGCCCATTTGAAAGAAGCTGTATTGCCTTCTCAAAAACAA[CG]AAAACCTACTATTGATCAATGAAGGTAACAAGATATAACTTCAACAAAGTAAAACAACGA	37	4	84203456	CGTTGTTTTTGAGAAGGCAATACAGCTTCTTTCAAATGGGCTAAACTACC	4	84422480	R			NA	NA	COQ2	NM_015697	Body	chr4:84205381-84206020	N_Shore			NA		4:84203169-84203606	Unclassified	NA
cg00163372	55721311	30656479	55721311	CCAACTCCAAAATCTAATCACACAAAACAAAAAAACTCCATTTTAACTCA	1.58e-08	30656479	CCAACTCCGAAATCTAATCACGCAAAACAAAAAAACTCCGTTTTAACTCG	I	T	Red	GGACACCGAGGAGAATGTCAAGAGGCGAACACACAACGTCTTGGAGCGCCAGAGGAGGAA[CG]AGCTAAAACGGAGCTTTTTTGCCCTGCGTGACCAGATCCCGGAGTTGGAAAACAATGAAA	37	8	128752988	CGAGCTAAAACGGAGCTTTTTTGCCCTGCGTGACCAGATCCCGGAGTTGG	8	128822170	F			NA	NA	MYC	NM_002467	Body	chr8:128747805-128751279	S_Shore			NA	8:128822116-128822282			NA
cg00163462	52758503	52758503	52758503	CAATAACTATACATTTAACAAATCACCTCAAATCCCCAAATTATTCTAAC	0.00638053	NA		II			TGAGAATTCACACCATGACACTGACGGGACTTATAATAGTGGTTCTAAAGCCTGCATGTG[CG]TCAGAATAATTTGGGGATTTGAGGTGACTTGTTAAATGTACAGTCACTGGGTAGCCCCCT	37	1	76723043	AGTGACTGTACATTTAACAAGTCACCTCAAATCCCCAAATTATTCTGACG	1	76495631	F			NA	NA	ST6GALNAC3	NM_152996;NM_001160011	Body;Body					TRUE				NA
cg00163510	33650364	33650364	33650364	AACTTCAACCTCATCACCAAACAATTAACTAACTTTATAATACAAAATCC	0.00855536	NA		II			TCTATGGCACAAGCTTCAACCTCATCACCAAACAATTAGCTAACTTTATAATACAAGGTC[CG]TAATGCTGCGGTATTACCACACCTACGGCTGTCAAACAGCCTTTTTAAAAAAGGAATCAT	37	1	214722952	CGGACCTTGTATTATAAAGTTAGCTAATTGTTTGGTGATGAGGTTGAAGC	1	212789575	R			NA	NA	PTPN14	NM_005401	5'UTR	chr1:214724104-214725056	N_Shore			NA				NA
cg00163702	59703408	59703408	59703408	AATTCAAATTTCCTAACTTTATATACAAAACTTTATATAATCTAACCTCC	0.0312661	NA		II			TCCATGGATCAAGTTCAAATTTCCTAGCTTTGTATACAAGGCTTTGTATGGTCTGGCCTC[CG]AGAGTATTTCCAAACACATCCTCCCAAATGTGGAGAAACAAGCTGTCTCTCTGCTTGCTG	37	16	81254719	CGGAGGCCAGACCATACAAAGCCTTGTATACAAAGCTAGGAAATTTGAAC	16	79812220	R			NA	NA	PKD1L2	NM_052892;NM_001076780	TSS1500;TSS1500					NA				NA
cg00164217	56665471	56665471	56665471	TCCAAATATCCACTTAAAACCTAATATTTACCTAAAATATAAAAATTCAC	0.000914327	NA		II			TCCACCTGGGGTCCAGGTATCCACTTAGGACCTGATGTTTACCTGGAGTGTAGGAATTCA[CG]TGGGGCCTGGTGTCCACCTTGAGTGTGTGTATCCAACTGAGTGCTGGTGTCCACCTGGAG	37	2	132556040	CCAGGTATCCACTTAGGACCTGATGTTTACCTGGAGTGTAGGAATTCACG	2	132272510	R			NA	NA	C2orf27B	NM_214461	Body	chr2:132558959-132559614	N_Shelf			NA				NA
cg00164282	28606454	28606454	28606454	TAAATACATTAAATACTTCATAAAAAACTCTAAAATCACAAAAACAAACC	0.0152439	NA		II			CAAAGTGATAGTAAATGCATTAAGTGCTTCATGAGAAACTCTAGAGTCACAGAGACAGGC[CG]TCCTCCATCTGGATGTCACTAGGACATAATGCATGCTCTCTGGCTCACACTGAGGACAAC	37	17	30830732	CGGCCTGTCTCTGTGACTCTAGAGTTTCTCATGAAGCACTTAATGCATTT	17	27854845	R			NA	NA	MYO1D	NM_015194	Body					TRUE		17:30830154-30831249	Promoter_Associated	NA
cg00164678	40799483	40799483	40799483	AAATATCTACATTAAACAAAAACACCATATCCTAACCTCAATCAAAAACC	9.62e-07	NA		II			TCATTGGAGGCTCAATCTTTGTCAATGTCACCATGTTCTCCTCAGGTGCCACCCTCACCC[CG]GCCCCTGACTGAGGTCAGGACATGGTGTTCTTGCCCAATGCAGACACTCCACCCATGTGA	37	19	10152171	CGGCCCCTGACTGAGGTCAGGACATGGTGTTCTTGCCCAATGCAGACACT	19	10013171	F			NA	NA	C3P1	NR_027300	Body					NA				NA
cg00164949	54639505	45668499	54639505	CAACAAACCAATAAAAAAACCTAACTATAACCCAAACAATATTAAACACA	0.000820508	45668499	CAACGAACCGATAAAAAAACCTAACTATAACCCAAACGATATTAAACACG	I	A	Red	GGCCCGGCTCTGCAGCGAGCCGGTGGGAGGGCCTAGCTGTGGCCCAGGCGGTGTTGAGCA[CG]GGCCGGGGGCGTCATAGCCGGGGAGGGCCGGGCAGCGAGCGGGTGGGCGAGGGGCGAGTC	37	17	43037427	CAGCGAGCCGGTGGGAGGGCCTAGCTGTGGCCCAGGCGGTGTTGAGCACG	17	40392953	R			NA	NA	C1QL1	NM_006688	3'UTR	chr17:43037166-43037740	Island		DMR	TRUE	17:40392693-40393235			NA
cg00165121	39660326	39660326	39660326	CCTTAAAACRATTTAACCATCCACAAAACCCAATTAACTTATAAATACCC	0.000376903	NA		II			GGGCCGAGTGGCCTTGGAACGGTTTGACCATCCACAGAGCCCAGTTGGCTTGTAGGTGCC[CG]TGGACAATTTTGTATTAGCAAATCCAGTAAGACTATGGTTATTCTTGGTGGCGGAAACCC	37	1	213152123	CGGGCACCTACAAGCCAACTGGGCTCTGTGGATGGTCAAACCGTTCCAAG	1	211218746	R			NA	NA	VASH2	NM_024749;NM_001136475;NM_001136474	Body;Body;Body					TRUE				NA
cg00165862	31623396	31623396	31623396	CTACCATTCRATAATAAAAATCATACCRCACTCAACCTAAAAAACTTTCC	0.00451245	NA		II			TCCCACTTACTCTGCCATTCGGTGATGGAGATCATGCCGCACTCAGCCTGGGGGGCTTTC[CG]GGTGGAAGCGGGCAAGTGGAGCGTGGCCCAGAGGACGCAGCTGGTACATGGTCACGGGAA	37	1	204183060	TGCCATTCGGTGATGGAGATCATGCCGCACTCAGCCTGGGGGGCTTTCCG	1	202449683	R			NA	NA	GOLT1A	NM_198447;NM_198447	5'UTR;1stExon					TRUE		1:204182920-204183831	Unclassified	TRUE
cg00166216	11762473	41771329	11762473	ACAACTACACCAACCTTACTATAAACAAAATCTAAAACAAAAACAAAACA	4.03e-07	41771329	ACGACTACACCGACCTTACTATAAACAAAATCTAAAACAAAAACGAAACG	I	A	Red	AGGCGCGCGGCGACGGCTGCACCGACCTTGCTGTGGGCAAGATCTGGAGCAAGAGCGAGG[CG]GGCCGTCAGGGCACCAAGATGAAGCTGACGGTGAGTGCGCAGGGTATCCGCATGGTGCAC	37	3	194407860	ACGGCTGCACCGACCTTGCTGTGGGCAAGATCTGGAGCAAGAGCGAGGCG	3	195889149	R			NA	NA	FAM43A	NM_153690	1stExon	chr3:194406440-194409045	Island		DMR	NA	3:195887730-195890297			NA
cg00166722	55760432	14676335	55760432	ACCTACTAAACTCTAAAAATCTCACACTCCAAAATAACAACCACTATTCA	0.0301546	14676335	ACCTACTAAACTCTAAAAATCTCACGCTCCAAAATAACGACCGCTATTCG	I	T	Red	GGCCCGGGGCTCACCTGCTGAACTCTGAGGGTCTCACGCTCCAAAGTGGCGGCCGCTGTT[CG]TGGCGCCTGGCAACCGCCTTTGTGACCCAGGACGGCAGGGCAGCCCGAGCCGCGGCGGGG	37	3	10149974	ACCTGCTGAACTCTGAGGGTCTCACGCTCCAAAGTGGCGGCCGCTGTTCG	3	10124974	R			NA	NA	C3orf24	NM_001164839;NM_173472	TSS200;TSS200	chr3:10149750-10150066	Island			NA	3:10124751-10125032			NA
cg00166915	10621489	10621489	10621489	ATAAAAAACCCTATTAATCTAACTTTAAAAAAAACCAACCTTCCAAACTC	0.000398254	NA		II			GGCTTGGAGGGGTGAGGGGCCCTGTTAGTCTGACTTTGAAGAAGACCAGCCTTCCAGACT[CG]CTTGGTGCCCTGACAGGTATGTGTGCTCTTCTCTCTCCCACCTAACAGCCCCTTTTGGGA	37	14	101361359	TGAGGGGCCCTGTTAGTCTGACTTTGAAGAAGACCAGCCTTCCAGACTCG	14	100431112	R			NA	NA	MEG8	NR_024149	Body					NA				NA
cg00167259	14641456	14641456	14641456	AAACATTTACTCTCTCTTTAATTCCCACTCCCATAATAACTACCTTTACC	0.0156833	NA		II			ATTTCTATGGAAAATTGGATTTTTAAATAAAATACCCACAATATCTTGAAAATGCACACA[CG]GCAAAGGCAGTCACTATGGGAGTGGGAACTAAAGAGAGAGCAAATGCCTCTGATGAAGAT	37	1	166590947	CGGCAAAGGCAGTCACTATGGGAGTGGGAACTAAAGAGAGAGCAAATGCC	1	164857571	F			NA	NA	FMO9P	NR_002925	Body					NA				NA
cg00167491	16681391	16681391	16681391	ACTAAAACACAATATATCAATATCCATTTCCACATTATACTAAAACTCTC	0.0273427	NA		II			GGTGGGGAAAGGCTGAGGCACAATGTGTCAGTATCCATTTCCACATTGTACTGAAACTCT[CG]GCACTGGAAATTGTCTCATCAGAAGGAACATACTGGAAGGGTAAGACCCGATGCAAGGCA	37	5	44388799	CTGAGGCACAATGTGTCAGTATCCATTTCCACATTGTACTGAAACTCTCG	5	44424556	R			NA	NA	FGF10	NM_004465	TSS200					NA	5:44424556-44424849			NA
cg00167763	53671349	53671349	53671349	AATTAACTTAAAATCACACAACAAATCAACCATACTAAAACTTAACCCCC	0.00173346	NA		II			GGAAGTTAGGAAGTTGGCTTAAGGTCACACAGCAAGTCAGCCATGCTGGGGCTTGACCCC[CG]TCCAGATCTGGGCGGGCCTGGCTCAGAGTATGCGGCGTCCTGAAACTTGGCATCTGGTGC	37	22	43819240	CGGGGGTCAAGCCCCAGCATGGCTGACTTGCTGTGTGACCTTAAGCCAAC	22	42149184	R			NA	NA	MPPED1	NM_001044370	5'UTR	chr22:43820887-43821136	N_Shore			NA				NA
cg00167783	65692390	65692390	65692390	TAACATCAACATCTATTATTTTCATCAAACATTATACACTATTAATAATC	0.00157158	NA		II			ACATAAAACAATAACATCAGCATCTATTATTTTCATCAAGCATTATGCACTGTTGATAAT[CG]TATGTTCACACCCACATCACCACAAACATGTAAGCTCTGTGGTGTCCAATGAATCTGCCT	37	17	14141486	AACATCAGCATCTATTATTTTCATCAAGCATTATGCACTGTTGATAATCG	17	14082211	R			NA	NA	CDRT15	NM_001007530	TSS1500					NA				NA
cg00168009	43756477	12626387	43756477	AATTTCAAAAACACTAAACTAAAAAACAATCAACAAAACTACAACAAACA	0.0248837	12626387	AATTTCGAAAACACTAAACTAAAAAACAATCGACGAAACTACGACGAACG	I	A	Red	CCCGCCTTGTCCAAAGGGCTCATCAAAGCCGGTTTACCGGCGGCCCAGGAAGGAAATGAC[CG]CCCGCCGCAGCCCCGCCGACTGCCTTTCAGTTCAGTGCTTTCGAAACCACAAGGGCGGGC	37	3	194980766	CGCCCGCCGCAGCCCCGCCGACTGCCTTTCAGTTCAGTGCTTTCGAAACC	3	196462055	F			NA	NA	C3orf21	NM_152531	Body	chr3:194980332-194981275	Island			TRUE	3:196461622-196462688	3:194980250-194981229	Promoter_Associated	NA
cg00168118	74657484	74657484	74657484	AACCTAAATACCAAAAACCRCTAATCCCCACTAACCAAAAACAAAATACC	0.015031	NA		II			GGCCAGCGGGTGGCCTGAGTGCCAGAGGCCGCTGGTCCCCACTGGCCAGGAACAAAGTGC[CG]CTGGGCGCCCCTGGCGGGAGGCCAGACACCATGGCCTCGTGGCCCTGCTCCCTCCCAGCT	37	16	85669675	CGGCACTTTGTTCCTGGCCAGTGGGGACCAGCGGCCTCTGGCACTCAGGC	16	84227176	R			NA	NA	KIAA0182	NM_001134473;NM_014615	5'UTR;Body	chr16:85670134-85670349	N_Shore			NA	16:84227021-84227193	16:85669381-85669793	Unclassified	TRUE
cg00168191	33606483	33606483	33606483	CTACCCTAACTCCTAAATTTACAACCAAATAAAACATATTCTAAAAAAAC	3.67e-11	NA		II			GCTCCAGGGCCCTGCCCTGACTCCTGGGTTTGCAACCAGGTGGAGCATGTTCTGGAAGAA[CG]CCGCGTCTGCTCGCTCTCATCCACTGCCTCCCTGGGGCTGCACACGGCCTGTGAGGTCGG	37	19	3097565	TGCCCTGACTCCTGGGTTTGCAACCAGGTGGAGCATGTTCTGGAAGAACG	19	3048565	R			NA	NA	GNA11	NM_002067	Body	chr19:3097564-3097793	Island			TRUE				NA
cg00168240	55767399	55767399	55767399	CAATCAATCTCCTCCTACATCATTTCAAAACRAACATACAAATCRTAAAC	0.00311468	NA		II			ACACCCAAACTCAGTCAATCTCCTCCTGCATCATTTCAGGGCGGACATGCAGATCGTGGA[CG]GCAGTGCCCAGTGTCCAGGCCTAGCCAGTGAGAAGCAGGAGGACGTGGAGGAGGAGGACG	37	1	3347457	AGTCAATCTCCTCCTGCATCATTTCAGGGCGGACATGCAGATCGTGGACG	1	3337317	R			NA	NA	PRDM16	NM_022114;NM_199454	Body;Body	chr1:3351365-3351632	N_Shelf			NA	1:3337298-3337471	1:3347430-3348567	Unclassified	NA
cg00168439	34623458	34623458	34623458	CATCTTCCTAAAACTAATACTTCTCTTAATATTATAATCTCAATATTTAC	0.0138858	NA		II			TATCCACTCCTCATCTTCCTAAAACTGATGCTTCTCTTAGTGTTATGGTCTCAATGTTTA[CG]TACCCCCACAATTCATATGTTGAAATCTTAACCCCCAAGATGATGGCATTAAGGGGTGAG	37	3	55926920	ATCTTCCTAAAACTGATGCTTCTCTTAGTGTTATGGTCTCAATGTTTACG	3	55901960	R			NA	NA	ERC2	NM_015576	Body					TRUE				NA
cg00168694	19810489	19810489	19810489	TAAACAATTTACACATAATCATTTAACAAAAAAATAACATAAAATCCCAC	0.0118782	NA		II			CGGGCTCACATTAAGCAATTTACACATGGTCATTTGGCAGGAAGGTGGCATGGGATCCCA[CG]TATGACACGCCTCATTCTGTGATGAAACACCCCCTCAGCCACCCCCATCTCTGCCCCACT	37	21	40193056	CGTGGGATCCCATGCCACCTTCCTGCCAAATGACCATGTGTAAATTGCTT	21	39114926	R			NA	NA	ETS2	NM_005239	Body	chr21:40194644-40194849	N_Shore			NA				NA
cg00169019	21670307	21670307	21670307	CAAAACTCACAAACTCCTCTAAATACTTCTAACAAATATATAACAATCTC	0.0236863	NA		II			ATCTGAGGGCTCTGTCTCCCCAGTGGCCTCAGGACAGAGCAAGGCCCCCAGCAGGTGCCT[CG]AGACTGCCACACACCTGCCAGAAGCATTCAGAGGAGTCTGTGAGCCCTGAGCCTGGGCTC	37	6	32056438	AGGGCTCACAGACTCCTCTGAATGCTTCTGGCAGGTGTGTGGCAGTCTCG	6	32164416	F			NA	NA	TNXB	NM_019105	Body	chr6:32055067-32055601	S_Shore			NA				NA
cg00169122	22710377	22710377	22710377	RACTATAAATCAATAATAAACACACTTTTCAATATATCAAATAATAACAC	0.0243095	NA		II			CTAACAGGTGCGACTATGGGTCAGTAATAAACACACTTTTCAATATGTCAAGTAATAACA[CG]ATATTCGCGCTGACCCAATCGCACCCCACCTCTTTCAACGCCCTGGGCTCTCCCCTCGCT	37	16	89488963	CGTGTTATTACTTGACATATTGAAAAGTGTGTTTATTACTGACCCATAGT	16	88016464	R			NA	NA	ANKRD11	NM_013275	5'UTR	chr16:89487760-89488158	S_Shore			TRUE	16:88016464-88016590	16:89488834-89489682	Promoter_Associated_Cell_type_specific	NA
cg00169175	52652310	25726378	52652310	CAACACAAACACAAAACTAAATATACAAAAAACCACACAACAACTAAACA	0.0162145	25726378	CAACGCGAACGCAAAACTAAATATACGAAAAACCACGCAACGACTAAACG	I	T	Red	CCCAGGCCACGCCAACGCGGGCGCAGGGCTGAGTATGCGGGAAGCCACGCAGCGACTGGG[CG]TACTCCTAAGCTTCTGGAAAGGCATTCTCACGCCCTGCTCCTCCTACCCTCCTCCAAAGT	37	6	105307915	CGCCCAGTCGCTGCGTGGCTTCCCGCATACTCAGCCCTGCGCCCGCGTTG	6	105414608	R			NA	NA	HACE1	NM_020771	TSS200	chr6:105307119-105307916	Island			NA	6:105413813-105414609	6:105306787-105308417	Promoter_Associated	NA
cg00169305	74754497	66711437	74754497	AAAAAAATTCCTCCTAAACTAACCCAAAAACAAAATCCAAACCACAACCA	0.019605	66711437	AAAAAAATTCCTCCTAAACTAACCCGAAAACGAAATCCAAACCACAACCG	I	A	Red	CTCCGAGGGGCTCAACCGCCTCCAGGGGGAGCCGCACATGGAGCCTGTGCCGCCGCCGGC[CG]GTTGTGGCCTGGACCCCGCTCCCGGGTTAGCCCAGGAGGAATTCCCCCTGCAAGTCCGAA	37	4	141348932	GGGGGAATTCCTCCTGGGCTAACCCGGGAGCGGGGTCCAGGCCACAACCG	4	141568382	F			NA	NA	CLGN	NM_004362;NM_001130675	TSS200;TSS200	chr4:141348042-141348957	Island			NA	4:141567493-141568483	4:141347845-141349294	Promoter_Associated	TRUE
cg00169792	70676412	70676412	70676412	TAAATTTCACCCCCAACTTTCTCCCCTAATTATAAAATTAACCCCCACTC	8.18e-05	NA		II			AATTAAGTGAGGGGCAGAGGACAAGGAGAAGGGAACCTTTCGGGAGCGAGAACAGAGGAG[CG]AGTGGGGGTCAATTTTACAATTAGGGGAGAAAGCTGGGGGTGAAACTTACACAAGAGGGG	37	20	50418554	AAGTTTCACCCCCAGCTTTCTCCCCTAATTGTAAAATTGACCCCCACTCG	20	49851961	F			NA	NA	SALL4	NM_020436	Body	chr20:50417312-50419045	Island			NA	20:49850919-49852452	20:50418441-50418742	Unclassified_Cell_type_specific	NA
cg00169930	12707357	12707357	12707357	CACTATATCCCCTAAATATAAACTAAAATCACCCTTAAAAAACCTTTACC	0.012603	NA		II			CCCACGTCGTCCACTGTGTCCCCTGGGTGTGAACTAAGGTCACCCTTAGGGGGCCTTTGC[CG]AGAGTCTGTTTGCTTTTCCCTGGAACCTGCGAGGTTCTGGCCAGCTCTTGCTGGCCATCC	37	4	736398	CGGCAAAGGCCCCCTAAGGGTGACCTTAGTTCACACCCAGGGGACACAGT	4	726398	R			NA	NA	PCGF3	NM_006315	Body	chr4:738424-741517	N_Shelf			NA	4:726328-726430	4:735801-737091	Unclassified	NA
cg00170295	18646437	18646437	18646437	TATATTACTAAATTCCCATCACAAAACTCCAAAATAACATTCCTACACAC	0.00649975	NA		II			AGTTGTAGCATCTTAAGCAAGTTATTTGATATCTCTGGGCCTGTTTATTCACCTAAATAA[CG]TGTGCAGGAATGCCACCTTGGAGCCCTGTGATGGGAATTCAGTAATATAATGAGTGTACA	37	6	46720370	CGTGTGCAGGAATGCCACCTTGGAGCCCTGTGATGGGAATTCAGTAATAT	6	46828329	F			NA	NA	LOC100287718	NM_001162435	Body					NA				NA
cg00170438	20807313	20807313	20807313	TACACACACAACTATTTCTAACATAATACATCCTAATCCTACAAAAACCC	0.023399	NA		II			CCCAGACCACGTGCACACACAGCTGTTTCTGACATGATGCATCCTGATCCTGCAAAGGCC[CG]AGCCATCTGCAGAGGTTGGGGTGGGAGGTCCAGCCCCACTCCTGCACAGGTGCTCGCACC	37	20	60792389	CGGGCCTTTGCAGGATCAGGATGCATCATGTCAGAAACAGCTGTGTGTGC	20	60225784	R			NA	NA	HRH3	NM_007232	Body	chr20:60794179-60796121	N_Shore			NA				NA
cg00170487	42654481	42654481	42654481	ACTTCCCAAATACTTACTCTCTCAAAACTAAACCATTCAAAAACAAAATC	0.0250513	NA		II			GGGATCCCATGTGCAGATTCCACTGCTCTGAATGATTCCAAAACACCACCCAACCCGACC[CG]ACTTTGTTTCTGAATGGCCCAGCTTTGAGAGAGCAAGCATTTGGGAAGTGAGATAAGCTA	37	4	153871345	CTTCCCAAATGCTTGCTCTCTCAAAGCTGGGCCATTCAGAAACAAAGTCG	4	154090795	F			NA	NA	FHDC1	NM_033393	Body					TRUE				NA
cg00171092	47771303	47771303	47771303	AAAACTAACCTCATATTACACCCAAAAAAACCTCTTTTCAATATAAAAAC	0.022307	NA		II			ACCACAGCTTCTGAAGTCACCCTCCACATGCAGCTCCAGTGCTTTCCAACTCATTCTGTT[CG]CTCCCACACTGAAAAGAGGCCTTTCTGGGTGCAACATGAGGCCAGCCCCCTCTGCACGTG	37	3	124531371	CGCTCCCACACTGAAAAGAGGCCTTTCTGGGTGCAACATGAGGCCAGCCC	3	126014061	F			NA	NA	ITGB5	NM_002213	Body					TRUE				TRUE
cg00171192	48624491	48624491	48624491	RCTCCCTACTTTCRAACCCTAACTTCTAAATAAACATCTAAACCCRAATC	0.0242575	NA		II			CCTTCTCGGCCGCTCCCTGCTTTCGGGCCCTGACTTCTAAGTGGGCATCTGGGCCCGAGT[CG]TCAGCGTCGGGGCGGTTGTGGGATCCTGGCCTCGGCAGCGTCCACACCCCCGCCGGGAAG	37	22	17518345	CGACTCGGGCCCAGATGCCCACTTAGAAGTCAGGGCCCGAAAGCAGGGAG	22	15898345	R			NA	NA	CECR7	NR_015352	Body	chr22:17516913-17518500	Island			NA	22:15897329-15898465			TRUE
cg00171729	55784400	55784400	55784400	TATAACCCAAAACCTACTTATCAACACRTAACTAAAATTTCCRTATTAAC	0.000545235	NA		II			GAAGGCTCAGCGTGATCAGACAACACGGACACTTGATCTTCTGAGATCCCAATTTGGGAA[CG]TTAACACGGAAACCCTAGCCACGTGCTGACAAGCAGGCCCTGGGCCACATTCTGCCCCAG	37	6	52416856	GTGGCCCAGGGCCTGCTTGTCAGCACGTGGCTAGGGTTTCCGTGTTAACG	6	52524815	F			NA	NA	TRAM2	NM_012288	Body					TRUE		6:52416465-52417014	Unclassified_Cell_type_specific	NA
cg00172849	26801322	26801322	26801322	CAAATTTTTACACAAAAATAAAATTACCRCTACCAACCCAAAACTCCAAC	0.0158508	NA		II			CTGTTAGCCTCTCGCTGGTCGGCGGGAGAGGGGAGGAGGCCAGCGCCTGATCGGCCACAC[CG]CTGGAGTCCTGGGCTGGCAGCGGTAACCTTATCCTTGTGCAAAAATCTGCTTCGTATGGC	37	1	103574532	CGCTGGAGTCCTGGGCTGGCAGCGGTAACCTTATCCTTGTGCAAAAATCT	1	103347120	F			NA	NA	COL11A1	NM_001168249;NM_080629;NM_080630;NM_001854	TSS1500;TSS1500;TSS1500;TSS1500					TRUE	1:103346256-103347121			NA
cg00173098	16682509	16682509	16682509	AACCTAACATATAAATACTCACTAAATATATACTACTTTTACTAAATCAC	0.000165306	NA		II			AAGAAGGCAGTAAGAATGGCTGGGGTGGAAGACACTCTTTATTCTCATTTTATGAAGAAA[CG]TGATCTAGTAAAAGTAGCACACATTTAGTGAGCATTTACATGCCAGGTTGTTCTGAGCAT	37	20	1445335	CGTGATCTAGTAAAAGTAGCACACATTTAGTGAGCATTTACATGCCAGGT	20	1393335	F			NA	NA	NSFL1C	NM_182483;NM_016143;NM_018839	5'UTR;Body;Body	chr20:1446936-1447729	N_Shore			NA				NA
cg00173170	54643443	54643443	54643443	ACTAACTATAAAACTCRATATCRTTATACCTAATACCCTCCACCCACAAC	0.0174114	NA		II			GCCCTCCAGGTACTGGCTGTAGAGCTCGATGTCGTTGTGCCTGGTGCCCTCCACCCACAG[CG]GCTCCACCGCCTTGGGGCAGCGCTCGTAGAGCGCCAGCCCGTGCGAGAAGTCGATCACCT	37	1	214779122	CTGGCTGTAGAGCTCGATGTCGTTGTGCCTGGTGCCCTCCACCCACAGCG	1	212845745	R			NA	NA	CENPF	NM_016343	5'UTR	chr1:214778908-214779709	Island			NA	1:212845532-212846281			NA
cg00173538	16711471	16711471	16711471	TTTAAATAACTCTTACTAAAACAAATAATACCAAAAAACAAAAACTCAAC	5.39e-06	NA		II			TGTAAAACTGTTTTAAATAACTCTTGCTAAAGCAGATAGTACCAGAGAGCAGAAACTCAG[CG]CCCAGGTCCTTAATGGTTCCTTCTCTCTACCCTCCTTCCCCTCCCACCCCCCACGTGTAA	37	6	42071219	TTAAATAACTCTTGCTAAAGCAGATAGTACCAGAGAGCAGAAACTCAGCG	6	42179197	R			NA	NA	C6orf132	NM_001164446	3'UTR	chr6:42072032-42072701	N_Shore			NA				NA
cg00173799	68620486	68620486	68620486	CATAATAATCCCCTTACAATTACCATATTATATCCTACCATTTAATACCC	0.00475079	NA		II			AAGTTAGGCAGATAGAGGAAAGGTAAAGAGAATTCTGGGAAGCAGGTATAGAATGTTCAC[CG]GGCATCAAATGGCAGGATATAATATGGCAACTGCAAGGGGACCATTATGAATAGAACAGG	37	11	101001711	CGGGCATCAAATGGCAGGATATAATATGGCAACTGCAAGGGGACCATTAT	11	100506921	F			NA	NA	PGR	NM_000926	TSS1500	chr11:100998030-100999774	S_Shore			NA				NA
cg00174093	51732434	51732434	51732434	CCTATTCCCTTAAAAATACTCAACTATAAAATCCCTAAAAATAATTATCC	0.000356282	NA		II			ACTGTGGAGGCATCTCGGAGCATCAAGTTCTTTATGGAGGACTTCACTGTGATGTTGGCC[CG]GACAATCACTTCCAGGGACTTCACAGCTGAGTACTCCTAAGGGAACAGGGAAGGAGACCC	37	12	56082047	CTGTTCCCTTAGGAGTACTCAGCTGTGAAGTCCCTGGAAGTGATTGTCCG	12	54368314	F			NA	NA	ITGA7	NM_001144996;NM_001144997;NM_002206	Body;Body;Body					NA				NA
cg00174713	63651397	63651397	63651397	AAAAAAATTATATCCTCCTACAACTTAAAATTTTTACTAATCTATTCAAC	0.00158248	NA		II			TTTCTCCAGGAGAGGGAATTATATCCTCCTGCAACTTGAGGTTTTTGCTGATCTGTTCAG[CG]TGGTAATACATCTAAGGGATGTTTAGTCCCCACTTCAAACATAAATAGCTATTCCTGATA	37	3	65538667	CGCTGAACAGATCAGCAAAAACCTCAAGTTGCAGGAGGATATAATTCCCT	3	65513707	R			NA	NA	MAGI1	NM_015520;NM_001033057;NM_004742	Body;Body;Body	chr3:65534684-65535344	S_Shelf			NA				NA
cg00174743	49740300	49740300	49740300	CRTATTAACATCTAAATCCCACAAACTTATAATTCTTTAACCCAAAAAAC	0.0120372	NA		II			CCTGTGGTGCTCGTGTTGACATCTGGGTCCCACAAGCTTATAATTCTTTGGCCCAGGGGG[CG]TTTTCCAGGGTGGAAGACATTGGTCCCACGGGATGTTTTAAACTCTGCCTATGACTGTGC	37	21	47812611	CGCCCCCTGGGCCAAAGAATTATAAGCTTGTGGGACCCAGATGTCAACAC	21	46637039	R			NA	NA	PCNT	NM_006031	Body	chr21:47813251-47813462	N_Shore			NA				NA
cg00174851	42772488	42772488	42772488	ATCATTTTTCATATCCTATAATATTTCATATCCTATTATCATTCTCATCC	0.00707638	NA		II			CATATCATATTATCATTTTTCATATCCTATGATGTTTCATGTCCTATTGTCATTCTCATC[CG]GCTAGGCACTTCTCGGGGACGCTGTGTGGTGTTGAGGTTTTACAGGGAAAATGCTAACCT	37	7	134142981	TCATTTTTCATATCCTATGATGTTTCATGTCCTATTGTCATTCTCATCCG	7	133793521	R			NA	NA	AKR1B1	NM_001628	Body	chr7:134143115-134144063	N_Shore		CDMR	NA		7:134142875-134144626	Promoter_Associated	NA
cg00175579	12665400	12665400	12665400	ATAATAACTAAAAACRACTACAAATACCCAAAAAAACTAACAAAACCATC	0.000206265	NA		II			CATGCTGCTCAGTGGTGACTGGGGGCGGCTGCAAGTGCCCAGAGAGGCTGACAGAGCCAT[CG]GAATGGTGGCGCAGGGCCGAGAGCCACCTCTGCCCCTCGGCCTTCTGAGAGCGGCCCCCT	37	6	33272215	TGGTGACTGGGGGCGGCTGCAAGTGCCCAGAGAGGCTGACAGAGCCATCG	6	33380193	R			NA	NA	TAPBP	NM_172209;NM_003190;NM_172208	Body;Body;Body					NA				NA
cg00175641	11694375	11694375	11694375	TCACCCTACACTCCAACTTACTCCATCTCTAAATTTAAATTAATCTTTCC	0.0110031	NA		II			TCACTTTCTAATCACCCTACACTCCAACTTACTCCATCTCTGGGTTTGAGTTAGTCTTTC[CG]AAGTCCCATTTTAAGAGTCTAAGGATTTATTAAAACACACTCCATTATCATAGTTCTGAT	37	4	81310511	CGGAAAGACTAACTCAAACCCAGAGATGGAGTAAGTTGGAGTGTAGGGTG	4	81529535	R			NA	NA	C4orf22	NM_152770	Body	chr4:81307471-81307952	S_Shelf			NA				NA
cg00175702	69644478	69644478	69644478	AACCACACTTCTTCCTAAAAACCTCAAAAACTAATAAATAACAAAAAAAC	0.00147888	NA		II			CTGCCTCTGCCACCGACCGCCGGCCCTGCCTCTGCCACCGACCGCCGACCCTGCCTCTGC[CG]TTTCCTTGCCACCCATCAGCTCTTGAGGCTTTTAGGAAGAAGTGTGGCTGTTTTGGCCAG	37	1	2109388	GCCACACTTCTTCCTAAAAGCCTCAAGAGCTGATGGGTGGCAAGGAAACG	1	2099248	F			NA	NA	PRKCZ	NM_001033581;NM_001033582;NM_002744	Body;Body;Body					NA	1:2098589-2099249			NA
cg00175735	21623384	21623384	21623384	AAAATATTCACTACCATCTCCTCACACAAAACTATTTAATACCAACAACC	0.00429355	NA		II			AATGTTAACTAGAAGTGTTCACTGCCATCTCCTCACACAAGGCTGTTTGATACCAACAAC[CG]TACTAGTTGCCACCTCCAAATTAGATTCAAATGTCATGCTGAAAATTTCCCGTTGGTATT	37	3	99903386	CGGTTGTTGGTATCAAACAGCCTTGTGTGAGGAGATGGCAGTGAACACTT	3	101386076	R			NA	NA	TMEM30C	NR_028358;NR_028357	TSS1500;TSS1500					TRUE				NA
cg00176210	55696349	55696349	55696349	AAACRAATAAAATATACAAAACTACTCTTACTCRCRTACTACCTACTAAC	0.0013802	NA		II			ACGGGGAGGCGAGGCGGGTGGGGTGTGCAAAGCTGCTCTTGCTCGCGTGCTGCCTACTGG[CG]CGGCCTGGGTGGCCCCCTCCTGACATCTCCCCGTCCACCCGAGCAGCCGCCCAGTACTCA	37	8	41654967	GGCGGGTGGGGTGTGCAAAGCTGCTCTTGCTCGCGTGCTGCCTACTGGCG	8	41774124	R			NA	TRUE	ANK1	NM_020476;NM_020475;NM_001142446;NM_020477;NM_000037	Body;Body;Body;Body;Body	chr8:41654875-41655984	Island			NA	8:41773992-41774638	8:41654959-41655898	Unclassified_Cell_type_specific	TRUE
cg00176496	74788360	74788360	74788360	AACTACCCTCAATATCRCTAATAAACCCTAAAACTCCCTAAATACTAAAC	0.00105082	NA		II			TCCACTGAGGCATCCACCTCATCGGCGGGCCTCCCTGTCCTCCTAGAACAGGGACTGGAC[CG]TCCAGCATCCAGGGAGCCCTAGGGTTCATTAGCGACACTGAGGGCAGCCATGGGGTTCTG	37	17	6376716	GCTGCCCTCAGTGTCGCTAATGAACCCTAGGGCTCCCTGGATGCTGGACG	17	6317440	F			NA	NA	PITPNM3	NM_031220;NM_001165966	Body;Body					NA		17:6376012-6377009	Unclassified	NA
cg00176888	61768358	17651399	61768358	AAAAACAAATCTAACACCATACTAAATCACCACCCACAAAACCCAAAACA	0.000862373	17651399	AAAAACAAATCTAACGCCATACTAAATCACCGCCCACAAAACCCAAAACG	I	A	Red	CCCAGCCCTCCTTGTGGCTTCCTAAGATCCCCCCAACCCTGCCAGGGCCCCCCGAGGGCC[CG]CCCTGGGCCTTGTGGGCGGTGACTCAGCATGGCGCCAGACTTGCCTCCTCTACCTCCCTC	37	17	56408804	GGAGGCAAGTCTGGCGCCATGCTGAGTCACCGCCCACAAGGCCCAGGGCG	17	53763803	F			NA	NA	MIR142	NR_029683	TSS200					TRUE		17:56408735-56409060	Promoter_Associated	NA
cg00177239	35780343	35780343	35780343	ATTAAATAATAATATATTTTAAAATTAACAAAACCATTTCACCTACAATC	0.018802	NA		II			CCTGTTTCAATGTTGAATAATAATATATTTTAAAGTTAGCAAAGCCATTTCACCTGCAGT[CG]TTGATTTCTTCAAAATCTGAGCATTTAAATCCATTGCCAATGTTTGCTTAAAGAACACTG	37	10	116581112	CGACTGCAGGTGAAATGGCTTTGCTAACTTTAAAATATATTATTATTCAA	10	116571102	R			NA	NA	FAM160B1	NM_020940;NM_001135051	TSS1500;TSS1500	chr10:116581522-116582434	N_Shore			NA		10:116580798-116582452	Promoter_Associated	NA
cg00177431	16643397	16643397	16643397	TTTACCTAATTTTATTAATTACTTTAACCCTAAATTATCACTATCCTCCC	0.00371373	NA		II			ATTTGGACTCATAATTACACCTCTGGGCCATGTGGCAAACAACTCTGATTACCCTCTAGA[CG]GGAGGACAGTGACAATTTAGGGCCAAAGCAACTAATAAAATTAGGCAAAATAAGTGGCAC	37	20	56272862	CGGGAGGACAGTGACAATTTAGGGCCAAAGCAACTAATAAAATTAGGCAA	20	55706268	F			NA	NA	PMEPA1	NM_199171;NM_199170;NM_199169;NM_020182	5'UTR;5'UTR;Body;Body				CDMR	TRUE				NA
cg00177451	29695419	29695419	29695419	TTCCCAAAACAATTAAAACTAAAATTTTCRAAAAAAACAACCCCRAACCC	0.014029	NA		II			TACCTCGGACATTCCCAGGACAATTAGGGCTGAAGTTTTCGGGAGAAGCAGCCCCGAGCC[CG]TGGGATAAGGGGGCGGCCCGGCTCCGCCCAGGACCCCTCCCGGACCTCCCCCCCGGCTGC	37	16	51186266	CGGGCTCGGGGCTGCTTCTCCCGAAAACTTCAGCCCTAATTGTCCTGGGA	16	49743767	R			NA	NA	SALL1	NM_002968	TSS1500	chr16:51183699-51188763	Island		DMR	NA	16:49742877-49744648			TRUE
cg00177797	67759416	67759416	67759416	AAACACRCAAATACAACAAATAAAAAACAAAAATCTACATTAAACAATCC	0.0010893	NA		II			AGCCGGACACGGAGCACGCAGGTGCAGCAGGTGAGGGGCAAAGGTCTGCATTGAGCAGTC[CG]CAGTGTCCCGGGAAGTCGTAAAGTCGGGACTGAGAAGAAGCAGGACCTAACTCAAGTTTA	37	1	180203837	CGGACTGCTCAATGCAGACCTTTGCCCCTCACCTGCTGCACCTGCGTGCT	1	178470460	R			NA	NA	LHX4	NM_033343	Body	chr1:180198119-180204975	Island			NA	1:178470052-178471598			NA
cg00178119	10655374	10655374	10655374	TTTTCTTCAAATCATAACACAAAAACTCCTCAATTTTTACCAAATTCCAC	0.00204393	NA		II			GTTCACTTTTTATCATTTTTAACAAAGAGAGTAAAAGAGAAAGCTTTAATTGTAGGTTTT[CG]TGGAACTTGGTAAAAATTGAGGAGCCTTTGTGTCATGACTTGAAGAAAATTTCAATATTT	37	8	105235184	CGTGGAACTTGGTAAAAATTGAGGAGCCTTTGTGTCATGACTTGAAGAAA	8	105304360	F			NA	NA	RIMS2	NM_014677;NM_001100117	Body;Body	chr8:105235384-105235979	N_Shore			NA				NA
cg00178359	49660494	49660494	49660494	AAAACAACCTCRAAAAAACTAAAAAAAACRACCTAAACTTCRAAAACACC	0.000338136	NA		II			GAGGAGGGTGGAAGGCAACCTCGGGGAAACTGGGAAAGGCGGCCTGGACTTCGGGAACAC[CG]CGTACCTGCGGGGGCACAGCCCCACCCGAGCGAACGGGCTCCAAAGGGGAGGTCCCGCGG	37	16	56659460	AGGCAACCTCGGGGAAACTGGGAAAGGCGGCCTGGACTTCGGGAACACCG	16	55216961	R			NA	NA	MT1E	NM_175617	TSS200	chr16:56659107-56659660	Island			NA	16:55216623-55217161	16:56658962-56660177	Unclassified_Cell_type_specific	TRUE
cg00178648	15773342	15773342	15773342	AAAATAAATTTTAAACCCAAAAAATATATAATTCCAACTCTTAACAAATC	0.00202625	NA		II			TTGGTGATAGGTAGAAAGATTGGCTCCCAGATTGATAGCGTCTTGGGTGGATTAGTAAAT[CG]ATTTGTTAAGAGCTGGAATTATATACCTTTTGGGTCTAAAATTTACCTCACAACAGCTTA	37	3	62008370	CGATTTGTTAAGAGCTGGAATTATATACCTTTTGGGTCTAAAATTTACCT	3	61983410	F			NA	NA	PTPRG	NM_002841	Body					TRUE				NA
cg00178661	65612364	65612364	65612364	AAAATATAAAAACACTAATCCTATATCTCCTCACCAAAAAAACTTAAATC	0.00077343	NA		II			CCTAAAATCTCCCCTACCAGGCAGCTTCCTTTTCTTCAGGCTCTCCTTCTCCCAGAACTA[CG]ATCTAAGCTTCCTTGGTGAGGAGACACAGGACTAGTGCCCTCACATTTTTAGCCTTCAGA	37	1	117208338	AAATGTGAGGGCACTAGTCCTGTGTCTCCTCACCAAGGAAGCTTAGATCG	1	117009861	F			NA	NA	IGSF3	NM_001007237;NM_001542	Body;Body	chr1:117209824-117210621	N_Shore		RDMR	NA				NA
cg00178728	16704374	16704374	16704374	TTAAATTACATTTAAAACCATACTTTAAATATTTTCATAAATCATACTAC	0.00475743	NA		II			TCCTGCTGAATTTGGGTTACATTTAAAACCATACTTTAAGTGTTTTCATAGATCATGCTG[CG]GTCCTTGCATTCATGTTTGTATAGTGGCTGCCTTGATTCTTTTTTTAGGAAACCAACCAA	37	4	22516158	TGGGTTACATTTAAAACCATACTTTAAGTGTTTTCATAGATCATGCTGCG	4	22125256	R			NA	NA	GPR125	NM_145290	Body	chr4:22516856-22518048	N_Shore			NA				NA
cg00178850	17792370	17792370	17792370	ATATACTCTAAAAAATAAATCATTCATTCRTATATTCAAAAAACACCCAC	0.0111479	NA		II			CAGACCTCGCTTTCCTGGAGTTCTCTCTCTCCGCTGTCCTATAACCTAGACGGTGACATC[CG]TGGGTGTTTCTTGAACACACGAATGAATGATCTATCCCTCAGAGTACACTGGGGCTTTAC	37	1	236559675	TGTACTCTGAGGGATAGATCATTCATTCGTGTGTTCAAGAAACACCCACG	1	234626298	F			NA	NA	EDARADD	NM_080738;NM_145861	Body;Body	chr1:236558459-236559336	S_Shore			NA	1:234626233-234626299			NA
cg00178877	63636491	63636491	63636491	ACTAAACCTAAAAAATACCAATAAACTATACCCTTACAACTAAAAAAATC	0.000131774	NA		II			GGCTGCGGGCAGCTGAGCCTGGAGGGTACCAATAGGCTGTGCCCTTGCAGCTGGGGGAAT[CG]TAGTGGGGCTGGCCCAGCGGCAGGTCCCGGCAGCTCAGGTGGGCCTGGGCTGCAGCTGCG	37	1	27874258	CTGAGCCTGGAGGGTACCAATAGGCTGTGCCCTTGCAGCTGGGGGAATCG	1	27746845	R			NA	NA	AHDC1	NM_001029882	Body	chr1:27874417-27874638	N_Shore			NA	1:27746611-27751172			NA
cg00178984	63651312	71737494	63651312	CTTCCCATTTTTCTATCTCAAACTCACATACACATATACACCCACATACA	0.00288158	71737494	CTTCCCATTTTTCTATCTCAAACTCACATACACATATACACCCACGTACG	I	T	Red	GTCTGGGGATATGATTGATACTTAGAGGAGGATATGTAGTTGTGTGTATGCATGTGCACA[CG]CACGTGGGTGCACATGTGTATGTGAGTTTGAGATAGAAAAATGGGAAGAGTTGAAGGAAA	37	12	60091171	CGCACGTGGGTGCACATGTGTATGTGAGTTTGAGATAGAAAAATGGGAAG	12	58377438	F			NA	NA	SLC16A7	NM_004731	5'UTR					NA				NA
cg00179196	25766348	62728378	25766348	TATAATCCCCAACCAAAACAATCCTAAAAAAATCAAATTCCCCATACACA	0.00538829	62728378	TATAATCCCCGACCGAAACAATCCTAAAAAAATCAAATTCCCCGTACACG	I	C	Grn	CTGGCATGAGCGGATGCAAGCAGGAACAGTCAGGGGGTGAGAAGAGCCGAGAGCTGTGAG[CG]TGTACGGGGAACCTGACCTCCCCAGGACTGTTTCGGCCGGGGACCACAGCCGGCCCCAGG	37	16	117934	TGTGGTCCCCGGCCGAAACAGTCCTGGGGAGGTCAGGTTCCCCGTACACG	16	57934	F			NA	NA	RHBDF1	NM_022450	5'UTR					TRUE				TRUE
cg00179374	58793362	58793362	58793362	CACTATTACTAAAACTCATTATTTCTTTTACAAACCATATACTACTATAC	0.0041089	NA		II			TGGGAGGCACCCACTGTTGCTGGAGCTCATTATTTCTTTTGCAAACCATGTGCTGCTGTA[CG]CGTAGGTGGGATCTGCCTGTCCACGCCCTCAAGGGGCATGTGGGGAGAAATGTTCCATTT	37	7	132259150	ACTGTTGCTGGAGCTCATTATTTCTTTTGCAAACCATGTGCTGCTGTACG	7	131909690	R			NA	NA	PLXNA4	NM_020911;NM_181775;NM_001105543	5'UTR;5'UTR;5'UTR	chr7:132260474-132262527	N_Shore			NA				NA
cg00179576	67681471	67681471	67681471	TAACACAAAACTACAACTAAAAATAATAACCCRAAAAAAATCRCTTTCCC	9.17e-06	NA		II			GAAGGATGCACTAACACAGAACTGCAGCTGGGGGTGGTAGCCCGGGGAAGATCGCTTTCC[CG]GGGGTGATCCCAAGCCTATGGAGTGCATGGCTCCCCTGCCGGTGCTTCTTGCTAACGGGC	37	16	74483694	AACACAGAACTGCAGCTGGGGGTGGTAGCCCGGGGAAGATCGCTTTCCCG	16	73041195	R			NA	NA	GLG1	NR_027264;NM_001145666;NR_027265;NM_012201;NM_001145667	Body;3'UTR;Body;3'UTR;3'UTR					TRUE				TRUE
cg00179663	18601385	18601385	18601385	TCACTACACTACCTTCAAATTCAAAACATAACTAAAAAATTATATCACRC	0.00153187	NA		II			GGTCTCAGTTTTCACTGCACTACCTTCAAATTCAAAACATGGCTGAAGAATTATGTCACG[CG]CTTCCCAGTGAAGACACCACCAAACAGGCTTTGTGTGAGCAACAAGGCTGTTTATTTCAC	37	4	92189705	CGCGTGACATAATTCTTCAGCCATGTTTTGAATTTGAAGGTAGTGCAGTG	4	92408728	R			NA	NA	FAM190A	NM_001145065	Body					TRUE				NA
cg00179795	72689426	72689426	72689426	RTAAACAAACTTCTCTCTCRATTTAAACCTCTACTCAATATTTAATAATC	0.029768	NA		II			AGCTGGTGACACGCCCAGCCCGTAGCCACCTTTCGCCCTGCGTGAACTTGGCAGGGGAGT[CG]ACCATTAAATACTGAGCAGAGGCTCAAACCGAGAGAGAAGCCTGCCCACGCCGCCACCCC	37	10	131695114	CGACCATTAAATACTGAGCAGAGGCTCAAACCGAGAGAGAAGCCTGCCCA	10	131585104	F			NA	NA	EBF3	NM_001005463	Body	chr10:131697079-131697412	N_Shore			TRUE				NA
cg00179921	34802427	34802427	34802427	TCTTTTATACATTAAACTCTAAAAATTCAAACACAATAAAAACTTACCAC	1.97e-06	NA		II			ATACTTTAACATCTTTTATGCATTAGACTCTAGGGATTCAGACACAGTAAGAGCTTGCCA[CG]TCCTGACACATGTCAAAATATCACCATCTTGCCTACACCAGCCCCTCCGAAAGTCTTTAT	37	22	39927437	CGTGGCAAGCTCTTACTGTGTCTGAATCCCTAGAGTCTAATGCATAAAAG	22	38257383	R			NA	NA	RPS19BP1	NM_194326	Body	chr22:39928303-39929071	N_Shore			NA		22:39927309-39929400	Promoter_Associated	NA
cg00180097	56784326	56784326	56784326	AAAATAACRATTTAATAAATACTAAAACTAATACTCTATTTTCTCCAATC	0.00590343	NA		II			ACTTGTGGGAAAAAGTAACGATTTAGTGGATACTGGAGCTAATGCTCTGTTTTCTCCAGT[CG]TCCTCCAGAGGAGCGTCCCCCGGGGCTTCCCCTGCCTCCCCCACCTCCCAGCAGTTCTGC	37	6	31601157	AAGTAACGATTTAGTGGATACTGGAGCTAATGCTCTGTTTTCTCCAGTCG	6	31709136	R			NA	NA	BAT2	NM_080686	Body	chr6:31599519-31599761	S_Shore			TRUE				NA
cg00180559	60668373	60668373	60668373	CTATTCTAAATTACTCTACTAAAAAATCAAACACTCACATAAAAATCAAC	0.00216068	NA		II			GTATTAGGGTATTCTAAGATTAAGTTTATCTGGAACAGTGTAAATAAAAGCTTGCAGATG[CG]TTGATTTTTATGTGAGTGCTTGATTTCTTAGCAGAGTAATTTAGAATAGAAACTGGTTCA	37	1	233496768	TATTCTAAATTACTCTGCTAAGAAATCAAGCACTCACATAAAAATCAACG	1	231563391	F			NA	NA	KIAA1804	NM_032435	Body	chr1:233497707-233497917	N_Shore			NA				NA
cg00180930	55698499	55698499	55698499	CCCTACACRAAAACTAAACAAACTACAAACCAAACRAATTAAAACCCAAC	3.76e-08	NA		II			AGCGGCACCTTGACAGGATAGCCCGAGGCAGCACGGCGTTCCCGCAGACGCTGGGCCTGC[CG]CTGGGCCTCAACTCGCTTGGCTTGCAGCTTGCCCAGCTCCCGTGCAGGGTCCACCAGCCC	37	6	31746832	CCTGCACGGGAGCTGGGCAAGCTGCAAGCCAAGCGAGTTGAGGCCCAGCG	6	31854811	F			NA	NA	VARS	NM_006295	Body					NA	6:31854774-31855249			NA
cg00181432	51740472	51740472	51740472	AAAAATATACAAACTAATAACAAAACTTAAATTTATTCCTAACACTACAC	0.00494485	NA		II			CATCTCTTTGTTTTGATGCTTGGAGAGAGGAAGCAGCTTGAGCAAGTCGTAGATTGAGTG[CG]TGCAGTGTCAGGAATAAACCCAAGTCTTGTCACTAGCCTGTACACCCCTGGGGAGAGTGG	37	3	194393818	GGGGTGTACAGGCTAGTGACAAGACTTGGGTTTATTCCTGACACTGCACG	3	195875107	F			NA	NA	LSG1	NM_018385	TSS1500	chr3:194392808-194393378	S_Shore			NA				NA
cg00181439	62670454	62670454	62670454	CRTCRAACATCACTTATTACACTACCTCCATCCTACACCTCTATATCATC	0.0154254	NA		II			TGGGAGTCCTTTTAGCTGAGTACTCCACGGCGTCCGTGATGGCCCAGTAGCGGTCCAGGG[CG]ATGACACAGAGGTGCAGGATGGAGGCAGTGCAACAAGTGATGTCCGACGACAGCCAGAAG	37	6	78172691	GTCGGACATCACTTGTTGCACTGCCTCCATCCTGCACCTCTGTGTCATCG	6	78229410	F			NA	NA	HTR1B	NM_000863	1stExon	chr6:78172231-78174088	Island		RDMR	NA	6:78228951-78230811	6:78171812-78172761	Unclassified	NA
cg00182416	49621464	49621464	49621464	AAACTTAATCATAAAAACTCATCAAAATTTAAACCTAAATCACAAATACC	1.17e-05	NA		II			ATTCTCCTGTCTTGGCCTCCTAAAGTGCTGGGATTAGAGGTGTGAGCCACCATGCCCCAT[CG]GTACTTGTGATTTAGGTTCAAATTTTGATGAGTTTTTATGACCAAGCCTGTGGTCTATCC	37	19	54263917	CGGTACTTGTGATTTAGGTTCAAATTTTGATGAGTTTTTATGACCAAGCC	19	58955729	F			NA	NA	MIR516A2	NR_030221	TSS1500					NA				NA
cg00182639	46724359	17772509	46724359	AAAACCCTAAACACACCATAACCAACACAAACAAAAACTTTAACCTAACA	4.59e-06	17772509	AAAACCCTAAACGCACCATAACCGACGCAAACGAAAACTTTAACCTAACG	I	C	Grn	CGCGCTCTCGGGTTTCGAATCGCAGGGCAGGTCTTTTGCGTCAGGCTCCAGAGGCGTGTG[CG]CCAGGCCAAAGCCCTCGTCTGCGTCGGCCATGGTGCGCCCAGGGCCCTGTGCCCGCGCAA	37	12	114841671	CGCCAGGCCAAAGCCCTCGTCTGCGTCGGCCATGGTGCGCCCAGGGCCCT	12	113326054	F			NA	NA	TBX5	NM_000192;NM_181486;NM_080717;NM_080718	Body;Body;5'UTR;1stExon	chr12:114843022-114843610	N_Shore			NA	12:113325874-113326264	12:114840555-114842091	Unclassified_Cell_type_specific	NA
cg00183107	52770453	52770453	52770453	AAAAATAAAATAAACTATCTCTCCTCRACTACTAAAATACCCCTATCACC	2.33e-07	NA		II			AGTGAGAATGCGAAAACGCGCGCGCGCCGGGCAGAGGGGCGCTCGGCGAGAGGGTAGGCG[CG]GTGACAGGGGTACCCCAGCAGCCGAGGAGAGACAGCCCACCCCACCCTTTAAGCTAAAGA	37	4	143767118	AGGGTGGGGTGGGCTGTCTCTCCTCGGCTGCTGGGGTACCCCTGTCACCG	4	143986568	F			NA	NA	INPP4B	NM_001101669;NM_003866	5'UTR;5'UTR	chr4:143766940-143768413	Island			NA	4:143986335-143987893	4:143766907-143768900	Unclassified_Cell_type_specific	NA
cg00183186	55649305	55649305	55649305	TAAACTCTTTATATAAAATCCAAATCCRATCCRCCAAAACAATACAACTC	2.17e-05	NA		II			TACGGAGCAGATGGGCTCTTTATATAGAGTCCAGGTCCGGTCCGCCAGAGCAGTGCAACT[CG]TGCGGCGCGGCGGGTGCGGACGCCCGCTCCCCATCACCTTCCCTTTTTCTCTCTCCCTCC	37	6	78174065	GGGCTCTTTATATAGAGTCCAGGTCCGGTCCGCCAGAGCAGTGCAACTCG	6	78230784	R			NA	NA	HTR1B	NM_000863	TSS1500	chr6:78172231-78174088	Island			NA	6:78228951-78230811			NA
cg00183804	62602423	62602423	62602423	AAAAATTTCTAAAAAATCTAAACAAAATTCTTATCATACCAACCAAACAC	0.0067848	NA		II			GAGGGACGAGCGCAGAGTCAGGGGTGTGTCTTTCTGCGCCGCGCGGTGCGAGGAAAGAAG[CG]TGCCTGGTTGGCATGATAAGAATTTTGTTTAGACTTTTTAGAAATTTTCCAGAGACTCAG	37	19	34746203	AAAATTTCTAAAAAGTCTAAACAAAATTCTTATCATGCCAACCAGGCACG	19	39438043	F			NA	NA	KIAA0355	NM_014686	5'UTR	chr19:34745218-34746204	Island			NA		19:34744883-34746758	Promoter_Associated	NA
cg00184203	10778484	10778484	10778484	AACRATAATACAACAAAACCTATTTATTTAAAATCCTAACTTTTTAATCC	3.35e-05	NA		II			TAAGCAATGATGGCGGTGATGCAGCAAAGCCTATTTGTTTGAGATCCTGGCTTTTTGATC[CG]TTGGTGCCACCCACGCTATGTGCTGGATGGGGGTAATCAATATACCACCTTCTCTGCTAC	37	2	187558402	CGGATCAAAAAGCCAGGATCTCAAACAAATAGGCTTTGCTGCATCACCGC	2	187266647	R			NA	NA	FAM171B	NM_177454	TSS1500	chr2:187558794-187559012	N_Shore			NA				NA
cg00185066	58669446	58669446	58669446	TCTAACAAACATATCAATTAAAACRACACATAAACAAAAAACATTTCACC	1.01e-06	NA		II			ATTAGCTGAGTTCTAACAAGCATATCAGTTAAAACGGCACATGGACAAAAAGCATTTCAC[CG]CAAACAGCAAAGACTATCCCACCTTTCTATTAACAGTGCCAAGATTATAACTGTTTAGTT	37	13	80910763	CGGTGAAATGCTTTTTGTCCATGTGCCGTTTTAACTGATATGCTTGTTAG	13	79808764	R			NA	NA	SPRY2	NM_005842	3'UTR	chr13:80913157-80913461	N_Shelf			NA				NA
cg00186141	42663366	42663366	42663366	RAAAAACCRTAAATAATTATCAATTACCACRCAAAACTAAAAATCCRCCC	0.0145498	NA		II			GGGCCCGGCGGGATCCCCCAGCACACCGCCGGGGCCCTCGCACTACGAGCAAATCCGGAG[CG]GGCGGACCCCCAGCCTTGCGTGGTAACTGATAACCATTCACGGCCTCCCGGGCTGCTGCG	37	7	131241768	CGGGCGGACCCCCAGCCTTGCGTGGTAACTGATAACCATTCACGGCCTCC	7	130892308	F			NA	TRUE	PODXL	NM_001018111;NM_005397	TSS1500;TSS1500	chr7:131240513-131241847	Island			NA	7:130890887-130892381	7:131240294-131242057	Unclassified	NA
cg00186143	37795447	37795447	37795447	ATTAACAATTTCTTCTCATCTAACTATAATAACATCTAAATAATTCAAAC	9.09e-05	NA		II			CAACATGAAGTGTTGACAATTTCTTCTCATCTGACTATAGTGGCATCTGAGTGGTTCAGA[CG]ATGATATTAGTGAAATTCTGTGTAGAATCATCCTTTCCATGGAAACCCTTTAGATCTGGG	37	2	7029602	CGTCTGAACCACTCAGATGCCACTATAGTCAGATGAGAAGAAATTGTCAA	2	6947053	R			NA	NA	RSAD2	NM_080657	Body					NA		2:7029557-7029774	Unclassified_Cell_type_specific	NA
cg00186701	10607449	10607449	10607449	ACTCCTCCAATTATCTCTTATAACATCTATCATAAAAAAAATACTCRAAC	0.00106756	NA		II			AAACATCTTCAGCTCCTCCAGTTATCTCTTGTGGCATCTGTCATGAAGAAAGTGCTCGGG[CG]TGTGTGTCTCTCTTTGAACACCTTTGCTGAGGGATTTGCTCTGGTACCTTAACTCCAGAG	37	8	98290510	CGCCCGAGCACTTTCTTCATGACAGATGCCACAAGAGATAACTGGAGGAG	8	98359686	R			NA	TRUE	TSPYL5	NM_033512	TSS1500	chr8:98289604-98290404	S_Shore			NA	8:98358575-98359687	8:98289986-98290577	Promoter_Associated	TRUE
cg00187059	56663440	56663440	56663440	ACAACTACTTCATCTTCRTCATCATCATCCAACACRATAATACTATTAAC	7.54e-06	NA		II			GCCCTGGCTGAGCAGCTGCTTCATCTTCGTCATCATCATCCAGCACGATGATGCTGTTAG[CG]GTGGCCATAGGGGATCAAATCCCCCGGAGGGAGGAAGTGGTGGGGATTTCAGAATTCCTG	37	6	33289693	CAGCTGCTTCATCTTCGTCATCATCATCCAGCACGATGATGCTGTTAGCG	6	33397671	R			NA	NA	DAXX	NM_001141969;NR_024517;NM_001350;NM_001141970	Body;Body;Body;Body	chr6:33290370-33291087	N_Shore			NA				NA
cg00187129	61682505	61682505	61682505	CATACTCCTTATTAACCCCACATCTATCTCTTAACTAAACTAAAAATTTC	0.000420448	NA		II			ACTCTCTCTTACATGCTCCTTGTTAACCCCACATCTATCTCTTAACTAGACTGAGAATTT[CG]GCATTAATGTTTATAATATTTCTTTCCTGTTTGTTTCCTAAGGACAGTTTTTTTTTTCAT	37	16	66580422	ATGCTCCTTGTTAACCCCACATCTATCTCTTAACTAGACTGAGAATTTCG	16	65137923	R			NA	NA	TK2	NM_004614	Body	chr16:66583236-66584135	N_Shelf			NA				NA
cg00187244	54743510	54743510	54743510	CATAAAAATATAAAAACTACAAATAAATCTTCTCTTCCCCATCCCAACAC	0.00061395	NA		II			GATATTCTCCTAAAAAATTTCCAGGTTGATTCAAATAACTTAGGTTAAACTCAACTTTTA[CG]TGTTGGGATGGGGAAGAGAAGACTTATTTGTAGCCTTCACACCTTTATGTTCCTGTTTCA	37	22	41492007	CGTGTTGGGATGGGGAAGAGAAGACTTATTTGTAGCCTTCACACCTTTAT	22	39821953	F			NA	NA	EP300	NM_001429	Body	chr22:41487261-41489159	S_Shelf			NA				NA
cg00187299	70638389	70638389	70638389	AAACCCACCTCCCTAAAAATAAATCCCCAAAACCAAAATACATAAAAACC	0.0050184	NA		II			TTGGTGGGCTGCGTCCCAGCTTCGTCAGCCCCACCTGGCCTGACCCCACCACACAGGGGT[CG]GCTTCCATGCATCTTGGTTCTGGGGACCCATTCTCAGGGAGGTGGGTCTTGGAAGGAGAG	37	10	72545473	CGGCTTCCATGCATCTTGGTTCTGGGGACCCATTCTCAGGGAGGTGGGTC	10	72215479	F			NA	NA	C10orf27	NM_152710	TSS1500					NA				NA
cg00187414	28767443	28767443	28767443	AATCRCACACCCTATCCTTAACRACCTATTTATAACAAATAACACTACCC	0.0184634	NA		II			GAGCGCGGAGAGCGGGCAGGCAGTGCCACCTGCTGAGAGCCACTCAGGCCGAGCAAGCGG[CG]GGCAGTGCCACCTGCTATAAATAGGCCGCCAAGGACAGGGTGTGCGACTGTACATCCCGC	37	4	37892193	GTCGCACACCCTGTCCTTGGCGGCCTATTTATAGCAGGTGGCACTGCCCG	4	37568588	F			NA	NA	TBC1D1	NM_015173	TSS1500	chr4:37891656-37893314	Island			TRUE	4:37568052-37569696	4:37891938-37893651	Promoter_Associated	TRUE
cg00187535	39775417	39775417	39775417	TCTTTACAAATAAAAAATCRACACTAAAACACACAACAATAACATAAATC	4.03e-06	NA		II			TTACGCGCATCTCTTTGCAAGTGGGAAGTCGGCACTGGAGCACACAACAGTGGCATGGGT[CG]AGGGTGTCCCAGGGCCCCTCGCGGTTCTCCCTCCTTTCCTCCCGGCCTGCTCCCCTTCCC	37	19	7747028	CTTTGCAAGTGGGAAGTCGGCACTGGAGCACACAACAGTGGCATGGGTCG	19	7653028	R			NA	NA	TRAPPC5	NM_174894;NM_001042462;NM_001042461	5'UTR;5'UTR;5'UTR	chr19:7745490-7747714	Island			NA	19:7651556-7653687	19:7745376-7747306	Promoter_Associated	NA
cg00187686	11626503	11626503	11626503	TTTATCTCCTATCCTAAACCTTCRAATTTCATATCTATTATTTACCTTCC	9.51e-09	NA		II			AATAACTTTCCTTTGTCTCCTGTCCTAAACCTTCGGGTTTCATATCTATTATTTGCCTTC[CG]TGCAGTGAAGATATATTAGGCAAATGACTGTTTCCTATAATCTTTCCTTTTTTTTCCGTT	37	11	59634218	CGGAAGGCAAATAATAGATATGAAACCCGAAGGTTTAGGACAGGAGACAA	11	59390794	R			NA	TRUE	TCN1	NM_001062	TSS200					NA				NA
cg00187692	45777456	45777456	45777456	AATACTACATCAAATAAAAAATTCCCTCCATTAATATCAACTTCCTTTTC	1.69e-09	NA		II			TGCCAACACTGGCTGAGGGCGGAATGCTGACGGGGCAAGGATGAGGCGCAGCCAGGACTT[CG]AAAAGGAAGCTGATATCAATGGAGGGAATTTTTCATCTGATGCAGCATTTCATATACTTA	37	13	52199954	ATGCTGCATCAGATGAAAAATTCCCTCCATTGATATCAGCTTCCTTTTCG	13	51097955	F			NA	NA	WDFY2	NM_052950	Body					TRUE				NA
cg00188032	11768493	11768493	11768493	TATTCACTACATAAAATTTTTACCAAACCCCACTCATACACTACATCCTC	1.03e-09	NA		II			ATCAGAGGCTTTGCAGGGTTGGGTCCATGAGGGGTCCAAAGAGAAACAGTTATGTCTCAA[CG]AGGATGCAGTGCATGAGTGGGGCTTGGTAAAAACTCCATGTAGTGAATAAAGGGCTTCAC	37	5	96141721	CGAGGATGCAGTGCATGAGTGGGGCTTGGTAAAAACTCCATGTAGTGAAT	5	96167477	F			NA	NA	ERAP1	NM_001040458;NM_016442	5'UTR;5'UTR	chr5:96143102-96143885	N_Shore			NA				NA
cg00188055	59610328	59610328	59610328	CTCTCAATTCCACTTCCAATTATTTCTATACCATTAAATTCTTTCCAAAC	0.00492808	NA		II			CCCAGTAGTTCCTCTCAGTTCCACTTCCAGTTGTTTCTATGCCATTAAATTCTTTCCAGG[CG]AGATAAGGGGCCCGCCCTTCCCACCCGGGGCGTGTCACGTGTACTGGTGGTGGGGGGCGG	37	6	32076079	CGCCTGGAAAGAATTTAATGGCATAGAAACAACTGGAAGTGGAACTGAGA	6	32184057	R			NA	NA	TNXB	NM_019105	5'UTR					TRUE				TRUE
cg00188748	63631475	63631475	63631475	AAAAATCAATCTAATAAAAAACAACCCTTCAAATAATTAATAAAATTTCC	4.42e-05	NA		II			AAACAATTTCTCATAAATATTTTCTCCCAATGCTGGGAAGAGGGAGAGGGGAAGGAGGTA[CG]GAAACTCCATCAATCATTTGAAGGGCTGCCTTTTATCAGACTGATTTTCCGTAGTGGGTT	37	9	130564509	CGGAAACTCCATCAATCATTTGAAGGGCTGCCTTTTATCAGACTGATTTT	9	129604330	F			NA	NA	FPGS	NM_001018078;NM_004957	TSS1500;TSS1500	chr9:130564863-130565566	N_Shore			NA				NA
cg00189101	23637490	23637490	23637490	ACCTAAACTTAAACCTTAATTTTTTCACTAATTTTTCTTTCCCAAAATAC	0.00288284	NA		II			GTACTGAGATGCGGAAGGTAAGGACGAGAAAGGCCTCAAGACGGCAGCGCAGGCCCCTGC[CG]TACTCTGGGAAAGAAAAATTAGTGAAAAAATTAAGGCTCAAGTCCAGGTCTTTGCTGTAA	37	2	242088304	CCTGGACTTGAGCCTTAATTTTTTCACTAATTTTTCTTTCCCAGAGTACG	2	241736977	F			NA	NA	PASK	NM_015148	5'UTR	chr2:242088415-242090330	N_Shore			NA	2:241736977-241739003			NA
cg00190034	66685423	66685423	66685423	CACCTCCACAAATCACAACCAAAAATCTTTCAAACCTATCCCTAAAATAC	0.00255584	NA		II			TTCCACCCAATCACCTCCACAAATCACAACCAGGGGTCTTTCAGGCCTATCCCTGGGGTG[CG]GGGTGGGGGCAGGGAGCAGAGGAGATGGAGTTTGTAATTTGAAATGGGACCCCATTTGAA	37	8	38584636	ACCTCCACAAATCACAACCAGGGGTCTTTCAGGCCTATCCCTGGGGTGCG	8	38703793	R			NA	NA	TACC1	NM_001146216	TSS1500					NA				NA
cg00190162	63662507	63662507	63662507	ATCAAAAACRACCAAACCRAAACACACACTCACTTATACTAAAACTAATC	0.000868955	NA		II			ACGGCATCCCCATCAGGGACGGCCAGGCCGGGACACACACTCACTTGTACTGAGACTGGT[CG]TTGCCGCCGACATCTGGGGATGTTAACTTCTGCAGCAAAATTCGTATAATACTAATGAAA	37	7	158826920	CGACCAGTCTCAGTACAAGTGAGTGTGTGTCCCGGCCTGGCCGTCCCTGA	7	158519681	R			NA	NA	VIPR2	NM_003382	Body	chr7:158823178-158824316	S_Shelf			NA	7:158519622-158519682			NA
cg00190355	19758507	19758507	19758507	TTATTTCCTAATTAAAAACAATTTATTCTAACAACCAAACAAAAATAAAC	0.0223887	NA		II			GCTGTGAAGGACACAGTCAGCCGGACTTTGCTTAGTTCACCTGTCGGAGCCACTCGTTCA[CG]TTTATCTCTGTCTGGTTGTCAGAATAAATTGTTTCCAACCAGGAAACAAGGATATCTCTT	37	5	497639	TGTTTCCTGGTTGGAAACAATTTATTCTGACAACCAGACAGAGATAAACG	5	550639	F			NA	NA	SLC9A3	NM_004174	Body	chr5:498111-498430	N_Shore			NA				NA
cg00190795	53688322	53688322	53688322	CTAAACTAAAAACCAAACCTCCAACTACAACCTACCTCCCRAATACAAAC	0.000281045	NA		II			AGGGCCTTGCACTAGGCTGGGGGCCAGGCCTCCAGCTACAACCTGCCTCCCGAATGCAGA[CG]CGGGAGAGTCTAGGAGCACTCGGGCAACTCAGTCCCTCCCTCCACCGCTTCACCTGCTTC	37	3	195599898	TAGGCTGGGGGCCAGGCCTCCAGCTACAACCTGCCTCCCGAATGCAGACG	3	197084295	R			NA	NA	TNK2	NM_001010938;NM_005781	Body;Body	chr3:195600845-195602361	N_Shore			NA	3:197084285-197084358	3:195599892-195600079	Unclassified_Cell_type_specific	TRUE
cg00191458	58777424	58777424	58777424	TTTTAAAAAAAACCCAATATACCTTCTACAAAACCTATACCACTTACTTC	0.00288128	NA		II			TTCTGTGCCCTCAGGATCCAGCGTGGGACTCGTGAGAACCCTCCAGAGACAGCCACATTT[CG]AAGCAAGTGGCACAGGCTTTGCAGAAGGCACACTGGGCCCCTCTCAAAACTCAAGCAGCA	37	5	169757859	CGAAGCAAGTGGCACAGGCTTTGCAGAAGGCACACTGGGCCCCTCTCAAA	5	169690437	F			NA	NA	LOC257358	NR_026945	TSS1500					NA				NA
cg00192882	58670408	58670408	58670408	TTCTTAACAAACCTAAAACATTTCTAAACCATAAACACAAAACTACTAAC	0.000110941	NA		II			GAGGCAGCAGTTTCTTGGCAGGCCTGGGACATTTCTGAGCCATGAGCACAAGGCTGCTGG[CG]TCCAACTGCTCTGTCTGCCCCAGCTCAGGCCAGGGCCCCTCTCCAGTCCCCCTCCCCAGC	37	17	19291120	CGCCAGCAGCCTTGTGCTCATGGCTCAGAAATGTCCCAGGCCTGCCAAGA	17	19231713	R			NA	NA	MFAP4	NM_002404	TSS1500					TRUE				TRUE
cg00193490	70810462	70810462	70810462	CRAAATCAACATTCAAATATATCTACCTCTAAACCTCCTAAACACCRACC	0.00463654	NA		II			CCAGAGAGCTCCGAACCTTCTGTGAGTGGGTGTGGGGAGGAGATGGGGACCCAGTGGGGT[CG]GTCGGTGTTTAGGAGGTTTAGAGGTAGATACATCTGAATGCTGACCCCGACTTCAACCCT	37	19	10402525	CGGTCGGTGTTTAGGAGGTTTAGAGGTAGATACATCTGAATGCTGACCCC	19	10263525	F			NA	NA	ICAM5	NM_003259	Body	chr19:10399844-10405375	Island			NA	19:10260419-10264937			NA
cg00193668	13608358	13608358	13608358	AAAATCACATATAACACCCAAATAAAAAATCAACTAATATCAAACAAAAC	0.00469149	NA		II			CGTTACTTGTTTTCTGATCTTTAAGCCTTGTCGCCTGTTTTATTTAAGTTTTAATGCAAT[CG]CCCTGTTTGACACTAGTTGACCCCTCATCTGGGTGTCACATGTGACTCTGTGAATTTTAA	37	9	35814283	CGCCCTGTTTGACACTAGTTGACCCCTCATCTGGGTGTCACATGTGACTC	9	35804283	F			NA	NA	HINT2	NM_032593	Body	chr9:35814649-35815119	N_Shore			NA		9:35813009-35815894	Promoter_Associated	NA
cg00194277	41781378	41781378	41781378	CTATCTTAAATACRATCTAACTCCTATATAACTATAAAACACCCAAAAAC	0.00400227	NA		II			AAGCCTTACAGCTATCTTAGATGCGATCTGACTCCTGTGTGACTGTGGAGCACCCAGGGA[CG]TGGTTTTAGAGTCTACCTAATATGTTAAGGACAAGGAAACCTCTGAGTCTACCTAATATG	37	7	30795751	CGTCCCTGGGTGCTCCACAGTCACACAGGAGTCAGATCGCATCTAAGATA	7	30762276	R			NA	NA	INMT	NM_006774	3'UTR					NA				NA
cg00195828	74747484	62686380	74747484	ATATTTCAAAAACTTACAAAAAATTAACACAACACCAAAATCAAAACACA	0.0157586	62686380	ATATTTCGAAAACTTACAAAAAATTAACGCAACACCAAAATCGAAACGCG	I	A	Red	TGAAGGCCCGGTGGGCATCGCTGCCAGAACAAAAAGAGTAAGGAGCTGGACACGGGGCCC[CG]CGCTCCGATCCTGGTGCTGCGCTAACTCCCTGCAAGTTCCCGAAACACCGTGAGTCCTCT	37	8	8680903	GTGTTTCGGGAACTTGCAGGGAGTTAGCGCAGCACCAGGATCGGAGCGCG	8	8718313	F			NA	NA	MFHAS1	NM_004225	Body					NA	8:8718305-8718382			NA
cg00196414	30767479	30767479	30767479	ACAAAAAAATTCAAAATAATTACCCAAAATACCTTTCCCAAAAACAACTC	0.000261782	NA		II			AGGGCACAGGGGCAGGGGAGTTCAGAGTAGTTGCCCAGGGTACCTTTCCCAAAAGCAACT[CG]GCTGCTGACTAGGGGTCTACCGGCTCGCTCGGGCTCTTAGACACGAGCGCAGAAACATTT	37	2	176947764	CAGGGGAGTTCAGAGTAGTTGCCCAGGGTACCTTTCCCAAAAGCAACTCG	2	176656010	R			NA	NA	EVX2	NM_001080458	Body	chr2:176944087-176948446	Island		RDMR	NA	2:176655880-176656692	2:176947753-176948760	Unclassified_Cell_type_specific	NA
cg00196660	65620489	65620489	65620489	ATAAAAACTAAAACTCTAAACACCAACAATATAACCAAAAACRCCCAACC	1.67e-06	NA		II			ATGGCACGGAACAGGGCAGCGGAAAAGGCAGGAGTCCGAGGCCCAGGGCCCTGCCTCTGG[CG]GCTGGGCGCCCTTGGTCACATTGTTGGTGCTCAGAGCCTCAGTTCCCACAGCTGTGCAGC	37	17	73720645	CGGCTGGGCGCCCTTGGTCACATTGTTGGTGCTCAGAGCCTCAGTTCCCA	17	71232240	F			NA	NA	ITGB4	NM_000213;NM_001005731;NM_001005619	5'UTR;5'UTR;TSS200	chr17:73717023-73717847	S_Shelf			NA				NA
cg00196810	58648445	58648445	58648445	ATAACTTAATAACTAAATCRAAATTCRATCACAAATAAACTAACRTCAAC	0.0157086	NA		II			CTAGGTCGGCTCGGTCTTTTTACACGTTGTAGACAGAGGCAGCATAACAGATAACAAGGA[CG]CTGACGTCAGCCTACCTGTGATCGAATCCCGACTCAGCCATTAAGTTACCTCTGTGACTT	37	3	53925267	CGCTGACGTCAGCCTACCTGTGATCGAATCCCGACTCAGCCATTAAGTTA	3	53900307	F			NA	NA	SELK	NM_021237	Body	chr3:53925438-53926174	N_Shore			NA	3:53900271-53900339	3:53924859-53926659	Promoter_Associated	NA
cg00197322	35610340	35610340	35610340	RTACCCAAAATAAATAACCAATAAATACCCTATACACTAACCACACTACC	0.0194134	NA		II			CAGCTCACAGCACATCGCCTGCCCCATCTGCAGACGAGGCATCTACCTGAGCTCCCACCA[CG]GCAGTGTGGTCAGTGCACAGGGCACCCACTGGCCACCCACCCTGGGCACGAAGCCCATGC	37	7	1990554	CGGCAGTGTGGTCAGTGCACAGGGCACCCACTGGCCACCCACCCTGGGCA	7	1957080	F			NA	NA	MAD1L1	NM_003550;NM_001013837;NM_001013836	Body;Body;Body	chr7:1991914-1992122	N_Shore			NA				NA
cg00197373	71777375	71777375	71777375	TCAATATAACACATCTTATCCATATTCTCAAATAACCAAAAACAACAACC	0.0250537	NA		II			AGAGATGTCAGTCAATGTAACACATCTTGTCCATATTCTCAGGTGACCAGGAGCAACAAC[CG]AGCCATGGAGACGTGGGTGAACCAGTCCTACACAGATGGCTTCTTCCTCTTAGGCATCTT	37	5	180581937	CGGTTGTTGCTCCTGGTCACCTGAGAATATGGACAAGATGTGTTACATTG	5	180514543	R			NA	NA	OR2V2	NM_206880	TSS200					NA				NA
cg00198586	39678423	39678423	39678423	AAAAAAACCCATATATTAACTAAATACAAAAACAAACACCTACCTAAAAC	4.42e-05	NA		II			ACTTGCCACAGGCTTCCCCAAGCAGGTAAGTGGCTGAGCCAGGTCCAGCACTCAGTCCTG[CG]TTTCAGGCAGGTGTCTGTCTCTGTACCCAGCCAACACATGGGCTCCTTCAGCTTGAGGGC	37	3	123861151	AAGGAGCCCATGTGTTGGCTGGGTACAGAGACAGACACCTGCCTGAAACG	3	125343841	F			NA	NA	KALRN	NR_028136;NM_001024660;NM_003947	Body;Body;Body					TRUE				NA
cg00199000	72790309	72790309	72790309	AACTACAAAAACATAAAAAACRACTCTATAACCAAACTCATCTTAAAAAC	0.03085	NA		II			GTAGTCTCGCTTCTCCCGGGCCCGGCTGTCCCGCCTCCTCTCCTTGCTGTCCTCCTTCAC[CG]TCTCCAAGATGAGCTTGGCCACAGAGTCGCTCTTCATGTCCCTGTAGTCTGTCACTGGCG	37	16	89350310	ACTACAGGGACATGAAGAGCGACTCTGTGGCCAAGCTCATCTTGGAGACG	16	87877811	F			NA	NA	ANKRD11	NM_013275	Body	chr16:89345463-89348521	S_Shore	low-CpG:87876872-87877936		NA	16:87877431-87877872			NA
cg00200653	11669337	40731367	11669337	AATCTAAAATAAAAAACACCAATTCAATATCTACACTAAATTTACTTTCA	0.0191804	40731367	AATCTAAAATAAAAAACACCAATTCGATATCTACGCTAAATTTACTTTCG	I	A	Red	AATAATTAATAAAAGAGATGCCACCCAATCTCTAGTGAAGAAAGGCAAAGCTCGGTGATC[CG]AAAGTAAACCCAGCGCAGATACCGAACTGGTGTCCTTCATTCCAGATTGCAACACAACCC	37	15	60883225	AATCTGGAATGAAGGACACCAGTTCGGTATCTGCGCTGGGTTTACTTTCG	15	58670517	F			NA	NA	RORA	NM_002943;NM_134261;NM_134262;NM_134260	Body;Body;Body;Body	chr15:60883298-60885350	N_Shore			NA		15:60883001-60883772	Promoter_Associated	TRUE
cg00201457	39658322	39658322	39658322	TAACAAAACACTAAAATTTCCCATATTCAAATACACACCCTTATTACAAC	1.77e-06	NA		II			TTCTCATGATCTGACAGAACACTAGGGTTTCCCATATTCAAGTGCACACCCTTGTTACAA[CG]ACCACCACTCACAGAAGTCCAGCTTCCTATGAACCCAGGATAATGTTATGAACCAAGTGC	37	3	140405436	GACAGAACACTAGGGTTTCCCATATTCAAGTGCACACCCTTGTTACAACG	3	141888126	R			NA	NA	TRIM42	NM_152616	Body	chr3:140401459-140401986	S_Shelf			NA				NA
cg00201760	19699378	19699378	19699378	TAAAACTAAATAACTCACCCAAACATAAAACATTAAAAACAAAACTAAAC	0.00116827	NA		II			GGGTGACGGGAAGCTGGGGTTTCGGGACATCCAAGCTCCAGACTCACTGCTAAGCTCCCA[CG]TCCAGCCCTGTCCTCAATGTCCCATGCTTGGGTGAGCCATCCAGCCCTATTCACTGGTTG	37	16	28518385	AGGGCTGGATGGCTCACCCAAGCATGGGACATTGAGGACAGGGCTGGACG	16	28425886	F			NA	NA	IL27	NM_145659	TSS1500					NA				NA
cg00201779	39791321	39791321	39791321	TAAAAACCTTTCCTTTTAAAACACTACTTTACAATACCTAATCAACCRAC	0.0129547	NA		II			CACTGTTTAAGTGAAGGCCTTTCCTTTTAGAACACTGCTTTACAATGCCTAATCAGCCGG[CG]CTCAGGTTGGTGCATTCAGAGACCCGAGCGTTTGTGTTCCTAATAAGTTTGCTAGAATGT	37	6	72131020	CGCCGGCTGATTAGGCATTGTAAAGCAGTGTTCTAAAAGGAAAGGCCTTC	6	72187741	R			NA	NA	C6orf155	NR_026807	TSS1500	chr6:72129508-72130756	S_Shore		CDMR	NA				NA
cg00202246	66632459	66632459	66632459	TTCTCTAAATATATAATACAAATATTTATTTCTTTTACCATAAAAACCAC	2.1e-05	NA		II			AAAAGGTTTCCTTCTCTGGGTGTATGGTGCAAATGTTTATTTCTTTTGCCATGGGGGCCA[CG]GAGTGCATGATCTTAGGCACGATGGCACTGGACCGCTATGTGGCCATCTGCTACCCACTG	37	9	107331777	TCTCTGGGTGTATGGTGCAAATGTTTATTTCTTTTGCCATGGGGGCCACG	9	106371598	R			NA	NA	OR13C8	NM_001004483	1stExon					NA				NA
cg00202568	25615340	25615340	25615340	ACATAAAATCATAACATTTCATCRTATACTACTTCTACTATTTATCCTAC	1.79e-06	NA		II			GGTATGCAGAAGCATAAAATCATAGCATTTCATCGTGTGCTGCTTCTGCTGTTTGTCCTG[CG]TTATGCTGAGTCACCAAATTGTGTACGTTCACAGTCATTTCAGAATTACATCAATGAGGT	37	8	55528166	CGCAGGACAAACAGCAGAAGCAGCACACGATGAAATGCTATGATTTTATG	8	55690719	R			NA	NA	RP1	NM_006269	TSS1500					NA				NA
cg00202760	64600449	64600449	64600449	TCCATACTACRAAACATCTCCRCCAACACCTAATACTTATAAAACAACAC	8.57e-05	NA		II			CGAGAAGGCGCCCGCCTACCAGCGCTTCCATGCCCTGGCCCAGCCCGGCCTGCCGGGACT[CG]TGCTGCCCTACAAGTACCAGGTGCTGGCGGAGATGTTCCGCAGCATGGACACCATCGTGG	37	16	88871911	CGTGCTGCCCTACAAGTACCAGGTGCTGGCGGAGATGTTCCGCAGCATGG	16	87399412	F			NA	NA	CDT1	NM_030928	Body	chr16:88871850-88872056	Island			NA	16:87397282-87400050			NA
cg00203347	36679464	32777433	36679464	CAAAAATTACCTATATAACAAACTAAAATTCAACACCAAATACTACTACA	7.43e-05	32777433	CAAAAATTACCTATATAACGAACTAAAATTCGACGCCGAATACTACTACG	I	A	Red	AGCAGCCTCCCCCAGGGGTTACCTGTATGGCGGGCTGGAGTTCGGCGCCGAGTGCTACTG[CG]GCCACAAGATCCAGGCGACGAACGTGAGCGAGGCAGAGTGCGACATGGAGTGCAAGGGCG	37	12	108603943	CAGGGGTTACCTGTATGGCGGGCTGGAGTTCGGCGCCGAGTGCTACTGCG	12	107128073	R			NA	NA	WSCD2	NM_014653	Body					NA	12:107128073-107128158			NA
cg00203456	50641309	50641309	50641309	RTCCTTTAAACAACCCCRAACAAAAACTAAACTCAAAAACACCAATCRAC	0.0143149	NA		II			GCTGCCACAGAGGCGAAGCTTCCTAGAGCGGCCCGGAAGTGCCCGGCTGAAGCGGCCGGG[CG]CCGATTGGTGTCTTTGAGTCTAGTCTTTGTTCGGGGCTGTCCAAAGGACGCTAGCTGTTG	37	6	28092370	TCCTTTGGACAGCCCCGAACAAAGACTAGACTCAAAGACACCAATCGGCG	6	28200349	F			NA	NA	ZSCAN16	NM_025231	TSS200					NA	6:28200234-28200448	6:28091996-28092633	Promoter_Associated	TRUE
cg00204262	35650481	35650481	35650481	AAATTACCTAACACCAAAATTCATATTCTTAACCTAACRCAATAACTCAC	1.49e-05	NA		II			GGGCTAAAGCAGGATTACCTGGCACCAGAGTTCATGTTCTTAGCCTGGCGCAGTGGCTCA[CG]CCTGTAATACAAGCACTTTGGGAGGCCGAGGCAGGCGGATCACCTGAGGTCAGGAGTTCA	37	19	39323158	GATTACCTGGCACCAGAGTTCATGTTCTTAGCCTGGCGCAGTGGCTCACG	19	44014998	R			NA	TRUE	ECH1	NM_001398	TSS1500	chr19:39322264-39322574	S_Shore			NA				NA
cg00204465	33718323	33718323	33718323	RCAACTATAACRTCTCCTATTTCCTAAACRCCTCTATTCCATTATTAACC	0.00960402	NA		II			TTGCCCTGTCCGCAGCTGTAGCGTCTCCTGTTTCCTGGGCGCCTCTATTCCATTGTTGGC[CG]AGGGGGTCAGGACCCGCCGCCTTCTGCATTATTGATGGTCCTGTAAGGCGGGCACCTCGG	37	17	73583945	CGGCCAACAATGGAATAGAGGCGCCCAGGAAACAGGAGACGCTACAGCTG	17	71095540	R			NA	NA	MYO15B	NR_003587	TSS200	chr17:73583838-73586337	Island	high-CpG:71095432-71096174		NA	17:71095472-71097932	17:73583709-73584042	Promoter_Associated_Cell_type_specific	NA
cg00204748	45754380	45754380	45754380	ACCTTTTTATCTAATTTCTCTAACTTCAAATTCCTCTATAACCAAAATAC	0.00104163	NA		II			GCCCCTCTCATTGCTCTTTAGAAGTAATTTAAATTTTTCTGCTACATTGTCTGCTCAGCT[CG]TATTCTGGTCATAGAGGAACCTGAAGCCAGAGAAACTAGACAAAAAGGTAAGAGAAAACC	37	12	29376779	CCTTTTTGTCTAGTTTCTCTGGCTTCAGGTTCCTCTATGACCAGAATACG	12	29268046	F			NA	NA	FAR2	NM_018099;NM_018099	1stExon;5'UTR					NA				NA
cg00205157	56787509	56787509	56787509	AACACCATTTTTACCTACTACAATTCTCTTAAAATCTTATTAATCTCTCC	2.11e-05	NA		II			TTGATTTTAGAAACACCATTTTTACCTACTGCAGTTCTCTTAAAGTCTTATTAGTCTCTC[CG]CCAAACAGAGCTTTCTTCATGTTTTAATTCATGTATACATCTCTCTAACTGACACAATTT	37	6	66496346	ACACCATTTTTACCTACTGCAGTTCTCTTAAAGTCTTATTAGTCTCTCCG	6	66553067	R			NA	NA	MCART3P	NR_026540	TSS1500	chr6:66497675-66498033	N_Shore			NA				NA
cg00205703	39773423	39773423	39773423	TTTATACTTCCCTTAAAAAATTCTAAAATTTATAATCCTAAATTAACCTC	0.0173208	NA		II			ACTGGCTGAGATTTGTACTTCCCTTGAGGAATTCTGGGATTTGTAGTCCTAAGTTAACCT[CG]TGGCTTTTGAAGCTGAGGAGCAGCTGACTGCTCTGATCTCTCTGGCCCTATCAAGGCTTG	37	3	184054901	TTGTACTTCCCTTGAGGAATTCTGGGATTTGTAGTCCTAAGTTAACCTCG	3	185537595	R			NA	NA	FAM131A	NM_001171093;NM_144635	5'UTR;TSS1500	chr3:184056419-184056671	N_Shore			TRUE				NA
cg00205756	72607301	72607301	72607301	AAACAAAATCTCCCCACCTTTCTCRAATACAAAACCAAAATAACACAACC	1.01e-07	NA		II			TAATCCCAAAAGAACAAAGTCTCCCCACCTTTCTCGGATGCAGGGCCAGAGTGACACAGC[CG]AAAAATTGCAGTTTGTCTGTACTTCTGTTTGAACTTTCCACGTTGTCCTGTTTACAAGTT	37	16	7762118	CGGCTGTGTCACTCTGGCCCTGCATCCGAGAAAGGTGGGGAGACTTTGTT	16	7702119	R			NA	NA	A2BP1	NM_001142334;NM_145893;NM_018723;NM_145891;NM_001142333;NM_145892	3'UTR;3'UTR;3'UTR;3'UTR;3'UTR;3'UTR					NA				NA
cg00206058	43747445	35740383	43747445	CTTCAAAAAATTAAAAAAATTCTACATAATCTCCAACATCTCCACCAACA	0.0088085	35740383	CTTCGAAAAATTAAAAAAATTCTACGTAATCTCCAACGTCTCCACCGACG	I	T	Red	TGCAGCACTACGCGGCCGCCCTGATGGCCGTAAGCGGCCTCCCGCAGATGAAGAACTACA[CG]TCGGTGGAGACGCTGGAGATCACGCAGAACCTCCTCAACTCCCCGAAGCAGTGCCCCTGC	37	2	11750918	CGTCGGTGGAGACGCTGGAGATCACGCAGAACCTCCTCAACTCCCCGAAG	2	11668369	F			NA	NA	GREB1	NM_014668	Body	chr2:11750766-11751072	Island			NA	2:11668225-11668523			NA
cg00206271	45663364	46713385	45663364	AACTCCCCTAAAATCAACATCTACTAATAACTCAAACCCCATAACATCCA	4.07e-05	46713385	AACTCCCCTAAAATCAACATCTACTAATAACTCAAACCCCGTAACATCCG	I	A	Red	AGGCCAGGCCCAGGCTCCCCTGAAGTCAACATCTGCTGGTGGCTCAAACCCCGTGGCATC[CG]ACCTGGAATGAGGATCTCCGTCTGCGCCGGACGTTTTCTGTAATGGAATCCCGCACAAAG	37	2	1166205	CGGATGCCACGGGGTTTGAGCCACCAGCAGATGTTGACTTCAGGGGAGCC	2	1156205	R			NA	NA	SNTG2	NM_018968	Body	chr2:1163016-1163820	S_Shelf			NA	2:1156067-1156333			NA
cg00206463	68698462	68698462	68698462	TTACCAAATTTACCAAACTATTTAAAATTAAAACAAAATCACATAAATAC	5.16e-08	NA		II			GGGAAAATATTTTGCCAAGTTTACCAGGCTATTTGAGGTTGAGGCAAGGTCACATAAGTA[CG]AGTGTCTCATTAGCAAAAAGCTCTATAAAAATACTATGAAAGAGCACAGGAGCCAATGTG	37	6	30179435	TGCCAAGTTTACCAGGCTATTTGAGGTTGAGGCAAGGTCACATAAGTACG	6	30287414	R			NA	NA	TRIM26	NM_003449	5'UTR	chr6:30180933-30182187	N_Shore			NA				NA
cg00206542	44795348	44795348	44795348	AAAAAACCATATCATTTATAAACTATACTACTCAATTTTTTTTCTTTATC	1.33e-06	NA		II			CTTCTGGGAGCAGAAGACCATATCATTTGTGGGCTGTGCTGCTCAGTTTTTTTTCTTTGT[CG]GCATGGGTCTGTCTGAGTGCCTCCTCCTGACTGCTATGGCATACGACCGATATGCAGCCA	37	11	59210965	GAAGACCATATCATTTGTGGGCTGTGCTGCTCAGTTTTTTTTCTTTGTCG	11	58967541	R			NA	NA	OR5A1	NM_001004728	1stExon					NA				NA
cg00206999	56699384	56699384	56699384	AACACCTAAAAAAACCTTCRACCACCTCTAATTAAACCCCTACTATAATC	0.00113475	NA		II			GGAAAACACGGAAGAGTAGCCAGGCCAAGCTGGGGTTTAACTGTCCCTAAAAGAAAGAAA[CG]ACCATAGCAGGGGTTTAACCAGAGGTGGCCGAAGGCCTTTCCAGGTGCCCATTTCTCCCG	37	3	58222569	CGACCATAGCAGGGGTTTAACCAGAGGTGGCCGAAGGCCTTTCCAGGTGC	3	58197609	F			NA	NA	ABHD6	NM_020676	TSS1500	chr3:58223101-58224364	N_Shore			NA		3:58222569-58224545	Promoter_Associated	NA
cg00207279	74743473	74743473	74743473	AAATAAACTTAAAATTTACCRCTCACCTAAATTAACRTCRTAACAAATAC	1.44e-07	NA		II			CACATGGCACTGGGTGAGCTTGGAGTTTGCCGCTCACCTGGATTAGCGTCGTGGCAGGTG[CG]GCCGTGGCAGGTGTCGACTGCATTAAACCCTGGGCTGTCTCTGCTCGAGACCTGCCGGCG	37	7	778962	GGTGAGCTTGGAGTTTGCCGCTCACCTGGATTAGCGTCGTGGCAGGTGCG	7	745488	R			NA	NA	HEATR2	NM_017802	Body	chr7:780239-780601	N_Shore			NA	7:745488-745616			NA
cg00207794	63809352	63809352	63809352	AAACACAAATAAAAAACTTCRCTAAACTAAAACATCAACAAATCAAACRC	3.56e-10	NA		II			GCTGTCGCCCGGGGCACAGGTGAGGGGCTTCGCTGGGCTGAGGCATCAACAGGTCAAGCG[CG]TCATTGAGGACCGAGGCTCTAGAAAAAGCTCTGAGGCGGCACGTGGTGTTTTGAGCAGAA	37	3	24161207	CGCGCTTGACCTGTTGATGCCTCAGCCCAGCGAAGCCCCTCACCTGTGCC	3	24136211	R			NA	NA	THRB	NM_000461;NM_001128176;NM_001128177	3'UTR;3'UTR;3'UTR					NA	3:24136156-24136225			NA
cg00207833	54742459	54742459	54742459	TAAAAATCACTTATATTCATTTAATACAAATCTAAAACRCAACRAACTCC	0.0316323	NA		II			GTTCTCCAAACTGAAGATCACTTGTATTCATTTGGTGCAGGTCTAAGGCGCAGCGGGCTC[CG]TAAGAGCACCCCAGGAACGCACAGCCCTGAGAGCCCGCCCGGGTCTTCCTTTTGCACCAG	37	15	23085646	CGGAGCCCGCTGCGCCTTAGACCTGCACCAAATGAATACAAGTGATCTTC	15	20637087	R			TRUE	NA	NIPA1	NM_144599;NM_001142275	Body;5'UTR	chr15:23085441-23086898	Island			NA	15:20636843-20638330	15:23085388-23087046	Promoter_Associated	NA
cg00208153	34676389	34676389	34676389	AACAACRAAAACAAAATCACAAATATATTTTAAAACTTCCCCAACRCACC	8.97e-07	NA		II			CTAAATGCAGCAAAACACTGCCTGAAAACAGACCGGCCCGCGCAGCAAGCAGACATTTCA[CG]GTGCGCTGGGGAAGCTTCAAAATATATCTGTGACTCTGTCTTCGTTGCTCTTCATCCCCA	37	13	58206058	CGGTGCGCTGGGGAAGCTTCAAAATATATCTGTGACTCTGTCTTCGTTGC	13	57104059	F			NA	NA	PCDH17	NM_001040429;NM_001040429	5'UTR;1stExon	chr13:58206526-58208930	N_Shore		DMR	NA	13:57103550-57107135	13:58205826-58206181	Unclassified_Cell_type_specific	NA
cg00208504	71677475	71677475	71677475	CACACTACAACTCCCCCTTTAATTAATTACTAAATATTCTACTTTTTCTC	9.89e-06	NA		II			AGCCTCCAGTTCACACTGCAACTCCCCCTTTAGTTAATTGCTGAGTATTCTGCTTTTTCT[CG]CGTATCCTCAGAACCAAAGGTGTCGATATTTGGACTACAGAGCCAAGCAGTTGCAGGACG	37	4	140200520	ACACTGCAACTCCCCCTTTAGTTAATTGCTGAGTATTCTGCTTTTTCTCG	4	140419970	R			NA	NA	C4orf49	NM_032623	Body	chr4:140201064-140201449	N_Shore		RDMR	NA		4:140200227-140201154	Unclassified_Cell_type_specific	NA
cg00208734	63720346	12709502	63720346	CTTAAAATAACCCTATCACCAATTCTAACACATAAAAAAACAACAAACCA	0.0168044	12709502	CTTAAAATAACCCTATCGCCAATTCTAACGCGTAAAAAAACAACAAACCG	I	C	Grn	GCCCCAGGCGCCCTTAAAGTGGCCCTGTCGCCAGTTCTGGCGCGTGGGGGAGCAGCAGGC[CG]CTCTGAGGGGTCAACGCGGAACCCGGGTCGGGGGCCTGCCCGCGGGGGCTACTCAAGCTG	37	13	36788843	CGGCCTGCTGCTCCCCCACGCGCCAGAACTGGCGACAGGGCCACTTTAAG	13	35686843	R			NA	NA	SOHLH2	NM_017826	TSS200	chr13:36788414-36789038	Island			NA	13:35686342-35687038			NA
cg00209038	30757356	10722404	30757356	ACACTATATACTCACAATCAAATAAAACCAACCATAAAACCAAAACAACA	0.00159497	10722404	ACGCTATATACTCACAATCGAATAAAACCGACCGTAAAACCGAAACAACG	I	C	Grn	GCCGCGACGGGAGCGCTGTGTACTCACAGTCGAGTGAGACCGGCCGTGGGGCCGGGGCAG[CG]CAGGGCGCCGTCGGGCACGCAGTTGCAGGGCTCAGGGCAGAGCGCCTCGCGCAGCGCTCG	37	2	48982683	CGCTGCCCCGGCCCCACGGCCGGTCTCACTCGACTGTGAGTACACAGCGC	2	48836187	R			NA	NA	LHCGR	NM_000233	1stExon	chr2:48982621-48982958	Island			TRUE	2:48836126-48836430			NA
cg00209520	39740488	39740488	39740488	ATTATCCCAAAAAAAAACTTATTTCTAACATCTTCCCTAAAATAACAAAC	0.00784585	NA		II			GGAGAATACACATTGTCCCAAAGAGAAACTTGTTTCTAACATCTTCCCTAAGATGGCAAA[CG]GGTCCAAGACTTTGTGCGTGTGTGTGTGTGTGTGTCCCCACCTTTAAACTTCAAACCCCA	37	2	98962546	TTGTCCCAAAGAGAAACTTGTTTCTAACATCTTCCCTAAGATGGCAAACG	2	98328978	R			NA	NA	CNGA3	NM_001298;NM_001079878	TSS200;TSS200	chr2:98962873-98964187	N_Shore			NA				NA
cg00210210	33708325	33708325	33708325	TAATTCTAAATAAAACTCCCATAAATAAATTACAAAAAATAAAACCCAAC	0.00458689	NA		II			AGTAATGTGTGTGGTTCTAAGTGAGGCTCCCATAAGTAGGTTGCAAGGAGTGAAACCCAA[CG]GCCTCCTGGGGTGACTGAGGTGGTCACCAGCCGGTCTTTCAAGGAGAGAGGCCAGAAGGC	37	6	99798738	GGTTCTAAGTGAGGCTCCCATAAGTAGGTTGCAAGGAGTGAAACCCAACG	6	99905459	R			NA	NA	C6orf168	NM_032511	TSS1500	chr6:99797208-99797946	S_Shore			NA				NA
cg00210249	22658312	22658312	22658312	ACACCTAACTACCTCTCCCCTACAACATTAAACTCATTCTATCATTAATC	0.00360398	NA		II			CTTCTATCTCTACACCTGGCTGCCTCTCCCCTGCAGCATTGGGCTCATTCTGTCATTGGT[CG]GTGCTTGACCGGGGCTGGAGCTGTGCGGTGAGCTGATTGGCTGTCAGTATGCAGAGCCCA	37	10	71135679	CACCTGGCTGCCTCTCCCCTGCAGCATTGGGCTCATTCTGTCATTGGTCG	10	70805685	R			NA	NA	HK1	NM_033500;NM_000188;NM_033498;NM_033497;NM_033496	Body;Body;Body;Body;Body					TRUE				TRUE
cg00210856	12772328	12772328	12772328	CTCTTCCCTAAATCATTCTACAAAATAACACAACAAATTCCTCTAAATCC	4.23e-06	NA		II			ACAAGTCAGCCCTCTTCCCTGAGTCATTCTGCAAAATGGCACAGCAGATTCCTCTGGGTC[CG]TCAGAAAAGAAAATCTTTTACACTTTTGTATAACTCTATGCATTAAACCATAAATTATTA	37	5	158466226	CGGACCCAGAGGAATCTGCTGTGCCATTTTGCAGAATGACTCAGGGAAGA	5	158398804	R			NA	NA	EBF1	NM_024007	Body					TRUE				NA
cg00211403	13746389	13746389	13746389	AATCTCAAATCAAATCTAAATTTAACCAATAACTTCCCTCTCCACRCTTC	8.53e-05	NA		II			TAAGAGACCTAGGTCTCAGATCAGATCTAAGTTTGACCAGTGACTTCCCTCTCCACGCTT[CG]GCTCCTCCACTGTAGGATGGGAAGTTCACAGTTCCTACTTTACAGGGCTGAGAGGACTAA	37	12	108525241	GTCTCAGATCAGATCTAAGTTTGACCAGTGACTTCCCTCTCCACGCTTCG	12	107049371	R			NA	NA	WSCD2	NM_014653	5'UTR	chr12:108522950-108523852	S_Shore			NA				NA
cg00211489	69727348	69727348	69727348	TTATTCAAAAATTACTCTCATCTCCTCCAAATCTTTACTCAAATATTCTC	0.00229391	NA		II			AATGGGTTTAGGAGGAGGGAGTGTTTTCATTTGAAATAGAGTAATTGGGGTAGACCACAC[CG]AGAACATTTGAGCAAAGACTTGGAGGAGATGAGAGCAATCCCTGAATAACACATGAAGAA	37	15	40826026	TATTCAGGGATTGCTCTCATCTCCTCCAAGTCTTTGCTCAAATGTTCTCG	15	38613318	F			NA	NA	MRPL42P5	NR_002208	TSS1500					NA				NA
cg00211661	10774448	10774448	10774448	ATCCCTAATCTTCCTAAAAACTAATCACTTATTACCAAAACAAAACTTAC	0.00288387	NA		II			TCTCCACCACTCCACCCGCATAAGGAGACAGAGAGGCTAGGAAAGAGGCTCTCTGAAGGG[CG]CAAGTTCTGCCCTGGCAACAAGTGATCAGCCTCCAGGAAGACCAGGGATTGGCTGGACTG	37	11	72433619	TCCCTGGTCTTCCTGGAGGCTGATCACTTGTTGCCAGGGCAGAACTTGCG	11	72111267	F			NA	TRUE	ARAP1	NM_001040118;NM_001135190;NM_015242	Body;TSS1500;TSS1500					TRUE		11:72432591-72434003	Promoter_Associated	NA
cg00211821	43688493	43688493	43688493	TCTTCAAAATAAAACTTTTTAACTATATTATTCATATCCTATTTCCTAAC	4.47e-05	NA		II			CCTGTTTTGTATCTTCAGGATGAAGCTTTTTGACTGTGTTGTTCATGTCCTATTTCCTGG[CG]CCTGGCACACACTGACACTCACATATTTGTTGAATAACATGTCATTTTTTCCTGATCTTG	37	17	16978673	CTTCAGGATGAAGCTTTTTGACTGTGTTGTTCATGTCCTATTTCCTGGCG	17	16919398	R			NA	NA	MPRIP	NM_015134;NM_201274	Body;Body					TRUE				NA
cg00211961	29782452	29782452	29782452	CRCTTTTACATCAAAACCATCATACRAATTCCACAAATACAACAAACATC	0.00248007	NA		II			TGATCCACCTGCCTCAGCCCCCAAAGTGCTGGGATTACAGGTGTGAGCCACCACACCCAG[CG]ATGTCTGTTGCATTTGTGGAACCCGCATGATGGTTTTGATGTAAAAGCGCATTGATCTGA	37	6	32042099	GCTTTTACATCAAAACCATCATGCGGGTTCCACAAATGCAACAGACATCG	6	32150077	F			NA	NA	TNXB	NM_019105	Body					NA				NA
cg00212470	29697421	29697421	29697421	AATTACAAACCCTAACAACCTAACCCTTATTTTCCTCCTTAATATTTATC	0.00140919	NA		II			TTTCATTCTAGTGGAAGGAGAATAAGTGATAAATAAGTAAAACTGGAATATGTCAGACAA[CG]ATAAATACTAAGGAGGAAAATAAGGGTCAGGCTGTTAGGGTTTGCAATTTTAAATAGGTG	37	1	41301421	ATTGCAAACCCTAACAGCCTGACCCTTATTTTCCTCCTTAGTATTTATCG	1	41074008	F			NA	NA	KCNQ4	NM_004700;NM_172163	Body;Body	chr1:41303355-41304436	N_Shore			TRUE				NA
cg00212520	37649409	37649409	37649409	TCATCAAATTCATCAAAATATACCATCTACAATTCTTCCAAAACCTATTC	0.0051275	NA		II			CAGAAGCCAGTTCATCAGGTTCATCAGGGTGTGCCATCTACAGTTCTTCCAGAACCTATT[CG]CCTCTCATCTTTTCTGCCATCATCCTAATCCAGACCACCATCACCTCTAAGGTGGAGACT	37	3	42451096	CATCAGGTTCATCAGGGTGTGCCATCTACAGTTCTTCCAGAACCTATTCG	3	42426100	R			NA	NA	LYZL4	NM_144634	5'UTR					NA				NA
cg00212521	55691478	55691478	55691478	ACAAAACTTTATCTAAAATCCACTTTCAACCCCAAAAAAACATAAAAAAC	0.00018535	NA		II			ACTTCCCCCACGGAAGAGGGCGGGGTGCTGACACTGCCTCCTGTGGATGGGCTGCCAGGG[CG]TCCTCCATGCCCCCCTGGGGCTGAAAGTGGACCTCAGACAAAGTTCTGTTCAGAGATTTC	37	1	240370408	CAGAACTTTGTCTGAGGTCCACTTTCAGCCCCAGGGGGGCATGGAGGACG	1	238437031	F			NA	NA	FMN2	NM_020066	Body	chr1:240370859-240371526	N_Shore			NA				NA
cg00213044	63668327	63668327	63668327	TAAAAACCCTAAAATACCCCATAAAAAACATAACACTAACTCACCTTATC	8.18e-08	NA		II			CTCCTCTGGTCTGGGGACCCTGAAGTGCCCCATGGAGGGCATGGCACTGGCTCACCTTGT[CG]ATGAAGGAGGCAAACTTGTTGTTGAGGGTCTTGATCTGTTCACGCTCCTCAGCCCGCACC	37	12	52886438	CGACAAGGTGAGCCAGTGCCATGCCCTCCATGGGGCACTTCAGGGTCCCC	12	51172705	R			NA	TRUE	KRT6A	NM_005554	1stExon					NA				NA
cg00213123	20655373	26613377	20655373	AAAATACAAACACATACAAACTACCTCTCCTCACAAACAAAAACCACACA	0.00329207	26613377	AAAATACGAACACATACAAACTACCTCTCCTCGCAAACAAAAACCACACG	I	C	Grn	GTCGAAGGGTGGCGGGTGCGCGATTGAATAAGGGGATGCGGTGCAAAGGGTCTAGGTCTG[CG]TGTGGCTTCTGCCTGCGAGGAGAGGCAGCCTGCATGTGTCCGCATTTTCGGTCCACGCCT	37	15	75019070	AAAATGCGGACACATGCAGGCTGCCTCTCCTCGCAGGCAGAAGCCACACG	15	72806123	F			NA	NA	CYP1A1	NM_000499	TSS1500	chr15:75018186-75019336	Island			TRUE	15:72805240-72806509	15:75017651-75019215	Unclassified_Cell_type_specific	TRUE
cg00213177	61769378	61769378	61769378	AACACTTAATTATATACTTAACTATATTAAAACACATATATACACTATCC	0.0208296	NA		II			ATGCTAAAGCTCAAATTTGGACACACTTACTCAGTTGTTAAGGGAGATGAAGAGGGCCCT[CG]GATAGTGTATATATGTGTTTCAATACAGTTAAGTACACAATCAAGTGCTCTTATTTCATC	37	12	51690687	CGGATAGTGTATATATGTGTTTCAATACAGTTAAGTACACAATCAAGTGC	12	49976954	F			NA	NA	BIN2	NM_016293	Body					TRUE				NA
cg00213301	47650476	47650476	47650476	AACCCACTTAAAACTTATAAATATTTCTAAATCCTTACTATTAATCTCCC	2.26e-05	NA		II			AAGCAAAATTAGACCCACTTAGAGCTTGTGGGTGTTTCTGGGTCCTTGCTATTGATCTCC[CG]GGTCACCAAAACAACTCAGCAGCTCCTGCAGGTGTGTCCTCCGAAGGCATGGGAAGAGAG	37	15	37170017	ACCCACTTAGAGCTTGTGGGTGTTTCTGGGTCCTTGCTATTGATCTCCCG	15	34957309	R			NA	NA	LOC145845	NR_024264	Body	chr15:37172473-37173018	N_Shelf		RDMR	NA				NA
cg00213668	18661499	18661499	18661499	AAAATCTAATATCCACTAAAATACAAAAATACAAAACACCACTACCTTCC	0.00073238	NA		II			CTCAAGTTGCAATCGCAGCTCAGACTGGGAAGATACACAGGGCTGTTCTTGGAAGAAGGG[CG]GAAGGCAGTGGTGTTCTGTATTTTTGCACCCCAGTGGACATCAGACTCTGCCTCAAATTT	37	7	98028207	GAGTCTGATGTCCACTGGGGTGCAAAAATACAGAACACCACTGCCTTCCG	7	97866143	F			NA	NA	BAIAP2L1	NM_018842	Body	chr7:98030097-98030422	N_Shore			NA				NA
cg00213729	16662414	16662414	16662414	TATAATAAATAATTTCTAAACCCATCTTATCTAAATTATCTACCTTTCTC	0.00161702	NA		II			CTGCCCTAGCCTATGATAAATAATTTCTGAGCCCATCTTGTCTGGGTTGTCTGCCTTTCT[CG]GGCTTGTTCACAAATAAATCTCTCTCCGACTGTGCGTTCTGGTGCAACTGAGAGCTCTGG	37	6	71668029	ATGATAAATAATTTCTGAGCCCATCTTGTCTGGGTTGTCTGCCTTTCTCG	6	71724750	R			NA	NA	B3GAT2	NM_080742	TSS1500	chr6:71665360-71667132	S_Shore			NA				NA
cg00213745	56806364	56806364	56806364	CAACRTAACTACAAAAACAACCCTAAATATAATATAAAAAAACTCTAACC	0.000558036	NA		II			ACCAGCAACTTCAACGTGGCTACAAAAACAACCCTAAGTGTGATGTAAAGGAGCTCTGGC[CG]TGCGGTCACTGTGGGAAAAGGTTAGTTCACCATCTTTTCATTTACATGTCTCCCCACTCC	37	3	124730836	CGGCCAGAGCTCCTTTACATCACACTTAGGGTTGTTTTTGTAGCCACGTT	3	126213526	R			NA	NA	HEG1	NM_020733	Body					TRUE				NA
cg00213967	46746418	18803385	46746418	TAACATAATAAACAAAACTTAAAATAAACCAATAACTCAATAAAAAAACA	0.0305025	18803385	TAACATAATAAACGAAACTTAAAATAAACCAATAACTCGATAAAAAAACG	I	A	Red	CGGGGCCTGGGCTGGCATGGTGGGCGGAGCTTAGGGTGAGCCAATGACTCGGTAAAGGGG[CG]GAGCTTGGGCCGCAGTGCAGCCAGGGCCTAAGGGTGGGCCGTCTGCCTTGGTAGGGAGGA	37	3	12851900	CGCCCCTTTACCGAGTCATTGGCTCACCCTAAGCTCCGCCCACCATGCCA	3	12826900	R			NA	NA	CAND2	NM_001162499;NM_012298	Body;Body	chr3:12851516-12851823	S_Shore			TRUE	3:12826546-12826913	3:12851281-12852840	Promoter_Associated	NA
cg00214012	20679439	20679439	20679439	ATATAATTAAACTCAATATCTAACCTTCCCAAAAATCAAACTAATAACCC	0.0177633	NA		II			AATTGTTGGCCATGTGGTTGAGCTCAATATCTAGCCTTCCCAGAAGTCAGGCTGGTAGCC[CG]TGTCTCCTGTCTCAAAGCCCCAACCCTCTAGTAGCTAGTTGGCCTCTCTGGCATCACCAA	37	15	29326467	CGGGCTACCAGCCTGACTTCTGGGAAGGCTAGATATTGAGCTCAACCACA	15	27113759	R			NA	NA	APBA2	NM_005503;NM_001130414	5'UTR;5'UTR					TRUE				NA
cg00214250	14723401	36747390	14723401	AACATAAACCAATATAATTAACAAAAAACACACACAATAAAAACAACACA	0.0190431	36747390	AACGTAAACCGATATAATTAACGAAAAACACACACAATAAAAACGACGCG	I	T	Red	GAGGAGCTGGAAGGCGTGGGCCGGTGTGATTAACGAGAAACACACACAGTGAGGACGACG[CG]TGGGAGCAGGGGAAGTCATCTTCCTAGGACAGGTGCCTTCACTCGCATCAAACTACTCAT	37	7	157711173	CGCGTCGTCCTCACTGTGTGTGTTTCTCGTTAATCACACCGGCCCACGCC	7	157403934	R			NA	NA	PTPRN2	NM_002847;NM_130842;NM_130843	Body;Body;Body					NA	7:157403888-157403980			NA
cg00214688	16716331	16716331	16716331	ATCTTCACTATTAACTTCATCTATACTACATTCACAATATCTACCAACAC	0.00112065	NA		II			TAAGCATCCATGTCTTCACTGTTAACTTCATCTGTGCTGCATTCACAATGTCTACCAACA[CG]CCCTTCATTGCACCTGAAGAAACATGCCAAAATTGCAATCACACAAAACAAAAATAATTT	37	10	33201038	TCTTCACTGTTAACTTCATCTGTGCTGCATTCACAATGTCTACCAACACG	10	33241044	R			NA	NA	ITGB1	NM_033668;NM_133376;NM_002211;NM_033667;NM_033669;NM_033666	Body;Body;Body;Body;Body;Body			low-CpG:33241039-33241046		NA				NA
cg00214970	68673455	68673455	68673455	CTACATTTCACCATCTATAAACTCTAAAAATATAAATCAATCCCCTAAAC	0.00482151	NA		II			AAGTAGGGAGCCTACATTTCACCATCTGTAGGCTCTAAGGATGTAAGTCAGTCCCCTGGG[CG]AGGTGGTGTCAGAGGAGACTAAGTAGGGACCAGGACTTTCATCCCCTCCAAACACTGGCC	37	2	229047701	CGCCCAGGGGACTGACTTACATCCTTAGAGCCTACAGATGGTGAAATGTA	2	228755945	R			NA	NA	SPHKAP	NM_030623;NM_001142644	TSS1500;TSS1500	chr2:229045957-229046553	S_Shore			NA				NA
cg00215019	28615377	28615377	28615377	TAATCAAATCAACACATAAAATTAACCAACACTCTTATATAAACCAATCC	2.56e-06	NA		II			ATCGTTTAGCCTAGTCAAGTCAACACATAAAATTAACCAACACTCTTATGTAGACCAATC[CG]TGGGGAAAAGGCATTTTCAATGCTGGTGGTAATATAAATTTGTAAACTATTTTAGAGGTC	37	10	50311040	CGGATTGGTCTACATAAGAGTGTTGGTTAATTTTATGTGTTGACTTGACT	10	49981046	R			NA	NA	C10orf72	NM_001031746;NM_144984	Body;3'UTR					NA				NA
cg00215066	57657390	57657390	57657390	ACAAAAACCTAAAATCACATTAAAAAACAAACAAACCCTCACRAAATATC	0.0277081	NA		II			CATGAGCCACTGCAGGAGCCTGAGGTCACATTGAAGGACAGACAGACCCTCACGGGATGT[CG]TGACTGGTTGCCTCTGGCTTTTTGGGCGAGCCTAGTCGGGTGGGGAACTCCAGCATCGGG	37	19	17212316	CAGGAGCCTGAGGTCACATTGAAGGACAGACAGACCCTCACGGGATGTCG	19	17073316	R			NA	TRUE	MYO9B	NM_004145;NM_001130065	5'UTR;5'UTR	chr19:17212479-17213332	N_Shore			NA				NA
cg00215182	41712471	41712471	41712471	AATAAATAACAAATTTAATTCTACCAACTCAACAACTATAAAAAAAACAC	0.00324089	NA		II			AAGAAGATCACGAGGTCAGAGAGCCTGGGAGGGTGAGCTGTGGATGTTCCCCCAGGACAG[CG]TGTTCTCCCCACAGCTGCTGAGTTGGCAGAACCAAACTTGCCACCCACCCGTCTCATTTA	37	1	22979495	GTGGGTGGCAAGTTTGGTTCTGCCAACTCAGCAGCTGTGGGGAGAACACG	1	22852082	F			NA	NA	C1QB	NM_000491	TSS200					NA				NA
cg00216138	67622432	67622432	67622432	TAACCCTTTTTATACCTCAATCCCAAAAACTTTCTTTATTTTCCAACACC	0.00360271	NA		II			TGGGGTTCATTTAACCCTTTTTGTGCCTCAGTCCCAAGAACTTTCTTTGTTTTCCAGCAC[CG]GGGAGAGAGGCTGTCGGGAAGAGTGGGGCTGGAGTGGCCGGGCAGAGGTTCACACTAGAG	37	15	37171175	AACCCTTTTTGTGCCTCAGTCCCAAGAACTTTCTTTGTTTTCCAGCACCG	15	34958467	R			NA	NA	LOC145845	NR_024264	Body	chr15:37172473-37173018	N_Shore		RDMR	TRUE				NA
cg00216570	61716367	61716367	61716367	AAAACRATATACTATAACCCTAACTACCCCTATACCAAAAAACAAAAACC	0.00347519	NA		II			ACACACAGTGCAGCCTGAAGGGTGGGAGGGAGGTGCCCCTGGCCCTCCCAGCCCCCAGGC[CG]GCCCCTGTTCCCTGGCACAGGGGCAGCCAGGGTCACAGCACATCGCCCTCCTCCATGCTG	37	6	41652303	CGGCCCCTGTTCCCTGGCACAGGGGCAGCCAGGGTCACAGCACATCGCCC	6	41760281	F			NA	NA	TFEB	NM_001167827;NM_007162	3'UTR;3'UTR	chr6:41650672-41651582	S_Shore			NA				NA
cg00216655	51783485	51783485	51783485	AAAAAATAATCACAAAAATCCAACTTAAAACTAATAATCAAATTCCRAAC	0.00726357	NA		II			GTGGGGTGTGTCATATTAGAGACAACAGCTGCTTCAAGTTAATAAAATCTGAAATATCTT[CG]CTCGGAACCTGATCACTAGTTTTAAGTTGGATTTCTGTGACTATTTCTCATCTTATGATA	37	3	73606529	CGCTCGGAACCTGATCACTAGTTTTAAGTTGGATTTCTGTGACTATTTCT	3	73689219	F			NA	NA	PDZRN3	NM_015009	Body					TRUE				NA
cg00216901	18649318	18649318	18649318	CAAATTACCRACTCTACCTACCCTTAACACTACRCTTAAATACAATAAAC	0.00966581	NA		II			TTATGAGGCTTGAATGAGTCCGTGTAGTCATTTATTAGCTAATTAAGCATATTCCTTGGG[CG]CTTACTGTACCCAAGCGCAGTGCTAAGGGCAGGTAGAGTCGGTAACCTGGGTCTGTCCCT	37	20	36156919	AGGTTACCGACTCTACCTGCCCTTAGCACTGCGCTTGGGTACAGTAAGCG	20	35590333	F			NA	NA	BLCAP	NM_001167820;NM_001167822;NM_001167821;NM_006698	TSS1500;TSS1500;TSS1500;TSS1500	chr20:36156022-36156669	S_Shore			NA		20:36155422-36157045	Promoter_Associated	NA
cg00217055	67749458	67749458	67749458	ATAACCTACACATTAACRTCAACAAACTTAACTCAATTAAAATAAAAAAC	3.83e-09	NA		II			CACACGCATTAGCGGACGCTCCACACGCAGCCACGGAGACAGTAGAGGGAAAACCAGTCG[CG]TTTCCCATCCTAACTGAGCCAAGCCTGTTGACGCCAATGTGCAGGCTACTGTGACCTGAT	37	17	76798820	TAGCCTGCACATTGGCGTCAACAGGCTTGGCTCAGTTAGGATGGGAAACG	17	74310415	F			NA	NA	USP36	NM_025090	Body	chr17:76798154-76798461	S_Shore			NA	17:74310359-74310416			NA
cg00217795	10727422	10727422	10727422	TCTCTATAACTCRATCATTCTACTCAAACACRTAATACTACTATTAAACC	0.0202462	NA		II			ACGCAGCGCAGTCCCTCTGAGGTCAGCATGCGCCGCCACTCTCCGCGAGTGGACTTGGAG[CG]GCTCAACAGCAGCACCACGTGCTTGAGCAGAATGACCGAGTCATAGAGAGCCAGGAAGAG	37	14	80677688	CGGCTCAACAGCAGCACCACGTGCTTGAGCAGAATGACCGAGTCATAGAG	14	79747441	F			NA	TRUE	DIO2	NM_013989;NM_001007023;NM_000793	1stExon;1stExon;Body					NA				NA
cg00217859	45733466	45733466	45733466	TCTATATTACCCAAACTAATTTCACATTCCAAAACTCAAACAATCCTTTC	0.0246374	NA		II			ATAAAACCTGCCAGGTGTAGTGGTGCGCGCCTAGAGTCCCAGCTATTAAGGAGGCTGAGG[CG]AAAGGATTGCCTGAGCCCTGGAATGTGAAACCAGCCTGGGCAACATAGAGAGACCCCCAT	37	16	69789140	CTATGTTGCCCAGGCTGGTTTCACATTCCAGGGCTCAGGCAATCCTTTCG	16	68346641	F			NA	NA	NOB1	NM_014062	TSS1500	chr16:69788469-69788984	S_Shore			NA		16:69788281-69789428	Promoter_Associated	NA
cg00217953	24675346	24675346	24675346	CRAACAACTACACCAACTAAAAACRAAAACCRACAAAAAACAACTTCTAC	0.00024997	NA		II			GCAGTCGGCCACGGGCAGCTGCACCAGCTGAGAGCGGGAGCCGGCAAAGAGCAGCTTCTG[CG]AGAAAAGCGGGGCGCAGGAGGGGGGTCGGCCAGGGCCACACCACGGGAGGGGCGGCCGGA	37	2	97527635	CGCAGAAGCTGCTCTTTGCCGGCTCCCGCTCTCAGCTGGTGCAGCTGCCC	2	96891362	R			NA	NA	SEMA4C	NM_017789	Body	chr2:97527489-97527704	Island			NA	2:96891217-96891421			NA
cg00218707	37649328	37649328	37649328	TCCATTTAAATACTAAAACCACTCACTTTTATTTATATTTCTAATTTACC	0.000128716	NA		II			AATTCATTTACTCCATTTGAATGCTAGAGCCACTCACTTTTATTTGTGTTTCTAATTTAC[CG]TTTAAATTTATTTGTAAAAAGTTAAGGGAGAGTTGGTCTTTCCCTGATGTTCTTTCTGGC	37	15	75587027	CGGTAAATTAGAAACACAAATAAAAGTGAGTGGCTCTAGCATTCAAATGG	15	73374080	R			NA	NA	GOLGA6D	NM_001145224	3'UTR					NA				NA
cg00218770	46686502	46686502	46686502	CCTTACRAAACCAATTTATAAAACTTAAACACRTTTCACTAAATCACACC	0.000575111	NA		II			TGTTTGTAATTCCTTACGGAGCCAGTTTATGGAACTTGAGCACGTTTCACTGAATCACAC[CG]CTAGGAGCTGGTCTTTTCCCTTAACCTCTTAGAGAAGCACGACTCAGGATTGTTAGTCAC	37	20	60469025	CGGTGTGATTCAGTGAAACGTGCTCAAGTTCCATAAACTGGCTCCGTAAG	20	59902420	R			NA	NA	CDH4	NM_001794	Body	chr20:60470080-60470335	N_Shore		CDMR	NA				NA
cg00218914	31778407	31778407	31778407	CCTCATTTCCAAAAACACCAAACCTCTTAAATCATACTATTTCCTTACCC	0.000290976	NA		II			GACCTCTCTCACCTCATTTCCAGAGACACCAGACCTCTTGGGTCATGCTGTTTCCTTGCC[CG]AAATGCTTTTCCTTCCCCTTTTGGCTTGGAGAACTCCTTTTTATCCTTTAAGCTCCAGTG	37	3	129146731	CGGGCAAGGAAACAGCATGACCCAAGAGGTCTGGTGTCTCTGGAAATGAG	3	130629421	R			NA	NA	C3orf25	NM_207307	Body	chr3:129147229-129147617	N_Shore			NA		3:129146571-129147832	Promoter_Associated	NA
cg00219210	65752382	65752382	65752382	CACTACCAACACRAAATTAAAATTTAACAAAAAATTATAATCTCCAATCC	5.78e-09	NA		II			CTCTTTCCTGCCACTGCCAACACGAGGTTGGAATTTGGCAGAAAATTGTGATCTCCAGTC[CG]TGTGGTGATGCTGGTGGTGCAGGTTTTGTTTGTTCCTTTCGGGTGGTGACTTCGGCCTTT	37	17	12893648	CGGACTGGAGATCACAATTTTCTGCCAAATTCCAACCTCGTGTTGGCAGT	17	12834373	R			NA	NA	RICH2	NM_014859	3'UTR					NA				NA
cg00219282	36762481	36762481	36762481	AAACAACTACRTCCCTTCCCAAACACCAACAAATAAAATCTCCCACAAAC	2.65e-05	NA		II			GCGCGCCAAGGAGGCAGCTGCGTCCCTTCCCAAGCACCAGCAGGTGGAGTCTCCCACAGG[CG]CAGGGGCAGGTGGCGACCACAGGTCCCAGCGCGGACATGCGGCCTCCCCCGCCAGGCCCA	37	6	159654898	CGCCTGTGGGAGACTCCACCTGCTGGTGCTTGGGAAGGGACGCAGCTGCC	6	159574888	R			NA	NA	FNDC1	NM_032532	Body	chr6:159653233-159655397	Island			NA	6:159573090-159575387			NA
cg00219303	47759419	11653356	47759419	AATAAATAAACTCAAAACCATAACAACCAATAACCACCTCCTCCCTACCA	1.2e-06	11653356	AATAAATAAACTCAAAACCATAACAACCGATAACCACCTCCTCCCTACCG	I	A	Red	GATGTAGGGGCTGATAGGTAGGCTCAGAGCCATGGCAACCGGTGGCCACCTCCTCCCTGC[CG]GCGCCAGGAGCGGAGACTGCAGAGGGACCGGGACTTAGATGAGAGAGGTCTCCCCAGCAG	37	22	38146969	GATAGGTAGGCTCAGAGCCATGGCAACCGGTGGCCACCTCCTCCCTGCCG	22	36476915	R			NA	NA	TRIOBP	NM_007032;NM_001039141;NM_138632	Body;Body;Body	chr22:38141761-38142999	S_Shelf			NA				NA
cg00219598	51798339	51798339	51798339	CCCAATATAAATTCCAAAATAATAAAAATCATCCCAATCTCTAAAAAACC	0.00828847	NA		II			AAAATGACAGAAGCAAATCAAGTAAAACAGTTTGAGTCTTTGGGGATTGAGAGATCAGGG[CG]GTTTCCCAGAGATTGGGATGATTCTCATTATTCTGGAACTCATACTGGGCCATTCTTATT	37	2	64078686	CCAGTATGAGTTCCAGAATAATGAGAATCATCCCAATCTCTGGGAAACCG	2	63932190	F			NA	NA	UGP2	NM_006759;NM_001001521	Body;5'UTR					TRUE				NA
cg00219716	40766444	21767427	40766444	ACCCCAAACACCACTTTACTAATTTAAATAAAAACAACCATACCAAACCA	0.0272024	21767427	ACCCCAAACGCCGCTTTACTAATTTAAATAAAAACGACCGTACCAAACCG	I	C	Grn	GTGGGTCGCCTCCCCCAATCAAGCTGCCGAAGACAGCCAGCCCCGCTTCAAAAGCCCGAG[CG]GCCTGGTACGGTCGCCCCCACCCAAATTAGCAAAGCGGCGTCTGGGGCCGGTGGGAGCGC	37	17	48228143	CGGCCTGGTACGGTCGCCCCCACCCAAATTAGCAAAGCGGCGTCTGGGGC	17	45583142	F			NA	NA	PPP1R9B	NM_032595	TSS1500	chr17:48226223-48228625	Island	high-CpG:45582953-45583531		NA	17:45583088-45583689			NA
cg00220113	11728410	11728410	11728410	TCTACAACCCTATCCTACTAAAAATACTTCCCAAACAAACTACCTTAACC	0.00459998	NA		II			GGCCCTGCAGACTCAACACGCGGACCTCAGGGCTGGGGTCGTGGAGGCCTTGTGCCAGCA[CG]GTCAAGGCAGCTTGTTTGGGAAGCACCTCCAGCAGGACAGGGCTGTAGAGGAACTGAGGT	37	8	142450415	CGGTCAAGGCAGCTTGTTTGGGAAGCACCTCCAGCAGGACAGGGCTGTAG	8	142519597	F			NA	NA	FLJ43860	NM_207414	Body	chr8:142452245-142452510	N_Shore			NA				NA
cg00220225	69652361	69652361	69652361	AAACAAAAACCRTAAAAAAACATAAAAAAATTATCAACAACACCCCACCC	0.000111244	NA		II			AGCCAAGAAGGAGACAGAGCTCTTGTTGAAGTGGGGGAGGGAATCTGAGGGGCTGGGTAG[CG]GGTGGGGTGCTGTTGATAATCTCCCCATGTTCCCCTACGGCCCCTGTTCCTGCCTCCCTT	37	3	50194470	CGGGTGGGGTGCTGTTGATAATCTCCCCATGTTCCCCTACGGCCCCTGTT	3	50169474	F			NA	NA	SEMA3F	NM_004186	5'UTR	chr3:50191971-50193130	S_Shore			TRUE		3:50193725-50194689	Unclassified_Cell_type_specific	NA
cg00220335	42611402	42611402	42611402	AAACAAAAACTAACTTAAAATCACAAACCTAAAAAAACCAAACAAAAACC	0.000319302	NA		II			AGGCAGAGAGAGGGCAGGAACTGGCTTGAGGTCACAGGCCTAAAGAGGCCAGGCAGAAAC[CG]GCTTGCCAGCGCCTCCAGCTACCCCCAGGGACTGGCTGCCTAGAGGGCGTGGAGTCCAGC	37	5	1343783	GGCAGGAACTGGCTTGAGGTCACAGGCCTAAAGAGGCCAGGCAGAAACCG	5	1396783	R			NA	NA	CLPTM1L	NM_030782	Body	chr5:1344545-1345469	N_Shore			NA				NA
cg00220455	10639327	10639327	10639327	TAAATTCCTATACTAATATAAAAAACCCAAAACTATTAAACRCAAAAACC	0.0167584	NA		II			CCTGGGCAACAGAGCGAGACTCTGTCTCAAAAGAAACAAACAAAAGAACTGGAGGTGGCC[CG]GCCCCTGCGTCTAACAGTCCTGGGCCCTCCACACCAGCACAGGAACTCAAGCCTGCAGTC	37	11	67171191	CGGCCCCTGCGTCTAACAGTCCTGGGCCCTCCACACCAGCACAGGAACTC	11	66927767	F			NA	NA	TBC1D10C	NM_198517	TSS1500	chr11:67168616-67169098	S_Shelf			NA		11:67171066-67171908	Promoter_Associated	NA
cg00220661	58677499	58677499	58677499	CTTTACAAATAACATCCTAACCRTATTATACAACTAAACCCATATTATCC	0.00208067	NA		II			CCCCACAGCTTCTTTGCAGATAACATCCTGGCCGTATTATGCAACTGAACCCATATTATC[CG]GGGGAAACTTACCCTCCTCTGCTCTCTAAATCTTCCTTTTCCTTCTGGTTTTGGAGAAAG	37	18	74241269	TTTGCAGATAACATCCTGGCCGTATTATGCAACTGAACCCATATTATCCG	18	72370257	R			NA	NA	LOC284276	NR_015417	Body				RDMR	NA	18:72369833-72370258			NA
cg00220737	53810337	53810337	53810337	AAAAAACCTTTACCAAATAATATTCCTACTACCATCCCAACTAACTTTTC	0.0038735	NA		II			TCTGGCCAAAGGAAAAACCTTTGCCAAATAATGTTCCTGCTGCCATCCCAGCTGGCTTTT[CG]TTTGTCCAAATCGCTCTCTAGTCGTTGTCTTTTCACTTCATAAACGCCACTGAGAATTGT	37	4	44448469	AAAAACCTTTGCCAAATAATGTTCCTGCTGCCATCCCAGCTGGCTTTTCG	4	44143226	R			NA	NA	KCTD8	NM_198353	Body	chr4:44449386-44451133	N_Shore			NA				NA
cg00221654	59705329	53735358	59705329	CCAAAACACAACAACTATTTCCCAACTATATAACCTAAACCAAATAACCA	1.31e-08	53735358	CCAAAACGCGACGACTATTTCCCAACTATATAACCTAAACCAAATAACCG	I	C	Grn	ACCGTGCTAGAGATTGGCGCCCCCAATTTTCTGATGAGCTAACGGAGGCTCAGAGAGGGG[CG]GCCACCTGGTCCAGGTCACACAGCTGGGAAATAGCCGTCGCGCCCTGGAACCTCTGCTCA	37	11	44333030	CCAGGGCGCGACGGCTATTTCCCAGCTGTGTGACCTGGACCAGGTGGCCG	11	44289606	F			NA	NA	ALX4	NM_021926	TSS1500	chr11:44330542-44331761	S_Shore		RDMR	NA	11:44288908-44290148			TRUE
cg00222053	42634306	42634306	42634306	TAAAAATAATTACAAAACCTATAAAATAACTACRCCACACTAAATCCCCC	0.000611397	NA		II			TCTTGCTCCAGATGCTTAGATTTTGCTGAAGAGTTTTAGTCCTGGAAGAGACTGAAGAGC[CG]GGGGATCCAGTGTGGCGCAGTCATCTCATAGGTCCTGTAACTACCCTTAATTGGGGCCTG	37	20	35886417	CGGGGGATCCAGTGTGGCGCAGTCATCTCATAGGTCCTGTAACTACCCTT	20	35319831	F			NA	NA	GHRH	NM_021081	TSS1500					NA				NA
cg00222175	14616353	14616353	14616353	AAAACCTACTTACTTACTCCTCCATATTCTTACRAATTAACCATAACCCC	0.00341187	NA		II			CTTCCTTTGAGATATACTCCAAGAGGAGGCACTGCTGAGCTTCCTGCCTTCATCCTTAGC[CG]GGGTCATGGTTAATCCGTAAGAACATGGAGGAGCAAGCAAGCAGGCTTCACCAAAGAGGC	37	22	34049875	CGGGGTCATGGTTAATCCGTAAGAACATGGAGGAGCAAGCAAGCAGGCTT	22	32379875	F			NA	NA	LARGE	NM_133642;NM_004737	Body;Body	chr22:34046354-34046597	S_Shelf			TRUE				NA
cg00222472	64760413	64760413	64760413	AAAAAAATAATAAAAACACAACAAACCCCRCTTAAAAAACACTTAACTTC	0.0257941	NA		II			GACTCTGCCCTTGAGTTCCCAGCGCAGGCCGCACGTCACCGGCCGCCAGCGCGCGGACCG[CG]AAGCCAAGTGTCCCCCAAGCGGGGCTTGCTGTGTTTTCATCATTTCCCTTGCCTGGCCCG	37	1	164545783	GGGAAATGATGAAAACACAGCAAGCCCCGCTTGGGGGACACTTGGCTTCG	1	162812407	F			NA	NA	PBX1	NM_002585	Body	chr1:164545540-164545917	Island			NA	1:162812014-162812896			NA
cg00222656	15739463	15739463	15739463	CATATAAAATTCCTAATAAAAAATTCACRTCACCAACACCRACTCCTATC	0.00364179	NA		II			TAAAAAAAATTCATGTGAAGTTCCTGATGAAGGGTTCACGTCACCAGCACCGGCTCCTGT[CG]TGTGCCCAACTCCAAGTTACTGCCAAGATCCAGGGAGGGATGTGCTATGTCACCCTGCCC	37	10	134183785	ATGTGAAGTTCCTGATGAAGGGTTCACGTCACCAGCACCGGCTCCTGTCG	10	134033775	R			NA	NA	LRRC27	NM_001143757;NM_030626	Body;Body					TRUE				NA
cg00222799	42618351	42618351	42618351	CTTTTCRTAAACACACCTCTCTAATTTAAACTAAAATCTAAAAAATTCCC	0.00023866	NA		II			GAACGGCCCGCGGGTGTGTGGAGTCTGCGCCCCTGTGGCTTCAGCTGCGTCGGGGGACTG[CG]GGAATCTTCCAGACTCCAGTTTAAATCAGAGAGGTGTGTCCACGAAAAGAGTCAAACTAA	37	21	43655464	CGGGAATCTTCCAGACTCCAGTTTAAATCAGAGAGGTGTGTCCACGAAAA	21	42528533	F			NA	NA	ABCG1	NM_207628;NM_004915;NM_207174;NM_207627;NM_016818;NM_207629	Body;Body;Body;Body;Body;Body	chr21:43654846-43655465	Island			NA	21:42527916-42528534			NA
cg00222801	12794322	12794322	12794322	CCTAAATCCTACCCTTAAAAAACAAAATAAATATAACTCTCCTTCCATAC	1.47e-05	NA		II			CAGAATTTTAGGAAGAAAGGAAAAACCTAAGCACTGGCTCCAAATTTTTGTAGAAGCAGA[CG]CATGGAAGGAGAGCTATATTTATTCTGTTTTCCAAGGGCAGGACTCAGGCCAACAGTGGC	37	2	10829047	CGCATGGAAGGAGAGCTATATTTATTCTGTTTTCCAAGGGCAGGACTCAG	2	10746498	F			NA	NA	NOL10	NM_024894	Body	chr2:10829724-10830241	N_Shore			NA				NA
cg00223046	50774462	50774462	50774462	AAATATTCACAAAACCCTAAACCCCACTAATCTAAATATATCTAAACATC	0.000150072	NA		II			TGTTCCCCACAGTCACTCGTGGAGGTGGTTTTGCAGAGGTGGGGGCCAGGCCTCCCTTCT[CG]ATGCCCAGACATATCTAGACCAGTGGGGTCCAGGGCTCTGTGAACACCCAGACATTGCAA	37	1	6130188	GGTGTTCACAGAGCCCTGGACCCCACTGGTCTAGATATGTCTGGGCATCG	1	6052775	F			NA	NA	KCNAB2	NM_003636;NM_172130	Body;Body	chr1:6131635-6131985	N_Shore			NA				NA
cg00224886	66627457	66627457	66627457	CCTCAAAAATCCRCTCCTCTTAAACACCTTTCTAAATCCTAAACCCTAAC	9.82e-05	NA		II			AGCCCACCTGGCCTCAAAGGTCCGCTCCTCTTGGACACCTTTCTGGATCCTGGGCCCTGG[CG]CTGGGCACTCTGTATCCACACGGATGAAACAGCGGCTGCTGGCGGGGCCGGTTGCCTGAT	37	2	95523721	CGCCAGGGCCCAGGATCCAGAAAGGTGTCCAAGAGGAGCGGACCTTTGAG	2	94887448	R			NA	NA	ANKRD20B	NR_003366	TSS1500	chr2:95522598-95524188	Island			NA	2:94886326-94888267			NA
cg00224929	16794347	16794347	16794347	AAAAACCAAACAACAAACCTCAATTTTTTAAACAACTTCCAAAACCACCC	0.0070478	NA		II			TCTACTCTGGGAAGAACCAGACAGCAGGCCTCAGTTTTTTGAGCAGCTTCCAGAGCCACC[CG]GAGGGGGACTCACTGTGTTGGCTTTCCACAACACATTGGGCTAATGGGCCATTGGACCTT	37	2	171705463	CGGGTGGCTCTGGAAGCTGCTCAAAAAACTGAGGCCTGCTGTCTGGTTCT	2	171413709	R			NA	NA	GAD1	NM_000817	Body					NA				NA
cg00225067	18786444	18786444	18786444	ATCATACCAATAACTTACCATATATAATTATTTCCTAAAAAACACCTTTC	0.00162674	NA		II			CTGAGCTAAAGGCCAATTTGCTTGGAAGAGTGCATCTAATTAAAGTGAGATTAGAAAGGA[CG]AAAGGTGTCCTTTAGGAAATAACCACACATGGCAAGCCACTGGTATGATGATGATCACCA	37	3	45647141	TCATACCAGTGGCTTGCCATGTGTGGTTATTTCCTAAAGGACACCTTTCG	3	45622145	F			NA	NA	LIMD1	NM_014240	Body					NA				NA
cg00225157	37687496	37687496	37687496	CCCAATCATCCTCAAACATATACAACAAAAACTCATCCTAAATAATACCC	0.0258404	NA		II			GTAACCTCCCCCTCCCATAGGCCTGCTTTTCTCGCCCACCATCTGTCGTTGTGTCCTGTG[CG]GGCATCACCCAGGATGAGTTTCTGCTGCACATGTCTGAGGATGACTGGGACAAAGTCATA	37	6	33173038	CGGGCATCACCCAGGATGAGTTTCTGCTGCACATGTCTGAGGATGACTGG	6	33281016	F			NA	NA	HSD17B8	NM_014234	Body	chr6:33172289-33172823	S_Shore			NA		6:33171945-33173651	Promoter_Associated	NA
cg00226340	17747349	17747349	17747349	ACTTATAAAACTTTATCTAAAAAATATAACTATTCAACCACCATACCTAC	0.0202419	NA		II			GTAGTTCCAGGACTTGTGAGGCTTTATCTGAAAAGTGTAGCTGTTCAACCACCATGCCTG[CG]ATGCATACACCCAACCTCAAATATACTGGGAAGTCCAGTGCTCTATTTCTTAAGTAAATT	37	9	34636243	CGCAGGCATGGTGGTTGAACAGCTACACTTTTCAGATAAAGCCTCACAAG	9	34626243	R			NA	NA	SIGMAR1	NM_147157;NM_005866	Body;Body	chr9:34637200-34637950	N_Shore			NA				NA
cg00226923	64771320	64771320	64771320	CCTAATCTATATCCTAAAATACAAAACCTAAACCTCRATACTCTTAATAC	0.00272581	NA		II			GGCATGTGAGGCCCCAGGGGTTCACAGTTACTGGAGCGTGAAGCTGTTCCAGGCACTTCA[CG]TACCAAGAGCACCGAGGCTCAGGCCCTGCACTCCAGGACACAGACCAGGTTCAGTGGAGA	37	6	36972027	CTGGTCTGTGTCCTGGAGTGCAGGGCCTGAGCCTCGGTGCTCTTGGTACG	6	37080005	F			NA	TRUE	FGD2	NM_173558	TSS1500					NA				NA
cg00226984	47759366	47759366	47759366	AAAACAAAACTACCTAACCRACAACCAAAAAACACRAAAACCTACAAAAC	0.0124608	NA		II			CGCCCTGCAGACAGAGGCTAAAAATACCCTCCCCACGTGGCCACCAGACCAGCCCTGCCC[CG]CCCTGCAGGCCTCCGTGTCCCCTGGCTGCCGGCTAGGCAGTCCTGCTCTCTCGGGTCTGT	37	2	239047305	GAGCAGGACTGCCTAGCCGGCAGCCAGGGGACACGGAGGCCTGCAGGGCG	2	238712044	F			NA	NA	KLHL30	NM_198582	TSS200	chr2:239048071-239048454	N_Shore			NA				TRUE
cg00227222	16621460	16621460	16621460	RCCACTTTAAATACACAAATAATTAAATCAACCAACTAATTCTACCTATC	0.0176498	NA		II			TTGCAACGTATTAGAAAAATACTCTTTTCCAGCTAATTAGAAGCCTCCTCCGTGGCAAGG[CG]ACAGGCAGAACCAGTTGGCTGACCTAACCACCTGTGCACCCAAAGTGGCGAGTCTGGGTT	37	2	65539313	CCACTTTGGGTGCACAGGTGGTTAGGTCAGCCAACTGGTTCTGCCTGTCG	2	65392817	F			NA	NA	SPRED2	NM_001128210;NM_181784	3'UTR;3'UTR	chr2:65540761-65541311	N_Shore			NA				NA
cg00227665	43672488	43672488	43672488	CACTCCCTAAACTCRAAAAAACTTCCTCRATATAAATAACAACTATTAAC	0.00333367	NA		II			GCCATCCTTCTCCCGTCTGTGCCCCATGGGACAGAGGCCTCCAGCTGCACCACCACTGCT[CG]TTAACAGCTGCCATCCACACCGAGGAAGCCTCTTCGAGCCCAGGGAGTGGAGGATGGGGC	37	16	87735443	ACTCCCTGGGCTCGAAGAGGCTTCCTCGGTGTGGATGGCAGCTGTTAACG	16	86292944	F			NA	NA	LOC100129637	NR_024488	Body	chr16:87736652-87736907	N_Shore			NA	16:86292569-86292981			NA
cg00228476	44612321	44612321	44612321	AAAAACTTTACTATAACCTATAACTTCATCAAAACAAATAACTTTATATC	0.0103408	NA		II			AGGAGACTAAAGGAAGCTTTGCTGTAACCTATAACTTCATCAGGACAAATGGCTTTGTAT[CG]CAGTAGCAGCTGTGTCCTAGGTAGCCTAGAAGGCTATGGTTATAGCACTGTGGCATATGC	37	11	92617656	GAAGCTTTGCTGTAACCTATAACTTCATCAGGACAAATGGCTTTGTATCG	11	92257304	R			NA	NA	FAT3	NM_001008781	Body	chr11:92615835-92616668	S_Shore		RDMR	NA		11:92617599-92617829	Unclassified_Cell_type_specific	NA
cg00228689	32654495	32654495	32654495	TCCAAAAACCTCCACTAATATCTATATCCCTACTATAAACCCTCCCAATC	0.00187756	NA		II			GAGCTCCTGAGCCTGCCAGGTTTCTGGGTGGAGGGGTTCGGGGGATGGGGGTGGGAAGTA[CG]ACTGGGAGGGCTCACAGCAGGGACACAGATACCAGTGGAGGCTTCTGGAGTTAGACCTGA	37	1	53742112	CGACTGGGAGGGCTCACAGCAGGGACACAGATACCAGTGGAGGCTTCTGG	1	53514700	F			NA	NA	LRP8	NM_033300;NM_001018054;NM_017522;NM_004631	Body;Body;Body;Body	chr1:53742297-53742845	N_Shore			NA				NA
cg00228984	34689339	34689339	34689339	TTCTTCAAACATAACAAAACACTTAATACCCCTCTAAAAACTAACCAACC	0.0163099	NA		II			TGGGGTCAAGCTTCTTCAGGCATGGCAGAGCACTTAGTGCCCCTCTAGGGACTGACCAGC[CG]GGGGTGGACCCTGTTCTATCCTAGACCCCACTTACCTGAGGGGACAAGGACCAGTGCCAG	37	20	1471884	TCTTCAGGCATGGCAGAGCACTTAGTGCCCCTCTAGGGACTGACCAGCCG	20	1419884	R			NA	NA	SIRPB2	NM_001134836;NM_001122962	Body;Body					NA				NA
cg00229257	74778342	11645388	74778342	TCACAATTCCCAACAACTAAATAAAAAACAAACCAAATTACAAACAAACA	0.0211945	11645388	TCGCAATTCCCGACGACTAAATAAAAAACGAACCGAATTACAAACGAACG	I	C	Grn	CCCCGCCGGGGACCAGCGAGCCGGGAGGAGGAGCAGGCGCCACAGCCGCCCCGCGCCCCG[CG]CCCGCTTGTAATCCGGTCCGCTCCTTATTCAGCCGCCGGGAACTGCGAGGAGGCGTCATG	37	6	25279741	TCGCAGTTCCCGGCGGCTGAATAAGGAGCGGACCGGATTACAAGCGGGCG	6	25387720	F			NA	NA	LRRC16A	NM_017640;NM_017640	5'UTR;1stExon	chr6:25279131-25279890	Island	high-CpG:25387273-25387758		NA	6:25387056-25388648			NA
cg00229387	63614403	63614403	63614403	CTATCACTAAAAACCACCTTACCCRCTCTAAAATTAAACTAAAACAAATC	0.024688	NA		II			TTCAGGTGCCCCAGGGACTGGAAGAAATTACAGTGCCTACTTGGAAAGAAGAAGAGATAG[CG]ACTTGCCCCAGTCCAACCCCAGAGCGGGTAAGGTGGCTTCCAGTGACAGGTTTCTGGCTG	37	6	43445942	TGTCACTGGAAGCCACCTTACCCGCTCTGGGGTTGGACTGGGGCAAGTCG	6	43553920	F			NA	TRUE	TJAP1	NM_001146019;NM_080604;NM_001146020;NM_001146016;NR_027394;NM_001146018	5'UTR;5'UTR;5'UTR;5'UTR;Body;5'UTR					TRUE				NA
cg00230120	14662484	19720437	14662484	ACCCAAACCTAACTACTACAAAAAACATAATAATAACCAAAACACCATCA	0.00688152	19720437	ACCCGAACCTAACTACTACGAAAAACGTAATAATAACCGAAACACCGTCG	I	C	Grn	CTCTGCATTTGTGCAGTGCTCCCGTGCCGGGAACACAACCCAGGAACAAGGACTTCCGTG[CG]ACGGTGCCCCGGCCACCACCACGCCTCCCGCAGCAGCCAGGCCCGGGCCTTGAGGTCAGC	37	12	1609346	GCCCGGGCCTGGCTGCTGCGGGAGGCGTGGTGGTGGCCGGGGCACCGTCG	12	1479607	F			NA	NA	LOC100292680	NR_028415	TSS1500					TRUE	12:1479506-1480164			TRUE
cg00230450	67715398	67715398	67715398	CCAAACTCCCAAAAATATTACTACTATTTAACACAAAAATAATAACTAAC	0.00916629	NA		II			AGAGTACCAATGTAGAGGAGTTGCATCAGTCAGCTAAAGAAGTATTCAAAAGTGCCCATA[CG]CCAGTCATCATCTCTGTGCTAAACAGCAGTAACATCCTTGGGAGTCTGGAATCTTCTCTT	37	12	14976228	CGCCAGTCATCATCTCTGTGCTAAACAGCAGTAACATCCTTGGGAGTCTG	12	14867495	F			NA	NA	C12orf60	NM_175874	Body					NA				NA
cg00230837	40700407	40700407	40700407	ATTACATATATCATACTAAACACAAAATTCTATTTCTAAATTAACTCTTC	2.13e-06	NA		II			AAAAGCCTTTCATGTTCCAAAGGAAAGTGCTGAACACATTTCCCAGCACTTCTGAAAGAT[CG]AAGAGCCAATCTAGAAACAGAACTCTGTGTCTAGCATGATACATGCAATATGTGTGCAAC	37	5	9714909	CGAAGAGCCAATCTAGAAACAGAACTCTGTGTCTAGCATGATACATGCAA	5	9767909	F			NA	NA	LOC285692	NR_027112	Body					TRUE				NA
cg00231483	12763373	12763373	12763373	TCTTCCCRATATCCTTCAATACTTTTACTCCTAACAAAACCAAACAACAC	9.61e-05	NA		II			ATAATGACCAGTCTTCCCGGTATCCTTCAGTACTTTTACTCCTGGCAAAACCAAGCAGCA[CG]CCGCCTGATTTTCCGGATCTTCACTGATCTAACAAACAACTCTGCCAAGATGATAAATGC	37	18	70211959	CTTCCCGGTATCCTTCAGTACTTTTACTCCTGGCAAAACCAAGCAGCACG	18	68362939	R			NA	NA	CBLN2	NM_182511	TSS1500	chr18:70208974-70211790	S_Shore		RDMR	NA				NA
cg00231875	30758309	30758309	30758309	CTCAACTTAATCCCATAATATTCCTTTCCCTTAAATTTATTTTCTATCTC	0.000406711	NA		II			ATCTCTGTACTTTAAAGTTATTTTAGTCATGAAATTTTATATGCAGAGAGAAAAAGTTAC[CG]AGACAGAAAACAAATCTAAGGGAAAGGAATATTATGGGATTAAGCTGAGCAAGCAATTCT	37	11	14288293	TCAGCTTAATCCCATAATATTCCTTTCCCTTAGATTTGTTTTCTGTCTCG	11	14244869	F			NA	NA	SPON1	NM_006108	3'UTR					NA				NA
cg00231918	24808369	24808369	24808369	CAAAAAACCAAAAATCTAATCCTTAACACCTCCCACCTACTTACCCAAAC	0.000493714	NA		II			CAGCAAGGGCCTCTGCCGGCCTTTGGCCACCCCAGGGGACTCTCCTGGGTGAGGTGCCTG[CG]TTTGGGCAAGCAGGTGGGAGGTGCCAAGGACCAGACCCCTGGCTCCTTGGAGAATCCGGG	37	4	2819393	AAGGAGCCAGGGGTCTGGTCCTTGGCACCTCCCACCTGCTTGCCCAAACG	4	2789191	F			NA	NA	SH3BP2	NM_003023;NM_001145855;NM_001145856;NM_001122681	TSS1500;Body;TSS1500;5'UTR	chr4:2819499-2820429	N_Shore			NA				TRUE
cg00231927	11614363	11614363	11614363	CRATTTACCCCCAACTAAAAACTAAATAAAAAAAACTCCTTCAAACTCAC	3.12e-05	NA		II			CATCAGTGAGCAGACAAGGCTCTGGCAGGGATGTTTTGGGGGAGCAGTGGTTCCTTACAA[CG]TGAGCCTGAAGGAGTTTCCCTCACTTAGCCCTCAGCTGGGGGCAAACCGTGGATGCTGGA	37	7	157502620	CGTGAGCCTGAAGGAGTTTCCCTCACTTAGCCCTCAGCTGGGGGCAAACC	7	157195381	F			NA	NA	PTPRN2	NM_002847;NM_130842;NM_130843	Body;Body;Body	chr7:157503469-157504144	N_Shore			NA				NA
cg00232092	12624465	12624465	12624465	CCTTCCCCCAATCCTATCTATAAATATAAATTATACTACTAATTAAAACC	1.63e-05	NA		II			TCAGGAACAGCCCTTCCCCCAGTCCTGTCTATGAGTATAAATTATGCTGCTGGTTAAAAC[CG]CTTGCTCATGAGAACAGGACACCCAGGCGCGATCGTACACACGCTAGGATGCATTCCTGG	37	7	5518887	CTTCCCCCAGTCCTGTCTATGAGTATAAATTATGCTGCTGGTTAAAACCG	7	5485413	R			NA	NA	FBXL18	NM_024963	3'UTR	chr7:5521368-5521615	N_Shelf			NA	7:5485413-5485482			TRUE
cg00232445	16628508	16628508	16628508	TCCCACCTAAAACCACTCACTACCACTCATAAATTAAAATATATAAAAAC	0.00424564	NA		II			ACAGACTGACAGTATTAGCGTGCTGCAGTTTCATGATGGCAAGAAGGAGGTTACCAAAGC[CG]TTTTCATACACCTTAACTCATGAGTGGTAGTGAGTGGCCCCAGGTGGGAAGCACAGGTGA	37	16	78310016	CCCACCTGGGGCCACTCACTACCACTCATGAGTTAAGGTGTATGAAAACG	16	76867517	F			NA	NA	WWOX	NM_016373;NM_130791	Body;Body					TRUE				NA
cg00232453	44749332	44749332	44749332	AAACTTTTTCTCTTCCTCTACAATTCATAACTCTTTAAAAAACACCCCTC	1.77e-06	NA		II			GATGAGGGGCCAGCAGGCTCCAGGGAGTCGGGGGTGGCCTTGGGCAGGGTTTCTTCACTA[CG]AGGGGTGTCCCCCAAAGAGCCATGAACTGTAGAGGAAGAGAAAAAGTTCAGAGCTAAGGG	37	6	31864574	CGAGGGGTGTCCCCCAAAGAGCCATGAACTGTAGAGGAAGAGAAAAAGTT	6	31972553	F			NA	NA	EHMT2	NM_006709;NM_025256	Body;Body	chr6:31864897-31865419	N_Shore			NA				NA
cg00232483	26789306	26789306	26789306	AAACCCAATAATAAACAAAACATTCACCATCTATTATTCTTACCTTCAAC	0.0269763	NA		II			CTTGAAAACCTGTTGATGCCGTTTTGGTGGCTGTTGCCGGGTTTGGGAGTTTGGTCTCAA[CG]TTGAAGGCAAGAACAATAGATGGTGAATGTTCTGCCCACTACTGGGCTTTTGTTGGGGAA	37	16	19849514	AGCCCAGTAGTGGGCAGAACATTCACCATCTATTGTTCTTGCCTTCAACG	16	19757015	F			NA	NA	IQCK	NM_153208	Body					TRUE				NA
cg00232500	36771379	36771379	36771379	CATACATACACACATAATAACCCACCCCACACATATACATACATTCTCAC	0.00143251	NA		II			AAATGCCTTCACATGCATGCACACATAGTGACCCACCCCACACATGTGCATGCATTCTCA[CG]CATGCTCCACACACACACGGGGGCACACACATACGCACAGGCCGCACATGCCCACACCCA	37	9	14910689	ATGCATGCACACATAGTGACCCACCCCACACATGTGCATGCATTCTCACG	9	14900689	R			NA	NA	FREM1	NM_144966	TSS1500					NA				NA
cg00232952	50717363	50717363	50717363	TTACCTTTTCCCCAATTTTAATACTACAAATACATTTTACATCTACACAC	5.02e-06	NA		II			TCTCTTTAAAAACAAGTGATTTGAAAAATGACTATCTTTCATGTCTAAGTATAGGGTGGG[CG]TGTGCAGATGTAAAATGTACCTGCAGTACTAAAACTGGGGAAAAGGCAAACACAGGATGA	37	18	30047736	TGCCTTTTCCCCAGTTTTAGTACTGCAGGTACATTTTACATCTGCACACG	18	28301734	F			NA	NA	FAM59A	NM_022751	Body	chr18:30050115-30051345	N_Shelf			NA				NA
cg00232996	63803447	63803447	63803447	TAAATCATAAAATATATAAAATATAAAAAACCTTCTCCACTACCTTTACC	0.00694398	NA		II			AAAAAAATCTTCACTGCTAGATAACCAAAGGGGATGTGGAAAATGAAGATATTAAGGAAA[CG]GCAAAGGTAGTGGAGAAGGCCCCCCACACCTCACACACCTCATGACTCATAGCACACAAA	37	6	32094729	CGGCAAAGGTAGTGGAGAAGGCCCCCCACACCTCACACACCTCATGACTC	6	32202707	F			NA	NA	ATF6B	NM_004381;NM_001136153	Body;Body	chr6:32097820-32098086	N_Shelf			NA				NA
cg00233943	63656333	63656333	63656333	AAAACCTCRATATCTATCCCTTTCCAAAACRCTAAAAATACTCCTATAAC	0.0317949	NA		II			GTGCACGGTGATGGAGTCACCTAAAGGGGCTGGGAGGTGTTTTCCAGGCCCAGTTCCTCT[CG]CCACAGGAGCATCCCCAGCGTCCTGGAAAGGGACAGACATCGAGGCCTCTCTGAGCGGGA	37	17	59553911	CGCCACAGGAGCATCCCCAGCGTCCTGGAAAGGGACAGACATCGAGGCCT	17	56908693	F			NA	NA	TBX4	NM_018488	Body					TRUE				NA
cg00234046	51637442	51637442	51637442	AACAACCACRTAAAAAATAAAACCAATCTACTCTAAAAATAAATTCTAAC	5.64e-05	NA		II			GCAAACCCAAGGAAAAACTTGTTATGTGGTATGTTGGGTAAGGGACGGAGGATGGGGAGG[CG]CTAGAATTCATTCCCAGAGTAGACTGGCTTTACCTTCCACGTGGCTGTTTCCTGACTGCT	37	10	73169245	ACAGCCACGTGGAAGGTAAAGCCAGTCTACTCTGGGAATGAATTCTAGCG	10	72839251	F			NA	NA	CDH23	NM_052836;NM_022124	5'UTR;5'UTR					TRUE				NA
cg00234294	17619314	15782306	17619314	CCCAACTACAAAAACAAACAACCCAAATAAAAACTCAAATAAAAAAAACA	0.00153754	15782306	CCCGACTACGAAAACAAACGACCCGAATAAAAACTCAAATAAAAAAAACG	I	A	Red	AGGAGGCGCTAGCCCGGCTGCGGGAGCAGGCGGCCCGGGTGGGGACTCAGGTGGAGGAGG[CG]GCTGAGGGCGTCCTCCGGGCCCTGCTGGCCCAGAAGCAGGAGGTGCTGGGGCAGCTACGA	37	7	100731366	CGCCTCCTCCACCTGAGTCCCCACCCGGGCCGCCTGCTCCCGCAGCCGGG	7	100518086	R			NA	NA	TRIM56	NM_030961	Body	chr7:100732088-100732424	N_Shore			NA	7:100517459-100518271	7:100730891-100731446	Unclassified	NA
cg00234616	46645366	46645366	46645366	CRCTTAATAACCTTATAACCTCTAACCATAAATCCAAAAACCRAAAATAC	0.00953349	NA		II			GGTCTAAGGCTCAGGGGCCCGCCCGCGGGGGTCCCATCCCCGGGAAGGACGCAGAGTTCA[CG]CACTCCCGGCTCCTGGATTCATGGCCAGAGGTCACAAGGTCACCAAGCGGCTTAGGTCTT	37	2	74740572	CGCACTCCCGGCTCCTGGATTCATGGCCAGAGGTCACAAGGTCACCAAGC	2	74594080	F			NA	TRUE	TLX2	NM_016170	TSS1500	chr2:74740455-74743795	Island	high-CpG:74594080-74594095		NA	2:74593847-74597471			NA
cg00234624	51722385	51722385	51722385	TCCTACATCCATCCCAAAAACRAACACACCATAAATTTTAAAAAACCATC	0.0037733	NA		II			TCCGTATTCGGTCCTGCATCCATCCCAGAGGCGAACACACCATGGGTTTTAGGAAACCAT[CG]TTCCTCCTACTCCAAGGGACGCCGGCCAGGACCAGAGTCGGGGAAGTGGGGCCCGATTCA	37	9	103114721	CCTGCATCCATCCCAGAGGCGAACACACCATGGGTTTTAGGAAACCATCG	9	102154542	R			NA	NA	TEX10	NM_017746;NM_001161584;NM_001161584	5'UTR;1stExon;5'UTR	chr9:103114595-103115414	Island			NA	9:102154351-102155215			NA
cg00234691	74778398	57703330	74778398	AAACAAAAATAACAAACAAAAACAACCCAAAAAAACAAACCAAAACAACA	0.00398375	57703330	AAACGAAAATAACAAACGAAAACAACCCGAAAAAACGAACCGAAACGACG	I	C	Grn	TCCGCGCGCTGCAGGCGAGAGTGGCAGACGGAGGCAGCCCGGGGAAGCGAGCCGGAGCGG[CG]CCCGCACTGAGGCGGCTGCAGTGCTGACACCACTCAGGGCAAGGGTGTCCGACGGCTGGA	37	5	75379273	AGGCGAGAGTGGCAGACGGAGGCAGCCCGGGGAAGCGAGCCGGAGCGGCG	5	75415029	R			NA	NA	SV2C	NM_014979	TSS200	chr5:75378974-75380796	Island			NA	5:75414546-75416617	5:75378768-75379425	Unclassified_Cell_type_specific	TRUE
cg00234998	31765428	31765428	31765428	ACCRATACCCTAAAAAATACCTACTAATATAATAACAAATCAAAAACCAC	0.00908349	NA		II			ACTCTGCGCAGTCCGCCTGACCTCTCCTCTTGCGGACCAAGTGAGAGCAAGTTTCCCGCA[CG]TGGCCTTTGACCTGTCACTACATCAGCAGGCATCCCCCAGGGCACCGGCATCCTCCATCC	37	11	3254324	CCGGTGCCCTGGGGGATGCCTGCTGATGTAGTGACAGGTCAAAGGCCACG	11	3210900	F			NA	NA	MRGPRE	NM_001039165	TSS1500	chr11:3254239-3254476	Island			NA	11:3210788-3211031			NA
cg00235367	58736358	58736358	58736358	TAACCRATCCCTTAACTCAAAACRCTAAAAAACAACCATTTATTTAAAAC	3.47e-07	NA		II			AAGCCTAGATTCCTGCCGGAGCTGCAAGTGCTGCGGAAATGGGGGAAGAAGGTTTCTGGG[CG]CTTTAAACAAATGGCTGCCTCCCAGCGCTCTGAGTTAAGGGACCGGCTACCTAGCGTCTA	37	3	147110322	AGCCGGTCCCTTAACTCAGAGCGCTGGGAGGCAGCCATTTGTTTAAAGCG	3	148593012	F			NA	NA	ZIC4	NM_001168378;NR_033118;NR_033119;NM_032153;NM_001168379	Body;TSS200;TSS200;Body;Body	chr3:147108511-147111703	Island			TRUE	3:148591852-148593286			TRUE
cg00235484	12615439	12615439	12615439	AAAAATACAAATTATTATAACTAATTTCRTCATTTCCTATATATCCTTCC	0.00585468	NA		II			ATTATCTCCCTGGGAAGGGAAATAGGGAAACAGGGAGAGAGATGGAAGGAGGTGAGACTA[CG]GAAGGATACACAGGAAATGACGAAATTAGCCATAATAATTTGTATTCCCATAAATACATC	37	6	136825415	CGGAAGGATACACAGGAAATGACGAAATTAGCCATAATAATTTGTATTCC	6	136867108	F			NA	NA	MAP7	NM_003980	Body					TRUE				NA
cg00235661	27771481	27771481	27771481	AACAACAACACACCTTCATAAAAAATACCTAAATTCAAAACATTTATTTC	0.0134662	NA		II			TGCAATTTGAAGTAAGTAGTAAATATTCACTGGGACAATAAAGGAACAAATAAATGAAAA[CG]AAACAAATGTTTTGAATCTAGGCATTCTTTATGAAGGTGTGTTGTTGTTTTTTAAAGGTA	37	3	20228976	CGAAACAAATGTTTTGAATCTAGGCATTCTTTATGAAGGTGTGTTGTTGT	3	20203980	F			NA	NA	SGOL1	NM_001012412;NM_001012410;NM_001012413;NM_001012409;NM_001012411;NM_138484	TSS1500;TSS1500;TSS1500;TSS1500;TSS1500;TSS1500	chr3:20227289-20227956	S_Shore			NA				NA
cg00235933	59702418	59702418	59702418	TAACCCTAAATCTCTCATCCTACTCRAAACACTACAATATCAAAATAAAC	0.0188442	NA		II			CGGCCCTCGGCTGGCCCTGGGTCTCTCATCCTGCTCGGGGCACTGCAATGTCAGGGTGAG[CG]GGAGGTGCGGGCTTCAGGGGCTTGCGCGCACCGGGCAGGGAGCACTGAGGCCGTGCGGGC	37	5	79865808	GGCCCTGGGTCTCTCATCCTGCTCGGGGCACTGCAATGTCAGGGTGAGCG	5	79901564	R			NA	NA	ANKRD34B	NM_001004441	5'UTR	chr5:79864842-79866447	Island		DMR	TRUE	5:79900634-79902253			NA
cg00236005	62753311	62753311	62753311	TAACAAACAAAATAACTATCACTAACTTAAACAACTTCCACAACAACTCC	0.0313356	NA		II			GTGGAATCTGTTAACAAGCAAAATGACTGTCACTGACTTAGGCAACTTCCACAACAACTC[CG]TTTGAACAAACTATAGAGAGCAAAGCTTAAAGAGAAAACACTAGTATTCACCTGTTGTCA	37	10	64279749	CGGAGTTGTTGTGGAAGTTGCCTAAGTCAGTGACAGTCATTTTGCTTGTT	10	63949755	R			NA	NA	ZNF365	NM_199451;NM_199452	Body;TSS1500					NA				NA
cg00236766	52640491	52640491	52640491	CCAATACRCAAACCCAATAACTAACCTACTAAACAAATAAAAAACCTTCC	5.23e-06	NA		II			ACCTCCTGCTCCCAGTACGCAGACCCAGTAGCTGACCTGCTGGACAAATGGGGGGCCTTC[CG]GGCCCGGCTGTTTCGAGAGTCCTGCGTCTTCCACCGGGGGAACTACGTGAAGGACCTGAG	37	2	219268000	CAGTACGCAGACCCAGTAGCTGACCTGCTGGACAAATGGGGGGCCTTCCG	2	218976244	R			NA	NA	CTDSP1	NM_182642;NM_021198	Body;Body	chr2:219271008-219271469	N_Shelf			NA	2:218976244-218976281			NA
cg00236832	47711472	47711472	47711472	CCTACTCAAATATATACTAACAAAAAACCRATAAAATTCCCAAAAAAACC	0.00689127	NA		II			CTTGCAGCAGCCTAACCCAGAAGCAGGGGGGAATCCTGAATCGAGCTGAGAGGGCTTCCC[CG]GTTCTCCTGGGAACCCCATCGGCCCCCTGCCAGCACACACCTGAGCAGGTAGGACCATGC	37	17	38465489	CTGCTCAGGTGTGTGCTGGCAGGGGGCCGATGGGGTTCCCAGGAGAACCG	17	35719015	F			NA	TRUE	RARA	NM_000964;NM_000964	5'UTR;1stExon					NA				NA
cg00237268	18803333	18803333	18803333	AACTAAATAAATTCAAATACTCCTACTAAAAAAACCRTTCTCTAATATTC	3.19e-09	NA		II			TGTTAGAGCAGAACTGAGTGAGTTCAGATGCTCCTGCTGAGGGGGCCGTTCTCTGATGTT[CG]GTGCAGCCCTGATTTAGGAGCCTGGCGTGAGGCCGACAGCCTGGGGCTGCAGTGTAGCGT	37	4	7287615	ACTGAGTGAGTTCAGATGCTCCTGCTGAGGGGGCCGTTCTCTGATGTTCG	4	7338516	R			NA	NA	SORCS2	NM_020777	Body					NA	4:7338393-7338649			NA
cg00237904	50764357	50764357	50764357	TCTTAAATACTATCCCCAATAAACCCATCTCCCAACRATAACACAAAATC	0.0183366	NA		II			AGACTGTGATGTGAGTCACCACTGCCGCCTCTCGGCCATTTCCGTCTCCACAGCCACAAC[CG]ATTCTGTGCCATCGCTGGGAGATGGGCTCACTGGGGACAGCACCCAAGACCCAAGGGGAG	37	11	2020314	CTTGGGTGCTGTCCCCAGTGAGCCCATCTCCCAGCGATGGCACAGAATCG	11	1976890	F			NA	NA	H19	NR_002196	TSS1500	chr11:2019565-2019863	S_Shore		RDMR	TRUE	11:1976142-1977246			NA
cg00238182	61803370	61803370	61803370	AACCTCTTTCTTCTACCACTCAATTTCTTACCCTTTAAAAACAAATTTAC	0.0133751	NA		II			CTAAATGTGTCAGCCTCTTTCTTCTGCCACTCAGTTTCTTGCCCTTTGGAGGCAGGTTTG[CG]TAAACCTGCTCACCACAGAGCAATGACCCCCTAACACCCTCAATGAACAACGCTTTCCTG	37	22	43621788	CGCAAACCTGCCTCCAAAGGGCAAGAAACTGAGTGGCAGAAGAAAGAGGC	22	41951732	R			NA	NA	SCUBE1	NM_173050	Body	chr22:43623368-43623667	N_Shore			NA				NA
cg00238570	50636423	50636423	50636423	CRTACACTTTACTCTTCCAAAAATTTCACTAACAAAAACAAAACAAATAC	0.00573189	NA		II			CCCAACACCAGCGTGCACTTTGCTCTTCCAGGAGTTTCACTGGCAGGAGCAGGGCAGGTG[CG]GCCAACATGACCTCTCATGTTTCTCACCCTGGGTGCTGTCCTGGTTCCAGAAACTCCGTG	37	2	110871644	GTGCACTTTGCTCTTCCAGGAGTTTCACTGGCAGGAGCAGGGCAGGTGCG	2	110228933	R			NA	NA	MALL	NM_005434	Body	chr2:110872945-110873587	N_Shore			NA				NA
cg00238815	51693347	51693347	51693347	CAAAAACAAAAAATAAATCTTCTAACCTAACAACCCAAACCAAAATACCC	0.000719302	NA		II			TCAAGCAGATGAGCAGGGCTCTCTGTTCCGCGGGGCTTCTGGATGACCGGGGCAGCGATG[CG]GGCACCCTGGCCTGGGTTGCCAGGCCAGAAGACTCACTTCTTGCTTTTGAACGTGCCCAG	37	8	144808056	CGGGCACCCTGGCCTGGGTTGCCAGGCCAGAAGACTCACTTCTTGCTTTT	8	144880044	F			NA	NA	FAM83H	NM_198488	3'UTR	chr8:144808221-144810978	N_Shore			NA	8:144879781-144883419			NA
cg00238818	42777304	42777304	42777304	TAAACCATCAAAAATACTCTAAAAAAACTAACACTAACTAAAAATCCCCC	1.19e-13	NA		II			CCATCACCTCCAGCCCCAGAGTTACCTTTTCTGACCCAGAGCTGTTCCTGCCTGGCAGAC[CG]GGGGACCTCTAGTTAGTGCCAGTTTCCTCAGAGCATTCCTGATGGCTCAGGAAAAGAATA	37	5	176880261	CGGGGGACCTCTAGTTAGTGCCAGTTTCCTCAGAGCATTCCTGATGGCTC	5	176812867	F			NA	NA	PRR7	NM_030567	5'UTR	chr5:176881221-176883117	N_Shore			NA				NA
cg00238848	29743406	46676379	29743406	TACCCACACTTACAATAAATACCCTCAAAAATCAAACCTAAAAAAAAACA	3.73e-05	46676379	TACCCACACTTACGATAAATACCCTCGAAAATCAAACCTAAAAAAAAACG	I	A	Red	GTCTTCGATGTCTGCCCACACTTGCGGTAGATGCCCTCGGAGGTCAGGCCTAGGGAGGGG[CG]GGGCCAAGCGTTCGGGGCCTGAGGCATAGAGTCATGGGGCGGGGCCGCGCAGCTCTGGGG	37	11	72408252	TGCCCACACTTGCGGTAGATGCCCTCGGAGGTCAGGCCTAGGGAGGGGCG	11	72085900	R			NA	NA	ARAP1	NM_001135190;NM_015242;NM_001040118	Body;Body;Body	chr11:72408050-72408513	Island			TRUE	11:72085733-72086066			TRUE
cg00238897	66799380	47725346	66799380	ATTCCTAATCCAAAAAAATACAACTCAACTCATAAAATCCAAAAATCACA	0.00555535	47725346	ATTCCTAATCCGAAAAAATACAACTCAACTCGTAAAATCCGAAAATCACG	I	A	Red	TTGGTTCAACAAGTTCCTAGTCCGGGAGGATGCAGCTCAGCTCGTGGAGTCCGAGAGTCA[CG]GCGTAAAATTGGCGCTTCCCGCACATGCAGATCTCGGGCTCCCGGGGTGTCCCGGCCGCC	37	2	10444450	GTTCCTAGTCCGGGAGGATGCAGCTCAGCTCGTGGAGTCCGAGAGTCACG	2	10361901	R			NA	NA	HPCAL1	NM_002149;NM_134421	5'UTR;5'UTR	chr2:10442308-10444509	Island			NA	2:10361582-10362112	2:10443656-10445129	Promoter_Associated	NA
cg00238958	29648447	29648447	29648447	ATAAAACCTTACACTTATTCTCCATACCCACRTATAATCCRATTCTTCTC	0.000169067	NA		II			ACTTCCACTTAATAAAACCTTGCACTTATTCTCCATGCCCACGTGTGATCCGATTCTTCT[CG]TAAACCAAGGCAAGATCCCTGGGATACAGAAAGTCCTCTGTCTTTGTGATAAGGCAGGGG	37	6	28480984	CGAGAAGAATCGGATCACACGTGGGCATGGAGAATAAGTGCAAGGTTTTA	6	28588963	R			NA	NA	GPX6	NM_182701	Body					NA				NA
cg00239117	36664508	36664508	36664508	TAAAACAACTTCTAAAAACCAACATATATCACTAATATCCCCAACAAAAC	0.00757307	NA		II			TCAGGCAAGTGTGGGGCAACTTCTAGGGGCCAGCATATGTCACTGGTGTCCCCAGCAGGG[CG]TCTCCAGGGGATCATTAGGGTGTAGTACTTGGCTGAACACAAAAGTAGTTGCATTTGCCA	37	2	238928702	CGCCCTGCTGGGGACACCAGTGACATATGCTGGCCCCTAGAAGTTGCCCC	2	238593441	R			NA	NA	UBE2F	NM_080678	Body					TRUE				NA
cg00239490	44732392	44732392	44732392	CAATACAATATAAACTATCACACCAAATAAATTAAAATCTTAAACATAAC	0.0259644	NA		II			GCCTTAGTGATCAGTGCAATGTGAGCTGTCACACCAAGTAAGTTAAAGTCTTGAACATGG[CG]TTCCCTTTTGGCAATAGGAGCTATTATCTAGAATAAATAAGGCGATTTGTTCTCTTATTG	37	5	170221919	CGCCATGTTCAAGACTTTAACTTACTTGGTGTGACAGCTCACATTGCACT	5	170154497	R			NA	NA	GABRP	NM_014211	Body					NA				NA
cg00239660	63607435	63607435	63607435	AATAATTACTCATACAACCAAAAAAAATTCCAAATCCCTACCTATTTACC	0.0178461	NA		II			TCTCATACCATTTGTAGTTTGGTCAGATTTGAAAGATGAGTTGATTGTTTTTAGATAGTG[CG]GCAAATAGGCAGGGACTTGGAATCCTCTCTGGCTGTATGAGTAATTACTGTCTCATACTT	37	6	130182620	CGGCAAATAGGCAGGGACTTGGAATCCTCTCTGGCTGTATGAGTAATTAC	6	130224313	F			NA	NA	C6orf191	NM_001010876	TSS1500					NA				NA
cg00239835	33678377	33678377	33678377	AACCAATCAAAACAACTTAATAAAATAACCACACTTCTCTAAAAAACCTC	0.00377763	NA		II			GATTGGTCTCAGACCAGTCAGAACAACTTAATGAGGTGGCCACACTTCTCTGAGAAACCT[CG]GTCCCTCCCACAGAGCTTTGTGCTTCTCACCGTAGCCACAACCACAGCTCTGTTTCAGGC	37	11	72379867	ACCAGTCAGAACAACTTAATGAGGTGGCCACACTTCTCTGAGAAACCTCG	11	72057515	R			NA	NA	PDE2A	NM_001146209;NM_002599	5'UTR;Body					NA		11:72379670-72380023	Unclassified_Cell_type_specific	NA
cg00239915	33732440	33732440	33732440	ATTTTCAAAAACATAACTACAAAATAAAACTAATCATACACATAATAACC	0.00290878	NA		II			CTGTTAATTGCATTTTCAGAGACATAGCTACAAGGTGAAACTAATCATACACATGATAAC[CG]GGCTTCACCACCTACAGTGCCCTGCTGCTGCACTCTCACTAATCTGTATTAAAACAGCCC	37	7	157809596	TTTTCAGAGACATAGCTACAAGGTGAAACTAATCATACACATGATAACCG	7	157502357	R			NA	NA	PTPRN2	NM_002847;NM_130842;NM_130843	Body;Body;Body				RDMR	TRUE				NA
cg00240734	14791400	29790364	14791400	AAAAAAAACACTCAAACTACAAAAAACCAAACAAAAACAAATATTCCACA	0.00966453	29790364	AAAAAAAACGCTCGAACTACAAAAAACCGAACGAAAACGAATATTCCGCG	I	A	Red	ACCAGGAGGCGGGGGAGGGGCGCTCGGACTACAGAGGACCGGACGGGGGCGAGTGTTCCG[CG]GGGTGTGTGGAGTAAGAGCTGGGACGGACCTTTGTAGCTTTGCGAAATTAACCGTTTTTC	37	6	118241486	GGGAGGGGCGCTCGGACTACAGAGGACCGGACGGGGGCGAGTGTTCCGCG	6	118348179	R			NA	NA	SLC35F1	NM_001029858	Body	chr6:118241347-118241569	Island			TRUE	6:118347796-118348224			NA
cg00240875	23601507	23601507	23601507	CACAAAACAAATAAATTACATCATCAAACCAAAATCTTCRAATCACTAAC	0.0251957	NA		II			GTTGTCATGATCACAAGACAAGTAAATTGCATCATCAAGCCAGGATCTTCGGATCACTGG[CG]TAGCTCTCTTTCCAGTGCATCACAGATGTCCCTCATCCCTGGCTTCCACTATTCCCATCA	37	6	32817673	CGCCAGTGATCCGAAGATCCTGGCTTGATGATGCAATTTACTTGTCTTGT	6	32925651	R			NA	NA	TAP1	NM_000593	Body	chr6:32820849-32822370	N_Shelf			NA				NA
cg00241002	54771452	57737407	54771452	ATAAAACAAACTACTATAAAAATAAAACCACTATAAAAACAAAACTACCA	4.02e-06	57737407	ATAAAACGAACTACTATAAAAATAAAACCGCTATAAAAACGAAACTACCG	I	T	Red	AATAAATGGAAGGTGGGGCGGGCTGCTGTGGGGATGGGGCCGCTGTGGGGGCGGGGCTGC[CG]TGGGGGCGGGGTCGCTGTGGGGGCGGGGCCTTGTGAGCCAGTGCTTGGACTTCCACGTCA	37	10	26931912	CGGCAGCCCCGCCCCCACAGCGGCCCCATCCCCACAGCAGCCCGCCCCAC	10	26971918	R			NA	NA	LOC731789	NR_026794	TSS200					NA	10:26971909-26972111			NA
cg00241274	60752413	60752413	60752413	ACATACCCTAACACAATACTAAACATATACATTACAATCTCATTAAATAC	0.000297642	NA		II			TAATCTCTCCCACATACCCTAGCACAGTGCTGGGCATGTACATTACAGTCTCATTAAGTA[CG]CTGGAAAATAAATGGAATCAAATTTCCTAAAATTCAAAGTCTCCAGGAAGTTGCTCAGGG	37	18	44199541	CATACCCTAGCACAGTGCTGGGCATGTACATTACAGTCTCATTAAGTACG	18	42453539	R			TRUE	NA	LOXHD1	NM_144612	Body					NA				NA
cg00241281	65725434	65725434	65725434	CAAACAAACCCTCATAACTCTCAATATACCACCTTAAAAAAACCAAAAAC	1.46e-10	NA		II			CTGGCCAAGGTCAGACAGACCCTCATGGCTCTCAGTGTACCACCTTAGAGGAGCCAGGGG[CG]CGTGGGAAACACAGAGTCCCTTGTTCTCTCCGAAGTGGGACCCTGACTTTAAGCAGTCGC	37	14	105779794	CGCCCCTGGCTCCTCTAAGGTGGTACACTGAGAGCCATGAGGGTCTGTCT	14	104850839	R			NA	NA	PACS2	NM_015197;NM_001100913	TSS1500;TSS1500	chr14:105780339-105782027	N_Shore			NA	14:104850839-104851060			NA
cg00242020	67688488	65631301	67688488	TACTCCTATATTCCACTTCTACCCAAAAATCTTCCTCCAAAACTAAACCA	0.000427014	65631301	TACTCCTATATTCCGCTTCTACCCAAAAATCTTCCTCCAAAACTAAACCG	I	A	Red	ACTATGTGTCTCTGCTCCTGTGTTCCGCTTCTGCCCAGAAGTCTTCCTCCAAGGCTGGGC[CG]GGCAGTCCTGCCTCTTCCTGGAACCTTGGCAGCCCCAGTGCAGAGGCGCTGGACAACGGG	37	8	37797632	CGGCCCAGCCTTGGAGGAAGACTTCTGGGCAGAAGCGGAACACAGGAGCA	8	37916789	R			NA	NA	GOT1L1	NM_152413;NM_152413	5'UTR;1stExon					NA				NA
cg00242039	59689492	59689492	59689492	CRCAATTACTTTTACACCAACCTAATAAAACCCTAAAAAACATTATAATC	0.000857074	NA		II			TACACTCCACAGAAGTGGAATGTAGGTGTGGGAGCAGGCGACCAAGCGGCTCAAGAACCC[CG]ATTACAATGTTTTTTAGGGTTTTATTAGGTTGGTGCAAAAGTAATTGCGGTTTTTGCCAT	37	19	58447434	GCAATTACTTTTGCACCAACCTAATAAAACCCTAAAAAACATTGTAATCG	19	63139246	F			NA	NA	ZNF418	NM_133460	TSS1500	chr19:58446336-58446800	S_Shore			NA				NA
cg00242341	18681304	18681304	18681304	CAAAAAACTCAATAATTAACTAAATTTAATCATAAAATCCTATAATCCCC	0.015667	NA		II			CTCACTGCAGCCTCAACCTCCTGGGCTCAAGTGATCCTCCCACCTCCCCCTCCCCAGTAG[CG]GGGACCACAGGATCTCATGACCAAACCCAGCTAATTACTGAGCTTTTTGGTACCCCCTCA	37	11	72447419	CGGGGACCACAGGATCTCATGACCAAACCCAGCTAATTACTGAGCTTTTT	11	72125067	F			NA	NA	ARAP1	NM_001040118	5'UTR					TRUE				TRUE
cg00242951	45760384	45760384	45760384	AAACACAAAACACTATACCCAACTCCAAATACACATTTTAAAATTAACCC	9.73e-05	NA		II			TGGGGTGGGGTGGCAAAAAGCAATCCATGTTAGCAGGTCTCAAATACTGGACCCCATACA[CG]GGTCAATCTCAAAATGTGTATCTGGAGCTGGGCACAGTGTCTTGTGCCTGTCATCCCAGC	37	3	9596482	CGGGTCAATCTCAAAATGTGTATCTGGAGCTGGGCACAGTGTCTTGTGCC	3	9571482	F			NA	NA	LHFPL4	NM_198560	TSS1500	chr3:9595185-9595533	S_Shore			NA				NA
cg00243272	17620471	17620471	17620471	ACCTACAAATAATAAATACAAACTACRTATTCCACAATAACACCAAAATC	0.0134426	NA		II			CGATCAGCACCGTGAGGTTGTAGGCCTCTGGCTCCTCAGGCACAGCCGGGGACAGGAAGA[CG]ACCTTGGTGTCATTGTGGAACACGTAGTCTGTACCCACCACCTGCAGGCAAGTCCCAGCT	37	22	50720468	CGACCTTGGTGTCATTGTGGAACACGTAGTCTGTACCCACCACCTGCAGG	22	49062595	F			NA	NA	PLXNB2	NM_012401	Body	chr22:50718979-50721884	Island			NA	22:49060999-49064752			NA
cg00243480	56779504	56779504	56779504	CTCCRTCTTAATCTTAAACACCRAAACACTATTAAAAAAAAACAACAACC	0.0093714	NA		II			CGGCGCCTGTCCAGCGCGTCGAGCCCAGGCGGCCTGGACGCGGGCCTGGTGGAGCCCCCG[CG]GCTGCTGTCCTCCCCCAACAGTGCCTCGGTGCTCAAGATCAAGACGGAGATCTCAGAACC	37	14	34269416	TCCGTCTTGATCTTGAGCACCGAGGCACTGTTGGGGGAGGACAGCAGCCG	14	33339167	F			NA	NA	NPAS3	NM_001164749;NM_173159;NM_001165893;NM_022123	Body;Body;Body;Body	chr14:34268946-34270438	Island			NA	14:33338656-33340189			NA
cg00243661	37748457	37748457	37748457	TCCTTCTAAAACTCTCTAATAAACCACACACCRAACAACTACTATTTATC	1.97e-07	NA		II			GAACAAGGGAGATTAGAAGCAGATTTCCAAGCACAGTGACCAGGTAGACACCCAATAATA[CG]ATAAATAGCAGCTGCTCGGTGTGTGGCCCATCAGAGAGTCCCAGAAGGAGGAATTCTGTC	37	11	6913644	CCTTCTGGGACTCTCTGATGGGCCACACACCGAGCAGCTGCTATTTATCG	11	6870220	F			NA	NA	OR2D2	NM_003700	1stExon					NA				NA
cg00244854	38726302	38726302	38726302	AAAAAATATCAAAAAACTACCATACATAATTTTCTTCCAAAAAAAACTCC	0.0100306	NA		II			CTACCCACGTTGGAGGGTATCAGGAGGCTGCCATGCATGGTTTTCTTCCAAAGAAGGCTC[CG]CCAACTAGGGTGAGGTGGGAAGTCCCGAGCCCAGGGGTGTGAAATGATGGAGATACTGCA	37	3	66481913	GAGGGTATCAGGAGGCTGCCATGCATGGTTTTCTTCCAAAGAAGGCTCCG	3	66564603	R			NA	NA	LRIG1	NM_015541	Body					TRUE				NA
cg00244882	58700391	58700391	58700391	RCTTTAACTCTCRATACCACCTTTAAATACTAAACCACCRATAAATAATC	0.00448494	NA		II			GGAACTCAGACGCTTTGGCTCTCGGTGCCACCTTTAAATGCTAAACCACCGGTAGGTAGT[CG]CTAAATGGGAAAGTCGTGTTCTCCCGGTTTTCAGGTGGGAAAAGCTGAGGCTCCCAGGAG	37	10	7708290	CTTTGGCTCTCGGTGCCACCTTTAAATGCTAAACCACCGGTAGGTAGTCG	10	7748296	R			NA	NA	ITIH5	NM_030569;NM_001001851	Body;Body					NA	10:7748233-7748323	10:7708159-7708977	Unclassified_Cell_type_specific	NA
cg00245492	39688317	39688317	39688317	ACAAAAAAAATATACCTACTCCRAATAAAAACRACRAAAAAAATATACCC	0.023541	NA		II			AACCTCCTCCTCTGCAGGGTACAGAAATGCTGCCACCCCCTCCCCCTCCTCTTCCCGGAG[CG]GGCATACCTCCTCCGCCGCCTCTACCCGGAGCAGGCATACTCCCTCTGCCCCCTCTACCC	37	1	240370865	CGGGCATACCTCCTCCGCCGCCTCTACCCGGAGCAGGCATACTCCCTCTG	1	238437488	F			NA	NA	FMN2	NM_020066	Body	chr1:240370859-240371526	Island			NA				NA
cg00245538	59757307	59757307	59757307	TCCRCTAAAAAAAATACATTTTCTTTCTCTATACCAACACTACTAAATCC	0.0226222	NA		II			AGAGCAATCACAGGCGCGGTCCCAAAACGCCTGCTTTGCCAACAGTTCCTCCTGGAGCCT[CG]GATCCAGCAGTGTTGGCACAGAGAAAGAAAATGCACTTTTCTCAGCGGAGGGAAGGAATC	37	13	61989770	CGGATCCAGCAGTGTTGGCACAGAGAAAGAAAATGCACTTTTCTCAGCGG	13	60887771	F			NA	NA	PCDH20	NM_022843	TSS200				DMR	NA				NA
cg00245613	61624406	61624406	61624406	ACTCCTAAAACRAATCCRAAAAATAAAAACCAACCCAACCAAATCTCATC	0.00191573	NA		II			GTCCCCAAGACACTCCTAGAACGAATCCGGGAGGTGGAGGCCAGCCCAACCAGGTCTCAT[CG]TTCCATACGGAAGAGTAGCAACTAAGACAGTGAGCGGGGACGCAGGGAGAGAGACGCTTA	37	8	143326069	CTCCTAGAACGAATCCGGGAGGTGGAGGCCAGCCCAACCAGGTCTCATCG	8	143323976	R			NA	NA	TSNARE1	NM_145003	Body					NA	8:143323937-143324233			NA
cg00245746	52703338	52703338	52703338	TTTCTCTACCTCTAATCCACACCTTCCATCTATCTCAATCTCTACATATC	0.00214167	NA		II			AGGGCTTGCAGTTTCTCTGCCTCTGATCCACACCTTCCATCTATCTCAGTCTCTGCATGT[CG]GGCTGCTGCCCTCCCAGGGCCGTCACCTGCTCCCTCTCTTTTCTTATTAACATTTTACTC	37	2	674940	TTCTCTGCCTCTGATCCACACCTTCCATCTATCTCAGTCTCTGCATGTCG	2	664940	R			NA	NA	TMEM18	NM_152834	Body	chr2:676651-677678	N_Shore			TRUE				NA
cg00245850	34738385	34738385	34738385	TTCTAATATTATTATTTTTCAATCCTAACCACAAAATCCAACACCAAACC	6.09e-05	NA		II			AAAAAGAAAAAAGCTCGAGGACTTGTGCTCTGAACTATCAAACCGTTTCCTTAATCAAAA[CG]GTTTGGTGTTGGATCCTGTGGTCAGGATTGAAAAATAACAACATTAGAAGAGAAATAATT	37	8	143925513	CGGTTTGGTGTTGGATCCTGTGGTCAGGATTGAAAAATAACAACATTAGA	8	143922515	F			NA	NA	GML	NM_002066	Body				DMR	NA				NA
cg00245856	44691472	44691472	44691472	CRTAATCCTTTAAAACRAAAATCCTAATAAATAAACTTCTAAAACAACCC	0.0201994	NA		II			ATTAGGTTCCACGTGGTCCTTTGGGGCGGGAATCCTGGTGGGTGAGCTTCTGGGGCAGCC[CG]TGGAGGCCCAGGATGTCCATGTGTCCCGTGATTGGGGCGGTGTTGTGTGCTCAGACGGCC	37	13	113707783	CGGGCTGCCCCAGAAGCTCACCCACCAGGATTCCCGCCCCAAAGGACCAC	13	112755784	R			NA	NA	MCF2L	NM_001112732;NM_024979	Body;Body	chr13:113705500-113705778	S_Shelf			NA	13:112755750-112755962			NA
cg00246486	33784427	33784427	33784427	TCCATACTTTATAAATTATTAAACTCTAATACCAAAAAACAACAACAAAC	0.00511246	NA		II			TTCAATATAAGTCTTCATTCTAGAACTGTAAGAAAATCAGACAGTAATTATAATGTATCT[CG]TTTGTTGTTGTTTCTTGGTACTAGAGTCCAACAACTTATAAAGTATGGAGGTCTGTGTCA	37	3	112642487	CCATACTTTATAAGTTGTTGGACTCTAGTACCAAGAAACAACAACAAACG	3	114125177	F			NA	NA	CD200R1	NM_170780;NM_138806	3'UTR;3'UTR					NA				NA
cg00246768	53687482	53687482	53687482	ATCACAACTAAAAATCACTATAAACCTAATACCAAAATCTCCACCRTAAC	1.06e-05	NA		II			GTGTACCCCGGGTCACAGCTGAAAGTCACTGTGGACCTGATGCCAAAGTCTCCACCGTGG[CG]ATGGCCGTTCACAGGGATGCCCGGGTCCAGGCAGGAATCCGACTCAAGCGTCACACCTGG	37	8	3245147	CGCCACGGTGGAGACTTTGGCATCAGGTCCACAGTGACTTTCAGCTGTGA	8	3232554	R			NA	NA	CSMD1	NM_033225	Body					NA	8:3232312-3232605			NA
cg00246840	15662463	15662463	15662463	ACAAAATACCCTATAAACTCTAACTTATCTAAACCAAACAAAATACTTCC	0.00683677	NA		II			AGTCTTCTTCTTTTGACTTTGGAGGGTAAAAGAAGGCTTTTAGGCAAATGTGAAGCAGTG[CG]GAAGCATCCTGTTTGGCTTAGACAAGCTAGAGTTTACAGGGCACTCTGCATACTCCTGTG	37	13	76267059	CAGAGTGCCCTGTAAACTCTAGCTTGTCTAAGCCAAACAGGATGCTTCCG	13	75165060	F			NA	NA	LMO7	NM_005358	Body					TRUE				NA
cg00246969	19671345	19671345	19671345	TCTACTATCAACACTAAAACAAATACTCAAATTCCAAACAAATATAAAAC	0.0118415	NA		II			AGCTTTGAAAGCCTGAGCAAATTAGCAAGACAGGCCTGCGGGCTCCTGGCACAGGGCCAA[CG]CTTCACACTTGCCTGGAATCTGAGTATTTGTCCTAGTGTTGATAGTAGAAGAAAAGGAAA	37	13	99159656	CGCTTCACACTTGCCTGGAATCTGAGTATTTGTCCTAGTGTTGATAGTAG	13	97957657	F			NA	NA	STK24	NM_003576;NM_001032296	Body;Body					TRUE				NA
cg00247426	72614403	72614403	72614403	AATATATACCAACTTATCTACCCAAATACTAACAAAACCTCCCTACCACC	0.00396381	NA		II			TAACACGTTGTGATATGTGCCAGCTTGTCTGCCCAGGTACTAACAAGGCCTCCCTGCCAC[CG]CTCAGTCCCTGCCAGAGCCAATCTGCATCCTCGTCTCCACCAATTACAGAGGTGGAGACG	37	1	19051735	CGGTGGCAGGGAGGCCTTGTTAGTACCTGGGCAGACAAGCTGGCACATAT	1	18924322	R			NA	NA	PAX7	NM_013945;NM_002584;NM_001135254	Body;Body;Body					TRUE				TRUE
cg00247631	68788423	68788423	68788423	CAAAAAAATAAAAACTATTTAACTACAATTATTTTCTACCTCTCTAAACC	0.000294109	NA		II			AAAGATAAGGCCAGAAAAGTGGGGGCTATTTGACTACAGTTGTTTTCTGCCTCTCTGGGC[CG]TTCCCGTCCAGCCAGCCCCTTCTCTCCTTAGCTCCACCGCCCCCTCACCCGCGTCCCTGG	37	6	35479350	CGGCCCAGAGAGGCAGAAAACAACTGTAGTCAAATAGCCCCCACTTTTCT	6	35587328	R			NA	NA	TULP1	NM_003322	Body	chr6:35479388-35479678	N_Shore			TRUE				NA
cg00248828	70652367	70652367	70652367	AATACAAACAAACCCAATACTTTCAATACTTCCCATAAACCAAATAAAAC	0.00133248	NA		II			CAGAATATAATGATACAAACAAACCCAGTGCTTTCAGTGCTTCCCATAGGCCAGGTAAAG[CG]TGGTACTGTATTACTATCTCTGACTTACAGATGAAGAGACTGAGGGTCAGAGAGATACCA	37	17	34087579	CGCTTTACCTGGCCTATGGGAAGCACTGAAAGCACTGGGTTTGTTTGTAT	17	31111692	R			NA	NA	C17orf50	NM_145272	TSS1500	chr17:34091136-34091919	N_Shelf			NA				NA
cg00249503	55796320	55796320	55796320	AACCCAAATATCTATTATAAAAAAACCAAAACTTTACRACAACATCTACC	0.00697192	NA		II			AGATAAGGGGAGAAGCACCCGAAGTGGGTCATTTTTATTCTTGGCTAACAGCTCTGGCCA[CG]GCAGATGCTGCCGCAAAGCCTTGGTTTCCTCATAACAGATATTTGGGCCTCACTTATTTT	37	17	76565078	CGGCAGATGCTGCCGCAAAGCCTTGGTTTCCTCATAACAGATATTTGGGC	17	74076673	F			NA	NA	DNAH17	NM_173628	Body					NA	17:74076558-74076687			NA
cg00249511	47635499	43606417	47635499	CAAAAAACAACAACAACAACAAAAAAAACCAAAAAACCATAACAAAATCA	7.46e-06	43606417	CGAAAAACAACAACAACAACAAAAAAAACCGAAAAACCATAACGAAATCG	I	A	Red	CGGCGGAGCCCCCGAGGAGCAGCAGCAGCAGCAGGAGGGGCCGGGGGGCCATGGCGGGGT[CG]GGGCGCAGGAGCTGAGCGCTGCGGCCACGGCCCCGGGCCCCCGCAAGGCCCCTTTATGGC	37	11	627152	CGAGGAGCAGCAGCAGCAGCAGGAGGGGCCGGGGGGCCATGGCGGGGTCG	11	617152	R			NA	NA	SCT	NM_021920;NM_021920	5'UTR;1stExon	chr11:626728-628037	Island			NA	11:616788-618450	11:626473-627651	Unclassified_Cell_type_specific	NA
cg00249576	23740435	23740435	23740435	TCCCACAACACAAAAATCAATACTAACAAATTATCACTACTAACTAAAAC	0.0228702	NA		II			AAGAACAAAGATCCCACAGCACAAAAATCAATGCTAGCAGGTTGTCACTGCTGACTGGGG[CG]GGGGTGGTAGCCAGCTTTTATTCCCTTATTCAGCCCCGCCCACATCCTGCTGATTGGCCC	37	6	28412636	CCCACAGCACAAAAATCAATGCTAGCAGGTTGTCACTGCTGACTGGGGCG	6	28520615	R			NA	NA	ZSCAN23	NM_001012455	TSS1500					NA				NA
cg00250430	53669405	53669405	53669405	RACRACCRATAAATCTTTAAATTTCTTTATATTTCCCCAAAATAAAAACC	0.0192594	NA		II			TGGTCCCTGACGGCGGCCGGTGGGTCTTTGGATTTCTTTGTGTTTCCCCAGAGTGAGGGC[CG]CCAGGCTCAGGCCCCAGCGAAGCCCCGAGCGCCATGGCCGACCCGCAGGCTGGCTCCGCG	37	9	1051579	CGGCCCTCACTCTGGGGAAACACAAAGAAATCCAAAGACCCACCGGCCGC	9	1041579	R			NA	TRUE	DMRT2	NM_001130865;NM_006557;NM_181872	5'UTR;5'UTR;5'UTR	chr9:1051819-1052240	N_Shore			NA	9:1041472-1042305			NA
cg00251405	50758333	50758333	50758333	AAAAAATACTACTATTTTAAACACTATAACTACAAAAATACAATCAATTC	0.00157933	NA		II			AACACTAAGTAAAAGGGTGCTACTATTTTGAACACTGTAACTACAGAAATACAGTCAGTT[CG]ATACATTTGTACACACAGGCACGTGACAGTCACGGGGAGGTGGCTGGTGGGCTCTAGCGG	37	1	33219246	CGAACTGACTGTATTTCTGTAGTTACAGTGTTCAAAATAGTAGCACCCTT	1	32991833	R			NA	NA	KIAA1522	NM_020888	Body	chr1:33219427-33220028	N_Shore			NA		1:33219131-33220885	Promoter_Associated	NA
cg00251610	39606310	61732404	39606310	CAAAACAAAAAAATAAACACCTAAAACACACATCCTACTTTTTCTACCCA	0.000323831	61732404	CAAAACGAAAAAATAAACACCTAAAACGCGCGTCCTACTTTTTCTACCCG	I	A	Red	CCGCGTCCTGCTCCGCCGTTCTGGGACGTCGGGGACAAAAGTGGAGGAGACGGGAGAGCC[CG]GGCAGAAAAAGCAGGACGCGCGTCCCAGGTGCCCACCTCTTCGCTTTGAGGCGGGGGCGG	37	5	158527817	CAAAGCGAAGAGGTGGGCACCTGGGACGCGCGTCCTGCTTTTTCTGCCCG	5	158460395	F			NA	NA	EBF1	NM_024007	TSS1500	chr5:158527374-158527983	Island			NA	5:158459953-158460634	5:158527321-158527838	Unclassified	NA
cg00251678	35733508	35733508	35733508	ACCAAAACCCAATTCTAACTACTCAAAAACCTACTCAAATCACTAACCAC	0.0260338	NA		II			CTGACTGTCTGGCCAGGACCCAATTCTGGCTGCTCAGAAGCCTGCTCAAATCACTGACCA[CG]TGTCCCTCTCCCAGCATCCCCTAACACGCCCCAAGACACCTGCCCTGTACAAAAGAGGAC	37	1	3305629	CGTGGTCAGTGATTTGAGCAGGCTTCTGAGCAGCCAGAATTGGGTCCTGG	1	3295489	R			NA	NA	PRDM16	NM_022114;NM_199454	Body;Body	chr1:3307069-3307285	N_Shore			NA				NA
cg00251716	21600496	21600496	21600496	AAACAAAAAATCTTTCTCTAAAATATACTTTATTTCATATATACTCAACC	4.66e-06	NA		II			TCGCCAAGTGAGGACAGAGGGTCTTTCTCTGGGGTGTGCTTTATTTCATATGTGCTCAGC[CG]GCCTACCCTGGCTCTTCTAATACATATTAATGCTTTTCTCTCCCTGACTTATGAGGACAG	37	1	243479948	GACAGAGGGTCTTTCTCTGGGGTGTGCTTTATTTCATATGTGCTCAGCCG	1	241546571	R			NA	NA	SDCCAG8	NM_006642	Body					TRUE				NA
cg00251767	28650325	28650325	28650325	AAAAAACACCTACAAAAACAACCAAAAAAATAACCTCACAAATACCTACC	0.029333	NA		II			AAGTCAAAGAAAAAGGGCACCTACAGGAACAGCCAAAAAGGTGGCCTCACAGGTACCTGC[CG]GAGCGCCAGCAGCCAGGTTCAACAGCACAGAGAGTGAACGCCAGAACAGTAAGAGAGCTG	37	8	60010714	CGGCAGGTACCTGTGAGGCCACCTTTTTGGCTGTTCCTGTAGGTGCCCTT	8	60173268	R			NA	NA	TOX	NM_014729	Body					TRUE				NA
cg00252121	43691332	43691332	43691332	ATCTTAATCTTAAATATTCCAACCTCCAAAACTATAAAAAATAAATATTC	0.00103605	NA		II			CTTTATCTTAGTCTATTCAAGCCACTATAAAAAAATTAAGACTGAGCGGCTTATAAACAA[CG]AACATTTATTTTTCACAGTTCTGGAGGCTGGAACATCCAAGATCAAGACACTGGAAGAAG	37	13	29875027	TCTTGATCTTGGATGTTCCAGCCTCCAGAACTGTGAAAAATAAATGTTCG	13	28773027	F			NA	NA	MTUS2	NM_001033602	Body					TRUE				NA
cg00252230	29741382	29741382	29741382	TAATAATTCRCAATAACAACCTTACCCCTAAAATAACCTCATATTAAAAC	7e-07	NA		II			AAATTAAACTGGAGAAGGCACTGAGGGTGCAGCAGAGCTCTGAGAGCAGCACCAGCTCCC[CG]TCTCAACATGAGGCCACTCCAGGGGCAAGGTTGCTACTGCGAATCACCAAAAGAACATGG	37	6	66013901	GGTGATTCGCAGTAGCAACCTTGCCCCTGGAGTGGCCTCATGTTGAGACG	6	66070622	F			NA	NA	EYS	NM_001142800	Body	chr6:66011253-66011481	S_Shelf			NA				NA
cg00252282	26677324	26677324	26677324	CRTCCAAAAAACRCTACTTCTTTACRAAAATTTAACTACTACRTTCATTC	0.00262191	NA		II			GAGTGGGTGCGCGTCCAGGAGGCGCTGCTTCTTTGCGGGAGTTTGGCTGCTGCGTTCATT[CG]TCGTCTGCGCTTCAGATGCACGGCACTGAGACCCTTGCGTCCGACGGTGTCGGGGCTGTG	37	12	5542736	GTCCAGGAGGCGCTGCTTCTTTGCGGGAGTTTGGCTGCTGCGTTCATTCG	12	5412997	R			NA	NA	NTF3	NM_001102654	Body	chr12:5541210-5542973	Island			TRUE	12:5411365-5413421	12:5541977-5543226	Unclassified	NA
cg00252418	53766446	53766446	53766446	ATACRCRAAAAACTCCAAAAACAAACTATACAAAAAAATACTCAAAAAAC	0.00256011	NA		II			AATGAAAAACCCCTGCGAGCCCTGCGGGGCGGGGAGGGAGACCTGGTGTGTGGTGCTGGA[CG]CTTCCTGAGCACCTCCCTGCACAGCCTGCCTCTGGAGTTTCTCGCGCATGGCGGTAAGCA	37	7	154540325	CGCTTCCTGAGCACCTCCCTGCACAGCCTGCCTCTGGAGTTTCTCGCGCA	7	154171258	F			NA	NA	DPP6	NM_001936;NM_130797;NM_001039350	Body;Body;Body	chr7:154542059-154542348	N_Shore			NA	7:154171213-154171312			NA
cg00252594	41784394	41784394	41784394	TCTAAACAACCCAAAAAAAAACTCCAAAAACCTCCAAATAATCTAAAATC	0.00291736	NA		II			CACATCTCAAGCTGAGGCAAATCCACTCTCCAGCCCAAGCGCAACCCTGACCCTGATCTC[CG]ACCCCAGACCACTTGGAGGCCCCTGGAGCCTCTTCCTGGGCTGTTCAGAGGCATGATCCA	37	14	102974737	CTGAACAGCCCAGGAAGAGGCTCCAGGGGCCTCCAAGTGGTCTGGGGTCG	14	102044490	F			NA	NA	ANKRD9	NM_152326	5'UTR	chr14:102973317-102976666	Island			NA				NA
cg00252615	38806465	38806465	38806465	TAAACRCRCRTCTTTAAATAAACTCCTATAAACCTAAAAATCTATAAAAC	3.51e-05	NA		II			TTCTAGGTTAGGAACAGGTAAAGCCCAGCACCATGAACATACTGCTGATCTACCGCGCGG[CG]CTCTATAGACTCCCAGGCTCATAGGAGCCCATCCAAAGACGCGCGCTTACTCACACACAC	37	5	160976283	AAGCGCGCGTCTTTGGATGGGCTCCTATGAGCCTGGGAGTCTATAGAGCG	5	160908861	F			NA	NA	GABRB2	NM_000813;NM_021911	TSS1500;TSS1500	chr5:160974692-160975384	S_Shore		DMR	NA	5:160908262-160908907			NA
cg00252814	43718437	43718437	43718437	TAAACTCTAAACCTCCATATTCTTATTTATAAAACATAAAAACCATTCCC	0.00326884	NA		II			CCGAGCACCCTTGGGCTCTAGACCTCCATGTTCTTATTTGTAAGGCATAGAGACCATTCC[CG]CCCTGGGCTGTCACAAGGATTTAACCCCATCGCCTATGTGACATATACCTCCCACCCCAA	37	7	150647757	GGGCTCTAGACCTCCATGTTCTTATTTGTAAGGCATAGAGACCATTCCCG	7	150278690	R			NA	NA	KCNH2	NM_172056;NM_172057;NM_000238	Body;Body;Body	chr7:150647991-150648918	N_Shore			NA				TRUE
cg00252934	44640334	44640334	44640334	AAAACACATAAAAAAAACCAACAAAAACACCAACCCTTTTATACACATAC	0.00668517	NA		II			CTAGTTTGTATTTCCTGCATTGGGGAACTGAGGAAGGGTGTCAGGAAGGTGACTGTCAAA[CG]CATGTGCACAAAAGGGCTGGTGTTCTTGTTGGTTTTTCTTATGTGCTTCACACACAGTAG	37	3	36782736	CGCATGTGCACAAAAGGGCTGGTGTTCTTGTTGGTTTTTCTTATGTGCTT	3	36757740	F			NA	NA	DCLK3	NM_033403	TSS1500					NA				NA
cg00253182	66693478	66693478	66693478	AAACTTCCTAAATAAACACTTCTATATACCCACTACTTTACACAATACCC	0.00194686	NA		II			TACCAGATGCTGAGCTTCCTAGATAAGCACTTCTGTATGCCCACTACTTTGCACAGTGCC[CG]TTAGCCAGGGATGCTCACTATGTGTTGCTTCAACAAATAAATGAATGTGGTGGATTGTAG	37	9	2619314	CGGGCACTGTGCAAAGTAGTGGGCATACAGAAGTGCTTATCTAGGAAGCT	9	2609314	R			NA	NA	FLJ35024	NR_015375	Body	chr9:2621308-2623685	N_Shore			NA				NA
cg00253346	42790465	42790465	42790465	TTTTCTCCAAAACTATATATCCTCTCCTACTCACCTCTATATCTCACTAC	0.00700743	NA		II			ACACCTGCTCCTTTTCTCCAGGGCTATGTGTCCTCTCCTGCTCACCTCTGTGTCTCACTG[CG]GGCCCCTCCTGTCTATCTCTGCTCCCCAGTGTTTGGGGTCCCCAACTGTCTGTCACCCGT	37	22	42324281	TTTCTCCAGGGCTATGTGTCCTCTCCTGCTCACCTCTGTGTCTCACTGCG	22	40654227	R			NA	NA	TNFRSF13C	NM_052945	TSS1500	chr22:42322043-42322909	S_Shore			NA				NA
cg00253398	26748382	26748382	26748382	ATAACCCAAAAACTAAATCTCAAAAAACAAACCTACACTAAATTAATCCC	0.00109682	NA		II			CCACACAGCACACTGATGCTTGGGCAGGGAATGAGCAGGGAGAAGGGATCTTAATGACGA[CG]GGACCAACTCAGTGCAGGCTTGTTTCCTGAGACTCAGCCCCTGGGTCATACCTGATTGCC	37	22	46833806	CGGGACCAACTCAGTGCAGGCTTGTTTCCTGAGACTCAGCCCCTGGGTCA	22	45212470	F			NA	NA	CELSR1	NM_014246	Body	chr22:46834984-46835285	N_Shore			NA				NA
cg00253403	37762463	37762463	37762463	ACTCTAACATTACAAAACAAACTTCCTTAAAAAAAATCAAACCCTACAAC	0.0221508	NA		II			CACCCTGAATTACTCTAACATTACAGGGCAGACTTCCTTGAGAAGAGTCAGACCCTGCAG[CG]GGGCTCTGCCTTCCCACTGTCAGCCTCGGGGTCATCTAGCTTTATCGATCCCCATGGAGC	37	4	71553554	CTCTAACATTACAGGGCAGACTTCCTTGAGAAGAGTCAGACCCTGCAGCG	4	71772418	R			NA	NA	UTP3	NM_020368	TSS1500	chr4:71553854-71554473	N_Shore			NA		4:71553381-71555007	Promoter_Associated	NA
cg00253564	38619355	38619355	38619355	ACAATATATAAACTCCCCAACTCCTTACTAAACTCCACTAAACACTATTC	1.29e-12	NA		II			CAGGGCCACAAGTGTCCTCCTCCATGCCCCCTTGTGACCTGGGACGCCCTGACTAGACCT[CG]AACAGTGCCCAGTGGAGCCCAGCAAGGAGCTGGGGAGTCCACACACTGTCCCGTGGCCAC	37	1	6552403	CAGTGTGTGGACTCCCCAGCTCCTTGCTGGGCTCCACTGGGCACTGTTCG	1	6474990	F			NA	NA	PLEKHG5	NM_198681;NM_001042663;NM_020631	Body;Body;TSS1500	chr1:6550083-6551115	S_Shore			NA				NA
cg00253854	72652326	59641359	72652326	CATTTTTTTAACCAATCTAAAAAACACAATATTCAAATAAAAATAACCCA	0.00259088	59641359	CGTTTTTTTAACCGATCTAAAAAACACAATATTCGAATAAAAATAACCCG	I	A	Red	CTCGTGGTTCGCCGTTTTTTTAGCCGGTCTGAAAAGCACAATATTCGGGTGGGAGTAACC[CG]ATTTTCCAAGTGCGTCCATCACCCCTTTCTTTGACTCGCAAAGGGGACTCCCTGACCCCT	37	8	35391321	CGGGTTACTCCCACCCGAATATTGTGCTTTTCAGACCGGCTAAAAAAACG	8	35510863	R			NA	NA	UNC5D	NM_080872	Body					NA	8:35510769-35511097			NA
cg00254681	12625300	65747450	12625300	TAAAAATACCCCAACAACAAAACCAAAAAAAACATAATAAAAAAACCTCA	0.0212911	65747450	TAAAAATACCCCGACAACAAAACCGAAAAAAACGTAATAAAAAAACCTCG	I	A	Red	AGCGCAGCCGGGTGGGGGTGCCCCGGCAGCAGGGCCGGGAGGGGCGTGGTGGGGGGGCCT[CG]GCAGCGTGGCAGAGGAGGAGGGACCGCGCTGAGCGGTGGCCGCGGAAGAGGCCAGGCCCC	37	6	32118457	TGGGGGTGCCCCGGCAGCAGGGCCGGGAGGGGCGTGGTGGGGGGGCCTCG	6	32226435	R			NA	NA	PRRT1	NM_030651	Body	chr6:32118101-32118544	Island			NA	6:32226113-32226480			NA
cg00254714	24669381	24669381	24669381	ATAAAAATACACACAATACCCACAAAATAAACCCTAAATCTCTAAATAAC	0.00464056	NA		II			AAAGCATCCTCATAAAGGTGCACACAGTACCCACAAAGTAAGCCCTGAATCTCTAAGTGA[CG]GTTGGCTAATGGTGTTGGCCGAGTTTACAAAAAAGGAAAGCTGAGCGCAGGTGATGGGGT	37	20	2309923	TAAAGGTGCACACAGTACCCACAAAGTAAGCCCTGAATCTCTAAGTGACG	20	2257923	R			NA	NA	TGM3	NM_003245	Body	chr20:2308778-2309042	S_Shore			NA				NA
cg00255099	47782459	47782459	47782459	ACTACAATAAAACTACTTATAATTTCCAAACRTCRACAAAAACTAAAAAC	0.00345025	NA		II			GAATAAATACAACTGCAGTGGGGCTGCTTGTGGTTTCCAAACGTCGGCAGAGGCTGGAGA[CG]GCTCTCTAGTGCTGGGTGTGGAGTGAGGCACCACCCTTGCCCTGAAGCCTGGGGCACTCA	37	5	1225525	CTGCAGTGGGGCTGCTTGTGGTTTCCAAACGTCGGCAGAGGCTGGAGACG	5	1278525	R			NA	NA	SLC6A18	NM_182632;NM_182632	5'UTR;1stExon	chr5:1226976-1227305	N_Shore			NA				NA
cg00255368	46611335	46611335	46611335	AAACTAACRAACTACCCTTTCCAAACTACCCCAAAAACCTAAAAAACTAC	1.71e-07	NA		II			CTGGGGCTCGAGAGCTGACGGACTGCCCTTTCCAGGCTGCCCCAAGGGCCTGGGAGGCTG[CG]GTACCGCCTGTCGGTCCCGGTCCCGAGCGCGCTTGCTTAAGAGTTCTCAAAGACGGGGTT	37	1	217310887	CGCAGCCTCCCAGGCCCTTGGGGCAGCCTGGAAAGGGCAGTCCGTCAGCT	1	215377510	R			NA	NA	ESRRG	NM_001134285	5'UTR	chr1:217310749-217311178	Island			NA	1:215377373-215378417			NA
cg00255726	35751385	35751385	35751385	AAAAAACTAAAAACCCAAATAAAAATACTACTTTTTTCTATTTTTAAAAC	0.00603954	NA		II			GGTTGCAGTGAGCCGAGATTGTGCCATTGCACTCCAGCCTGAGCGACAAGAGCAAAACTC[CG]TCTCAAAAATAGAAAAAAGCAGCACCCTCACCTGGGCCCCCAGCCTTCCCCTCTCCCACC	37	8	21769114	GAAGGCTGGGGGCCCAGGTGAGGGTGCTGCTTTTTTCTATTTTTGAGACG	8	21825060	F			NA	NA	DOK2	NM_003974	Body	chr8:21769694-21770080	N_Shore			NA		8:21769040-21770143	Unclassified	NA
cg00255882	63789443	63789443	63789443	TACTACRAATAAACRTACTATAAACATTCTTACACATACCTTTAATAAAC	0.000107951	NA		II			GCTAAATGTACGCTTACCTTGTGACCCCAGAAATTTCACTTCAAGAGGAATGAGTGCATA[CG]TCCACCAAAGGCATGTGCAAGAATGTCCATAGCACGTTTATTCGTAGTAGTAAAAAACTG	37	2	128569347	CGTCCACCAAAGGCATGTGCAAGAATGTCCATAGCACGTTTATTCGTAGT	2	128285817	F			NA	NA	WDR33	NM_001006623;NM_018383;NM_001006622	TSS1500;TSS1500;TSS1500	chr2:128568321-128569064	S_Shore			NA		2:128567836-128569667	Promoter_Associated	NA
cg00255919	21694384	21694384	21694384	ACTCAAATTACAATACRCCAAAATAAAATTAACCCATACATTTCCTCTAC	0.00133881	NA		II			CAGGCTATAAATAGACACACCCATGCAACATTCGACTTGCCAGTCACTCTACCTCCCTCC[CG]TAGAGGAAATGCATGGGTTAATCCCATTCTGGCGCATTGCAATCTGAGTGCTGTGACCAA	37	5	131827918	CTCAGATTGCAATGCGCCAGAATGGGATTAACCCATGCATTTCCTCTACG	5	131855817	F			NA	NA	IRF1	NM_002198	TSS1500	chr5:131825842-131826935	S_Shore		RDMR	NA		5:131827803-131828004	Unclassified_Cell_type_specific	NA
cg00256201	37631376	37631376	37631376	CTCAAATCTTTAACCCATATATAACCTTAAAAAAATTACTTAATCTTTCC	0.000180243	NA		II			CTGAAGTGAGTAAGGGAGGTAATTGCTGTTTCTGTCTTATATTATGAGGAAGCTGAAGCT[CG]GAAAGACTAAGTAACTTTCCCAAGGCCACACATGGGTTAAAGACCTGAGCTCAGGTCTTC	37	2	84803398	CGGAAAGACTAAGTAACTTTCCCAAGGCCACACATGGGTTAAAGACCTGA	2	84656909	F			TRUE	NA	DNAH6	NM_001370	Body					NA				NA
cg00256873	13643358	13643358	13643358	CCAAAATACACACAAAACAACAAAAATACCRAAATACTATAAACACAACC	0.00803065	NA		II			CCATCAGGGTGCCAAGGTGCACACAGGACAACAAGGGTGCCGGGGTGCTGTGGGCACAGC[CG]CTGTTGCCGCCTACCTGCTGGGCCTGCTGCAGCAGCTCCATGCGCTCCCGCAGGATCTGG	37	4	6037615	CGGCTGTGCCCACAGCACCCCGGCACCCTTGTTGTCCTGTGTGCACCTTG	4	6088516	R			NA	NA	JAKMIP1	NM_001099433	Body					TRUE	4:6088496-6088615			NA
cg00257303	47639473	47639473	47639473	TAATTATTTATACTACAATTATCTATACCTAAAACCTCCTTCCCCAAAAC	0.00178601	NA		II			TGAAATGAGGGATTTTCTTGAAACAACCCTCACGCAGGTACCCCTTGGGCAGCCTTCAAC[CG]CTCTGGGGAAGGAGGCCCCAGGCATAGACAACTGCAGTATAAATAATCATCCCTACAGTG	37	4	123300294	CGCTCTGGGGAAGGAGGCCCCAGGCATAGACAACTGCAGTATAAATAATC	4	123519744	F			NA	NA	ADAD1	NM_139243;NM_001159285;NM_001159295	5'UTR;TSS1500;TSS1500	chr4:123300407-123300805	N_Shore			NA				NA
cg00257712	49762302	49762302	49762302	AATCATTCCAAAAATATTAAACRTCATTACTACAAACCTCRACAAATACC	0.000512472	NA		II			TTCTCCTGGGATCCAGGGTTGGGGTCTGAGCTCCCTGTGGTGGTCATTAAGCCCCTCACA[CG]GCACCTGCCGAGGTTTGCAGCAATGACGTTTAATACTTCTGGAATGATTAGGAATCTGAG	37	4	2251938	CGGCACCTGCCGAGGTTTGCAGCAATGACGTTTAATACTTCTGGAATGAT	4	2221736	F			NA	NA	MXD4	NM_006454	3'UTR					NA	4:2221736-2221833			NA
cg00257893	26668482	26668482	26668482	AAAAATTCCTCCTCTCTAAACCCACAAAAATAATACAAACTTTCCTCTAC	0.00188812	NA		II			TCCAACAGATCAGAAGTTCCTCCTCTCTGAGCCCACAAAAATAGTGCAGACTTTCCTCTA[CG]GAAGTCAAGATGAAACAAATGTGTTCCCCATTTCATTAGGCCCCTATGAACACCCAGATC	37	6	138820840	GAAGTTCCTCCTCTCTGAGCCCACAAAAATAGTGCAGACTTTCCTCTACG	6	138862533	R			NA	NA	NHSL1	NM_001144060;NM_020464	TSS1500;Body					NA				NA
cg00259367	40688495	40688495	40688495	AAACAAAAAAACAAATCCATATCTCTAAAACTATTTCCTCAAACCATAAC	2.96e-06	NA		II			CTTCAGTGGGAGAGCAGGGAAGCAAATCCATGTCTCTGGAGCTGTTTCCTCAGGCCATGG[CG]GTGCCTTTCTGCTCGGACTCCCCTCCCACAGATAAGTAGGGTGTCCACTCTTGGAGTTTG	37	1	21057579	CGCCATGGCCTGAGGAAACAGCTCCAGAGACATGGATTTGCTTCCCTGCT	1	20930166	R			NA	NA	SH2D5	NM_001103160;NM_001103161	5'UTR;5'UTR	chr1:21058006-21059366	N_Shore			NA				NA
cg00259404	67760440	67760440	67760440	TCCTAACATATATACTTTAATTCTCATTTCCACCTACCTTCTCAAAAACC	0.00026496	NA		II			CTGACACTAATTCCTGGCATATGTACTTTAGTTCTCATTTCCACCTGCCTTCTCAGGAAC[CG]CACATTGCTGATCAGTACATGGTTTCTTTCTTCCTTTCTTTTTTTTTTTTTTGGAGACAG	37	6	28885568	CCTGGCATATGTACTTTAGTTCTCATTTCCACCTGCCTTCTCAGGAACCG	6	28993547	R			NA	NA	TRIM27	NM_006510	Body					NA				NA
cg00259834	35736456	35736456	35736456	CTCAAACTAAACTCTACATCCTCTTTTACCTTCAATAAAATTTCTAACCC	0.000938265	NA		II			TTGATATACAAATGCAGCCAGAGGATGACGTGCCAGCTCTGGGGCTTTGAATCACTCAGG[CG]GGCCAGAAACCCCACTGAAGGCAAAAGAGGATGCAGAGCTCAGTCTGAGGTTAGAGTGAT	37	3	16553499	CGGGCCAGAAACCCCACTGAAGGCAAAAGAGGATGCAGAGCTCAGTCTGA	3	16528503	F			NA	NA	RFTN1	NM_015150	5'UTR	chr3:16554327-16555413	N_Shore		RDMR	NA		3:16553314-16554247	Promoter_Associated	NA
cg00259882	28685463	29774362	28685463	AAATCCACCTATTTACAAAACACAATACAACCCTACTATATACAAAACCA	0.0283309	29774362	GAATCCACCTATTTACAAAACGCGATACGACCCTACTATATACAAAACCG	I	A	Red	TAACCTTGGTCACCAACAGATGTGAGGGCACGTGACGTTCGGGCTGCGCCCTCCCCGCCC[CG]GCCCTGCACACAGTAGGGCCGCACCGCGCTTTGCAAACAGGTGGACTCGGCAGAGGCGCG	37	11	70049130	GAGTCCACCTGTTTGCAAAGCGCGGTGCGGCCCTACTGTGTGCAGGGCCG	11	69726778	F			NA	NA	FADD	NM_003824	TSS200	chr11:70049099-70049806	Island			NA	11:69726748-69728048	11:70048795-70050757	Promoter_Associated	NA
cg00259887	26652313	22744506	26652313	AAAAAACTAAAAACAAATTTCCCAATAAAAAAACAACCATAACAACTACA	0.014654	22744506	AAAAAACTAAAAACGAATTTCCCGATAAAAAAACGACCATAACAACTACG	I	C	Grn	GCGGGGCTAGAGGAGGGGCTGGGGGCGGGTTTCCCGATGAAGGGGCGGCCATGGCAGCTG[CG]CAGAGGCAACGCAGGCTGCTACGGAGCGCGCGCCCGGCTTTGAATGAGCGGGGCTGGGAG	37	8	110551965	CGCAGCTGCCATGGCCGCCCCTTCATCGGGAAACCCGCCCCCAGCCCCTC	8	110621141	R			NA	NA	EBAG9	NM_004215;NM_198120;NM_198120	TSS1500;5'UTR;1stExon	chr8:110551736-110552643	Island	high-CpG:110621092-110621287		NA	8:110620913-110621819	8:110551311-110553124	Promoter_Associated	NA
cg00260116	52679392	52679392	52679392	TAATTTTACTACTATACTACTCTCCTTAAATACATCCTATACCTAACCAC	0.00271115	NA		II			GGCCAAAAGGTCCATTTTATTGTCATACAATCGTGGTCACCGTGACAAGGAGGGTGGCAG[CG]TGGCCAGGCACAGGATGCACCCAAGGAGAGCAGCACAGTAGCAAAACCAGAGCTGCGGAA	37	7	100813838	GGTTTTGCTACTGTGCTGCTCTCCTTGGGTGCATCCTGTGCCTGGCCACG	7	100600558	F			NA	NA	C7orf52	NM_198571	3'UTR	chr7:100815484-100816995	N_Shore			NA				NA
cg00260201	41737332	41737332	41737332	TACAAATAACAAATCACACACCCTCAAAAAAAAACTACACRAACCAAATC	0.0240937	NA		II			TATGTCTTAAATACTATTATAGTAGGAAAGGGAGAGGAGAAAATTCCCCACCCACTCCCC[CG]ATTTGGCCCGTGTAGCTTCCCTTTGAGGGTGTGTGACTTGCCATCTGCAAAAGTCATGGC	37	17	46029581	GCAGATGGCAAGTCACACACCCTCAAAGGGAAGCTACACGGGCCAAATCG	17	43384580	F			NA	NA	PRR15L	NM_024320	3'UTR					NA				NA
cg00260803	28787395	28787395	28787395	AACTAAAAACAAAACTTATACCTACCAACCCCTAACACRCATTATATCTC	0.0014516	NA		II			AGCGGGACTGGGGCTGGGGGCAGGGCTTATGCCTGCCAGCCCCTGACACGCATTGTGTCT[CG]CAGCTGATGCGGAACCTCCTTGGCACCCACCTGGGCCACAGCGCCATCTACAACATGTGC	37	16	2107101	GCTGGGGGCAGGGCTTATGCCTGCCAGCCCCTGACACGCATTGTGTCTCG	16	2047102	R			NA	NA	TSC2	NM_001077183;NM_000548;NM_001114382	Body;Body;Body	chr16:2105014-2105390	S_Shore			NA				TRUE
cg00260889	62650338	62650338	62650338	AATTAAAACCRTAATAAAAATTTCTTCCATTTCCACTTTAATAACTTAAC	0.00168428	NA		II			CTTAAATTCGTGATTAAAACCGTGATGGAGGTTTCTTCCATTTCCACTTTAGTAACTTAG[CG]AATTCCCTGCCTGTCTGTCTCCTGTCTCTCTTTCAAACTAAATGCAAAGAAGGAGAAGGA	37	4	80869858	CGCTAAGTTACTAAAGTGGAAATGGAAGAAACCTCCATCACGGTTTTAAT	4	81088882	R			NA	NA	ANTXR2	NM_058172	Body					TRUE				NA
cg00260937	30719448	30719448	30719448	AAAATCCCTAAAAACTCCTAAAAAATACTTAATTTTCTAAAAAAATCTAC	0.00985842	NA		II			CCTTGTCCTGCACTCAGCCCCAGACACTGTCAGACACACCGCCCTCCCCGCCATGCCTCT[CG]CAGACCCTCCCAGAAAACCAAGCATCTCCCAGGAGTCTCCAGGGATCTCCAGGACTCTGG	37	7	128520193	CGCAGACCCTCCCAGAAAACCAAGCATCTCCCAGGAGTCTCCAGGGATCT	7	128307429	F			NA	NA	KCP	NM_001135914	Body					TRUE		7:128520007-128520656	Unclassified	NA
cg00261325	45676333	33703344	45676333	AAACACCCCTCAACATATAAACTCATAAAATAATAACACTAATCTCATCA	0.0205026	33703344	AAACGCCCCTCGACGTATAAACTCATAAAATAATAACACTAATCTCGTCG	I	C	Grn	CTACTCAGATGTGAGCGCCCCTCGACGTGTGGGCTCATGGGGTGATGGCACTGGTCTCGT[CG]CTGGCAGAAGACGGTCATACCGCGATGCCCTTGGTTTCCAGGATGAGGCTGGGCACATGC	37	5	178199408	GAGCGCCCCTCGACGTGTGGGCTCATGGGGTGATGGCACTGGTCTCGTCG	5	178132014	R			NA	NA	AACSL	NR_024035	Body					NA	5:178131969-178132039			NA
cg00261569	67609390	67609390	67609390	CCACCTTAAAAAAACCTACCAAAAAACTAATTCTTCAAAAAAATATTCTC	0.0174447	NA		II			GGGAGTGAAATCCACCTTAGGAAGACCTGCCAAAAAGCTGATTCTTCAAAAAAGTGTTCT[CG]AAATCTTAGTGTAACTGGCACCAACACCCATCCCCAATGCCTCGTTTTTTTTCCAGCAGA	37	3	119216728	CGAGAACACTTTTTTGAAGAATCAGCTTTTTGGCAGGTCTTCCTAAGGTG	3	120699418	R			NA	NA	C3orf1	NM_016589	TSS1500	chr3:119217308-119217756	N_Shore			NA				NA
cg00261665	57627458	57627458	57627458	AAAAAAACAAAATCCCAAACTAATCCCACCTCCAACCCRTAATCCTTAAC	0.0027379	NA		II			CTTCTATGCCAAGCGTCTGACGCTCGAGGAGCTGTTGGCTGTGGAGGCCGGCGCAACACG[CG]CCAAGGACCACGGGCTGGAGGTGGGACCAGCCTGGGACTCTGTCCCTTTCCCAATTTCCT	37	3	131101138	AAGGGACAGAGTCCCAGGCTGGTCCCACCTCCAGCCCGTGGTCCTTGGCG	3	132583828	F			NA	NA	NUDT16	NM_152395	Body	chr3:131100341-131101151	Island			NA		3:131099999-131101499	Promoter_Associated	NA
cg00261832	55602437	55602437	55602437	AAAATACACATCCTAACTATCACTAAAACTACAAACAAATCAATAAACAC	0.0234397	NA		II			TTGATGGCTGGAGAATGCACATCCTAGCTGTCACTGGGGCTACAGGCAGGTCAGTGAGCA[CG]CTAAAATTTTCCTTCTCAATTACACTTCAAATAGCAGGCATATTACTCGTATAAGATGCT	37	6	132270033	GAATGCACATCCTAGCTGTCACTGGGGCTACAGGCAGGTCAGTGAGCACG	6	132311726	R			NA	NA	CTGF	NM_001901	3'UTR	chr6:132271356-132271658	N_Shore		RDMR	NA				NA
cg00261900	57630500	57630500	57630500	AACAACRACCAAACCRAAAACCAAATAAAATCTAAACAAACAAAAAAACC	0.0204629	NA		II			AAAATAGCGGTGGCAGCGGCCAGGCCGGGAGCCAGGTAGAGTCTGAGCAGGCAGGGGGGC[CG]CGCAGGACTGGCCTGCTGGGCCAGGGGGCTGGGTGGGGGTCAAGTTGAGTCGTCCTGAGG	37	6	44194802	CGGCCCCCCTGCCTGCTCAGACTCTACCTGGCTCCCGGCCTGGCCGCTGC	6	44302780	R			NA	NA	SLC29A1	NM_001078174;NM_001078176;NM_001078175;NM_004955;NM_001078177	5'UTR;5'UTR;5'UTR;5'UTR;5'UTR	chr6:44191278-44191872	S_Shelf	low-CpG:44302716-44302995		NA		6:44194695-44194838	Unclassified_Cell_type_specific	TRUE
cg00262344	28600479	28600479	28600479	ACTCACAAACACTACTTAAATAACAAAAACTAACAAACRCRAAAACATCC	0.00326797	NA		II			GAATGCCGTCAACTCACAGGCACTGCTTGGGTGACAAAGGCTGGCAAGCGCGAGGACATC[CG]CAGGCAGCCAAAGGAGCAAGGACTTCCGTGAAGCAGCCGAAGCGCGGGCGCGGGGACTTC	37	18	23713741	CTCACAGGCACTGCTTGGGTGACAAAGGCTGGCAAGCGCGAGGACATCCG	18	21967739	R			NA	NA	PSMA8	NM_144662;NM_001025097;NM_001025096	TSS200;TSS200;TSS200	chr18:23713728-23713953	Island			NA	18:21967624-21968062	18:23713712-23714394	Unclassified_Cell_type_specific	NA
cg00262446	35735375	35735375	35735375	TAAATAACCACTACCCATTCCTACTTATTTTAAAAACTCTAATAAAAAAC	0.00322157	NA		II			TGTAGTGAATGTGAATAGCCACTGCCCATTCCTACTTATTTTGGGGGCTCTGATAAAGAA[CG]GGAGGAAATACACACACTCCCTTTGGGAGTTCAGCAGAGAGGAGATTTATTGTTTCAGTC	37	4	101439228	GAATAGCCACTGCCCATTCCTACTTATTTTGGGGGCTCTGATAAAGAACG	4	101658251	R			NA	NA	EMCN	NM_016242;NM_001159694;NM_001159694;NM_016242	5'UTR;5'UTR;1stExon;1stExon					NA				NA
cg00262621	35647431	35647431	35647431	RTCCCAACAAAAAATTAATTAAAAAACRTCCCAAACAAAATCTAAAAACC	0.000211688	NA		II			TGTGGGGTCCCGTCCCAGCAGGGAGTTAGTTGGGGGGCGTCCCAGGCAGGGTCTGGGGGC[CG]GGCGCACGCAGGCGGGGTGACGAGCTGGGGGGGCGGGGGGCGGTGTCGGAGCAAATACGG	37	1	1566374	CGGCCCCCAGACCCTGCCTGGGACGCCCCCCAACTAACTCCCTGCTGGGA	1	1556237	R			NA	NA	MMP23B	NM_006983	TSS1500	chr1:1564421-1570006	Island			TRUE	1:1555322-1559857			NA
cg00263677	63687430	70671504	63687430	AATAAAAACCCTCTCAAAACCATCTAATATACCTACAATAACATAACACA	5.63e-05	70671504	AATAAAAACCCTCTCAAAACCATCTAATATACCTACGATAACGTAACGCG	I	A	Red	GTTGGGAGGAAAAATAGAAGCCCTCTCAAAACCATCTGGTGTGCCTGCGGTGGCGTGGCG[CG]GCTCAGCAGCCCACATGGATGAGCGCAGCGGGTGTGTCATTGCCTGGGAGGGACGCAGGC	37	16	84885230	CGCGCCACGCCACCGCAGGCACACCAGATGGTTTTGAGAGGGCTTCTATT	16	83442731	R			NA	NA	CRISPLD2	NM_031476	Body					TRUE				TRUE
cg00264754	73749497	73749497	73749497	ACAAAAAACTCCACAATCACCRAAACATAACATATAAAATAATTCTAATC	0.015657	NA		II			CATTGAGGTCTGCAGGGGGCTCCACAATCACCGGAGCATAGCATGTGAAGTAATTCTGGT[CG]AGCTCTCCAATGTACCTCCCCTTTAGATTGGGAGGAGTGTTACACCGGGCACAACAAGCT	37	11	40136810	CAGGGGGCTCCACAATCACCGGAGCATAGCATGTGAAGTAATTCTGGTCG	11	40093386	R			NA	NA	LRRC4C	NM_020929	Body					NA				NA
cg00265277	16762411	16762411	16762411	TAACAAAAAATAACTAAAAACCCACTAAAACTTAAACCTCAAACTCTACC	0.0221	NA		II			CCCAGAGGCAGTGGCAGGAGGTGACTGAGGGCCCACTGGAGCTTGAACCTCAGGCTCTGC[CG]GCTCCACCAGCCCTGCAGGGGGAGCAGCCCTGCCAGAGGAGCAGCTGGTACAACCCCTTC	37	9	140731552	GGCAGGAGGTGACTGAGGGCCCACTGGAGCTTGAACCTCAGGCTCTGCCG	9	139851373	R			NA	NA	MIR602	NR_030333	TSS1500	chr9:140728478-140729896	S_Shore			NA				NA
cg00265788	39603415	39603415	39603415	TAAAAAAAAACCTAAAAACCTAACCCAATTCTTAATAACAAAAATACRAC	0.000673315	NA		II			CGGCCCCGGGCCTGCAGTTGCTGCTCCCGCTGCAGCTGGCTCTTGCGAGCTTCCCGCAGC[CG]TCGCACCTCTGTCATCAAGAATTGGGTCAGGCCCTCAGGCCCCTCCTCATCTGCCAGGAC	37	22	37912254	GAGGAGGGGCCTGAGGGCCTGACCCAATTCTTGATGACAGAGGTGCGACG	22	36242200	F			NA	NA	CARD10	NM_014550	Body	chr22:37911979-37912258	Island			NA				NA
cg00266009	30690386	30690386	30690386	CAAACAACAACTTTAAAATAAACAACAAATTATACACCTCCTCTCAAAAC	0.000382713	NA		II			CAAGGAAGTGGCAAGCAACAACTTTGAGGTGAGCAGCAAGTTGTGCACCTCCTCTCAAGG[CG]CTGGATCAGCACCCCTGAGCTGCCCCCACAGCACACACTCCCAATGCGAGGCGGCGGCGG	37	8	85095275	CGCCTTGAGAGGAGGTGCACAACTTGCTGCTCACCTCAAAGTTGTTGCTT	8	85257830	R			NA	NA	RALYL	NM_001100393;NM_001100392;NM_173848	TSS200;TSS200;TSS1500	chr8:85096759-85097247	N_Shore		CDMR	NA				NA
cg00266604	63705386	63705386	63705386	TTTCTACAATAACACTATCACAATACTTCATACAATAACACCCCCCATCC	3.4e-05	NA		II			CATACACTGTATTTCTACAATAGCACTATCACAGTGCTTCATACAGTAGCACCCCCCATC[CG]CTAAAGATACATTCATACAGGAGTCCCCTCAATCCTCAGGAGATGCATTCCAAAACCCCC	37	6	30178343	CGGATGGGGGGTGCTACTGTATGAAGCACTGTGATAGTGCTATTGTAGAA	6	30286322	R			NA	NA	TRIM26	NM_003449	5'UTR	chr6:30180933-30182187	N_Shelf			NA				NA
cg00267142	58700307	58700307	58700307	AAATAAAAAACTATAAATTCTAAAAAATTCAAACRTTACCAACTCATACC	0.0176807	NA		II			ACGAAAATAGAAAATGAAAAACTGTAGGTTCTAGAAGATTCAAGCGTTGCCAACTCATGC[CG]GGAGACCTGCGCTCTGTCATAATGTTGCTTCTCCTTTTATACCTGACTCTGCCATCTGAT	37	6	167104601	AATGAAAAACTGTAGGTTCTAGAAGATTCAAGCGTTGCCAACTCATGCCG	6	167024591	R			NA	NA	RPS6KA2	NM_001006932	Body					TRUE	6:167024591-167024757			TRUE
cg00267274	65765457	65765457	65765457	ATTATCATTATACAACTATCTAATAAATATCAATCTCTAAACATACACAC	0.0105805	NA		II			CACAACTTTTTAAAAATGTTTAAAAGGTGAAACTAAAATTCTATACAACTATAAAGGGTG[CG]TGTGTATGTTTAGAGACTGATATTCACCAGATAGCTGTATAATGATAATGTCCTTGGGTC	37	7	5806497	TTATCATTATACAGCTATCTGGTGAATATCAGTCTCTAAACATACACACG	7	5773023	F			NA	NA	RNF216	NM_207116;NM_207111	5'UTR;5'UTR					TRUE				NA
cg00267323	32617455	32617455	32617455	TAAACCTTAACTTCCCTATATACATACCCTAAAAAAAACCTAAAATCTTC	0.00365448	NA		II			AGGAAGTGCTATGAACCTTGGCTTCCCTATATACATGCCCTAGGGAAGGCCTAGAATCTT[CG]TCAGTTAAATATCACTATTTGGGATTTCTCTCCAAATGAAGTAACTATGCAGAAAAACAT	37	7	36445177	GAACCTTGGCTTCCCTATATACATGCCCTAGGGAAGGCCTAGAATCTTCG	7	36411702	R			NA	NA	ANLN	NM_018685	Body					TRUE				NA
cg00267360	32781335	32781335	32781335	AATATCTACAAAATCTATCTAAAACCTATACTACTTATTCTAAACCACCC	0.00150882	NA		II			TAGAGAATATATTAATATTAGCATGACTCGAAGCGGGCAAGAGCTAATCGTAGCTCAGAC[CG]GGTGGTTCAGAACAAGCAGTACAGGTTTCAGATAGATTCTGCAGACATTTTAACAGTAGA	37	8	101119691	CGGGTGGTTCAGAACAAGCAGTACAGGTTTCAGATAGATTCTGCAGACAT	8	101188867	F			NA	NA	RGS22	NM_015668	TSS1500	chr8:101117922-101118693	S_Shore			NA				NA
cg00267713	19601309	19601309	19601309	AATTCTACAAAAAAATAAAACACAAACCAAAAAACATATATTTAACCATC	0.0126742	NA		II			TATGAGGTCGAGGAGTCCCCTAAGCCGGGAATCGAACTTGGTGAGGGGGGTTGGGACGGC[CG]ATGGCCAAATATATGCCCCCTGGCCTGTGTTTCATTTCTTTGCAGAACTGAGCAAGGATG	37	1	155053851	GTTCTGCAAAGAAATGAAACACAGGCCAGGGGGCATATATTTGGCCATCG	1	153320475	F			NA	NA	EFNA3	NM_004952	Body	chr1:155051155-155055291	Island			NA	1:153318633-153320476			NA
cg00268086	36602502	36602502	36602502	AAATATCAAACAAACAAAAAACAATACTATCCTTTACCTTAACTCTTACC	0.000473629	NA		II			CCAGGTGGTGAGGGTATCAGGCAGGCAGAGAACAGTGCTGTCCTTTGCCTTGGCTCTTAC[CG]TCTCTTATTCAGCATTCGGAACCCAGTTTTATAAATCCCAGGGCACCTACAGATAGACGC	37	17	5487376	CGGTAAGAGCCAAGGCAAAGGACAGCACTGTTCTCTGCCTGCCTGATACC	17	5428100	R			NA	NA	NLRP1	NM_033007;NM_033004;NM_001033053;NM_014922;NM_033004;NM_014922;NM_001033053;NM_033007;NM_033006;NM_033006	5'UTR;1stExon;5'UTR;1stExon;5'UTR;5'UTR;1stExon;1stExon;1stExon;5'UTR					NA		17:5487083-5488424	Promoter_Associated	TRUE
cg00268185	24742508	24742508	24742508	RATTACCTTTCTAAAAATCATCCRAAAAAAATACCTTTAATTTAAAAAAC	0.000200196	NA		II			GGCCGTCACCGAGTCCTCTAGCGAGGGTCTGGGAGCTGGGAGAAGGGTCCGCTTCTCCTC[CG]CCCCTCAAATCAAAGGCACCCCCTTCGGATGATTCCTAGAAAGGCAATCGCATCAGTGTC	37	3	123602768	CGCCCCTCAAATCAAAGGCACCCCCTTCGGATGATTCCTAGAAAGGCAAT	3	125085458	F			NA	NA	MYLK	NM_053026;NM_053028;NM_053027;NM_053025	5'UTR;5'UTR;5'UTR;5'UTR	chr3:123602588-123603540	Island		DMR	NA	3:125085279-125086230	3:123602741-123602928	Unclassified_Cell_type_specific	NA
cg00268840	51724452	46778469	51724452	TAACAAAAAATCCCCTCACCTAAACACAAACATAAAACATAAACAATACA	1.02e-05	46778469	TAACAAAAAATCCCCTCGCCTAAACGCAAACGTAAAACGTAAACGATACG	I	A	Red	TGGGCTGGGCCCGGCTTCAGAAGCTTTAGAGCGCTGCCCTCTGCGCTCCCGTCTAGAGGC[CG]CACCGTTCACGCCCCACGTCTGCGCCCAGGCGAGGGGATTTCCTGCCAGGCGAAGTACAG	37	11	44332653	TGGCAGGAAATCCCCTCGCCTGGGCGCAGACGTGGGGCGTGAACGGTGCG	11	44289229	F			NA	NA	ALX4	NM_021926	TSS1500	chr11:44332314-44332757	Island		DMR	NA	11:44288908-44290148	11:44332304-44332723	Unclassified_Cell_type_specific	TRUE
cg00269140	73727322	73727322	73727322	ACTCTACATATAATAATATATCTTTTCATCCATTCTTTACTCAAAAACTC	0.0062389	NA		II			TTTCCTTTCCCTGGATAAACTACTTTTGTATTGACTGAAAGTGCATTTCATTTCCGACAC[CG]AGTCCCTGAGCAAAGAATGGATGAAAAGACATATTATCATATGCAGAGTACAGAAATGCT	37	7	86389542	CTCTGCATATGATAATATGTCTTTTCATCCATTCTTTGCTCAGGGACTCG	7	86227478	F			NA	NA	GRM3	NM_000840	5'UTR					TRUE				NA
cg00269245	19641409	58678380	19641409	ATAATATAAAAATCACACATCAAAAAATCATAATAAATAAACACTATTCA	0.00334881	58678380	ATAATATAAAAATCACACGTCAAAAAATCATAATAAATAAACACTATTCG	I	A	Red	ACTGTTTCTGCAGTGGTATAAAAATCACACGTCAAAAAATCATGGTAAATGAGCACTGTT[CG]AATTCCCTTTTTCTTTCTCCACACTCTCTTAATACGTAAGGCCGTAGTGCCTTAGGTCAT	37	16	56858002	CGAACAGTGCTCATTTACCATGATTTTTTGACGTGTGATTTTTATACCAC	16	55415503	R			NA	NA	NUP93	NM_014669	Body					TRUE		16:56857799-56858648	Gene_Associated_Cell_type_specific	NA
cg00269659	59660359	59660359	59660359	ACCTAACACATACTAAAAAAACCCCTCRATACCAAAACAAAAAACAAAAC	0.0161189	NA		II			GCCCGATTCCCGTTCTGCTGTATTCCTTACCCCCTGTGTTGGGGAGGGAGGAGCTGCAGA[CG]CTCTGCCTCCTGCCCTGGCACCGAGGGGTTTTCCCAGCATGTGCCAGGTCAGCCCTGGGC	37	16	27729685	CGCTCTGCCTCCTGCCCTGGCACCGAGGGGTTTTCCCAGCATGTGCCAGG	16	27637186	F			NA	NA	KIAA0556	NM_015202	Body					TRUE				NA
cg00269800	61752345	61752345	61752345	ATAAAAAAAATCTTTCAAAAAAATACACTCTTCTCCTACAAATAATAAAC	0.0144693	NA		II			CAAAGCCACAGATGGGGGAGGTCTTTCAGGAAAGTGCACTCTTCTCCTGCAGGTGGTGGA[CG]TGAATGACAATCCCCCACAGGTGACCATGTCTGCACTCACCAGCCCCATCCCAGAGAACT	37	5	140563151	CGTCCACCACCTGCAGGAGAAGAGTGCACTTTCCTGAAAGACCTCCCCCA	5	140543335	R			NA	NA	PCDHB16	NM_020957	1stExon	chr5:140563510-140564361	N_Shore			NA	5:140543335-140543461			NA
cg00270764	18796457	18796457	18796457	TACCCAACRATTCCCAATAACATCAATAACCACAAAATCATAATTTCCCC	9.56e-06	NA		II			TTCCCTATTCATGCCCAGCGGTTCCCAATGACATCAGTGACCACAAGGTCATGATTTCCC[CG]GACATTCCCTGCTTGATCTTCCATGATGTCACCTGCTAACGCGTCTCACCTGATCTTTCA	37	16	28511362	CGGGGAAATCATGACCTTGTGGTCACTGATGTCATTGGGAACCGCTGGGC	16	28418863	R			NA	NA	IL27	NM_145659	Body	chr16:28509237-28509509	S_Shore			NA				NA
cg00271210	47671441	11763334	47671441	TCCATCTTCACATCCCAAAAACCAAAACTAAAAACAAAAACAAAATCACA	0.000121709	11763334	TCCATCTTCGCATCCCAAAAACCAAAACTAAAAACGAAAACAAAATCACG	I	A	Red	AATGAGGAACAGCCATTCCCCTCCAGCAGGGCCTCGGCAGGTGGGCCCGGCAGGTGCTCC[CG]TGACTCTGCCTCCGCCTCCAGCCCTGGTCTCTGGGATGCGAAGATGGATGGAAAGACCAT	37	6	167070053	TCCATCTTCGCATCCCAGAGACCAGGGCTGGAGGCGGAGGCAGAGTCACG	6	166990043	F			NA	NA	RPS6KA2	NM_001006932	Body					TRUE	6:166990017-166990680			NA
cg00272200	42793353	23809450	42793353	ATTTACCAAAAAACTCCAAAAACATAAACAACAAATCCAAAAAAAAAACA	0.00701385	23809450	ATTTACCGAAAAACTCCAAAAACGTAAACAACGAATCCGAAAAAAAAACG	I	A	Red	CTGGCCAGAAGTGAATGCACCAACATCCATAACTCCTCGGAAAAGCCGGCTGACTCCCCT[CG]CTCCTTTCTCGGATCCGCTGCCTACGCCTCTGGAGCCTCCCGGTAAATGGTGGACGTGGG	37	5	44388972	CGCTCCTTTCTCGGATCCGCTGCCTACGCCTCTGGAGCCTCCCGGTAAAT	5	44424729	F			NA	NA	FGF10	NM_004465	TSS200					NA	5:44424556-44424849			NA
cg00273340	14788504	14788504	14788504	AAAAACAATAAAAACTACTAACCAAAAACTAAAATCTACRTCCCAAAAAC	0.00186215	NA		II			GCCCGGCTGCGGGAGGCAGTGGAGGCTGCTGGCCAGGAGCTGGAGTCTGCGTCCCAGGAA[CG]GGAGGCGCTGGTGGAGGCGCTGGCAGCAGCGGGCCGGGAGCGGAGGCAGTGGGAGCGTGA	37	11	64112444	GAGGCAGTGGAGGCTGCTGGCCAGGAGCTGGAGTCTGCGTCCCAGGAACG	11	63869020	R			NA	NA	CCDC88B	NM_032251	Body	chr11:64112327-64112607	Island			NA	11:63869009-63869123			NA
cg00273449	39738398	39738398	39738398	CRTAAACCRAACTCRAACCAATCCTCAAACAAATATTAATTACRCTAACC	0.000202673	NA		II			ATGACTCCGACAGCGATTTCGGAGCCTCTCTCGGCGTCAGTCTTGCGCCGGCACCCGCCA[CG]GCCAGCGCAACCAACACCTGCCTGAGGACTGGCCCGAGCTCGGCCCACGCCCAGCCCAGC	37	2	74875268	CGGCCAGCGCAACCAACACCTGCCTGAGGACTGGCCCGAGCTCGGCCCAC	2	74728776	F			NA	NA	C2orf65	NM_138804	TSS200	chr2:74875128-74875562	Island			NA	2:74728583-74729057			NA
cg00273657	73695363	73695363	73695363	AACAACACAAATATATCATCTCACAATTCCAAAAAATAAAAATCCAAACC	0.000647485	NA		II			TAGTGGCTTAAAACAACACAAATGTATCATCTCACAGTTCCAGAGGGTGGAAGTCCAAAC[CG]GGTCTCCCTGAGCGAGGGTCAAGGTGTTGGCAGGACTGCTTCCTTCTGGGGCCTCGAGGG	37	10	127262562	ACAACACAAATGTATCATCTCACAGTTCCAGAGGGTGGAAGTCCAAACCG	10	127252552	R			NA	NA	LOC100169752	NR_023362	TSS1500					NA				NA
cg00274357	34794432	34794432	34794432	TAAAAATAAAATATTACCCAATAAAATAACCCAACCAAATCCCTAACCTC	0.000660027	NA		II			GGCAGGGCACCTAGGGGTAGAGTGTTGCCCAGTAGAATGGCCCAGCCAGATCCCTGGCCT[CG]AAGCTCACCAGGTCATAAGCCCCAGCCACTAAAAGCATCTCACTCTTCAATGCAGCTGGA	37	8	144912822	CGAGGCCAGGGATCTGGCTGGGCCATTCTACTGGGCAACACTCTACCCCT	8	144984810	R			NA	NA	PUF60	NM_078480;NM_014281	TSS1500;TSS1500	chr8:144911055-144912075	S_Shore			NA				NA
cg00274815	53642370	66605418	53642370	AAATCTCTACCTCTAATCTAAACCCCAACTCCCACTACAAAAACACAACA	0.000528766	66605418	AAATCTCTACCTCTAATCTAAACCCCAACTCCCACTACAAAAACGCAACG	I	T	Red	CATTCATCGTCAGGGCAATGCCATGCTCCAGGCACGGCCGCGCCTTATCTCCCTCGCCCA[CG]CTGCGCTCTTGCAGTGGGAGCTGGGGCTCAGATCAGAGGCAGAGACCCCCCGCTGACCCT	37	5	178631741	CGCTGCGCTCTTGCAGTGGGAGCTGGGGCTCAGATCAGAGGCAGAGACCC	5	178564347	F			NA	NA	ADAMTS2	NM_021599;NM_014244	Body;Body					NA	5:178564074-178564505			NA
cg00274909	46700304	46700304	46700304	TTCACAAAATAAAACRCCACTTCCAATAATCATATCRTAAAAATTTCCTC	0.000148761	NA		II			GTTCACACTGATTCACAAAGTAAGACGCCACTTCCAATGGTCATATCGTGAAGGTTTCCT[CG]AAGGATCGTGAAATTCCACGAAGTCCGCTTGCTTTCCTGGGTGAATAAACACCAGGCCGC	37	11	131799642	CGAGGAAACCTTCACGATATGACCATTGGAAGTGGCGTCTTACTTTGTGA	11	131304852	R			NA	NA	NTM	NM_001144059;NM_001048209;NM_001144058;NM_016522	Body;Body;Body;Body					NA	11:131304852-131304912			NA
cg00275234	72789410	46663356	72789410	AATCTATAAAACACCTCCTCCTCTATCCACCCAAAAAAATCTACAAAACA	0.0192843	46663356	AATCTATAAAACGCCTCCTCCTCTATCCACCCGAAAAAATCTACGAAACG	I	C	Grn	TCCGCCTGAGAAGGTCTGTGGGGCGCCTCCTCCTCTGTCCACCCGAGAGGGTCTGCGGGG[CG]CCTCCTCCTCTGTCCGCCCAAGAGGGTCCGCGGGGCGCCTCCTCCTGTGTCCGCCCGAGA	37	7	895457	CGCCCCGCAGACCCTCTCGGGTGGACAGAGGAGGAGGCGCCCCACAGACC	7	861983	R			NA	NA	UNC84A	NM_025154;NM_001130965	Body;Body					NA	7:861888-862306			NA
cg00275828	19804392	19804392	19804392	AACTCACTTAAAAATAAACTTATAATTTTTCATATAAACAAAAACCACAC	3.75e-05	NA		II			GCTCCTTCCATGACTCACTTAAAGATAGGCTTGTGGTTTTTCATATGAGCAGGGACCACA[CG]AAATGCAGATCCCTGGCCACTGGTGTGGTCACTCTCCCCTGACTAGGACCTGGGCTTTCC	37	17	39222690	CGTGTGGTCCCTGCTCATATGAAAAACCACAAGCCTATCTTTAAGTGAGT	17	36476216	R			NA	NA	KRTAP2-4	NM_033184	TSS1500					NA				NA
cg00276443	17615510	64722509	17615510	CATCTACTCCAACTAAAAACAACAAACTACACAACTACAAACAACAAACA	0.0239674	64722509	CGTCTACTCCAACTAAAAACAACAAACTACACAACTACAAACAACGAACG	I	A	Red	CCGCAGCATCAGCGTCTGCTCCAGCTGAAAGCAGCAAGCTGCACAGCTGCAGGCAGCGGG[CG]GTGGTGGCCTCGGCATCGGTGATGGACTGGCAGCGGACGTCACAGGCAGCCAGCAGTGGG	37	7	150878319	CGCCCGCTGCCTGCAGCTGTGCAGCTTGCTGCTTTCAGCTGGAGCAGACG	7	150509252	R			NA	NA	ASB10	NM_080871;NM_001142459;NM_001142460	Body;Body;Body					NA	7:150509152-150509397			NA
cg00277246	19671428	19671428	19671428	AAATACCAAACCTCTATCCCCACCCCAAACCCAAATAAAAAACTACATAC	0.00279829	NA		II			TCGTTCTCTTTGGCCTGGGCCAGGATCTCCTCACGAGAGGCGCGGGTGTCATCCAGCTCG[CG]CATGCAGTCCTTCATCTGGGCCTGGGGTGGGGACAGAGGCTTGGCACCCCACCCAGCTCC	37	22	36682870	GGTGCCAAGCCTCTGTCCCCACCCCAGGCCCAGATGAAGGACTGCATGCG	22	35012816	F			NA	NA	MYH9	NM_002473	Body			low-CpG:35012709-35012832		TRUE		22:36682179-36683384	Gene_Associated	NA
cg00277397	46772359	46772359	46772359	CTCATAAATTCTATATACACRAATATTACRTATATCTCAACACACACAAC	0.0265986	NA		II			AATGCTAGGAGCTCATGAGTTCTATGTGCACGAATGTTGCGTGTGTCTCAACACACACAG[CG]CAGAAATCTACCCATTCTTTCTGAGAAGGTCATCCCAACTCTGTCGCAGAGGCTACTGTG	37	7	71800412	CGCTGTGTGTGTTGAGACACACGCAACATTCGTGCACATAGAACTCATGA	7	71438348	R			NA	NA	CALN1	NM_001017440;NM_031468	5'UTR;Body	chr7:71800757-71802768	N_Shore		RDMR	NA				NA
cg00277753	49671336	46787404	49671336	ACAAAAACTTTCTCAAAACATCAACTACTCAAAAACATCCTAAATTCACA	2.47e-05	46787404	ACGAAAACTTTCTCAAAACGTCGACTACTCAAAAACGTCCTAAATTCACG	I	C	Grn	CAGCTCTGCAAGTGTTTAACAAGAAATAACAAGAAAACGGCTGTCCCCGAGAAGCAGCTG[CG]TGAACTCAGGACGCTCCTGAGCAGCCGACGTTTTGAGAAAGCCCTCGCCATCCTGAAGGC	37	10	134918927	GCGAGGGCTTTCTCAAAACGTCGGCTGCTCAGGAGCGTCCTGAGTTCACG	10	134768917	F			NA	NA	GPR123	NM_001083909	Body	chr10:134918755-134918975	Island			NA	10:134768661-134768945			NA
cg00277769	27726441	68611370	27726441	ACAACATTAAAATTAAACCTCTCCACTAAAACTTCCCAACCATCAACACA	0.00067132	68611370	ACGACATTAAAATTAAACCTCTCCACTAAAACTTCCCGACCGTCAACACG	I	T	Red	TTGCTTAAGCAGGCGACATTAGAGTTAGGCCTCTCCACTGAAGCTTCCCGACCGTCAGCA[CG]TGGCAGACAGGATGCGCCCATCATTCCGCAAGGGAGAACCGGAGAGGCCCGGGAGAGTCC	37	7	97922759	GCGACATTAGAGTTAGGCCTCTCCACTGAAGCTTCCCGACCGTCAGCACG	7	97760695	R			NA	NA	BAIAP2L1	NM_018842	3'UTR					NA	7:97760683-97761070			NA
cg00277927	68677308	68677308	68677308	TAAACACTCTCCAAAACAAAAAATCTAAATTCTTCAAAAACAACAACATC	3.02e-06	NA		II			ATTCAGATTGTTGGACACTCTCCAGGACAAAAGGTCTAGATTCTTCAAAAACAACAACAT[CG]AAAAAAAAAAACTGCCAGAAAGAAAAAATACAGAGGGAGAAGGTAAATTAAAAGAAACAT	37	19	29456219	CGATGTTGTTGTTTTTGAAGAATCTAGACCTTTTGTCCTGGAGAGTGTCC	19	34148059	R			NA	NA	LOC148145	NR_027318	Body					NA				NA
cg00278028	31700403	40664415	31700403	TTAAAAAACCCATACCCCAAACAATTATCACAACCACAAATAAATCTACA	0.0105038	40664415	TTAAAAAACCCATACCCCGAACGATTATCACAACCGCGAATAAATCTACG	I	A	Red	CTAGGAGCCGTGTTGGGGGGCCCATGCCCCGGGCGGTTGTCACAGCCGCGGGTGGGTCTG[CG]GGGAGGGGACGAAGCCGCGGATGAACGGAGACAAAAAGTTAAGTGGGGGGAATGGGGAGG	37	22	28196834	TTGGGGGGCCCATGCCCCGGGCGGTTGTCACAGCCGCGGGTGGGTCTGCG	22	26526834	R			NA	NA	MN1	NM_002430;NM_002430	5'UTR;1stExon	chr22:28192793-28198592	Island		DMR	NA	22:26525653-26528592			NA
cg00278359	29620408	29620408	29620408	CCRAAATTCAAAATCCATTTCCACCCTTCTATTAACTTCATACCCCTCTC	9.5e-08	NA		II			CTCGAGCCTTCCCGGAGTTCAGGGTCCATTTCCACCCTTCTGTTGGCTTCATGCCCCTCT[CG]CCATCTTCCACAGGCCTCTGCTCTGCTGCCTCCACTCCTGCGGAACTGTTGCCTTGGGCC	37	6	30652829	CGGAGTTCAGGGTCCATTTCCACCCTTCTGTTGGCTTCATGCCCCTCTCG	6	30760808	R			NA	NA	KIAA1949	NM_001134870;NM_133471	Body;1stExon	chr6:30654392-30654934	N_Shore		RDMR	NA		6:30652289-30655443	Promoter_Associated	NA
cg00279406	66695400	66695400	66695400	TATACCTAAATATACRCCTCAAACATACCCACTTTCTAATTCACCTACAC	0.00138182	NA		II			TGGCGGAGCTCTGTGCCTGGATGTGCGCCTCAAACATGCCCACTTTCTGGTTCACCTGCA[CG]TTCTGCAACTCGCGCTGCAAGATCCGCAGCTTCCTCTTGGCCTCCTCCGGCCCTGGCGGG	37	1	226924739	CGTGCAGGTGAACCAGAAAGTGGGCATGTTTGAGGCGCACATCCAGGCAC	1	224991362	R			NA	NA	ITPKB	NM_002221	Body	chr1:226924560-226926553	Island			NA	1:224990833-224993354			NA
cg00280345	48641420	48641420	48641420	RAAACACAAATTAACATAAACCTAACCCCAAACAAAACCAACCCCTACCC	1.14e-09	NA		II			GGCAGCTGCCCAAGGTCCACCTGCCACCAGGGCTGCCACTTGGACTCCCTTGCCAGGGGG[CG]GGCAGGGGCTGGCTCTGCCTGGGGCCAGGCCCATGTTAACCTGTGCCCCGGCCTGGGGGC	37	8	145728388	GGGCACAGGTTAACATGGGCCTGGCCCCAGGCAGAGCCAGCCCCTGCCCG	8	145699196	F			NA	NA	GPT	NM_005309	TSS1500	chr8:145725460-145726707	S_Shore			NA				NA
cg00280758	45649334	45649334	45649334	AATCTATCTTTAAATCTCCACTACTCCRCTCCAAAATAACTCATAAAATC	4.93e-06	NA		II			AGCTCCAGGGTAGTCTGTCTTTAAGTCTCCACTACTCCGCTCCAAGGTGACTCATAAGGT[CG]GTCCGTCAACTCTGCATTATATGGCCTCAACAACGAAATTAAAACACATACTTTAACCTC	37	4	140221967	GTCTGTCTTTAAGTCTCCACTACTCCGCTCCAAGGTGACTCATAAGGTCG	4	140441417	R			NA	NA	NAA15	NM_057175	TSS1500	chr4:140222426-140223335	N_Shore			NA		4:140221960-140223948	Promoter_Associated	NA
cg00280799	29781340	29781340	29781340	CAACTATAAATAAAATATTATACACACACTATCACAAACCTTCACAAACC	0.000482951	NA		II			TTCTCGAGGACCAACTGTAGATGAAGTGTTGTACACACACTGTCACAAACCTTCACAAAC[CG]AAGCTCCTGGAGGCAAGGTGGCCTATCCAAGGGCACTCAGCTAGTAAATGCAGAACAAAG	37	7	149465477	CGGTTTGTGAAGGTTTGTGACAGTGTGTGTACAACACTTCATCTACAGTT	7	149096410	R			NA	NA	ZNF467	NM_207336	Body	chr7:149461653-149463222	S_Shelf		CDMR	NA				NA
[truncated: 79,598 more rows]
